# Supplementary material for: Integration of Metabolome and Transcriptome Reveals the Major Metabolic Pathways and Potential Biomarkers in Response to Freeze-Stress Regulation in Apple (Malus domestica)
Source: MDPI journal article supplement (doi:10.3390/metabo13080891), 2023-07-27
Supplement: s1 [file Table S1.xlsx]

## Sheet: Sheet1
Table S1. Primer list and their sequence information.
Gene ID	Type	Sequence	Start	Length	Tm	GC Percent
HF19026	Forward Primer	TGGACTTGCACGGATACATAAA	503	22	62.114	40.909
	Reverse Primer	TTCCTCCACTCCTTCCTTCT	612	20	62.088	50
HF06976	Forward Primer	GAGAAAGAGCAGAATGGGTAGAA	294	23	61.97	43.478
	Reverse Primer	TGGGACAAATTTCAGGTAGGG	399	21	61.988	47.619
HF21117	Forward Primer	CCAGAGACAAAGTCACCATCTT	482	22	62.122	45.455
	Reverse Primer	ATCAACGGCCCTGATTGTATAG	576	22	62.096	45.455
HF39213	Forward Primer	CATCGCTTGAGAGCTTGATAGA	1028	22	61.931	45.455
	Reverse Primer	TGAGTCGCCCTTGTACTTTG	1125	20	62.005	50
HF18436	Forward Primer	GTCCGATGATGATGACCAGTTAG	654	23	62.28	47.826
	Reverse Primer	CTCACTTTCAGTCGGTACAAGAG	759	23	62.262	47.826
HF08780	Forward Primer	GTTCCCATCTACGAGGGTTATG	550	22	61.818	50
	Reverse Primer	CCCGTTCAGCAGTTGTAGTAA	682	21	62.011	47.619
HF08656	Forward Primer	TGGGTACTGGAGGAGATTGATAG	16	23	62.559	47.826
	Reverse Primer	CCCACAGAACAGGAAGCATATC	127	22	62.592	50
HF39036	Forward Primer	GGAGCGTTACCAGCAACATA	249	20	62.13	50
	Reverse Primer	GTACGGAGACCACTGCATTC	347	20	62.165	55
HF13536	Forward Primer	GATCTCACTCCCAAGGAGTTTC	298	22	61.983	50
	Reverse Primer	GGAAGTATCGGAGCCTTGTTAG	389	22	62.007	50
HF37215	Forward Primer	CCTTCCTCCCTAGACGTGATA	164	21	61.94	52.381
	Reverse Primer	CCTTCCAGTAGCCAGCTTTAG	271	21	62.024	52.381
