# Supplementary material for: Integration of Metabolome and Transcriptome Reveals the Major Metabolic Pathways and Potential Biomarkers in Response to Freeze-Stress Regulation in Apple (Malus domestica)
Source: MDPI journal article supplement (doi:10.3390/metabo13080891), 2023-07-27
Supplement: s1 [file Table S2.xlsx]

## Sheet: Sheet1
Table S2. Information and quantification of all metabolites in forty-eight samples.
ID	name	gg11	gg12	gg13	gg14	gg15	gg16	gg21	gg22	gg23	gg24	gg25	gg26	gg31	gg32	gg33	gg34	gg35	gg36	gg41	gg42	gg43	gg44	gg45	gg46	gg51	gg52	gg53	gg54	gg55	gg56	fs11	fs12	fs13	fs14	fs15	fs16	fs21	fs22	fs23	fs24	fs25	fs26	fs31	fs32	fs33	fs34	fs35	fs36
pos_1005	Tridemorph	847.866	909.667	974.563	980.131	1347.49	1063.38	1788.64	1022.59	1018.26	2096.53	806.031	777.751	754.256	758.921	800.286	884.125	753.142	791.534	875.888	907.118	811.802	841.741	865.425	802.305	830.853	729.243	768.868	787.127	922.092	884.668	789.825	685.934	717.082	699.171	627.988	735.294	724.198	729.226	683.88	760.076	711.192	783.681	761.469	738.931	670.415	726.159	657.989	769.278
pos_1022	O-Phospho-L-homoserine	223.807	377.609	292.98	295.223	308.642	364.295	146.515	289.648	145.213	267.019	228.636	237.241	278.876	240.121	200.296	242.34	315.55	160.718	244.931	92.6899	254.353	227.099	304.031	135.624	165.138	240.816	221.75	189.618	434.257	200.328	29.7862	29.307	30.7099	28.4043	23.7313	37.7358	53.0333	85.3418	54.8147	24.2744	23.7903	24.6515	34.5664	54.314	15.5644	15.83	31.402	42.8023
pos_1027	(5alpha,10alpha)-3,7(11)-Eudesmadien-2-one	9877.37	20924.6	19903.4	21234.3	8550.66	10205.5	8125.92	13019.6	7119.92	10107.8	11692	10489.2	13061.5	11920	11193.1	11726.3	11970.9	11751.9	12330.8	9598.78	12522.2	11490.4	11683.4	13135.1	14862.1	13435.5	14322.7	12572.8	14683.9	19758.9	6923.27	6794.37	4852.79	5689.55	6437.44	5673.12	5521.52	5378.21	5110.92	6475.49	6336.84	6290.36	7985.98	6364.36	9896.91	9425.38	6213.3	7234.43
pos_1028	Elemonic acid	71634.4	101161	104203	101431	72994.6	81071.7	53480	89627.3	48563	76939.5	77701.6	71729.4	80944.9	74869.2	85544.1	71058.5	92861	80221.1	91165.1	63425.5	93666.1	81394.8	92355.5	77653.5	91085.7	97812.7	88601.1	73420.2	102756	107213	59224.7	53427.1	37526.1	48779.6	53988.9	44391.9	57216.9	52181.8	51594.9	59282.9	60061.3	56886.7	71541.1	63117.6	75520.8	73565	63770.9	53065.2
pos_1032	Dronabinol	16130	12766.9	16823.9	15636.5	16886.6	7613.6	15529.1	14892.9	11878.5	13354.5	11638.5	12249.6	12913.8	13503.9	13387.8	12673	8091.14	13147.5	14713.1	13199.7	14614.1	15835.2	17379.7	13871.4	14104.8	9382.09	13564.9	13106.6	16281.9	15321.6	12770.8	10947.9	10007.6	13065	10310.9	12054.7	5584.39	11088.9	8956.25	10632.6	9765.43	11382.5	11335.3	11195	10130.4	10764	9397.95	11592.5
pos_1033	Decanoyl-L-carnitine	8617.39	12608.3	9398.57	8551.41	10801.6	7977.4	11244.8	8722.3	6978.28	9377.56	8032.28	8607.96	7676.27	7127.18	8910.91	7563.76	7157.28	10971.7	6310.74	6270.19	9015.54	9278.66	12810.4	9924.05	8408.11	7462.5	10399.7	9716.62	11265	12463.8	7761.66	9411.93	9158.17	11757.2	7461.56	10065.1	4462.82	7485.26	11098.9	10801.8	20639.3	9137.09	7727.87	8442.92	11506	7114.21	8351.97	8390.51
pos_1034	PA(18:3(6Z,9Z,12Z)/16:0)	96070.3	68046.8	95733.3	90762.3	98497	57114.1	100151	90160.8	77461.5	86154.4	72407.4	75979.4	78510.2	80141.6	85856	75649.2	54657.5	80721.4	77280.1	76999.5	86949.6	95382.2	102513	82581.7	87023.5	62909.3	83355.1	85934.4	93773.3	89594	76024.3	70669.6	69942.1	88458	70729.2	87472.1	44254.1	72364.9	66298.6	71164.3	72344.5	74739.8	73940.6	68514.1	64604.6	70726.3	62534.3	76945.4
pos_1037	beta-Sitostenone	25245.5	32219.7	31750.3	33964.8	31101.1	31599.6	20384.8	37332.1	17636.8	30246.8	29654.6	32257.3	36285.1	30545	21966	35530	38474.6	30958.9	31947.7	20089.2	40551.8	34979.1	32065.6	27834.4	39203.4	35484	40553.9	27699	32980.1	31904.7	28813.2	25441.6	14602.9	27321.8	26014.9	31188.7	28863.9	32154.1	32360.8	22729.2	37722.3	35688.4	36515.4	26082.3	34139.1	39269.5	25393.7	22934
pos_1047	all-trans-Nonaprenyl diphosphate	76351.1	77785.9	33818.2	33691.8	40135	44960.7	37411.8	54805.7	38310.9	54230.4	32578.5	35872.9	43198	34289.8	36218.3	36760.5	52662.7	33726.5	29441.2	33071.8	37142	33915.8	31517.8	29266.1	39800	37988.9	31942	31418.3	38104.6	36023.2	47417.3	52267.2	50817	66004.7	47272.5	105520	67596.6	65553.5	56407.3	44805.7	46690.2	39904.3	48369.1	45304.8	40432.7	38108	42594.2	25742.7
pos_1051	Soyasapogenol B	41765.4	59513.1	61759.6	60465.7	39073.5	43647.6	29538.4	56953.4	32397.6	42359.8	50836.2	46941.3	56803.9	50775.5	51762	54278.2	54790.5	50105.2	51630.6	36706.7	66243.3	55497	52927.2	51463.7	64535	67417.9	60357.7	50352.2	69500.3	79215.2	55608.2	54454.9	28422.2	37338.2	54374.5	29771	40134.1	40060.7	34891.8	51208.6	38159.5	35566.5	53365.5	54247.3	64250.5	56516.6	53953.1	39953.9
pos_1054	Oblongolide	1684.38	1633.38	1509.66	2099.45	2492.69	1963.79	2158.87	1940.33	2069.06	1862.78	2216.88	2084.87	1889.52	2325.48	2261.1	1927.98	1818.52	2328.81	1484.5	1837.26	1986.44	2020.22	2233.43	2048.78	1744	1726.2	2236.07	2305.03	1906.97	2193.94	1755.25	1753.47	1593.63	2132.96	1756.13	1848.67	1923.9	1738.85	1637.69	2031.55	1957.22	2437.9	1786.64	2030.33	2117.5	1908.91	1682.63	2086.82
pos_1055	Norethindrone	1652.5	1769.55	1726.13	2112.61	2170.26	1830.57	1885.1	2060.57	1836.39	1908.33	2041.85	1942.97	2057.56	2291.53	2056.69	2073.98	1829.97	2191.55	1612.96	1627	2067.42	2011.45	2067.03	2005.36	1959.74	1857.02	2178.63	2068.94	1990.05	2210.04	1658.58	1640.47	1385.78	1793.98	1639.69	1522.07	1624.11	1572.82	1491	1719.94	1736.74	1963.29	1642.73	1800.53	1878.3	1694.01	1565.28	1697.57
pos_1078	10-Hydroxymelleolide	14905.9	14590.3	15082.7	15512.4	15305.5	15533.4	15658.3	17374.5	15962	15249	17458	17530.7	17340.9	15185.3	14987.5	16638.7	18143.9	16063.2	18772.1	19008.5	18835.9	18107.4	17854.5	18326.9	16090.1	17149.7	17596.4	18118.6	17465.5	17629.9	17720.9	18396.3	17579.6	18614	16673.3	19113.5	20345	19714.1	20081.1	19206.9	19514.8	20035.2	19152	21136.6	19943.1	20560.7	18667.3	19989.2
pos_1090	5-Methyltetrahydrofolate	30.9717	30.9957	52.0426	41.5311	31.4377	167.521	47.2807	48.6239	100.236	76.8766	41.612	105.688	69.8322	38.5377	49.763	6.62555	86.5904	8.77353e-08	59.403	80.1655	101.77	59.1855	54.8518	338.356	9.91878	90.6992	105.222	103.245	102.79	32.4699	77.3826	91.5465	100.948	98.4507	71.8287	288.648	136.183	75.9889	174.782	145.831	121.191	285.696	172.069	128.86	177.931	105.598	258.485	209.633
pos_1091	Tyr Glu Pro Pro	30889.1	31320	31801.7	32927.1	31537.2	32191.6	33329.3	36388.8	32285	31949	38203.9	37986.2	37988.1	32598.1	32558.1	34555.1	38720.6	33716.1	41116.2	41101.3	39889.7	38226.3	38122.8	39862	33701.6	35500.2	37529.9	39367.7	36774.4	36328.4	36448.9	38139	37114.2	39592.9	33966.3	41276.5	43608.6	41955.7	43792.4	40788	41935.2	42554.1	41791.7	45775.1	43151.1	44298.5	40009.6	42545.7
pos_1093	Dehydroandrographolide succinate	6084.12	6166.1	5855.92	6163.56	6325.84	6126.79	6517.97	7100.8	6349.05	6023.9	7008.38	6870.05	7069.77	6364.7	5782.23	6506.02	7266.14	6429.27	7466.42	7502.7	7553.93	7278.69	7198.55	7207.8	6443.8	6867.02	7081.4	7363.18	6995.06	6872.12	6898.54	7327.02	6952.92	7326.08	6525.05	7495.01	7513.49	7725.28	7922.81	7496.49	7508.58	7632.5	7211.04	8208.13	7870.27	7952.48	7179.13	7529.74
pos_1094	Protoporphyrin	1263.4	1496.81	1184.7	1315.25	1228.86	1305.51	1392.84	1465.6	1274.37	1255.23	1514.73	1573.61	1506.69	1259.23	1176.4	1294.9	1592.89	1220.62	1518.48	1565.98	1626.99	1527.95	1424.39	1615.05	1247.95	1346.9	1292.8	1402.9	1548.93	1345.07	1425.37	1591.38	1509.9	1590.38	1430.43	1668.65	1704.74	1669.21	1724.42	1616.98	1730.43	1712.64	1516.68	1752.94	1715.52	1744.29	1644.87	1610.53
pos_1096	Berbamunine	38307.4	38473.8	38233.3	38499.4	37457.9	38578.9	38044.4	43558.7	37869.7	36836.8	45815.8	46166	44636.9	37257.4	36517.7	41694	47740.6	41183	48272.6	48103.5	49148.6	45958.3	46966.2	48688.8	40521.2	44027.4	46374.4	48659.9	46106.7	46618.9	43368.6	46862.5	45461.5	49078.2	43501.7	49860.5	52174.4	51091.3	53372.9	49856.4	51408.3	52055.8	48135.8	55614	53770.3	54417.5	48059.8	52152.2
pos_11	5-(3'-Carboxy-3'-oxopropenyl)-4,6-dihydroxypicolinate	488.226	547.747	528.377	508.918	478.847	507.266	655.143	541.376	617.904	501.269	444.5	527.944	522.841	565.825	505.858	495.217	452.673	486.29	500.962	471.437	480.203	460.717	433.924	477.871	511.44	455.22	486.142	480.41	474.937	511.63	518.486	485.845	493.374	467.853	567.288	507.859	521.79	469.167	470.779	548.254	503.838	542.076	498.059	471.87	480.9	485.979	471.591	595.265
pos_1104	Cholic acid	4690.72	4599.42	4826.57	5242.4	7118.31	4385.83	6755.78	6661.4	5673.63	5963.99	4537.3	4519.46	5359.96	4872.27	6402.62	5858.97	2709.67	4601.66	4586.51	4696.98	4013.67	3524.2	3809.66	4210.55	5093.09	3511.53	3842.67	3312.21	5557.33	4893.25	5067.27	3659.43	3043.07	3080.04	3867.69	3314.8	2838.3	2600.68	3545.53	3177.47	3971.34	4756.24	3529.44	3531.89	3965	3150.08	4240.47	3871.44
pos_1109	alpha-Tocopherol	3607.29	4787.3	4394.29	4949.2	4031.05	4059.68	3356.74	4265.34	3356.51	3941.94	3567.57	3505.53	4051.91	4416.25	4261.02	4283.94	3890.16	4317	3128.22	2379.26	4159.64	3672.17	3442.41	3191.89	4713.95	4213.16	4355.89	3171.05	4070.13	4237.22	5868.31	5201.01	4677.04	5209.7	5995.61	4224.31	4759.56	5986.19	5826.82	4824.78	5440.66	5557.61	5594.2	4883.41	5490.28	5671.99	5356.1	3959.74
pos_1110	4,4'-Diaponeurosporenic acid	999.63	1241.16	3023.92	2093.59	1038.65	1195.29	1124.75	1018.11	886.146	1233.95	1154.71	1224.48	1143.79	1437.36	1899.75	1358.83	1187.8	1189.35	1718.94	1366.93	1282.99	1153	1202.39	1364.42	1341.91	1091.04	935.269	1330.13	1294.94	1143.6	1003.2	856.642	858.496	764.275	699.128	895.442	1385.97	1771.58	862.237	736.423	1060.51	873.364	1491.41	1497.75	727.724	769.842	1472.3	891.121
pos_1113	Sapindoside A	3480.67	4055.35	3448.33	3009.72	3104.34	2789.68	4118.74	3082.71	4737.75	4329.56	2286.4	2379.59	2949.13	3332.08	5842.41	6554.3	2556.8	3695.11	2384.57	2297.74	4682.4	4295.52	2790	2900.72	3258.84	3791.29	3141.24	3132.11	3239.94	2983.01	2600.9	2630.56	2875.21	2077.23	2689.73	1743.52	1340.83	1581.91	1883.24	1563.58	1604.43	1605.51	1641.59	1874.09	1277.78	1632.14	1358.14	1476.02
pos_1114	Ginsenoside Rg6	16978.3	19666.2	12700.7	11700.2	17612.2	16857.3	19852.3	15524	35200.9	30905.4	12035.8	14489.1	14011.4	15472	46385.5	62188.3	13890.4	22591.3	10989.5	10765.7	29015.6	27066	13847.1	17106.7	14667.3	20549.8	16943.5	16959.7	19384.9	15683.4	12199.8	15163.6	15269	10993.6	12945.4	9330.36	6433.15	9302.92	10108.3	9236.66	8760.84	9406.94	8250.76	10932.6	7225.9	9602.79	8349.98	8582.05
pos_1121	PI(17:2(9Z,12Z)/20:0)	7604.63	6669.48	7559.7	6971.67	10773.9	5236.45	14393.9	11498.7	9687.5	7411.02	5249.9	5921.86	6340.88	5868.02	7484.36	8703.42	4289.35	5998.42	9146.95	7710.41	6819.14	6078.83	6143.83	5426.74	8352.72	5463.27	5430.36	5188.07	8900.8	8061.13	9473.2	4605.66	4512.61	4466.52	4872.92	3806.36	3381.62	3851.49	3659.71	3946.95	3879.38	5742.41	5537.31	4889.52	3943.23	3700.82	4147.84	3860.95
pos_1124	Norlinolenic acid	2136.32	2371.19	2305.54	2267.11	2196.4	2084.87	2282.61	1888.12	1838.87	1887.94	1505.94	1477.85	1701.25	1902.77	1944.1	1724.23	1546.86	1899.49	1286.99	1078.9	1600.68	1609.86	1673.86	1442.89	1946.18	1863.42	1600.63	1544.66	1882.43	2035.81	1685.5	1636.84	1309.53	1364.67	1754.7	1321.09	1149.03	1339.11	1386.13	1366.9	1556.06	1399.4	1522.92	1294.5	1463.91	1516.28	1525.16	1361.51
pos_1126	Campesterol	23176.1	30860.3	28299.4	32239.6	24721	25915.2	18593.6	31486.3	21155.6	25796.5	22645.2	22421.9	27022.3	27232.1	30049.2	26772.3	27104.6	27318.7	22164.6	14432.8	29709.3	25643.7	24551.2	21440.6	32152.1	31739.8	30118.2	20988.2	32961.8	32888.6	43680.1	38983.2	27267.1	35281.1	44523.1	26815.9	32878.6	40564.5	37066.2	36442.2	35971.9	36272.3	43495.7	37916.3	42126.9	42919.8	41984.6	27599.4
pos_1128	18-Nor-4(19),8,11,13-abietatetraene	544.742	715.877	711.244	723.841	535.431	523.136	460.258	673.928	444.512	570.744	523.27	480.17	618.546	647.829	593.662	648.384	547.863	594.742	483.105	352.425	607.116	564.737	557.573	504.463	726.741	643.956	622.855	517.142	656.123	682.884	606.738	532.265	371.681	484.03	581.679	423.03	484.057	524.597	481.681	483.703	488.587	486.595	633.032	506.243	629.67	614.372	525.503	432.231
pos_1129	27-O-Demethyl-25-O-desacetylrifamycin SV	365.17	458.792	360.73	418.173	22.8168	105.209	406.271	227.822	219.648	132.644	291.044	134.971	317.011	199.383	0.101969	13.8267	82.5444	26.7812	648.541	544.769	172.506	77.3902	222.975	317.5	428.271	183.416	2.25134	32.0946	142.997	79.6104	291.597	110.828	116.074	25.0493	15.5289	21.6283	137.147	135.258	43.2471	9.56658	11.8533	8.77353e-08	25.3223	0.000386794	1.71871	36.6965	3.28189	11.0621
pos_1130	Notoginsenoside Ft1	5779.14	6900.17	4758.92	7674.56	7900.31	8522.5	8686.04	8517.24	8348.58	6930.75	8152.9	9532.06	5097.28	6435.49	6784.98	4612.61	8308.55	7902.94	6840.11	11925.6	5692.98	6999.06	8714.78	6581.68	4543.62	4177.56	8208.01	6797.93	5525.92	4371.14	3971.4	3362.51	3666.58	3437.91	3041.69	3753.57	3893.92	3130.45	4605.05	3458.46	4791.17	5884.69	3366.65	2907.96	2726.69	2655.89	2338.78	2370.28
pos_1134	Neomycin B	6266.05	9016.47	7972.45	11639.6	3692.14	6244.28	5571.14	6707.49	4863.15	6677.84	11441.9	8673.02	9404.72	5639.49	3750.64	7406.69	5776.3	5705.48	12945.9	10556	9924	7169.65	8420.68	15388	10973.1	9390.39	5502.86	4568.03	10182.9	9141.72	7029.66	5854.55	5858.78	3421.46	6020.65	2569.4	6049.05	8416.53	6084.46	6023.45	2753.7	2925.72	3349.57	4173.18	3556.61	2774.89	3604.51	2268.6
pos_1141	Ginsenoyne J	427.607	612.169	568.437	616.064	490.184	437.929	400.082	460.16	402.107	437.901	362.886	353.572	420.455	464.474	480.687	470.03	359.669	451.593	296.051	249.768	391.567	382.773	441.75	365.217	513.769	441.309	411.642	363.315	477.832	558.638	355.795	287.351	203.376	238.175	327.005	207.652	204.328	234.674	193.729	249.855	217.372	242.112	293.921	222.218	262.287	239.783	225.106	220.641
pos_1142	17beta-Hydroxy-2alpha-(hydroxymethyl)-17-methyl-5alpha-androstan-3-one	9706.66	9356.91	8744.83	9640.38	9492.37	9815.34	11362.4	10757.1	11439.8	10396.2	9100.13	9080.54	9374.75	9721.37	11112.4	9731.26	9979.85	9745.4	8871.59	9364.36	10111.2	9780.12	9972.46	9461.5	10711.5	10798	10680.4	9540.19	10412.1	10657.5	11075.6	10381.2	10591.8	11015.8	10663.5	11472.3	9962.74	10165.3	10685.5	9886.34	9989.43	10538.9	10963.1	10080.7	10152	10838.2	10346.1	11019.9
pos_1149	Solanine	4410.11	4062.14	6058.45	6303.48	5247.94	3068.34	7438.05	5376.4	10394.7	5096.63	3514.83	7295.4	3676.8	3731.81	4847.96	11660.9	6087.59	3584.26	3195.3	2837.32	6140.12	4466.21	3080.1	6023.56	3319.11	6465.74	2918.87	3514.05	3702.92	16094.1	10585.9	6847.41	3054.35	3824.7	4418.35	6337.72	7674.14	3310.39	2471	4852.33	1655.38	2388.76	9814.91	11400.4	5116.19	10651.1	2531.47	6984.55
pos_1153	Prostaglandin F2alpha	6629.7	6919.57	5297.48	5027.02	6794.98	6850.27	6669.92	5553.72	19548.5	16519.7	4904.69	6077.19	4996.31	5677.43	26421.7	32035.2	5761.98	9944.45	3996.13	4415.58	14139.1	12780.1	6436.24	6988.92	6129.12	9445.39	7909.38	7287.2	8460.79	6772.33	4844.58	5960.8	6567.32	4681.23	5381.98	3770.49	2816.75	2690.67	3993.96	3512.02	2804.54	3347.72	4284.97	4012.56	2278.14	3566.43	3074.1	3123.71
pos_1157	Thiamine acetic acid	373.5	357.139	260.986	316.301	333.974	337.636	457.655	349.05	358.364	274.217	463.275	434.335	388.563	384.29	257.159	315.15	453.183	290.287	514.096	521.379	445.902	401.29	374.708	444.169	299.367	383.421	378.983	387.524	308.884	286.476	339.692	399.975	432.825	471.504	277.253	434.353	460.852	537.33	521.63	423.427	524.27	492.98	442.79	566.518	554.783	541.858	515.563	459.887
pos_1165	Morellinol	41972.2	49860.9	47262.6	48419.4	41166.6	49612.5	52030.2	53394	42818.5	48118.1	63493.2	62884.8	64000.4	48171.5	47037.1	49880.9	62966.4	49656.5	74452.7	75070.7	60912.4	57850.8	58710.1	68087.3	52289.3	52639	57056.3	61854.9	54922.8	53209.7	50110.1	52528.9	57585.6	60163.1	45595.9	62676.9	70476.2	64044.2	70628.5	62924.1	69133.5	68872.8	72456.5	73050.1	74543.3	72204.2	68530.3	71897.8
pos_1184	8'-apo-beta-carotenol	378.823	551.962	594.61	401.402	478.432	176.363	214.086	383.785	172.233	309.839	276.503	266.43	241.319	328.71	248.764	346.317	153.38	611.491	150.975	168.404	294.575	300.309	470.252	451.561	350.306	362.103	374.039	452.532	415.639	803.503	121.4	87.6271	95.4849	82.1995	263.621	146.677	37.0283	63.5355	51.7449	138.389	70.8996	80.3724	34.9206	59.9578	77.7841	67.7108	72.9344	215.157
pos_1187	cis-1,2-dimethylcyclohexane	168.776	167.739	144.987	153.559	268.022	174.627	359.487	148.565	202.677	513.228	96.5801	108.321	155.593	146.942	141.671	136.373	134.022	180.444	295.768	131.12	151.726	134.822	160.397	101.74	158.222	140.934	124.044	147.32	130.725	145.533	152.741	160.476	176.142	169.198	177.702	171.001	144.168	130.462	151.321	143.878	163.249	165.334	123.676	115.616	114.533	161.85	150.303	150.496
pos_1193	Clerodendrin A	1.11978e+06	1.22073e+06	1.39151e+06	1.51913e+06	1.0845e+06	1.27672e+06	1.45508e+06	1.30749e+06	1.25112e+06	1.319e+06	1.34232e+06	1.43039e+06	1.45067e+06	1.22738e+06	1.4731e+06	1.427e+06	1.41211e+06	1.2252e+06	1.75252e+06	1.77162e+06	1.37641e+06	1.35605e+06	1.32206e+06	1.53816e+06	1.41282e+06	1.28562e+06	1.3375e+06	1.42387e+06	1.38199e+06	1.37467e+06	1.44209e+06	1.32099e+06	1.30527e+06	1.40819e+06	1.23377e+06	1.5455e+06	1.75549e+06	1.48828e+06	1.64308e+06	1.49469e+06	1.66593e+06	1.68563e+06	2.01005e+06	1.66745e+06	1.70134e+06	1.70666e+06	1.67831e+06	1.63835e+06
pos_1194	Avermectin A1a aglycone	3852.01	5191.97	4259.35	4683.65	3663.3	4823.86	2413.64	5495.01	2752.98	3577.31	5082.6	4550.14	4806.8	4675.38	3169.24	4221.67	5325.85	4592.15	4470.89	3194.82	5933.52	5159.78	4741.33	4645.78	4742.07	4691.39	6407.62	3561.45	5338.56	4783.28	4568.56	4895.41	4325.42	4434.95	6149.5	3522	4863.05	5452.77	4192.81	4331.06	3890.98	4273.55	4928.84	5988.08	7078.91	5964.34	5758.68	2956.2
pos_1197	Obtusifoliol	49670.6	51247.4	63189.8	43984.2	61527.3	62359.3	29588.6	31588.5	20987.4	23349.7	34673.8	34761.7	26388.6	33795.3	23109	24137.7	20876.3	25115.7	23005.9	23640	29437	24529.5	22246.7	23471	28596.7	26707.9	27700.4	25359.9	24506.4	23166.6	21233.7	22954.4	26111.4	18804	24512.1	19798	22566.9	23387.2	32896.6	43668.7	50226.6	48378.9	52469.1	45011.8	47927.1	53302.7	49099.7	52340.6
pos_1203	Adipic acid	53.6186	49.3266	36.6933	51.8185	79.5569	70.5866	102.608	51.9787	76.1544	60.9995	43.4063	29.7005	52.1329	53.8296	56.7873	38.5782	45.8763	45.193	40.9762	40.3676	45.1129	41.1826	54.9931	25.742	44.7337	48.018	35.0323	34.628	41.0675	47.2804	58.24	59.0775	61.0472	53.9444	37.9109	47.7166	44.2292	52.8096	48.038	39.9885	35.6922	45.3057	44.0137	32.2947	32.2081	44.8258	38.374	39.4739
pos_1209	13,14-dehydro-15-cyclohexyl Carbaprostacyclin	504.982	537.59	563.805	585.779	510.695	520.222	579.677	489.03	504.523	476.974	507.517	500.97	525.642	517.768	545.04	529.817	453.731	463.905	431.321	470.697	503.651	521.609	506.075	539.024	530.013	511.388	523.948	601.911	547.527	553.152	497.896	481.912	497.666	437.475	457.334	442.679	444.472	432.169	451.915	411.505	427.334	436.713	434.371	407.763	407.25	400.782	382.121	455.435
pos_1210	beta-Tocotrienol	6986.23	9446.67	11149.7	9372.96	6464.16	7011.39	5559.53	8760.67	6169.96	7219.71	7358.8	7584.44	9007.1	7465.32	8417.86	9197.9	7576.25	7650.24	7645.72	7029.97	8953.51	7815.55	7900.99	9249.84	9644.16	9096.03	9098.72	9124.95	9675.98	10639.9	6756.08	6539.14	5268.33	5477.64	6726.73	5337.53	5742.51	5639.09	5332.05	6047.73	5584.98	5710.96	8048.72	5875	8084.89	7320.02	5761.19	6354.88
pos_1214	14(15)-EpETE	1677.9	1774.45	1645.47	1724.94	1778.23	1647.85	1972.58	1708.26	1674	1575.51	1494.18	1551.98	1528.94	1650.52	1643.3	1620.58	1465.42	1609.49	1431.5	1502.61	1578.83	1532.52	1681.15	1659.29	1598.74	1579.56	1690.27	1678.6	1614.47	1682.9	1435.82	1450.1	1529.59	1388.15	1468.06	1582.19	1344.38	1476.12	1428.27	1437.22	1443.12	1563.98	1342.75	1504.06	1374.09	1444.41	1329.81	1551.32
pos_1216	Δ17-U-46619	2080.07	2158.71	2119.9	2111.63	2158.91	1912.35	2381.62	2071.65	2089.38	2071.98	1914.33	1993.64	2013.22	1973.97	2086.16	1972.86	1884	1784.37	1836.04	2049.47	1845.19	1899.88	2218.5	1962.08	2059.43	2001.95	2078.57	2135.37	2016.81	1940.91	2038.33	1891.85	1970.35	1836.01	1876.3	1970.92	1859.45	1817.66	1913.2	1808.18	1697.63	1935.98	1900.86	1906.65	1611.7	1770.11	1671.03	1889.19
pos_1217	3alpha,7alpha-Dihydroxy-5beta-cholestanate	35700.2	35467.1	30498	34764.2	36181.7	40328.6	37660.9	43593.4	33683.7	35563.5	34264.6	37418.8	36285.8	39694.9	36571.4	33608.4	37651.4	30348.7	41315.2	42505.8	32846.3	31951.1	40906	38119.1	36165.7	32725.4	41504.5	40261.5	33148.4	31472.3	34186.7	29881.5	37262.9	31265.1	31573.3	37276.3	35890.2	32601.2	37605.5	32437.3	29922.7	38538.9	37276.3	32898.2	28009.2	33449.4	29429.6	39953.9
pos_1218	Hydroxychlorobactene	13321.2	12644.1	9946.11	12477.9	11829.3	11963.6	14550.1	15388.8	14443.7	13168.8	11627.1	12786.4	12238.6	13225.3	14300.8	12742.5	13477.7	10478.1	13198	17214.9	10885.1	11565.4	16186.3	13748.6	12961.9	12084.4	16459.8	16235	11596	10670.9	14862.2	13617.5	16238.4	13826	13339.6	16209.8	13910	13690.6	15314.4	11946.8	9528.47	14210.9	12121.7	12325.6	8971.18	11066.5	9350.75	14155.7
pos_1226	3-Hexenol	190.78	183.484	146.697	199.944	186.972	186.103	295.91	214.733	225.373	194.482	148.405	132.294	150.646	202.954	178.082	148.401	170.593	223.2	170.439	186.606	215.924	155.059	164.493	167.646	168.793	166.976	169.962	152.923	171.155	158.85	177.231	126.793	144.138	162.454	150.48	217.267	186.043	148.091	179.788	155.262	187.864	193.044	224.907	156.431	179.092	203.691	152.805	228.084
pos_1229	(Z)-beta-ocimene	1010.5	1077.91	1104.87	1004.13	1136.74	1190.33	963.283	898.954	718.925	697.081	774.46	800.948	734.228	940.987	690.88	687.552	678.552	787.244	707.026	768.567	758.029	616.891	736.959	765.867	780.172	707.995	809.417	766.355	759.332	704.489	707.917	622.379	724.39	613.473	729.202	756.957	753.688	664.536	869.276	883.568	1022.39	1076.77	1108.58	882.25	963.718	1063.11	968.011	1160.32
pos_1230	(Z)-3-Nonen-1-ol	494.472	468.578	315.118	648.366	463.589	508.826	884.242	623.493	688.774	620.832	368.047	306.468	311.526	624.341	490.537	419.824	467.334	718.763	478.101	524.018	789.59	390.057	420.428	453.873	397.842	487.051	466.774	393.103	450.257	417.074	422.615	240.86	313.168	396.727	349.455	691.794	483.429	374.379	507.872	355.948	512.003	509.709	670.406	415.897	480.807	562.486	345.571	697.366
pos_1231	5-Ethyl-3-methyl-2E,4E,6E-nonatriene	73.0566	77.5214	82.65	87.7124	65.5613	70.4889	113.271	87.2808	62.2397	66.068	37.0824	21.6176	23.0098	81.2279	47.6709	35.2718	39.8063	104.786	47.9928	60.7392	105.309	36.1704	44.4209	58.4656	47.1389	62.9184	47.0624	24.7813	50.1271	47.8603	37.008	8.93905	20.9903	29.648	23.8692	82.6597	54.3508	35.643	59.8376	29.1237	71.0291	74.7964	99.9371	47.0343	62.2712	86.0349	50.3834	92.8253
pos_1245	3-Hexenal	72.8313	81.4331	66.7529	92.4411	77.7487	81.1357	114.915	97.1672	89.5216	85.2278	61.2571	56.3425	53.5541	91.1854	71.8666	66.8152	73.4684	99.4947	76.4721	82.4855	102.927	62.088	72.2558	75.9131	68.3008	70.6611	77.714	65.5515	68.8437	68.2651	63.869	46.6357	52.1584	58.7661	58.1516	93.1469	76.5305	59.75	75.2182	57.8858	76.7652	81.377	103.074	65.9591	75.425	88.8963	60.7761	104.253
pos_1247	4,6-heptadienal	65.2455	74.38	69.5641	85.962	61.3574	47.0735	106.8	69.0981	92.8969	77.2696	55.4233	54.1925	49.6831	73.6004	63.5556	58.57	69.2001	89.3026	61.1916	66.967	96.6396	48.8736	61.6214	65.6747	54.1747	66.4879	64.8324	63.9557	65.8324	59.872	59.627	41.1583	44.5708	47.3787	43.4979	90.1128	64.9917	43.3234	67.9706	48.0318	71.246	66.9578	76.7769	48.7002	58.7703	73.378	55.7333	81.1624
pos_1260	Traumatic acid	5702.08	5651.72	5614.84	5663.04	5809.69	5558.16	7387.1	5600.74	6227.09	5402.91	4897.8	5013.98	5421.2	5570.97	5311.98	5031.71	5027.02	5163.59	4915.35	5224.9	4914.04	5125.31	5298.41	5063.15	5511.1	5272.12	5089.85	5354.56	5243.38	5432.02	5688.28	5562.21	5464.4	5188.02	5385.23	5541.17	5303.45	5296.52	5425.54	5072.83	5753.4	5769.62	5499.55	5223.58	5192	5426.36	5366.63	5514
pos_1262	L-Threonine	124.808	117.848	134.014	123.14	138.369	136.31	182.326	103.212	149.681	118.135	97.4997	107.562	110.094	113.057	129.494	101.187	102.077	103.451	91.5108	108.694	90.406	106.131	109.077	112.908	96.1546	100.575	100.874	126.309	112.795	107.785	121.469	129.478	138.922	129.935	123.916	136.045	115.561	121.338	127.645	117.332	148.466	143.213	109.546	113.824	113.751	132.78	126.289	134.265
pos_1269	Betulinaldehyde	1.05958e+06	1.46577e+06	1.46943e+06	1.41603e+06	873699	1.02961e+06	788752	1.3664e+06	785043	992182	1.13838e+06	1.10625e+06	1.33069e+06	1.16516e+06	1.16387e+06	1.24924e+06	1.31748e+06	1.17469e+06	1.2939e+06	966156	1.43137e+06	1.24246e+06	1.21898e+06	1.2884e+06	1.48682e+06	1.48591e+06	1.45479e+06	1.27591e+06	1.58564e+06	1.74989e+06	951414	931262	674967	701530	969004	622277	796373	870926	709856	912917	726769	684749	974013	954475	1.19402e+06	1.10776e+06	924512	778593
pos_1281	(2'S)-Deoxymyxol 2'-(2,4-di-O-methyl-alpha-L-fucoside)	46111.6	50177.9	56699.2	63749.5	61976.2	53954.3	50889.6	52127.6	58795.9	72940.8	51029.2	44328.6	48255.9	49020.9	60138	47583.6	50659.6	46588.2	48904.6	48537	35360.8	54105.1	46731.3	42240	56684	63295.9	48125.1	49245.4	48612.9	55660.7	46796.6	57826.5	52177.8	50313.6	54581.5	54921.3	40891.2	66523.2	53630.7	50616.4	59214.8	55800.3	62013.4	68033.3	55041.6	61935.4	50228.4	60610.1
pos_1284	Erythromycin	139410	165280	91297	92595.6	240531	212901	149310	152390	100291	92988.2	183723	174507	146896	151796	114385	143724	168846	171889	144518	144017	143002	180282	127566	128162	176053	217809	155378	169315	157351	188979	142878	261646	196833	180835	207851	245098	112449	329551	209046	221793	245623	237827	121446	333757	223906	213941	209008	196783
pos_1295	4,4-Dimethyl-5alpha-cholesta-8-en-3beta-ol	31543.3	31993.4	12594.6	13785.8	9931.72	9638.82	46342.6	19238.8	29082.7	11616	11603.3	9272.8	19825.3	19510.1	13734	13955.8	21264.9	21303.6	31064.9	16835.1	26027.9	23705.9	15242.3	22507.2	21332.7	12539.5	11224	27828.6	12706.5	12404.5	32058.6	17645	13285.3	36760.1	11759.6	11235.7	16598.9	10954.8	9642.99	25904.8	12470.2	8429.44	21980.5	18123	9119.74	10656.5	10151.5	9712.77
pos_1300	3alpha,7alpha,12alpha-Trihydroxy-5beta-cholestan-26-al	8776.73	7823.49	5899.58	8186.98	7879.02	9920.28	9571.89	11664.2	9624.15	9425.56	8490.74	10378.1	8158.07	8632.21	8977.96	8016.38	10331.3	7600.5	9609.51	11964.2	7195.04	7618.63	11353.2	11010.4	7792.28	7931.12	10892.1	11196.1	9084.48	8148.55	8338.65	7747.82	8298.58	8416.58	7489.52	12799.6	10943.7	8407.18	10454.8	8928.86	8328.23	11212.3	10127.4	8250.23	6506.2	9169.14	7797.91	11943.5
pos_1301	Zeaxanthin	147008	114838	91475.4	140394	139194	175335	169322	193174	180408	170795	145421	176225	128613	143355	158578	136370	180320	127484	159636	208928	123580	133518	195883	181084	125569	139022	188700	190838	152336	131886	148414	143857	150703	155339	133258	227435	195469	154097	192955	159685	147956	203337	181343	151251	111382	163744	137798	214373
pos_1305	DG(18:4(6Z,9Z,12Z,15Z)/18:1(11Z)/0:0)	47563.4	46851.1	48650.7	53271.2	56265.9	45244.4	74672.1	36671.6	50043.4	40500.2	49186.2	49263.4	41126.7	48533.1	67982.5	46385.9	45168.3	46103.3	54234.5	56810.3	55845.5	50698.9	61224.3	45847.6	48819	46443.6	62598.2	50564.3	51715.3	53294.4	39664.4	34311.8	44732.5	37429.6	34223.4	35619.5	37478	38144.7	41523.2	35305.7	43281.7	53857.5	45729.8	35858.9	32565.8	44912	37514.1	53901
pos_1313	Octylamine	1936.98	1707.64	1720.76	1806.86	2104.77	1944.66	2642.91	1635.39	2258.39	1856.52	1551.55	1561.87	1624.14	1733.99	1747.52	1549.88	1670.93	1658.18	1380.7	1544.59	1471.97	1643.31	1713.77	1554.16	1610.2	1711	1567.84	1724.56	1619.98	1731.05	1852.86	1953.96	2016.07	1892.64	1909.71	1984.3	1713.17	1778.28	1900.33	1699.75	2047.76	2054.46	1654.32	1722.1	1726.03	1837.85	1845.86	1909.12
pos_1315	2-Methylpropanal O-methyloxime	772.366	819.215	865.75	894.466	925.96	854.602	1055.69	838.447	927.553	896.659	791.619	841.593	840.721	837.396	1024.15	1050.53	701.087	886.642	805.833	845.535	830.86	857.462	742.495	871.053	946.61	801.848	786.722	871.023	872.686	912.701	905.373	836.207	968.025	842.114	903.602	988.135	837.612	808.218	861.525	841.554	935.76	895.703	887.065	875.098	797.716	857.932	814.187	862.58
pos_1316	Coniine	99.172	83.5749	86.2737	93.0067	102.333	94.6883	107.274	75.2279	102.3	88.3889	89.5682	79.9546	69.0725	70.4056	88.8505	78.2366	85.8111	85.8778	71.9357	65.758	80.9249	80.3289	87.713	80.0532	72.4407	89.0478	73.0401	81.1761	85.0753	85.8643	86.4637	103.134	101.951	100.163	95.4125	107.135	83.9055	92.5153	100.794	96.8947	107.372	107.634	78.3038	91.2276	93.8614	95.8256	103.82	94.0758
pos_1319	Icosenoic acid	898.632	744.032	1471.85	1468.5	1934.65	1538.15	1312.11	680.202	1725.52	1511.15	1322.3	1276.7	767.339	786.507	1584.21	1438.06	1244.18	1331.27	828.924	796.742	1374.91	1367.38	1374	1167.88	986.655	1379.59	1248.63	1397.45	1330.76	1399.98	1156.05	1607.19	1569.03	1628.29	1468.06	1549.68	946.774	1484.63	1563.67	1475.45	1856.44	1612.23	1063.41	1487.53	1392.41	1512.13	1415.99	1435.84
pos_1326	Glyceraldehyde	453.629	445.597	412.844	409.502	462.326	450.631	578.268	439.95	440.768	393.591	388.218	376.515	429.875	448.005	376.111	357.301	400.05	411.203	396.325	399.83	363.538	365.697	401.969	401.883	442.08	392.825	393.181	428.158	426.054	423.768	460.018	418.47	431.121	433.369	419.439	440.974	447.216	405.092	430.01	407.097	476.52	448.986	418.832	392.827	423.995	445.308	425.037	435.029
pos_1327	N-Ethylacetamide	664.238	661.113	694.906	701.504	736.427	707.426	845.657	657.793	737.282	674.186	629.929	671.2	659.421	675.196	721.733	693.698	593.209	690.524	618.591	649.191	611.184	638.368	625.129	691.582	713.317	624.748	627.782	688.603	684.952	730.524	711.556	651.942	718.768	659.148	701.767	741.591	659.715	629.916	664.381	654.656	739.235	732.33	682.429	659.733	659.046	678.826	689.195	706.403
pos_1349	PE(P-18:0/17:2(9Z,12Z))	4292.82	4169.95	4648.48	5415.23	5407.43	7119.42	5659.13	7920.03	6504.49	8918.2	4320.49	4671.76	4898.12	6032.2	7054.81	5364.84	7992.24	4814.43	6630.82	5105.13	5326.44	4700.26	5756.5	4944.7	6584.08	6589.84	8724.47	4382.54	5261.99	5468.26	4558.1	4149.48	7351.63	4636.61	4227.54	4880.61	4435.89	4110.9	4655.41	4550.43	4951.49	5509.6	5459.75	4659.72	4329.99	4810.76	4398.36	4824.22
pos_1351	Kanosamine 6-phosphate	406.819	408.833	370.151	459.824	338.299	328.285	612.635	399.479	394.348	333.021	287.878	287.881	468.19	464.329	388.253	266.831	297.669	289.552	319.502	336.05	291.437	275.516	298.479	314.793	356.027	303.11	290.8	295.611	327.67	326.475	394.732	311.999	263.326	283.971	328.484	344.157	382.476	284.715	305.359	293.954	339.748	330.495	455.744	278.91	296.411	355.284	319.376	311.296
pos_1371	3b-Hydroxy-5-cholenoic acid	6408.54	4196.56	3849.85	4480.02	4775.06	3857.56	6705.25	5004.17	5879.34	3752.44	3008.38	4001.04	4530.82	4248.9	6168.88	4878.56	3913.99	3459.09	5819.55	4947.68	4405.73	3866.86	4006.91	4248.12	4017.41	3446.41	3859.67	4047.45	4850.4	4557.66	7247.85	4977.09	4479.56	4619.46	5027.6	5278.93	4050.33	4415.23	4234.59	4204.09	3687.91	4583.33	4031.15	4396.93	3934.84	4165.17	4151.16	3628.52
pos_1387	Indolin-2-one	24.9129	21.7092	10.7361	23.2129	26.6364	23.986	27.9219	18.8159	9.52176	7.75094	20.8338	14.6167	16.8761	11.2101	14.1542	21.5844	9.09894	27.3506	24.9946	24.7798	26.6512	24.5605	28.2253	16.9136	17.3529	12.194	10.7641	26.8915	12.4466	19.7784	15.8063	17.8802	27.189	43.693	18.0361	23.662	8.6687	23.2592	9.67024	12.6387	37.9847	34.8567	8.9659	30.4611	20.9852	16.7296	22.2898	26.0333
pos_1561	Sulfate	15694.7	15866.1	15731.5	15773.3	17110.1	16221.9	18954.8	15902.7	16277.3	15237.5	14976.8	14923.8	15856.3	15522.3	15683.2	15219.1	15456.7	15711.4	15057.6	15194.4	15324.8	15249.7	15687.2	15426.1	16296.3	15465.5	15861.4	16251.6	16339.3	16901.6	15986.1	15457.8	15722.2	15306.1	15766.8	16155.1	15157.6	15183.4	15445.1	14899.4	16627.3	16676.8	15341.4	15361.2	15520.9	16125.7	15817.9	15977.1
pos_1598	2-Amino-3-oxo-4-phosphonooxybutyrate	7063.51	7615.63	7208.01	7198.8	7736.23	7584.1	9671.35	8072.42	7555.13	7101.74	6746.69	6804.9	7928.13	7856.49	7308.36	7089.36	6993.69	7091.31	6798.27	7014.16	6968.02	7043.28	7116.56	7051.74	7400.82	7130.32	6984.87	7460.19	7306.54	7573.21	7158.84	7160.51	7148.18	7004.95	6975.91	7189.95	6612.97	6821.86	7038.77	6712.19	7532.71	7645.84	6991.85	7050.54	6821.06	7273.21	7014.64	7170.43
pos_1599	Clavulanic acid	11886.9	11934	12080.7	12010.2	12851	12425.5	14868.7	11931.2	13195.5	11984.7	11294.9	11122.4	11368.3	11231.6	12207.6	11725.9	11520.9	11452.2	10903.2	11260.5	11740	12119.9	11890.3	11263.6	11600.8	12072.9	11695.9	12058.1	11583.6	11816.7	11358.5	12105.9	11751.8	11712.2	11152.9	11501.2	10428.2	11265.2	11627.5	11103.5	12033.9	12386.8	11128.5	11696.3	10975.9	11655.5	11102.2	11601.4
pos_1602	3-Sulfino-L-alanine	3393.7	3493.45	3431.72	3470.2	3726.26	3597.73	4475.19	3630.52	3756.03	3484.95	3242.25	3259.66	3495.52	3478.29	3522.68	3450.21	3304.11	3368.65	3176.16	3279.72	3403.75	3422.9	3393.1	3312.89	3434.62	3393.09	3362.45	3525.88	3444.89	3510.62	3350.84	3397.69	3387.76	3329.23	3265.62	3389.21	3027.02	3272.52	3370.3	3165.4	3542.21	3625.96	3211.81	3311.49	3208.35	3392.08	3288.21	3375.91
pos_1604	(S)-3-Sulfolactate	24325.4	22930.9	24287.4	24366	26008	24486.6	27457.7	21922.2	26203.1	23901.5	22307.6	22430.9	20790.4	20627.8	24157.5	23223.2	22731.3	23042.7	21255.4	21471.4	23807.8	23838.8	23556.6	22363.6	22591.2	23894	23451.4	23714.5	23572.1	24098.9	22116.6	23831.7	23499.5	23080.1	22886.9	23261.9	20799	22839.4	22976	22506.1	24054	24507.8	21404.1	23303.4	22501.9	23673.5	22693.5	23326.6
pos_1612	Ala Cys Ser Glu	2835.31	3878.22	3399.11	3697.51	2522.6	3103.44	2213.47	3470.15	2004.54	2868.01	3568.19	3774.71	3404.68	2659.43	3420.59	2916.34	3406.3	3253.87	4420.49	3890.71	3465.95	3307.82	3878.35	3764.49	3163.39	3084.26	3225.7	3018.44	3353.77	3494.6	1241.92	1248.21	1604.7	2005.57	1401.31	2462.92	1692.18	1532.27	1668.62	1643.86	2730.48	2264.2	2406.69	1746.67	2222.05	2431.74	1964.28	2651.21
pos_1617	Glucoiberverin	31.8615	90.6793	91.7296	92.6446	143.44	133.064	78.3353	173.709	122.179	122.363	69.9745	71.4279	173.325	148.902	60.8255	119.792	128.768	135.532	52.484	58.6091	59.2639	56.2199	41.6589	33.5931	99.6592	92.3504	83.3122	152.31	168.965	134.531	98.9488	69.8041	89.2203	124.503	97.877	140.019	127.714	123.153	139.903	123.374	134.064	110.513	141.052	144.441	115.978	143.883	157.699	113.102
pos_1618	2-Aminovalienone	1212.94	1587.1	1776.73	1495.23	1145.55	1253.13	994.353	1562.19	1338.32	1463.61	1202.45	1184.01	1629.34	1516.13	1300.34	1407.67	1443.71	1630.16	1185.3	1094.5	1297.63	1201.55	1109.66	1257.61	1367.89	1242.59	1163.38	1896.41	1952.44	1796.47	1127.48	923.779	1272.48	1959.03	1289.78	2067.54	1517.68	1759.04	1760.5	1540.91	1244.01	1089.49	1177.41	1350.13	1266.87	1197.39	1552.85	1187.83
pos_1625	D-Glucose 1-phosphate	83.0204	65.6817	44.6739	60.8514	99.1757	99.5945	223.82	91.3166	103.69	97.4703	79.7799	58.3564	79.3309	91.4233	99.7873	62.5149	73.743	67.1142	101.97	112.746	73.6572	89.3607	77.7476	69.9269	86.5552	72.6549	93.7381	54.6183	38.659	39.3595	68.0832	56.7156	33.4317	56.2595	37.9973	44.7933	30.1818	56.1425	47.1664	30.0087	89.5841	96.9234	69.3761	44.9634	65.0266	78.1574	47.03	68.8291
pos_1637	O-Acetyl-L-serine	3021.33	3422.25	3495.4	2942.34	2555.12	2662.92	2039.99	2961.4	2745.77	2819.23	2993.89	2914.17	3170.17	2909.6	2859.23	3026.98	2648.34	2993.78	2894.42	2785.46	3197.64	3005.83	2851.37	3222.22	3214.16	3034.74	2860.85	3016.48	2811.91	3400.97	2333.6	2379.44	3717.2	2882.16	3060.11	3217.22	2898.29	2646.96	2731.67	3047.47	3480.2	3056.22	3600.43	2807.28	3660.45	3717.42	3192.07	4015.57
pos_1643	Itaconate	232.64	619.34	572.365	561.377	237.321	273.662	170.94	288.65	104.427	283.151	185.584	228.01	274.422	275.706	341.622	219.967	239.975	263.273	269.468	280.058	212.255	251.991	235.963	270.327	299.641	249.465	306.451	334.696	274.814	358.022	14.6826	21.4601	4.08017	11.8563	8.54694	32.281	11.7069	12.4115	10.4074	13.9062	99.5347	97.0525	86.3003	14.0499	112.695	107.433	18.9064	104.604
pos_1644	cis-2,3-Dihydroxy-2,3-dihydro-p-cumate	917.892	995.152	1085.87	877.277	852.167	858.178	847.209	922.707	871.482	876.313	855.796	862.35	949.542	878.084	962.891	890.133	763.387	828.982	850.325	860.918	934.64	917.936	837.053	973.999	924.467	861.486	808.79	909.393	788.333	914.358	732.417	714.872	833.837	670.538	700.331	684.863	787.529	668.91	722.516	775.251	790.038	785.306	752.508	677.455	820.448	791.713	759.828	773.23
pos_1658	Indoleacrylic acid	15227	4732.5	6924.13	11686.7	12068.5	7362.27	15164.2	2497.14	3882.81	2179.3	9807.46	8941.96	7974.64	10086.2	3749.39	7553.02	4745.58	7971.05	7636.66	3305.23	2802.57	2462.28	2378.38	3970.31	2440.3	2191.1	2162.3	7588.56	4935.67	8779.48	2949.5	2433.23	5025.39	17814.3	2633.45	4086.31	1498.61	3332.86	1678.05	1975.82	5209.25	5312.93	1856.04	3623.86	6001.99	4821.27	4158.38	6161.48
pos_1669	Hispidin	4293.33	5575.35	7004.5	4398.18	3031.49	4747.16	3182.02	5068.86	4837.69	4528.32	5315.48	7958.82	6343.62	3779.53	6466.63	4332.55	4491.25	4051.33	7106.73	5051.39	5574.54	4632.99	5289.49	7240.65	6118.24	6572.21	5318.23	8718.16	9152.06	7004.31	14648	13949.3	12941.1	11208.5	14937.7	6860.34	18080	17381.7	17693.4	15382.9	9128.32	10403.6	8058.99	17209.3	9807.72	8179.24	15693.7	6322.49
pos_1670	7-Hydroxy-6-methoxy-alpha-pyrufuran	25603.5	36483.6	45543.1	27483.8	17839	31130	18951.1	34607.2	32097.2	30025.3	35986.4	55944	42193.1	23077.3	44457.7	27022.9	30502.1	25111.7	49700.7	34669.7	37192.1	30305.4	36624.9	50090.8	41164.8	45832.7	37178.2	61754.5	64318.2	47790.6	104578	102666	91221.8	79941.6	104532	48023.6	128471	126480	127874	111084	66884.9	76904	56024.8	127585	69510	59188.7	112842	44997.4
pos_1677	p-CHLOROPHENYLALANINE	134502	132692	132133	136579	128770	122517	157758	131785	142222	126275	120359	120521	126064	122318	132854	135020	124887	122377	120982	123358	122695	121974	130398	122671	127597	126295	134915	128407	131122	126528	126405	125850	109738	119733	123459	117694	121011	124947	124686	120804	126975	138582	120692	126019	121088	128434	124244	134774
pos_1678	8-Methoxykynurenate	45916.2	44710.8	43769.8	46333	44283	41960.5	54624.4	44423.8	48954.8	42601.7	40512.8	40257	42056	41549.5	44345.1	45619	42440.5	41740.8	40185	41597.5	41609.2	41679.9	44150.4	41264.9	42786.7	42856.7	45856.7	42953.2	44144.3	42896.7	41821	42314.8	36693.5	40617	41112.3	40665.3	39450.1	41602.1	41438.8	40153.1	42968	47125.8	40803.7	42094.3	40971.8	43843.2	41568.4	46277.9
pos_17	1-epi-Valienol 1-phosphate	10181.5	11607.7	10037.8	10094.5	9978.52	10388.4	14230	12336.9	11195.3	10203.5	9477.65	10307.8	11529.2	12180.1	10145.8	9760.84	9232.55	9584.95	10144	10215.6	9777.24	10138.9	9185.72	9370.88	10734.5	9321.51	10624.2	9882.1	9468.81	10016.4	10655.8	9412.27	9384.81	10054.1	10541.5	9923.33	10840.9	9159.72	10067.3	10511.7	10735.4	10281.3	10095.8	9376.39	9691.34	9948.2	9555.09	11069.5
pos_1705	Indoxyl	179135	174720	170131	189987	194967	171172	247314	178145	207242	173688	157089	152707	165591	173003	178117	179130	170414	169525	163925	180217	159475	166018	173572	163488	173647	162615	177047	170101	171716	172428	151743	146475	132123	152585	141169	169597	138530	136005	136684	136982	175937	188198	168598	145925	156225	174535	151410	192985
pos_1707	Humulene	408.71	621.043	771.862	534.153	315.639	357.678	284.191	441.079	283.096	394.474	489.969	436.573	526.653	413.961	464.828	424.211	344.202	400.584	406.197	448.239	431.615	416.556	449.995	620.843	409.85	322.047	377.296	541.318	461.491	545.784	186.98	187.843	151.236	252.485	362.624	501.471	317.933	287.804	206.322	210.473	207.668	139.836	233.457	230.6	1534.36	317.933	270.283	293.649
pos_1708	Deacetylisoipecoside	3027.79	3487.36	3563.93	3485.54	2360.65	2115.24	2548.48	2531.48	2329.85	2497.72	2361.96	2259.09	2583.49	2351.1	2988.06	2676.39	2365.44	2426.17	2573.96	2671.64	2835.7	2726.52	2730.14	2968.84	2740.96	3011.18	2638.57	2701.87	2556.83	2911.89	1969.07	1714.93	2466.89	3538.06	2332.77	2461.63	2328.41	2695.91	3064.27	2414.64	2032.71	2052.32	2432.76	2265.68	2536.2	2166.62	2419.76	2211.22
pos_1720	1D-1-Guanidino-3-amino-1,3-dideoxy-scyllo-inositol	216.908	215.109	218.093	182.981	101.651	91.9631	125.645	179.05	108.538	150.663	256.42	197.002	194.267	176.287	146.452	145.579	123.016	193.57	184.437	204.364	256.876	207.013	239.657	242.014	204.22	154.82	111.558	114.817	150.797	190.035	51.474	25.0679	49.3468	23.5101	38.5944	30.619	50.6936	43.5443	27.9995	37.7141	46.5011	43.9989	38.2812	25.5099	37.2301	54.8886	50.0351	49.2651
pos_1722	Demethyl-desacetyl-rifamycin S	10520.6	8297.55	8763.69	7860.43	7240.37	6379.74	4908.94	9216.81	3368.7	8332.11	13840.5	8353.72	9822.59	10203.1	6788.19	9932.88	6372.34	9989.73	8820.75	10760.2	15439	12537.3	11501.3	9986.13	11257.8	8401.24	8051.97	6069.56	7585.29	10115.5	4034.43	3216.66	1813.13	2009.92	3909.17	1748.38	2920.45	2524.49	2291.99	3766.99	3594.66	3651.44	3356.5	2376.19	4365.74	2955.09	2229.3	3498.54
pos_1723	Pelargonidin 3-O-rutinoside 5-O-beta-D-glucoside	11472.5	19288.1	28731.4	20567.1	8296.22	9531.82	4462.06	12123.1	5775.2	9466.48	8002.11	10061.5	12680.4	10786.2	11714.2	10369.5	10153.6	10632.4	10087.8	8381.47	15345.7	14881	9696.31	11976.3	12556	12799	13186.6	16843.7	15849.9	18935.6	8399.59	7515.62	9238.82	13826.8	8975.96	8976.93	10011.4	10717.8	10347.2	9939.06	10067.7	9572.31	6817.26	10307.6	9952.52	8424.35	11202.8	9568.97
pos_1728	2-Hydroxy-2H-benzo[h]chromene-2-carboxylate	1057.52	1285.5	1353.98	1022.02	884.01	1124.77	799.337	1086.37	922.494	1113.38	1248.63	1606.86	1354.5	1048.78	1213.46	1077.27	1087.57	1139.12	1392.51	1048.56	1198.69	1005.24	1176.69	1430.98	1340.45	1327.79	1160.04	1514.99	1598.99	1418.44	2142.22	1917.62	1759.56	1648.53	2165.5	1081.91	2374.08	2287.13	2441.89	2065.51	1479.62	1555.18	1297.3	2183.07	1549.35	1317.28	2183.36	1068.41
pos_1730	C20817	337.437	410.597	426.313	313.992	248.591	338.733	282.602	389.781	403.151	362.486	369.981	498.83	413.939	296.268	383.549	299.247	343.683	297.649	457.061	352.808	381.463	310.761	374.615	466.369	398.827	409.748	362.435	494.021	498.356	449.005	703.134	636.365	556.949	565.649	649.779	379.764	896.08	801.586	923.673	688.253	559.321	577.743	499.813	800.437	538.911	494.201	789.85	389.708
pos_1731	Formononetin	2939.67	3470.02	1944.81	1969.25	2960.52	3261.07	1396.71	2829.85	2232.94	3684.65	3040.47	3842.06	3178.24	2800.56	3410.32	3103.38	2691.81	3239.91	2490.48	1576.39	3207.09	2468.79	3086.18	2626.85	3809.92	3850.38	2639.16	1976.42	3191.77	2529.83	2095.21	2564.49	4023.45	3996.54	2360.88	5483.81	4184.62	3457.9	4716.6	3570.2	4671.01	3146.33	5603.15	4302.78	4201.94	4409.88	4355.36	3418.33
pos_1733	Aspalatone	39293.7	55955	66798.8	42432.5	30167	46857.6	34142.3	55485.1	48549.6	44938.9	51685	82753.1	65171.9	39463.4	62050.2	39044.1	45624	39984.3	72213.1	54093.6	52670.5	45223.8	50433.8	74013	60971.1	63514	54174.5	90019.7	90951.8	72406.1	180223	161449	131026	120029	182694	71979.6	183992	170812	182257	156242	100384	115860	83482.5	172670	103208	86863.7	166700	71167.1
pos_1734	10-Hydroxydihydrosanguinarine	19853.8	24294.8	12343.1	12428.8	19880.6	21743.9	6623.91	21262.5	14710.7	28383.2	18257	26445.2	21118.1	18059.2	22755.8	23032	17473	21681.3	13999.9	7314.47	21025.3	15632.3	18787.4	15014.7	24655.6	25961	16812.8	9657.82	19613.9	14599.9	11621.8	15400.1	27574	25946.6	14338.6	34341	26599.4	20352.2	29462.4	21601.5	28819.5	17406.9	34399	25586.1	25819.4	26018.6	25702.1	18584.5
pos_1736	S-(Indolylmethylthiohydroximoyl)-L-cysteine	11136.1	12487.1	8295.78	7826.92	10917.5	11239.3	5254.84	11510.2	9997.25	14026.5	10154	12918.5	11580.6	10257.2	12024.6	12110.4	9400.47	11541.1	8309.87	6128.64	11461.3	9448.27	10541	9305.73	12896.2	13058.4	9815.61	7274.45	10494.6	9355.57	8494.58	9242.51	17323.7	14353.8	10216.9	17778.3	15672.3	12018.1	15479.1	13740.2	18438.7	12627.2	20937.4	14586.5	18021.5	19286.9	15555.6	17356.8
pos_1740	Catechin-4-ol 3-O-beta-D-galactopyranoside	4011.53	5246.97	5015.52	2513.99	3255.31	4128.85	1793.02	3241.46	2674.41	4418.24	5761.26	3292.93	3616.39	2452.19	4410.53	4299.43	3367.93	2128.56	2128.64	2812.27	2462.17	2531.91	2696.97	3006.25	3792.86	4315.72	3602.66	4735.46	10118.5	3106.53	6635.25	5375.12	5200.33	4376.31	16961.3	4797.17	8136.45	17766	9215.93	6528.46	2429.96	2390.52	7364.01	4362.38	1660.58	2061.67	4877.65	2483.4
pos_1741	Catalposide	4725.34	5506.93	7463.49	5108.65	3720.74	5380.63	2944.14	5009.29	5457.91	5434.37	6086.23	8605.3	5635.89	3736.22	6631.47	4784.09	4963.59	4843.01	7188.35	5303.17	6448.48	5355.91	5720.69	7549.29	6023.01	6704.77	5716.39	8603.05	8254.33	7484.84	12689.8	12459.3	9651.11	10354.1	12496.5	6042.52	13712.8	15074.8	16210.9	12573.6	8703.28	9785.18	6675.12	13812.9	9332.5	7862.5	12988.2	6028.87
pos_1749	Pollenitin 8-butyrate	1999.49	2323.11	2539.25	2019.38	1653.16	2004.1	1675.37	2238.86	2000.37	2069.41	2306.33	2791.84	2525.03	1929.55	2331.15	1917.95	1911.16	1975.1	2722.5	2275.67	2343.15	2014.84	2232.75	2705.19	2421.39	2387.59	2110.82	2791.44	2739.11	2641.51	3774.12	3257.81	2911.21	3097.23	3592.35	2142.44	4435.34	4029.21	4514.89	3655.36	2808.24	2967.05	2577.34	3789.42	3085.49	2639.98	3753.45	2181.71
pos_1753	N-Acetylpuromycin	12267.8	10571.8	11414.8	8695.5	5817.82	6988.46	6078.59	7810	5847.75	7495.47	10816.6	11489	10940.4	7873.36	14216	8521.34	7650.48	7857.34	9441.35	7584.32	8768.16	7719.47	8039.02	10083	9426.6	9495.46	7492.46	9678.09	10068	9756.4	15620.8	11804.8	16077	18873.8	15124.3	10969.8	21079.1	21492.5	22883.4	20554.6	10241.2	9459.03	9088.18	14875.3	11793.1	8942.17	14586.8	7270.77
pos_1754	Chavicol	98.1757	85.5837	118.026	87.2696	79.6178	70.4486	39.7765	68.9354	28.5064	93.5255	229.243	116.557	85.8796	81.4314	49.4182	86.041	59.1642	118.19	94.7781	131.614	168.339	135.942	158.729	145.258	90.0986	80.3345	47.9185	50.8226	73.8242	113.735	21.6904	8.34462	9.90472	3.77431	22.7792	19.1511	8.64313	4.24312	3.37451	14.7541	10.8694	18.3854	21.5878	0.511357	20.7784	14.0042	2.82752	15.276
pos_1755	Ethyl vanillin	5447.18	5436.01	4740.86	5727.26	5750.14	4140.44	6071.99	3409.59	5141.82	3931.12	3589.51	3758.38	3544.85	3666.42	6145.07	3708.04	3307.42	3673.42	4566.94	4895.93	3510.56	3473.83	4393.09	4512.75	3788.2	3599.09	3622.62	3668.45	3461.18	3526.18	1736.3	1586.69	1682.44	1894.58	1830.4	1992.62	1549.25	2019.21	1868.72	1674.62	2159.57	2381.67	2275.6	1802.51	2154.54	2170.52	1843.62	2593.13
pos_1756	Asperuloside	1524.45	1748.9	2087.2	1583.19	1149.68	1282.38	1208.09	1383.13	1388.39	1443.21	1280.66	1482.23	1710.92	1397.74	1727.75	1421.14	1185.56	1236.95	1365.7	1423.74	1356.02	1261.95	1406.46	1387.77	1525.62	1416.5	1308.11	1599.07	1461.77	1434.54	1972.96	1617.72	1260.19	1342.61	1773.17	1017.87	1730.6	1713.88	1841.45	1587.96	1285.03	1387.41	1206.87	1392.36	1356.44	1319.64	1398.07	1328.49
pos_1764	Astragalin	62790.5	43037.1	74480.6	39936.5	37906.1	34750	26047	92742.7	31502.6	47335.4	37022.4	45591.7	99063.6	90379.9	69707.4	58113	52883.8	78026.1	47090.2	42742.5	115196	175164	65868.2	118367	115846	109470	92996.5	123371	91976.7	198452	178935	336179	560930	374988	373164	516507	186392	109892	121512	447440	235490	187671	168763	286457	249994	193143	475525	274620
pos_1769	alpha-Ketocaproic acid	475.351	554.033	576.781	554.994	442.484	472.549	435.257	405.035	327.606	444.531	498.113	453.72	476.743	445.66	506.71	444.99	446.224	527.465	512.405	526.189	443.422	431.635	523.553	500.961	463.928	417.944	437.763	445.788	423.966	462.526	189.941	179.991	197.798	218.064	206.36	235.532	195.686	209.397	189.868	193.606	265.779	268.846	249.746	184.363	238.876	241.375	189.298	275.008
pos_1771	Isoquercitin	922.332	834.915	1161.85	687.726	590.757	762.831	373.903	936.116	868.343	799.205	786.404	1521.01	1153.12	810.196	829.413	898.446	845.634	776.201	815.403	543.212	863.561	778.505	613.137	987.207	863.119	878.969	820.707	965.884	728.054	905.982	20794.4	15064.5	12415.3	4463.24	18230.7	1328.87	15568.6	20052.9	22145.8	13705.6	1512.39	1625.35	1268.04	5936.77	1816.6	1042.41	4397.51	992.605
pos_1775	Quercitrin	515.094	499.44	694.131	400.571	292.664	342.154	328.166	431.084	440.792	344.086	487.518	795.58	566.179	374.432	397.71	375.586	324.415	357.949	417.804	359.211	424.885	366.097	340.426	589.335	420.373	416.546	375.747	536.387	396.771	526.249	10156	6506.44	4231.91	1898.12	10199.8	947.42	4281.76	5505.31	6789.86	4948.79	722.965	1009.18	552.132	1797.36	766.234	473.718	1604.66	515.27
pos_1783	OPC6-CoA	2701.22	2144.5	2301.17	1861.6	1818.26	1689.56	1760.53	2129.01	1621.23	1899.35	1944.96	2130.21	2774.43	2390.86	2307.76	2259.33	1988.15	2496.39	2261.13	1779.32	3345.15	2971.4	2125.29	2881.15	2729.08	2622.67	2558.2	2411.37	2281.07	4087.5	5272.36	4738.31	4556	5965.01	5013.51	6357.79	3488.3	3665.98	4655.35	5135.54	3737.59	4780.72	2836.21	4090.33	4243.69	3063.57	4623.89	2697.7
pos_1785	10,12-Tetradecadiene-4,6-diynoic acid, (E,E)-	6773.46	6410.1	7085.31	6713.57	5267.51	5435.8	5933.66	4531.75	4466.5	5657.25	5591.71	6602.74	6108.91	5159.8	6693.74	5423.15	4792	6197.62	6223.55	6917.76	4736.83	5475.33	6342.62	5630.34	4874.07	4797.15	4570.59	5519.58	4660.58	3853.09	2297.73	1608.27	3058.11	2586.22	3152.07	3101.89	1447.18	1948.64	1851.9	1363.94	3085.89	2646.26	2578.76	1712.04	2127.21	2301.8	2186.12	2436.68
pos_1787	5-Hydroxyindolepyruvate	5104.14	4768.09	5011.9	4643.58	4032.3	4389.59	4642.39	3806.9	4018.61	4435.05	4606.43	5197.39	4445.25	3947.4	4876.12	4167.06	3908.41	4493.92	4804.66	4948.31	3843.67	4062.78	4802.42	4490.8	4023.92	3916.91	3819.25	4423.55	4149.67	3714.75	3562.27	3090.58	3502.51	3095.76	3932.37	2884.37	3237.59	3580.65	3667.4	3120.85	3480.31	3270.93	3075.02	3085.61	3145.87	3010.55	3283.86	2847.37
pos_1788	Naphthofluorescein	7975.77	6808.57	7654.23	6097.3	6319.75	6467.03	5400.66	7768.03	5331.66	6310.36	5039.66	5745.96	9027.72	9297.62	7287	7731.04	8055.07	7763.91	6162.35	5311.6	8261.04	9347.06	5971.39	7465.21	8106.18	7870.48	8329.32	8216.73	7222.18	9188.84	8800.02	11487.2	15775.5	14903.8	13246.4	17299.4	8141.04	7642.98	7552.37	12692.5	10497.3	8605.5	8248.17	9981.46	11458.6	10011.4	13760.7	10895.1
pos_1790	dTDP-5-dimethyl-L-lyxose	1735.37	1907.14	1736.48	1909.05	1814.56	1758.17	2376.69	1857.7	1714.73	1643.3	1896.65	1690.73	1998.23	2012.88	1684.78	1947.62	1938.92	1877.97	1837.75	1868.39	1553.44	1599.71	1865.31	2008.34	1704.8	1513.85	1710.88	2144.92	1544.46	1686.42	969.537	1033.65	1543.79	1546.08	1495.11	1657.39	1279.16	1210.12	1287.06	1245.06	1714.34	1488.04	1721.12	1235.17	1563.09	1791.42	1424.01	2051.83
pos_1792	p-cresol	256.711	283.599	322.224	253.559	184.382	189.436	222.803	248.039	254.565	223.98	267.597	230.481	244.034	223.059	235.62	232.652	187.634	244.776	246.746	253.87	218.933	211.46	250.956	273.581	255.438	236.661	191.903	238.99	223.551	272.635	138.45	112.532	127.95	114.685	127.572	132.011	139.242	125.164	120.79	134.555	137.67	146.673	169.475	112.92	179.274	154.116	114.521	148.767
pos_1798	ε-Caprolactam	277.224	248.826	235.869	241.371	308.949	246.835	436.217	404.126	380.731	573.488	394.892	641.959	280.21	263.973	215.693	286.119	256.743	258.191	267.921	260.431	236.021	230.884	205.728	236.086	243.047	224.318	227.728	234.993	225.875	238.307	255.19	272.467	370.12	180.58	298.666	192.08	381.029	280.79	282.836	394.77	488.805	422.306	269.183	251.571	258.961	268.839	295.84	252.468
pos_1799	Caffeoquinone	5461.54	5379.74	10210.7	3304.23	3242.81	3881.52	2833.85	4884.55	2990.11	4863.02	4749.32	5933.96	8457.01	3952.65	4388.03	11088	4700.77	3849.77	5073.14	3955.65	4568.77	4247.6	4028.81	5981.63	6515.88	8030.57	4344.37	11909.5	7598.22	6376.38	10960.1	7966.34	16260.7	6848.4	17300.9	5283.5	7184.68	10162	11520.8	8269.67	3894.12	3945.09	6975.45	5866.99	5108.24	3975.63	6830.82	3931.88
pos_1807	N-Acetyldemethylphosphinothricin	568.258	556.63	479.262	549.106	611.87	568.7	592.431	592.289	527.403	501.893	485.82	505.311	625.808	569.906	532.664	566.353	504.958	489.956	472.5	488.56	582.85	539.106	503.427	561.328	613.451	538.132	520.352	550.469	506.198	561.116	766.436	679.051	581.844	365.636	597.902	457.111	520.485	536.697	576.728	521.965	549.006	633.969	542.214	513.536	481.222	545.216	467.594	471.984
pos_1822	Chlorogenic Acid	36307.2	35893.2	49197.2	38276.9	34041.8	34907	15468.5	40644	33059.5	34252.3	21780.9	29506.6	45416.9	44591.1	43797.6	46650.2	41686.9	45186	23874.3	19753.3	43235	45884.1	28739.6	35642.8	41041.4	44207.9	44101	45569.2	44347.3	47846.2	31706.4	41639.7	53720.4	69682.6	51457.8	64367.7	39525.6	41197.5	36331.3	48756.7	50857.9	43113.9	40693.4	54660.4	51057.4	50587.7	59597.2	58347.6
pos_1829	NADPH	3845.29	4315.43	5851.46	4708.47	4865.79	4875.4	1551.85	6060.27	4416.92	4353.61	2102.91	3318.31	6787.86	6500.86	6025.19	5943.32	5544.58	5776.27	2642.97	2180.26	5163.09	5832.48	3390.52	4427.56	5656.51	5717.01	5347.56	6148.01	5958.42	6225.67	3818.96	5398.1	7605.41	9247.37	6369.58	9770.32	5557.85	5407.49	4708.11	6290.08	7940.2	6576.94	6758.83	7691.65	6914.58	7717.81	8517.97	8297.17
pos_1836	2-Methylcyclopentane-1,3-dione	369.759	402.452	490.152	378.814	328.049	312.571	225.825	414.168	311.574	328.552	264.708	303.753	454.787	433.075	396.899	405.274	391.169	419.759	300.791	257.774	390.234	410.133	311.195	365.989	418.189	399.758	401.92	464.639	407.539	458.38	295.59	327.806	465.692	585.435	433.191	537.551	335.662	338.977	293.394	387.971	442.742	369.195	389.172	435.241	455.312	423.026	496.904	484.436
pos_1840	cis-2,3-Dimethylthiirane	4016.03	3967.72	5762.42	3891.63	3421.43	3527.97	1701.14	5037.33	3664.03	3886.87	2313.61	3167.3	5347.62	4839.81	4585.96	4797.36	4715.04	4851.77	2899.53	2463.33	4790.46	5068.91	3307.51	4030.12	4751.36	4911.76	4793.97	5441.92	5073.25	5389.13	3358.35	4104.94	5805.65	7871.62	5448.33	6708.41	4166.57	4174.84	3601.58	4722.21	5313.19	4232.09	4238.53	5616.25	5449.54	5210.48	6455.58	5941.86
pos_1842	Alfafuran	16515.5	16464.1	10308	11592.2	12987.6	13930.3	16157.5	14876.7	16852.2	13230.4	16493.4	13967.9	15140.9	14894.3	9788.86	14494.7	15462.6	14669.7	14544.7	13725.6	11664.2	11157.2	12691.9	14982.1	13533.6	11363.4	13851.8	11721.5	12268.9	13570.8	11372.4	10198.7	9378.58	5794.6	10076.8	5526.07	8792.73	10247.7	8839.46	7750.04	6824.83	7452.26	8858.25	8584.41	10271	9316.38	8419.22	8239.31
pos_1849	Phlorisobutyrophenone	6219.04	7849.04	5783.41	6450.57	5610.94	6500.53	7904.87	6669.24	6780.23	6875.38	9494.56	7737.32	5336.33	4933.36	6484.59	5548.02	5963.5	5242.92	9046.28	8273.38	5436.23	5375.8	8139.06	7728.67	6615.92	6844.76	5573.55	5504.47	5459.62	5098.85	5650.73	5186.6	4212.87	4474.33	4711.16	5171.37	6212.21	6774.95	6294.15	5944.46	6705.85	8194.26	10104.9	5748.78	8561.97	8229.53	5788.06	7461.2
pos_1854	Styrene	691.32	624.888	614.647	562.51	474.849	471.62	447.383	734.437	627.746	666.525	464.84	407.008	476.69	417.71	624.433	453.311	393.307	462.983	463.841	525.993	533.629	472.975	579.088	536.506	459.786	476.485	403.424	431.003	509.977	452.159	227.696	197.384	326.43	336.372	237.278	376.976	277.337	277.464	307.481	293.491	424.831	430.97	471	248.33	356.097	367.192	287.386	441.601
pos_1862	HAEMATOMMIC ACID, ETHYL ESTER	9552.66	6090.39	7575.24	5353.8	7084.94	8242.3	4910.41	9988.06	6471.63	9785.09	7403.7	6998.92	8106.44	6376.89	9243.7	8265.22	7276.3	7370.09	8372.51	7611.73	11210.8	8849.41	8409.24	8550.75	7630.73	8197.95	7687.6	6347.49	7080.85	6703.57	4022.62	3860.48	5332.63	5584.86	4664.24	5333.89	3550.51	4074.43	4049.56	3746.29	4871.73	4412.28	4282.9	4375.08	4413.47	4657.53	4570.71	4599.51
pos_1863	Dehydroamorphigenin	8276.88	7165.28	7941.94	7309.35	8088.48	6122.79	9884.02	7145.6	7295.44	6910.61	8695.75	7441.11	8800.75	9188.26	7439.65	8887.74	6495.14	8147.11	7946.9	7642.06	8074.69	8483.03	8672.54	10244.6	8797.11	7409.47	7988.76	8390.48	7141.22	9768.55	5513.25	5580.84	6192.29	7368.7	6635.73	7936.62	5143.96	4658.08	4487.45	5807.87	8139.02	6560.78	6547.49	5786.85	9051.23	8084.29	7424.23	8215.07
pos_1865	4-Hydroxy-L-threonine	10931.5	16826	18101.3	16883	9387.96	11729.6	5104.62	11192.6	6479.15	10490	8654.82	9027.2	11229.1	10331.9	9902.72	10008.9	11784.4	10612.3	9013.87	8628.14	11637.5	10922.9	9271.57	9052.06	11332.8	10455.9	12281	13854.1	14618.6	14184.6	3357.7	3792.5	3995.37	5156.26	3686.67	5160.9	5459.88	5653.97	3584.85	4570.74	8957.27	7473.05	5989.61	5189.19	7195.39	7659.84	5031.92	8295.17
pos_1866	3-Dehydroshikimic acid	1447.76	993.415	1851.38	989.236	1172.1	911.458	770.486	1908.72	1144.14	1198.09	1707.83	1182.98	2127.88	2530.68	1643.93	1395.95	913.983	2288.8	935.439	1482.17	2577.02	2916.08	2104.06	2300.13	2320.42	2118.03	1477.25	1787.82	1242.96	3763.23	916.474	2009.58	3462.73	2190.14	2162.8	3629.3	1113.85	568.16	525.302	2791.85	2270.27	1969.37	1794.77	1908.96	2559.9	1702.9	3341.89	2609.07
pos_1870	2-Thiopheneacetic acid, 5-(hydroxyphenylmethyl)-α-methyl-	322.368	342.813	359.832	244.748	164.308	222.443	253.728	296.063	276.723	300.956	342.062	362.62	335.636	310.705	313.611	281.999	236.632	273.107	288.465	319.441	307.829	266.682	296.707	382.101	334.409	323.566	246.793	348.385	310.888	336.844	468.915	419.4	394.08	289.417	460.515	180.304	466.211	559.487	717.229	429.337	203.863	284.212	245.758	358.299	295.749	202.394	349.401	238.191
pos_1871	AESCULIN	1271.92	3544.73	2286.02	2791.37	2275.38	2989.71	2735.84	3708.74	3286.79	3285.73	4794.3	3888	2210.29	1588.13	2429.4	2006.56	2898.39	1770.39	4242.25	3587.26	1771.31	1422.18	3432.62	3611.43	2505.65	3188.79	2209.51	1933.15	2258.69	2138.7	683.122	652.017	696.587	1079.63	686.321	798.617	1070.68	933.568	1024.09	968.65	1517.22	1992.09	2870.19	988.149	2310.56	2272.82	869.872	1302.88
pos_1873	Naringenin 7-O-beta-D-glucoside	1651.12	1036.67	933.096	1065.29	1259.74	1458.79	1333.77	901.266	1119.83	1152.61	1528	1415.35	1236.53	1237.24	1283.73	1053.56	1202.97	1308.9	1408.57	1124.39	1351.8	1353.54	1389.31	1187.92	1225.33	1287.34	1200.62	895.07	976.886	989.524	1021.85	920.388	1156.21	1359.22	1001.43	1388.53	1345.85	1176.18	1483.83	1234.43	1855.07	1807.67	1420.41	1307.2	1133.22	1300.52	1417.22	1270.65
pos_1877	4-Cresol	30610.9	38988.1	39509.1	37321.4	30926.1	35461.3	15518.8	43581.5	28527.8	39282.5	22110.3	28859.6	41013.1	36715.9	32640.4	37755.3	46251	41510.8	29203.2	23937.7	29180.2	30259.1	27184.3	25954.9	38722.3	37064.8	39137.3	37099.5	37753.8	33763.8	21948.7	23309.9	18189.6	24396.7	21439.4	32483.1	27485.7	27444.2	23818.5	21787.6	42161.2	39409.9	34396.7	23624.5	36673.4	39295.2	23310.8	37703.6
pos_1878	3E-Hepten-2,5-dione	11.9182	10.7667	4.37147	7.67782	24.427	35.3195	15.8632	18.5536	8.3352	37.0213	33.4821	10.7823	14.8906	16.7315	47.7632	25.557	26.3492	31.5914	44.0882	36.3297	33.5804	32.8125	43.3185	30.993	17.2886	45.6447	43.8221	5.72439	13.9192	0.308917	1.55761	0.0213057	8.77353e-08	8.77353e-08	3.29442	8.77353e-08	1.08979	0.2215	0.396995	8.77353e-08	0.268953	2.96889	8.77353e-08	0.058733	8.77353e-08	0.0169	0.0648605	8.77353e-08
pos_1880	3-beta-D-Galactosyl-sn-glycerol	1301.06	988.375	762.627	822.15	1303.28	907.064	1974.51	712.366	1630.51	946.81	894.246	843.251	724.498	911.625	703.434	799.119	650.546	775.463	726.577	857.69	695.374	686.693	842.643	785.393	832.292	775.101	741.66	750.373	703.929	667.716	734.645	645.796	1208.67	1006.44	861.888	1414.47	809.35	790.308	981.191	763.704	855.564	812.415	846.105	604.65	593.479	622.184	873.046	800.303
pos_1883	alpha-(1,2-Dihydroxyethyl)-1,2,3,4-tetrahydro-7-hydroxy-9-methoxy-3,4-dioxocyclopenta[c][1]benzopyran-6-acetaldehyde	1671.46	2041.19	1524.85	1834.97	1872.8	2047.44	1388.95	2600.4	1630.01	2380.23	1383.33	1422.69	2433.23	2469.94	1580.8	2218.08	2801.35	2672.45	1947.36	1628.67	1487.58	1530.18	1569.1	1580.21	2323.3	2064.06	2053.44	1571.51	1725.86	1599.03	1684.53	1418.14	1123.61	1454.23	1353.94	2414.28	1750.45	1661.29	1819.76	1299.1	2452.7	2588.46	2458.16	1287.81	2175.74	2353.39	1175.78	2131.05
pos_1885	Asp Gln Asn Asp	4501.42	6646.17	7986.74	7123.96	3610.27	4672.06	1759.59	3996.93	2457.19	4089.61	3620.47	3605.55	4182.05	3869.67	4136.32	4090.26	4791.8	4562.83	3413.29	3234.4	5302.9	4896.38	3838.13	3830.86	4407.8	4390.38	4957.82	5664.58	6004.73	6569.45	1280.19	1499.93	1757.05	2678.29	1634.02	2709.85	2099.6	2348.66	1644.52	1920.86	3836.88	3120.37	2308.97	2254.29	3198.8	3140.74	2154.72	3425.02
pos_1890	Purine	124.475	143.56	132.846	131.764	112.752	112.319	113.177	133.085	97.3445	118.709	128.196	117.728	135.69	124.066	118.35	114.711	113.747	119.04	137.588	130.28	119.841	117.712	123.014	120.574	128.974	120.661	110.78	114.394	109.578	132.159	75.0096	66.3224	70.2581	65.634	64.7079	84.1794	71.183	80.496	81.7665	72.6623	89.138	98.1327	94.3946	62.1869	85.4872	79.7112	65.4555	87.0113
pos_1891	Maltopentaose	22455.7	16187.5	14118.1	12633.2	26302.2	10655.3	36911.5	10570.2	25909.1	13171.4	9495.33	11206.1	16395.1	19712.2	14328.1	20798.3	14105.3	16022	10374.5	7783.34	11272.7	12438.9	10319.5	12231.4	12204.1	10512.6	14399.6	16966.5	14032.2	15240.6	15493.8	17421.3	18913.5	18696.4	22430.3	20348.2	11063.3	10828.6	11123.6	13633.1	21228.1	17737.8	16720	14607.7	22426.4	22090.3	19869.3	18334.7
pos_1895	Pelargonidin 3-O-(6-O-malonyl-beta-D-glucoside)	1750.8	1021.15	2279.28	905.753	1715.77	598.724	1196.67	1380.65	1897.39	1044.31	1038.65	960.713	2543.01	3068.81	1817.91	2008.21	864.755	2140.22	696.917	818.02	2119.45	2827.73	1437.3	2242.52	1889.99	1658.64	1401.82	2140.48	1107.29	3694.6	1140.04	1157.9	1311.17	850.109	1090.53	1007.56	1350.53	1461.38	1380.76	1387.93	2195.17	1755.4	1395.18	914.843	3492.93	1312.53	777.845	1975.62
pos_1899	Gentiopicrin	1427.78	653.02	868.03	583.05	672.406	800.865	541.747	1323.93	997.382	840.783	819.413	1265.48	1624.26	1247.87	1096.3	1005.11	918.112	1488.06	1287.75	1150.59	2319.43	2359.63	1191.95	1829.91	1732.75	1639.39	1751.94	1425.98	1057.83	2553.01	7570.62	8918.65	8665.47	6473.29	7387.15	9296.96	4413.4	4983.86	4647.65	6515.21	2907.53	2761.57	1631.29	4998.03	2036.01	1330.31	4754.22	1657.46
pos_1900	2-Hydroxy-cis-hex-2,4-dienoate	708.651	540.294	756.082	494.234	559.348	492.597	495.752	757.939	526.669	552.978	829.236	580.335	845.622	1022.55	649.613	629.206	461.771	969.844	524.487	744.252	989.476	1008.95	917.234	894.787	906.298	817.12	619.12	617.836	454.396	1227.51	297.395	304.91	294.059	317.556	269.919	435.073	295.448	282.205	246.384	371.539	584.446	656.329	629.096	325.99	772.984	486.174	379.933	629.449
pos_1902	3-O-Ethyl-L-ascorbic acid	6588.09	11522.6	11912.8	10428.1	6324.77	8030.15	5654.73	9142.58	7029.44	7790.14	7881.82	8895.98	9303.83	7219.43	8406.48	8862.53	8488.74	7458.93	8993.99	7924.88	8247	7682.85	7866.6	9408.26	8597.12	8344.54	8746.13	9303.75	9887.03	9565.32	8438.12	8261.78	8209.78	9382.73	9277.23	8497.38	9299.16	9868.6	9250.79	9356.83	11413.9	10675.4	10461.9	10232.3	12193.3	11437.5	10550.5	11819.4
pos_1903	Coriandrone C	1546.45	1592.63	1826.49	1310.01	1653.73	934.752	2276.13	1287.88	1675.06	1179.2	1105.27	1170.3	1863.76	1689.85	1489.48	1643.15	1211.67	1309.27	1205.81	1084.06	1370.86	1490.5	1240.06	1640.32	1446.1	1278.93	1338.19	1921.96	1654.17	1768.44	1552.95	1594.79	1894.46	1793.45	1979.86	1862.12	1366.53	1219.61	1214.98	1475.92	1982.33	1521.61	1554.68	1475.87	2193.8	2035.33	2033.13	2008.51
pos_1905	Cys Cys Ala Met	8953.52	7116.18	7235.08	6167.15	8933.38	6486.96	11459.5	7401.46	8977.64	7479.42	6166.1	5937.17	9547.87	9833.75	7534.72	9069.19	7956.12	8008.55	6772.34	5989.44	7389.65	8215.98	6577.29	7601.9	8542.62	7186.64	8426.82	8838.56	7571.69	7904.85	6896.39	7119.5	9705.53	9817.67	9374.18	10314.2	7132.49	6643.44	6378.61	7241.15	10882.2	8200	8207.06	7663.01	10802.1	10457.2	10263	10144.3
pos_1906	Procyanidin B2	100290	67227.5	69327.3	51447.7	110306	36147	160099	46200	115630	51037.2	32203.9	39123.9	76927	84755.9	68023.1	93121.6	58523.8	60343.8	42624.3	33369.6	52112	68516	44679.2	65282.3	61280.5	51412.9	66889.5	100089	74368.1	78741.1	67479.7	80610.3	111153	115601	108095	123599	66041.1	55829.1	54418.2	75103	126280	84769.9	94178.9	82285.8	139606	130685	122769	129412
pos_1908	N,N-Dihydroxy-L-valine	586.398	439.902	499.326	386.794	532.3	647.471	403.812	699.838	454.689	710.474	579.243	493.432	721.213	770.129	505.272	576.648	666.408	741.217	647.807	562.247	617.147	679.741	557.793	579.379	719.022	597.732	675.687	486.361	422.951	477.851	399.433	352.205	492.101	395.024	490.63	466.005	428.226	397.221	420.383	405.469	423.321	391.977	358.692	373.365	367.012	342.453	453.988	366.172
pos_1911	5-(2'-Formylethyl)-4,6-dihydroxypicolinate	1651.8	2326.06	1182.17	1082.45	1114.81	1216.29	478.396	1417.65	1155.61	1421.69	1353.83	1717.25	1264.29	1012.15	1215.32	1341.48	911.21	1149.32	1026.57	991.804	1728.76	1302.15	1947.3	1758.62	2241.25	1923.95	1095.84	751.999	2095.25	1261.73	3862.41	3275.74	3314.8	3605.49	3467.3	2095.99	3830.16	4718.66	4255.81	3627.53	3069.65	2626.41	2467.14	3127.35	3292.07	2646.53	3014.2	1873.62
pos_1914	Indole	2660.4	2342.25	1499.21	1947.31	1732.89	922.228	2879.5	1120.29	1546.51	1173.27	914.913	855.211	910.864	1191.55	1370.15	1012.35	731.995	1031.41	844.838	1205.27	867.201	965.082	1064.3	851.069	1045.42	1065.76	864.257	972.236	842.219	1008.19	1168.63	1155.86	863.624	1246.93	1024.9	1447.08	851.494	1240.53	1027.06	1112.86	1305.65	1557.61	1854.89	1179.98	1468.87	1590.17	1193.05	1899.35
pos_1915	2,6-Dimethoxyphenol	11044.2	6850	3410.65	5768.3	6576.92	3095.7	12320.6	2563.98	5788.18	3886.21	3235.54	2911.94	2925.4	4976.38	5297.34	3336.52	2263.4	3989.9	2825.33	4822.45	3321.78	3878.63	4120.28	3154.2	3702	3223.26	2750.68	2402.58	2175.49	3777.92	4292.11	4267.17	2574.94	4018.68	3525.13	6029.37	3234.42	4810.18	3959.38	3944.78	5229	6600.26	7945.7	3747.94	5652.15	6428.55	4038.68	8162.48
pos_1916	Nicotinurate	5501.53	4751.55	3087.49	3937.86	3771.71	2256.23	6147.96	2027.05	3409.41	2562.01	2110.07	2243.11	2134.09	2717.95	3265.39	2220.13	1876.78	2222.33	2507.39	3110.2	2070.5	2223.44	2530.49	2376.49	2476.76	2236.4	2175.63	2364.99	2226.93	2239.77	3542.62	3339.58	2563.18	2895.43	3497.65	3499.24	2854.81	3635.44	3320.73	3100.54	3082.1	3551.8	4063.65	2840.43	3133.34	3645.53	2982.51	4252.35
pos_1919	ETHYL SYRINGATE	24005.9	14558.5	6168.44	13092.6	14799.3	6569.71	28230.1	4054.62	12887	8021.02	5446.46	5701.99	4623.85	7877.14	11053.6	6436.81	4889.58	6132.3	6456.16	9517.18	4379.37	5524.2	7160.3	5132.2	6000.01	5369.09	5329.5	4828.36	4460.4	4249.04	9781.29	10328	6637.91	8979.13	9069.56	12786.8	8165.45	12003.3	9753.17	9400.19	10460.4	13087.3	15557.4	9020.88	10472.2	13654.7	9191.67	16799.7
pos_1922	Geniposide	6003.24	3716.1	2169.45	3778.76	4942.99	2351.14	10291.6	1894.61	4528.09	2452.38	1934.17	2070.36	2237.97	3271.48	4005.18	2441.31	1831.8	2359.7	2439.15	3174.6	2929.31	3534.59	3238.44	2384.84	2879.95	2327.91	3681.06	2622.36	2043.36	2340.35	3462.7	3480.61	3967.88	4206.19	3113.62	5248.45	3313.38	3550.2	3302.29	3607.25	5757.46	5745.07	5781.44	4501.41	6990.76	9830	5628.5	8499.89
pos_1924	Gentiodelphin	22076.9	16890.9	19501.9	17730.8	34442.2	13869.8	42183.3	13176.9	30884	17937.9	11173.9	12807.2	20303.3	25436.8	19748.9	25716.9	18002.8	21545.9	12795.5	9010.76	14352.8	15610.9	12499.3	14881.1	15202.7	12698.6	17963.2	20956.4	17875.2	22257.2	18456.7	20982.5	17323.3	22807.5	21167.2	23542.4	11710.3	11255.2	12119.9	16542.2	26508.2	23092.7	21054.3	17234.4	29446.7	27685.8	24574.1	20197
pos_1927	1,3-Diaminopropane	358.678	190.473	247.126	147.502	149.652	223.868	134.354	310.984	206.054	198.699	314.806	419.011	271.09	161.056	242.327	242.127	161.604	156.541	430.946	305.908	439.772	314.203	291.195	521.329	287.047	316.311	303.99	362.532	289.343	455.588	85.1276	57.4461	90.7779	43.7302	80.685	60.5298	96.197	72.9099	78.588	88.3875	78.6412	51.5303	45.0333	74.7834	79.2162	56.789	82.3295	53.8308
pos_1933	Epicatechin-(4beta->8)-epicatechin-(2beta->7,4beta->8)-catechin	8978.45	7939.62	7238.45	7235.57	9182	6397.84	11849.7	6493.81	9646.2	7170.28	5424.52	6253.93	7977.44	8169.13	7301.93	8181.42	7246.11	7522.63	6533.05	5730.22	6546.2	6680.02	6109.14	6381.71	7087.39	6335.56	7066.48	7038.41	6502.98	7562.38	7200.75	6952.4	8875.69	8409.77	9039.41	8602.85	6208.82	6357.49	6357.14	6755.7	8253.99	6995.09	7110.75	6575.39	8568.46	7704.95	7804.65	7965.12
pos_1938	trans-beta-D-Glucosyl-2-hydroxycinnamate	16911.5	13525.6	13515.7	13146.4	15303.4	18501.2	8815.8	19309.1	13717.5	18653.7	12379.7	13504	19174.7	18914.5	12649.7	18533	20263.9	19839.2	11490.6	11156.4	17461.5	18953.6	13273.7	11978.1	18925.3	17806.2	21155.9	15059.8	15124.2	14405.2	6802.89	9078.99	11719.1	9060.38	7269.38	10761.2	9296.24	8742.56	5944.04	7505.44	13856.1	11838	9599.21	9950.5	11134.3	12493.3	9831.95	13599.4
pos_1939	S-Lactoylglutathione	14491.7	28372.9	31268.8	29367.4	11231.8	12240.3	11180	20982	11469.6	15991.5	16804	16613.5	22518.9	22025.5	20324.4	19780.8	17000.9	20722.8	17391.1	15934.5	21506.3	20948.7	17478.9	18574.8	17626.8	16483.2	16230.9	18606.3	18593.4	20568.2	14731.9	14055.5	15176.6	16705.6	15425	17088.2	14103.1	13730.6	13499.6	16485.3	29973.8	22176.6	19619.8	15710.9	24824.6	22932.7	16209.8	26016.2
pos_1946	Enprofylline	3838.35	4310.14	4192.9	3964.72	2734.96	2296.16	3367.54	2496.4	3032.88	2798.68	2829.94	2964.73	2918.35	2594.92	4391.81	3204.68	2909.38	2656.61	4049.65	3850.21	3109.5	3357.34	3333.44	3778.28	3256.75	3309.44	2779.29	3810.75	3912.27	3705.46	2085.18	2097.58	2074.85	2255.14	1957.65	2400.69	2350.82	2140.59	2208.45	2246.42	2739.66	2472.28	2613.32	2127.42	2502.35	2666.37	2241.43	3068.13
pos_1949	Linamarin	267.344	249.405	323.262	264.497	162.823	195.501	210.425	206.905	275.607	224.162	342.751	325.682	250.553	231.684	321.903	251.257	185.156	247.653	272.261	278.43	257.231	185.832	257.478	257.173	213.494	185.558	207.628	192.265	246.483	227.148	125.82	88.5124	124.533	120.252	133.006	139.526	119.49	117.032	96.9439	109.379	129.736	150.612	126.375	112.561	129.732	126.672	110.282	128.302
pos_1951	Rhizocticin A	1712.26	1558.5	1071.52	1048.63	2137.31	2154	1311.53	2000.99	1666.1	2713.73	1370.59	1897.74	1955.08	1517.28	2378.23	1674.41	1622.61	1978.97	1481.58	986.708	2307.84	1881.55	1377.61	1417.88	2469.64	2504.31	2022.43	1342.51	1741.26	1586.52	5423.54	8512.59	10039.6	8025.25	6435.17	12222.2	8324.56	6948.2	8155.32	6971.12	6817.01	4538.48	8569.09	9761.85	6038.07	7577.06	9463.14	6868.5
pos_1954	Isradipine Metabolite (3,5-Pyridinedicarboxylic acid, 4-(2,1,3-benzoxadiazol-4-yl)-2,6-dimethyl-, mo	18610.1	32817.8	18891.7	16397.7	24421.7	26910.4	4734.83	38756.6	11724.9	37211.7	16039.2	26362.7	34561.3	23600.4	26531.6	37049.9	19454.5	25658.7	17063	7245.88	40193.4	31862.8	24309.1	24091.2	48810.5	47573.1	32859.5	17569.6	34241.3	32787.6	7411.61	13684.9	17582.4	14257.6	10967.4	21793.2	14678.8	9424.31	12799.8	12835.4	17579.9	8461.49	23085.1	18136.8	19500.8	19343	19343	14582.6
pos_1955	Aflatoxin B1	12650.1	18804.9	12736.9	12026.9	12713.7	13833.3	6186.35	17748.4	7726.27	17346.4	10425.5	13733.6	16590.6	12598.4	14905.7	17064	10702.5	13239.3	11064.5	7471.88	18402.4	15494.5	13474.2	13359.9	21547.9	21148.6	15554	10578.9	16579	16064.5	6552.97	8096.55	9539.84	8857.52	7556.27	10787.1	9070.7	7522.45	8681.86	8469.95	9813.25	7554.28	12024.7	9922.88	10664.4	10621.4	10209.9	9497.25
pos_1956	Kaempferol 3-alpha-L-arabinofuranoside	4474.85	3510.16	4652.93	3238.5	2784.66	2787.76	2593.66	4651.14	2710.17	3144.83	2592.6	2900.4	5431.7	4652.93	4040.57	3812.68	3699.56	4172.52	3971.7	3274.71	5707.54	7796.8	3821.37	5849.78	5136.03	4846.19	5294.24	6408.57	4707.06	7166.63	11903.1	26625	66331.3	47895.2	39839.1	52212.8	17841.1	9964.56	9531.6	42092.2	27467.1	20031.4	15813.6	30804.4	22429.7	22771.9	52831.8	24361.3
pos_1957	Enkephalin L	3988.52	4552.56	1638.75	2675.53	1891.82	1631.74	1499.81	1151.65	910.216	1035.02	2248.53	3245.07	1453.14	1537.5	8279.54	1260.35	1147.48	1291.59	1467.69	1553.42	7589.14	5053.68	2078.97	1254.63	1759.78	2000.2	1508.75	1444.17	1815.39	1660.3	19416.7	13645.6	15289.5	95388.1	15861.5	28559.2	42833.8	51387.8	92612.9	41716.7	9694.03	10987.3	7339.12	23351.6	11743.1	8265.5	17132.6	3285.93
pos_1965	Leukotriene E4	842.519	1270.97	1958.51	1308.4	647.559	660.219	1021.02	1386.96	867.956	849.298	809.37	1258.77	1637.51	1005.21	2304.39	1336.76	1047.94	1091.85	1109.94	901.513	892.608	1012.25	1013.02	1128.15	857.846	1160.38	839.04	1092.53	1142.53	905.039	756.884	799.55	1193.46	2271.51	1652.44	1824.36	733.579	779.352	715.466	968.382	1672.99	1191.01	1139.21	1112.34	1340.11	1313.29	1269.39	1594.61
pos_1970	8-Epideoxyloganic acid	3050.88	4449.93	5930.52	4512.62	2617.01	3044.15	2174.89	4913.08	2970.55	3902.7	2844.5	3668.57	4438.37	3067.11	4835.64	3917.05	3325.14	3468.19	3795.59	2931.43	4076.05	3702.57	3134.92	4366.49	3982.5	4158.21	3782.7	5629.56	5161.58	6057.27	2032.46	2152.39	2581.9	2864.46	2723.53	3102.57	2589.9	2964.19	2634.57	2723.03	2646.34	2132.34	2674.16	2921.85	2819.43	2704.82	3201.17	2448.84
pos_1974	5-O-Feruloylquinic acid	2012.29	2784.26	2635.08	2309.67	1476.24	1716.01	1327.88	1911.57	1433.69	1825.48	1871.11	1954.68	2044.74	1620.06	2290.29	1948.6	1701.08	1795.36	2063.48	1923.94	2114.03	1916.56	2098.09	2098.81	2033.54	1948.91	1794.99	2038.9	2018.83	2178.81	1110.67	966.311	1171.84	1079.71	1138.97	1138.82	1165.08	1202.03	1231.63	1135.24	1122.47	1085.89	1146.44	1032.28	1179.51	1167.12	1075.83	1236.52
pos_1976	Jadomycin B	1305.36	1445.37	1492.21	1309.79	988.643	1264.96	1599.4	1092.73	1543.96	864.739	1387.86	1489.05	1088.97	859.525	1206.37	771.345	727.536	680.529	1103.82	1163.82	1070.52	874.732	849.495	1130.63	943.805	895.254	971.029	1178.12	862.36	921.768	16033.8	13193.2	7248.56	5118.23	10834.6	4609.72	14165.2	18232	17733.9	10552.6	3803.01	8307.99	3130.94	9444.41	3937.63	2813.69	8735.66	3925.01
pos_1978	Cyanidin-3-O-(6''-O-malonyl-2''-O-glucuronyl)glucoside	10818.9	9857.14	12743.3	8264.48	7396.97	7293.97	6751.87	10922.5	7697.44	8077.49	8395.45	10382.4	13683	11966.2	10007.2	10955.8	9187.18	10286.6	9666.43	7927.7	13893.8	12734.9	8606.56	12264.4	12729.7	12401.7	11125	12331.8	10531.5	15803.5	41464.7	35200.4	28869.7	20310.5	42035	18330.4	25590.3	29123.5	31711.8	28828.2	14438.3	16184.9	13279.9	21017	17398.5	12373.6	21467.8	13369
pos_1979	Caffeic acid	5727.78	5986.54	8676.43	5551.14	3297.66	3856.13	1514.63	5880.77	3492.51	4903.62	2586.06	3123.21	5885.23	4967.9	5097.46	5264.8	6177.78	5480.46	4387.62	3352	4490.21	4453.57	4104.92	4189.48	5214.76	5161.03	4224.22	5929.08	6031.07	5595.19	2146.45	2375.7	3771.33	8314.65	3238.21	6553.43	3995.16	3192.82	3370.54	3025.79	6009.34	4957.75	5697.57	4906.9	7070.56	6225.57	5533.11	4897.45
pos_1980	Ferulate	14496.8	14393.6	21167.7	13742.8	7926.97	9652.06	3587.94	13326	8376.17	12138.3	5730.01	7339.78	12955.6	10841.8	12498.3	12625.2	14459.5	12705.9	10173.2	7905.33	10157.8	10021.7	9668.53	9663.81	11248.6	12066.5	9576.71	13491.5	14097.3	12204.4	4137.29	4557.78	8206.29	18913.9	6685.65	14632.2	8482.26	6656.74	7500.6	6442.8	14174.9	11869.3	12727.4	10772.8	16088.7	14498.7	12263.9	11210
pos_1988	Tetracenomycin C	1884.46	2041.18	1871.86	1775.15	1203.62	1443.71	970.461	2593.3	2000.32	1795.58	3124.29	2143.38	2588.92	1824.01	1768.02	1691.09	1628.28	2201.08	2201.13	1891.84	2883.43	2863.86	2182.1	2956.18	3231.86	3148.01	2302.25	2222.21	1832.05	3953.2	5010.04	4725.2	5897.43	7368.43	5062.77	12497.5	3182.15	2382.4	2919.49	8564.72	7721.48	6986.2	6707.01	5508.47	8006.04	6288.15	10018.3	11352.8
pos_1992	7,7'-Dihydroxy-6,8'-bicoumarin	1407.14	1410.73	1806.58	1415.73	1027.81	1232.66	376.626	1580.53	1227.73	1288.4	608.257	716.423	1183.97	1156.97	1015.68	1244.93	1057.74	1486.53	548.46	490.805	1138.55	1050.66	637.716	627.282	995.992	1090.87	929.851	920.054	1080.09	1095.12	751.813	822.164	1207.6	4149.64	882.44	1435.79	1166.53	1142.99	929.097	1303.93	1498.95	1176.9	988.059	1873.32	1351.07	1061.47	1771.89	848.499
pos_1994	Patuletin-3-robinobioside	1047.92	2428.92	2740.59	2522.75	1615.13	2001.21	1032.14	2704.5	1549.2	2357.33	2079.42	1712.78	2767.58	3022.39	1697.88	2573.72	3284.91	3012.96	1759.81	1545.73	1688.8	1646.35	1662.76	1969.52	2003.64	1858.17	1860.15	1795.25	1848.94	2150.19	947.694	853.727	931.485	1253.48	1011.23	1211.75	1150.18	1102.11	1151.92	1110.19	1385.05	1269.75	1614.79	1293.98	1969.05	1749.36	1378	1718.21
pos_1995	Tenuifoliside B	3432.4	3265.88	3638.69	3037.81	2543.99	3077.02	1375.04	3679.69	2851.67	3033.02	2137.25	2317.38	3194.75	3035.82	2622.41	3179.18	3110.51	3578.8	2186.38	1969.08	3082.56	3055.55	2149.04	2447.36	2867.12	2982.79	2980.17	2778.02	2753.2	3056.87	2118.49	2408.48	3816.72	8092.43	2470.49	4023.02	3463.58	3370.97	3069.2	3840.88	3994.54	3273.22	2833.24	4715.67	3962.14	3473.12	4749.3	3017.64
pos_1999	cis-3-(3-Carboxyethenyl)-3,5-cyclohexadiene-1,2-diol	20753.1	12956.8	13284.8	13552.2	19681.8	25799.6	12327	26984.7	18546.2	24255.7	15484.3	17558.4	25473.3	25209.5	14212.3	22862.6	29144.4	26163.2	15319.3	15548.6	19699.1	23079.2	16484.5	14382.5	23693.6	22316.2	28824.9	19209.6	17962.4	16081	15542.9	18396.7	19342.3	14378.2	15446.8	15102.2	18188.6	17549.3	11685.4	14080.8	20571.5	19815.1	12989.8	17492	15427.1	17900.6	16515.7	19805
pos_2004	S-Adenosyl-L-homocysteine	3162.86	3260.87	3204.56	3053.91	2715.17	3035.47	3382.11	4506.52	7142.71	4295.29	2870.21	2953.85	3419.37	3368.91	2686.22	2975.75	2920.35	3078.19	2895.79	3257.6	3014.75	3226.16	3327.16	3286.05	3236.09	2875.08	3174.18	2871.66	2791.69	3006.56	4000.22	3684.21	3144.47	2362.3	3314.93	2281.75	3549.47	3557.89	3150.64	3119.27	2690.35	2864.03	2312.48	2835.34	2432.25	2474.02	2615.33	2554.12
pos_2005	2-Oxo-8-methylthiooctanoic acid	1181.29	998.287	1027.9	952.558	925.106	943.458	705.24	1040.29	732.719	1016.28	963.897	1007.19	1261.18	1166.67	931.436	1097.02	1036.87	997.184	940.494	916.079	1148.53	1132.76	1007.37	1064.38	1090.56	1030.46	1053.86	1008.94	986.599	1058.55	946.005	857.935	982.853	1834.32	931.568	1035.62	1161.22	1359.56	1967.31	1275.25	738.019	705.894	700.864	896.868	751.151	718.334	828.336	660.517
pos_2012	2-Hydroxycinnamic acid	12066.4	8357.95	7562.4	6701.43	11830.8	7698.11	14716	8682.77	12968.3	8134.69	7709.94	7184.74	9873.83	11569.5	7485.48	10390.4	8758.67	9428	7135.4	7431.72	9810.3	10605.2	8004.39	9427.56	10173.6	9024.6	9682.53	9867.41	8917.7	10719.8	11066.3	11680.8	14124	12119.3	14148.8	13548.6	10152.4	9354.18	7962.14	11703.9	13188.9	10282.6	10536.7	11056.8	13790.3	12962.7	13743.1	14065.6
pos_2013	D-Glucarate	1095.39	1027.86	891.28	802.283	914.727	718.511	1124.88	788.041	1044.79	755.663	664.164	656.931	853.963	895.872	736.436	870.844	727.922	792.899	704.294	678.565	762.431	832.72	668.096	778.037	856.6	772.951	771.811	870.404	839.605	871.44	696.856	735.405	1073.01	1112.23	995.197	966.509	677.284	657.825	582.354	756.484	991.105	757.172	880.701	839.738	1084.69	1035.71	1058.36	1009.08
pos_2014	Epicatechin	85122.7	62017.8	54611.2	51152.4	87189.7	50008.9	118137	55376.3	98657.3	55945.3	41888.5	43565.4	66890.5	77782.2	55367.5	76020.9	60609.4	62532.2	42063.1	41168.9	62021.3	72384.7	46217	55874.1	63349.8	55535.8	64446.8	72654.8	63563.7	67066.6	66625.6	74787.9	110950	117026	98727.4	154144	72818.4	66235.1	61831.2	79228	103032	74212.7	78518	82157.7	105792	104589	105864	111898
pos_2021	Shanzhiside	9067.13	12355.2	14209.7	11979.6	8481.32	8864.48	7723.44	10296.3	7940.68	10136.2	9435.48	10698.2	12115.5	10390.3	13348.4	10355.1	8435.16	9968.97	9121.97	8809.48	9973.49	9788.02	10115.3	9760.75	10941.7	10310.5	9978.65	10249.6	9743.08	10451.9	7316.52	7185.47	8527.33	9191.68	8541.5	8588.27	7398.63	7740.72	7695.54	7938.57	8466.34	8557.71	8040.77	7895.62	8333.81	8269.77	8150.82	8465.17
pos_2024	5-Methylfurfural	173.292	140.996	122.136	116.68	165.753	97.5126	201.054	138.227	138.293	112.912	135.532	97.2574	144.193	174.645	104.156	139.826	119.928	131.972	135.122	120.663	126.823	134.323	130.494	147.721	147.192	124.958	125.193	127.812	114.992	150.92	116.928	123.678	169.96	137.668	166.538	164.668	119.593	93.8605	78.9687	145.684	153.163	113.917	146.785	120.713	173.772	150.052	157.028	160.913
pos_2027	Raffinose	4116.49	4140.59	3321.27	4207.73	4130.02	4730.52	4541.25	4762.15	2929.47	4334.5	4586.66	4253.02	4539.9	4851.61	3965.23	3783.82	4267.9	4020.06	5637.48	5341.26	4335.84	4016.39	4831.07	4469.34	4819.46	3714.67	4807.5	3725.61	3397.09	3969.54	2025.34	1741.39	1877	1955.92	1435.63	3392.57	1911.21	2087.58	2121.58	1676.58	2669.23	3433.3	3199.69	1544.47	2610.68	2774.49	1605.09	3055.5
pos_2031	2-Octenoic acid	461.499	831.451	824.224	767.711	368.272	461.321	280.974	629.896	284.908	508.431	593.162	630.971	656.829	468.927	647.914	545.631	505.753	533.022	688.558	581.479	548.177	515.031	611.124	713.909	619.935	622.997	548.346	580.864	576.715	684.473	133.063	120.439	114.299	161.643	120.981	191.536	158.928	162.476	133.848	155.481	251.47	238.116	300.67	153.142	265.312	240.417	131.206	256.069
pos_2033	(S)-1-Phenylethanol	2077.73	3522	3583.97	3412.17	1681.31	2233.01	1343.48	2753.21	1348.89	2326.18	2664.96	2644.56	2831.31	2101.08	2870.47	2373.05	2323.95	2429.86	3022.04	2631.43	2471.27	2349.58	2746.37	3010.51	2742.52	2763.18	2462.74	2581.56	2531.16	2917.64	688.326	637.695	666.77	850.693	678.393	1020.27	802.452	809.116	728.937	827.238	1195.14	1187.9	1391.94	760.379	1256.53	1181.99	693.906	1242.7
pos_2034	1,4-Diethylbenzene	884.214	1508.91	1510.88	1468.57	707.336	944.577	600.684	1170.81	533.056	989.504	1083.74	1191.19	1185.09	855.372	1293.36	1051	944.194	1026.74	1218.64	1048.96	1033.45	1031.48	1112.67	1265.87	1143.59	1143.33	1029.87	1086.6	1112.37	1225.61	262.916	246.32	215.904	320.939	232.942	354.007	307.704	303.342	273.84	309.366	476.574	476.185	558.482	288.829	508.564	505.505	259.487	487.823
pos_2035	3-Phenyl-1-propanol	669.922	1172.45	1184.89	1087.09	547.601	680.917	429.213	900.513	493.88	747.461	890.361	858.836	889.448	681.065	910.022	789.536	697.08	768.442	975.998	836.424	810.272	767.482	944.314	1041.99	907.059	890.108	765.832	798.681	830.587	966.486	189.457	173.546	165.368	242.553	186.969	270.329	232.334	220.756	215.466	219.448	364.268	361.924	479.607	221.154	456.024	426.138	182.029	412.315
pos_2036	5,6,7,8-tetrahydro-2-Quinolone	4808.76	8059.62	9090.75	7722.08	3845.33	4850.42	3171.13	6292.93	2927.44	5090.31	5834.46	6401.99	6915.16	4687.72	6818.61	5936.62	5173.02	5423.44	6731.74	5698.07	5764.35	5544.22	5964.33	6843.31	6277.11	6403.16	5728.18	6493.47	6104.17	6800.17	1905.08	1755.04	1907.48	2380.7	2121.31	2504.45	2269.81	2283.48	2082.85	2236.25	3078.87	2925.24	3261.1	2118.58	3147.01	2922.08	2050.08	3012.11
pos_2037	(E)-4,8-Dimethyl-1,3,7-nonatriene	510.439	939.413	907.851	867.881	389.7	530.355	327.412	723.212	285.549	580.45	623.408	684.889	722.254	517.54	751.746	596.261	566.912	591.388	772.116	616.619	596.192	583.573	623.961	732.866	673.649	706.613	616.512	637.835	635.857	699.39	129.188	109.658	96.2429	156.432	112.716	179.313	164.604	144.029	141.669	155.289	258.81	242.492	311.208	139.718	264.581	262.276	127.179	266.743
pos_2040	Pterin	3201.56	3166.53	3159.85	3543.48	1656.97	1817.48	1968.96	1583.36	2406.85	1673.37	2430.42	2311.93	1456.07	1482.67	3240.35	1432.98	1467.43	1431.35	4409.42	4022.55	1897.97	1847.38	3903.13	3899.59	2059.7	1871.62	1841.08	2732.9	2588.53	2801.34	983.51	968.023	797.898	1043	980.946	1365	1037.53	1007.87	1031.2	1057.33	1506.11	1470.95	1408.6	922.346	1406.46	1491.62	1044.82	1475.65
pos_2043	13-Oxo-9,11-tridecadienoic acid	24847.9	40184.8	44074.9	37957.5	19490.4	25085.9	16000.2	31320.2	15328.2	25555.5	29750	32583.7	33647.4	22968.8	34014.6	29021.5	25788.4	27823.6	33194	27928.7	29665.8	28145.5	29996.3	34559.9	30448.7	32136.8	28878	31920	30570.8	34705.4	9834.56	9288.66	9811.65	11958.6	11388.6	12890.5	11530.7	11754.3	10877.1	11993.6	15636.7	14865.6	16303.8	11150	16552.7	15121.3	11068.8	15904.8
pos_2051	Thiocolchicoside	3233.47	4325.98	4945.49	4726.45	2647.25	3350.91	2216.54	3661.73	2544.23	3512.42	3623.9	4039.57	3798.13	2842.44	4703.07	3795.81	3349.46	3415.67	3985	3471.63	3729.29	3496.12	3767.82	4334.8	3692.23	4004.63	3485.93	3830.62	3878.82	4390.04	4801.21	3162.71	3210.61	3329.51	4684.75	1957.89	4413.34	5261.86	5347.59	3519.6	3199.95	3369.87	2769.97	2981.21	2921.67	2682	2847.22	2672.16
pos_2053	Rifamycin Z	245.135	333.91	490.435	471.243	118.549	266.947	94.0979	296.136	117.364	227.424	357.161	397.006	314.828	215.577	373.474	220.558	217.08	291.165	387.003	291.579	296.127	274.502	332.444	444.459	310.354	298.581	269.595	267.732	282.926	395.352	47.7499	38.6102	73.802	88.6337	38.2992	78.0827	88.006	81.7298	92.1789	81.6586	68.8503	63.199	71.1641	57.0406	90.5131	70.3234	35.7351	86.307
pos_2056	p-Coumaroyl-CoA	860.779	659.401	740.477	639.969	1107.93	586.033	1338.53	690.34	1060.46	727.478	514.728	585.381	899.649	955.538	739.453	985.766	743.818	813.001	640.424	536.009	739.172	798.319	644.923	743.832	739.931	675.322	785.829	949.026	828.707	982.874	920.756	961.997	1108.09	1135.76	1130.27	1143.16	743.787	714.043	782.659	913.453	1231.6	1056.86	1019.01	933.631	1335.37	1307.55	1215.76	1171.2
pos_2059	Crocin II	97.7064	83.7007	243.204	230.165	36.0635	170.888	10.5534	171.291	14.2145	102.8	182.702	252.123	160.28	87.0347	193.701	107.923	136.069	186.412	190.479	155.797	188.11	183.378	172.334	252.557	169.34	172.338	168.539	148.427	139.862	197.996	19.9167	11.6515	30.2809	13.315	23.1198	23.818	29.5606	30.8318	31.1707	40.4175	8.59938	24.3768	18.3071	12.6453	14.4918	10.5309	8.0091	0.339216
pos_2063	Robinetinidol-(4alpha->8)-catechin-(6->4alpha)-robinetinidol	58833.7	40007.5	48032.1	41815.9	87336.6	35056.2	111979	40711.3	83095.8	48707.7	28814.1	32082.9	57113.3	67966.9	49370.9	68582.2	51372.2	55686.5	37166	28413.5	45965	52592.8	37494.8	45917.6	47247.5	40468	53387.2	63263.5	54708.1	68591.1	56921.1	68749.9	70885.8	79646.4	76353.8	81964.4	44980.6	39479.4	38338.4	56265.5	94512.9	75602.8	75073.1	61492.6	107299	100398	86439.1	88138.4
pos_2066	1-Methyl-1,3-cyclohexadiene	686.47	1210.83	1156.12	1124.67	574.54	723.542	472.821	933.908	429.356	742.024	879.558	897.259	942.816	691.803	980.348	807.21	777.438	805.2	964.068	836.162	806.036	785.281	888.55	987.024	907.559	897.265	821.794	867.341	862.821	963.196	200.33	181.421	172.981	250.535	200.881	297.037	234.79	232.451	232.347	234.718	371.764	377.685	424.543	220.385	390.351	366.908	203.771	375.677
pos_2070	CB3717	59146.9	73318.7	85028.2	84748.3	65589.4	74723.3	44792.1	90753.2	41240.7	73977.6	84507.8	73827.1	88209.9	104333	53941.2	76036.4	90281.4	93368.4	67959.9	67228.9	90211.2	82929.2	73716.1	64243.8	91538.8	79093.7	87855.3	61209.4	68450.8	78747.4	37983.7	46202	31726.3	67441.8	32152.4	74921.5	78810.1	66125.6	57234.2	64023.1	90754.3	92844	84111.1	66053.8	102699	107265	67911.1	118941
pos_2074	Pavetannin B6	8347.45	6488.19	6116.4	6395.31	11849.5	7758.14	15503.1	6921.79	12518	8109.8	5280.54	7363.34	8714.22	8250.62	7869.94	9201.39	8916.91	7363.07	7984.85	6213.35	6861.81	6755.21	6310.05	7613.54	7537.82	6776.01	8233.22	8733.02	8115.6	7781.26	10938.2	11824.6	20912.7	14938.9	18461.5	15388.9	12233.7	11652.8	9733.99	11784.1	13016.8	9082.37	11534.2	13211.5	15693.9	15163.4	16035.1	15790.8
pos_2079	(S)-Chiral alcohol	1022.49	1272.02	993.208	923.619	770.47	841.924	685.615	954.986	927.43	1285	956.27	942.288	881.951	872.632	1058.88	945.984	1266.89	813.479	837.434	789.394	938.749	835.354	950.824	934.736	1206.17	1103.27	875.559	918.676	1041.48	881.528	1349.94	1236.26	1725.7	2335.95	1237	3465.69	2456.45	2989.57	3408.92	2082.26	1216.35	1353.31	2456.03	1798	1275.99	1284.48	1730.15	1299.72
pos_2081	20-Hydroxyleukotriene E4	1108.12	1303.29	1248.19	1557.39	1240.12	1219.22	1219.79	1188.72	1692.19	1628.14	1038.85	972.519	959.056	938.531	1414.18	1216.33	1034.15	1094.23	1179.6	1428.86	961.981	1073.86	1378.82	1167.46	1229.84	1069.93	1094.28	978.933	1039.27	1015.8	246.399	300.554	284.939	272.218	272.595	478.618	309.599	378.637	307.654	330.044	601.495	619.178	629.796	296.108	484.897	546.046	308.477	658.354
pos_2082	Ternatin C5	2782.36	2328.18	3989.13	1436.26	1093.79	1820.03	1365.49	2229.12	3006.42	1765.99	2229.18	5843.81	2716.32	1211.98	2758.53	1348.63	1260.27	1020.88	2063.33	2007.14	1800.87	1472.56	1340.05	2640.51	1666.54	2059.29	1509.44	2778.79	2602.93	1847.37	18052.4	13445.5	6964.02	5451.76	15186.1	2793.33	9647.67	10360	14965.3	8408.35	2754.49	5352.61	2010.03	5617.82	2237.27	1716.85	4841.09	2184.84
pos_2083	Riboflavin (Vitamin B2)	10477.2	8002.85	7934.19	7854.42	7290.19	9153.73	8506.64	8137.44	9206.05	8246.06	11592.5	12593.3	10463.9	10179.4	9003.7	8535.05	8767.65	8012.08	9912.79	11802.6	8496.18	7893.93	9536.07	9814.14	8179.09	7054.78	7602.86	9620.22	8041.88	9250.43	9965.25	9426.18	10788.4	9836.54	12359.9	9805.22	10565	10996.8	10330.6	11838.6	8643.41	7514.73	6852.86	9393.62	5121.81	5588.21	8895.44	8396.46
pos_2086	(R)-(-)-Mandelic acid	648.148	514.072	746.11	451.915	435.066	543.208	252.843	713.927	413.233	564.026	391.238	535.741	790.219	559	652.734	675.825	633.734	546.717	527.474	422.101	698.212	705.019	481.658	542.678	648.846	751.186	640.698	856.177	793.354	693.552	415.48	402.856	664.417	691.17	548.095	555.048	509.628	502.305	455.885	470.935	644.447	558.013	481.189	588.499	567.792	540.751	663.18	579.034
pos_2087	Benzofuran	26607.2	21162.4	21805.9	21674.9	28025.1	32200.1	17325.1	35613.5	33692.5	32288.4	21925.4	25961.2	35537.7	33878.4	22962.5	33010.8	38187.4	35852.2	21558.8	20197.9	26880.2	30129.4	22632.3	20735.7	31596.5	30764.2	35620.5	27831.5	25656.9	24499.5	24795.9	29684.8	37258.3	34855.3	30066.3	36552.2	32824.8	31426.5	25321.6	29398.5	38252.1	35657	30481.4	33317.8	32442	34995.8	33093.7	37290.3
pos_2091	2,4',5,7-Tetrahydroxyflavanone	9920.32	10248.1	16936.7	8320.27	5721.22	7544.52	7209.6	8729.01	8822.74	6804.02	10526.2	18085.3	11426.6	5869.06	10385.1	7919.86	6275	5695.39	9936.02	7878.56	7544.85	5940.6	6169.29	11001.7	7343.39	7679.58	6689.12	12264.8	9576.53	8982.58	73112.7	55266.8	37954.5	30564.9	59471.9	12206.8	47503.6	59020.8	63774.8	47124.1	13758.9	19558.2	10812.9	28447.5	13681.3	9230.14	25338.9	9002.71
pos_2098	8-D-Olivosyl-landomycin	1136.02	1115.03	1142.49	999.762	739.633	918.711	763.702	983.678	936.293	966.651	879.954	1022.7	917.679	799.865	890.398	831.516	904.607	753.361	947.558	833.684	875.407	831.549	828.131	877.187	881.175	773.711	767.677	984.391	874.418	923.79	2536.92	2333.28	1922.05	1654.14	2326.02	1495.28	1817.36	2289.46	2212	2089.9	1159.05	1292.89	1109.7	1522.51	1203.74	1051.36	1535.15	1071.78
pos_2103	4-Deoxy-4-thio-alpha-D-digitoxosyl-calicheamicin T0	1498.49	985.03	803.908	836.828	1972.49	2633.45	1456.41	2131.35	3534.59	2037.06	1952.85	2979.96	2022.21	1857.89	1756.42	1778.34	2077.19	1869.67	1630.16	1209.25	1385.83	1590.85	1488.45	1425.75	1612.65	1858.52	1785.76	1459.74	1573.26	1142.18	3319.9	3797.33	4242.26	3951.07	3264.54	4149.51	4408.47	4276.66	3835.23	3807.97	3853.77	3945.4	3587.17	4500.78	2968.35	3568.18	4109.57	3656.59
pos_2105	Cinnamtannin A2	25302	19201.7	23327.9	22714.7	46407.4	18842.3	53102.4	20671.8	36670.4	26244	15994.9	15946.2	28318.6	35219.9	24765.7	35182.3	27249.3	31523	19416.4	13917.9	24050.2	26366.5	19442.5	22115.8	23710.5	19615	26428.5	27350.7	26155	35401.9	25783.4	30949.3	27607.2	34012.2	31567.7	34133.8	17864.2	15756.8	15577.4	23251	42513.5	36341.9	35502.3	26087.5	50679.9	46845	37181	37108.2
pos_2109	4-(2,6,6-Trimethylcyclohexa-1,3-dienyl)but-3-en-2-one	637.604	1098.81	1105.11	1062.09	390.133	478.427	358.902	756.802	526.23	550.425	796.239	645.185	881.999	628.047	801.694	1017.47	545.635	657.614	896.333	801.854	898.559	719.149	780.128	1044.68	836.413	793.419	674.306	746.565	773.382	1023	204.228	182.752	167.65	186.537	217.23	235.976	257.697	252.647	206.362	258.97	257.128	232.549	395.906	289.64	385.472	325.066	278.184	326.538
pos_2124	5-methoxyuridine	2472.44	2766.7	2484.12	2284.65	1466.47	1802.43	1611.41	2309.05	1672.67	2092.08	2594.87	2407.28	2136.01	1754.31	1934.06	1837.48	1639.99	1652.72	2224.05	2128.2	2299.75	1909.46	2118.7	2268.95	2133.53	1965.85	1712.13	1878.44	1912.42	2097.08	2276.32	1946.49	2714.46	2646.72	2089.69	1491.77	4363.42	4011.03	4511.94	3658.4	1729.77	1753.74	1901.51	2426.8	1996.98	1645.69	2244.01	1433.51
pos_2125	5-Hydroxypseudobaptigenin	2364.68	7217.84	4618.39	5793.09	5100.89	5730.16	3626.04	6277.82	4652.67	5936.92	7418.81	4847.29	5607.71	4589.36	3268.79	5216.31	4582.7	7085.35	4101.83	3367.79	4483.16	3754.8	4655.18	4984.99	5346.45	4921.26	4364.22	3309.94	3663.05	5602.92	2641.19	2575.97	2192.81	2525.3	2330.19	1914	2607.99	2260.88	2337.33	2822.22	4251.51	4969.15	6332.55	2930.26	7526.62	4393.17	2412.98	3347.38
pos_2126	(S)-10-Hydroxycamptothecin	605.328	776.644	749.959	689.174	586.535	665.803	639.307	853.01	921.835	722.918	941.287	940.582	768.717	623.076	637.789	640.862	668.546	619.863	846.671	819.091	639.221	600.53	678.556	809.65	794.507	753.297	624.76	689.254	658.272	737.519	9368.09	6205.47	3891.53	1324.33	9631.89	705.443	5470.79	7359.71	8434.67	4407.74	974.869	1110.64	1160.78	2361.62	1118.25	982.334	1904.61	916.294
pos_2131	5,7-DIHYDROXY-4-METHYLCOUMARIN	8167.41	12830.2	11803.1	10654.7	7836.11	8933.31	6739.01	10678.1	8046.59	8452.79	8759.47	9225.91	12371.4	10393	8621.27	11027	10834.6	9742.37	10413.3	9149.22	9759.43	8728.1	8842.07	11452	11271.1	9838.24	10322.2	11837	12456.5	12147.1	11007	11688.3	7732.39	9799.2	12540.4	9784.62	12397.3	12612.7	10928.5	12161.4	13854	13540.3	16626.5	12886.1	19801.9	17340.2	13451.4	17691.2
pos_2135	3-O-Feruloylquinic acid	1388.4	1371.55	1695.73	1289.08	1022.6	1093.66	879.647	1226.11	981.799	1208.44	1124.65	1220.86	1409.95	1133.67	1440.5	1356.34	1074.98	1179.62	1262.39	1181.7	1604.29	1475.19	1284.49	1387.56	1460.48	1401.34	1350.71	1442.31	1323.96	1445.45	723.946	763.07	1115.07	851.76	1069.18	992.559	828.942	830.185	779.081	858.029	933.542	769.548	807.341	833.7	897.448	858.983	969.249	1030.48
pos_2138	Formyl-5-hydroxykynurenamine	429.247	295.182	374.674	488.274	337.848	420.689	286.498	328.957	424.158	546.282	480.911	391.051	226.286	290.877	364.688	348.66	398.361	413.369	294.316	336.068	357.723	326.546	401.798	345.928	420.624	332.976	380.578	396.779	456.77	382.4	601.597	565.765	518.917	869.123	655.16	1022.71	901.408	1210.11	1092.97	990.257	441.852	310.278	350.81	925.391	465.205	464.165	852.236	426.396
pos_2139	Vitexin 2''-O-(E)-ferulate	1235.83	1234.08	2450.02	843.144	446.498	634.363	517.095	867.458	785.17	644.825	1006.85	2939.7	1691.05	635.132	1454.8	728.157	580.444	596.289	1130.45	779.916	960.698	726.9	746.045	1722.93	899.556	961.088	716.847	1597.44	1308.68	1117.67	15512.8	12766	6578.23	4508.13	10398.4	1426.39	9584.12	11809	11519.6	8952.53	1727.6	2343.29	1241.82	5692.18	1785.75	956.857	4428.19	926.799
pos_2141	Peonidin 3-(6''-p-coumarylglucoside)-5-glucoside	723.529	754.698	1365.62	551.803	288.635	393.134	347.541	540.69	479.033	440.286	617.84	1565.44	912.428	370.42	786.433	424.495	330.848	339.655	645.091	457.698	523.767	435.713	440.53	935.495	515.868	535.337	408.382	840.351	700.89	651.131	8279.55	6644.07	3371.59	2197.68	5607.83	727.567	4949.45	6199.79	5750.13	4525.79	891.578	1246.22	648.456	2898.09	886.3	512.487	2252.03	506.792
pos_2142	Pelargonidin 3-O-[2-O-(6-O-(E)-feruloyl-beta-D-glucopyranosyl)-beta-D-glucopyranoside]-5-O-(beta-D-glucopyranoside)	2377.64	2249	4175.77	1453.52	999.256	1375.01	953.527	1729.63	1817.64	1381.95	1951.25	5129.9	2740.98	1136.46	2394.37	1414.91	1156.26	1159.92	1884.38	1339.03	1794.48	1419.8	1330.21	2904.59	1598.81	1871.8	1370.3	2643.6	2212.74	2052.56	27143.1	23414.1	11520	7389.67	20411.4	2427.93	15530.5	20811.7	20148.2	15219.5	3004.92	4085.81	1943.76	9539.26	2907.3	1681.41	7561.97	1564.58
pos_2143	NH-DVal(NMe)-Val-OMe	416.454	326.497	436.156	413.936	253.267	314.742	243.15	290.568	336.277	295.276	557.582	460.215	327.267	348.784	340.142	320.695	285.273	382.589	413.976	457.013	408.045	301.716	354.91	370.368	275.914	272.026	329.671	179.274	331.044	247.419	47.8922	64.1074	140.944	117.747	107.608	127.69	108.427	80.9895	59.171	73.6295	113.714	93.722	71.6094	44.3732	87.603	52.5952	33.669	74.2506
pos_2147	GDP-beta-L-colitose	4060.7	4273.22	4606.81	3679.56	3122.32	3872.96	2613.62	4804.24	3869.82	3486	3905.44	4188.89	5361.62	5215.11	4434.09	4415.81	4377.43	4835.7	4818.15	3999.04	6428.53	5015.66	3716.1	4691.03	5709.54	6075.44	5382.09	5564.55	5289.17	6684.73	5423.52	5050.08	3721.08	4985.88	5213.43	4325.42	3982.06	4370.5	4262.41	4106.04	4965.91	6272.8	6064.66	5252.75	7164.24	5280.68	4657.26	4964.73
pos_2151	Pelargonidin 3-glucoside 5-caffeoylglucoside	5459.54	5062.44	5940.36	6274.46	4766.26	3508.23	5188.27	3091.9	3607.33	3568.02	3231.42	3618.43	5002.45	4255.21	5392.44	5138.51	3496.19	4015.11	3634.66	3282.2	3827.59	4225.01	3875.89	5348.8	3449.6	3409.54	3827.57	5207.86	3935.56	4349.83	3669.66	4208.44	4971.08	5974.63	4272.35	7939.44	3296.97	3083.11	3139.45	3704.75	6602.88	5588.76	5225.59	4029.2	5974.54	7441.3	6740	7967.86
pos_2155	4-Ethoxy-3-methoxybenzaldehyde	10284.1	8086.58	5127.67	7816.01	7948.05	10425	8335.97	5822.88	14967.8	6745.45	10013.8	7898.47	5144.64	5397.98	6034.37	5439.51	6582.7	6208.74	12153.6	13098.2	8702.23	8504.09	11794.5	10029.4	9760	7963.39	9844.88	6970.89	6446.79	7164.39	9471.12	9906.8	7055.11	7490.85	8952.01	8957.86	6235.28	7025.09	7400.15	6051.24	7654.93	8480.11	6865.75	5556.58	6661.01	7019.89	5818.63	8193.01
pos_2157	Valyl-Phenylalanine	101.029	122.904	122.694	107.272	72.4504	91.2071	69.8476	113.163	98.4911	117.62	133.182	105.496	89.5796	79.2596	102.678	80.2291	97.9053	92.035	112.44	109.175	91.6932	85.0493	127.385	129.961	101.563	118.559	95.0519	119.49	125.756	105.376	14.5005	16.2275	53.0571	52.5389	29.0602	69.5817	42.2131	49.0613	42.5664	39.2894	38.8852	42.846	62.4384	46.2583	50.1238	53.838	32.1328	68.7249
pos_2163	cis-(Homo)3-aconitate	2077.86	1835.33	2336.66	1710.27	1514.15	1586.9	1491.68	1844.65	1669.4	1544.3	1713.35	2108.36	2112.13	1836.41	1931.66	2020.53	1670.69	1571.91	1813.76	1798.97	2004.3	1911.41	1587.05	1932.59	1913.09	1858.51	1722.34	2108.69	1722.81	1873.23	6152.11	5448.27	5966.78	4611.44	6379.52	3591.64	4954	5184.73	5945.24	5766.22	2868.83	3055.66	2417.02	4064.57	2593.02	2228.51	4888.08	2547.33
pos_2170	2',3'-Cyclic GMP	65.8037	19.1015	43.6345	7.28843	25.7739	59.3117	81.6801	94.7682	91.4775	40.5965	66.9512	124.783	76.3096	27.1588	52.4649	63.7062	44.5139	15.9002	47.2371	31.3654	38.3148	25.3191	11.828	48.7876	26.5017	51.0994	27.0929	70.3767	69.2421	43.8291	498.093	471.18	372.928	294.549	367.901	168.257	452.371	509.765	531.854	405.947	150.966	216.286	121.124	341.237	116.729	88.2703	315.266	95.864
pos_2172	7-Methylthioheptyl-desulfoglucosinolate	3545.46	5715.46	4559.6	5082.65	3804.9	4870.21	4333.32	4354.23	5153.17	4135.85	8244.95	5703.28	4848.78	5968.26	2917.26	3963.5	3764.05	5141.89	3605.65	3787.27	3930.83	3624.72	3921.61	4097.81	6986.51	3702.79	5653.72	10474.4	12379	9278.65	7915.59	5613.77	6144.56	4814.25	8630.97	12070	11846.7	18411.2	14089.1	13320.6	5217.83	3705.55	9185.02	10101.6	4277.74	6779.21	10793.6	8048.3
pos_2175	Cys Asp Arg Asp	18472	30351.7	53706.8	29561	12357.8	16816.2	7859.72	27688.2	9210.73	19996.6	20056.7	29222.5	31433.2	22849.8	34635.7	26030.1	20803.8	22088.2	31723.1	24589.6	30683.8	26967.3	25063.7	30919.8	30127.4	28492.7	20748.1	25923.4	30402.5	30481.4	8873.09	9319.58	14562.1	24166.8	9228.51	19562.9	28373.3	24128.7	23564.3	23757.2	22487.7	18684.9	23355.5	34625.6	28183.3	23960.6	36847.8	26066.7
pos_2179	Carnosine	3240.75	4184.6	3878.22	3956.92	2467.34	2733.82	2640.02	2986.1	2640.5	2832.23	3030.38	2881.49	2897.21	2748.52	2938.28	2716.79	2629.19	2778.01	3148.7	3067.48	3009.88	2763.49	3049.89	3213.06	3083.76	2848.3	2953.47	3420.49	3469.85	3497.3	1654.44	1417.29	1642.6	1533.46	1797.93	1789.53	1854.09	2014	1896.36	1834.75	1471.97	1550.54	1901.13	1774.14	1574.73	1761.07	1907.67	1962.62
pos_2183	1,2,3,4-tetrahydro-2,5,8-trimethyl naphthalene	3285.58	4470.53	3806.24	4528.78	1876.48	2184.43	1839.76	2768.75	2687.92	2168.05	3082.09	2708.8	3054.44	2566.3	3777.52	2488.97	2207.2	2870.16	3882.21	3318.58	3317.53	3005.6	3172.04	4517.8	3408.5	3095.78	3133.17	3309.59	3201.56	4555.76	506.568	465.46	417.807	954.611	499.713	1202.99	646.459	643.901	638.463	726.469	941.795	926.562	1024.36	590.447	992.061	934.918	566.698	1045.35
pos_2184	4-Hydroxyphenylacetate	562.787	388.645	635.595	380.608	385.646	469.402	220.12	704.23	293.211	490.172	332.151	514.899	784.885	538.388	581.792	615.873	584.643	535.513	486.116	381.387	674.551	698.158	411.728	496.452	629.494	758.229	623.597	704.673	637.875	541.932	399.196	398.554	632.604	633.249	494.44	445.258	465.686	465.933	383.531	400.387	623.687	498.912	411.022	547.781	488.957	493.688	598.262	531.624
pos_2185	3-(4-Hydroxyphenyl)pyruvate	7973.02	6232.41	9310.83	5895.03	5150.6	6406.25	3434.21	9039.89	4592.18	6709.95	4839.5	6909.4	9825.02	7058.94	7696.67	8062.01	7718.35	6921.31	6974.19	5594.47	8703.05	8760.51	6002.09	7164.81	8334.66	9360.31	8028.96	9122.76	8529.63	7538.65	6232.36	6094.43	9805.85	10230.4	8266.7	7245.15	7055.25	7114.11	6348.35	6330.36	7827.39	6533.92	5802.31	8160.19	6689.22	6615.52	9193	7179.62
pos_2188	4-Hydroxy-3-methoxycinnamic acid	47029	34758.9	52037.2	34098.2	28627.8	35698.7	19375.5	44501.3	24871.7	37295.9	26462.9	37371.8	47597	34899.9	44686.1	43779.3	39182.9	36283.1	36319.7	30721.7	46152.4	45312.2	33864.1	38323.4	41126.1	46453.3	39801.6	48031.8	46490.8	39522.7	24034.4	25159.6	42334.6	50244.2	34438.4	33798.6	29712.7	30668.1	28560.4	28613.5	37709.7	31206.1	27525.4	37443.6	32039.5	32244.8	42676.9	34447.8
pos_2193	Methacycline	2781.35	5181.81	6065.88	4399.74	2950.96	3535.35	1875.74	4572.74	3709.24	4016.14	3026.65	3354.03	5465.5	3850.49	3961.02	4533.42	3823.96	4132.7	3547.93	3358.1	3557.9	3289.97	3074.44	4240.15	4421.82	4042.07	3891.27	5341.95	5656.17	6110.81	8184.33	7864.15	6931.44	7139.74	10704.4	6313.64	8795.13	9188.28	8803.29	7867.15	12927.3	12022.7	14307.4	10856.7	20016	16684.1	11652.6	17519.9
pos_2197	3-Methylcrotonaldehyde	190.412	343.358	249.175	326.767	203.158	210.591	246.323	193.172	139.062	192.766	181.232	191.604	195.362	178.229	214.889	158.349	178.379	187.124	247.981	247.875	187.548	196.75	228.587	188.23	200.651	180.661	190.99	204.406	189.008	188.353	77.1168	72.19	85.1631	123.052	62.226	179.521	95.0077	84.2418	93.1873	78.0281	172.219	189.651	178.945	90.6648	143.818	170.807	94.5074	201.603
pos_2198	4-Hydroxy-2,5-dimethyl-3(2H)furanone	192.543	148.899	185.917	126.035	138.502	115.525	100.633	205.415	58.6884	137.358	156.455	124.21	185.185	184.175	127.789	117.109	107.114	136.841	164.875	183.37	216.748	238.192	204.882	187.227	188.072	165.057	124.134	127.915	75.9732	152.565	21.8412	28.9546	14.1026	25.6422	20.0665	59.1959	35.504	32.1198	26.547	57.7124	57.6717	66.4628	72.2202	40.6882	83.5231	50.0793	49.0846	62.8575
pos_2199	8-Methylthiooctyl-desulfoglucosinolate	9424.21	12792.5	10478.2	12153.1	8075.43	8636.17	9062.63	8438.2	9550.89	7804.76	9115.14	7887.61	8820.57	8995.36	9574.99	7409.12	7476.49	7995.73	9824.85	10022.4	9804.96	8964.08	9296.01	10610.6	9738.89	8508.73	9841.46	8075.82	8400.17	9566.04	6312.74	5985.12	5860.42	6308.36	6365.61	8370.54	7047.56	8022.82	6121.36	7220.83	10316.8	10827.4	10931.4	8054.22	11511.5	11360.9	8431.88	12619.3
pos_22	Urate	69.3989	60.8724	59.6754	64.3393	75.4362	65.9915	75.9903	79.3983	60.2785	60.7796	52.1837	56.0436	77.2575	69.706	57.775	56.7832	67.8352	66.8132	60.8429	60.3803	61.2105	53.5322	59.6818	62.0239	72.0826	70.1868	62.0258	61.531	58.8853	67.6248	54.31	49.5283	50.2224	47.7271	60.7941	60.7187	59.5502	58.004	58.4511	58.3693	66.1704	64.2326	55.7248	58.0027	54.5836	52.5944	51.884	73.1391
pos_2201	(+)-7-Isojasmonic acid CoA	5685.09	7546.58	6867.47	5747.15	4143.69	5144.23	3520.51	6440.03	5003.04	5648.04	6388.09	6626.7	5990.52	5093.72	5317.61	5123.11	4771.59	4945.73	6071.44	5435.81	6161.23	5292.38	5431.47	6508.19	6293.04	6036.64	4775.3	5407.52	5885.61	6522.16	12361.1	9475.57	9812.1	8590.6	10931.9	5017.15	9820.77	10153.3	13569.9	11911.9	6498.19	7416.26	6764.75	7568.49	7781.73	6019.16	7688.28	4565.83
pos_2207	Pongamol	4335.27	5475.55	6736.64	5475.98	4179.08	5002.78	4620.83	6536	7137.99	7161.58	7871.64	7513.13	4779.07	4972.51	4175.83	5621.8	4368.95	4969.54	4317.59	3769.66	5155.99	4421.29	4348.1	4913.58	6627.46	5329.98	4895.23	12443.4	11450.1	11303.5	4114.9	3949.04	5554.26	5090.39	5079.06	7381.43	6241.21	7572.57	7162.4	8047.14	5194.74	3538.59	5211.83	7268.79	4109.63	4885.08	7947.3	4556.71
pos_2209	4-(beta-D-Ribofuranosyl)phenol 5'-phosphate	146.514	21.6144	8.00387	17.5671	110.631	90.2805	71.5738	100.249	72.5731	46.0615	87.4265	63.7408	106.492	147.419	44.3713	90.8714	94.2259	114.555	73.5502	138.872	188.356	150.735	119.099	110.004	134.593	118.167	91.2012	4.03168	5.78874	89.6672	143.223	160.907	31.9164	31.2857	109.595	19.5726	51.7352	34.1248	0.387029	67.4908	41.1511	70.9333	48.5777	56.1165	75.0305	32.1197	35.7129	45.3698
pos_2210	Urdamycinone B	1294.98	890.86	832.367	862.678	900.95	845.204	1034.68	978.431	1035.57	860.674	1063.22	853.644	1010.23	1166.48	837.375	888.129	784.44	941.261	1019.39	1165.02	1362.53	1188.61	1061.22	1265.48	1264.93	1043.65	1004.37	800.258	836.474	1260.7	1072.22	976.483	767.982	789.409	977.091	931.203	787.303	779.826	558.259	1055.52	847.942	844.414	856.925	823.461	985.78	860.57	864.327	930.645
pos_2211	Delphinidin 3-O-3'',6''-O-dimalonylglucoside	2943.53	4673.39	4327.8	4323.19	2859	3309.27	1460.07	3845.9	4733.03	2908.51	2779.75	2609.24	3865.89	3639.29	3586.71	3527.21	3598.12	4779.44	2338.14	2193.01	3540.84	3248.23	2450.49	2437.86	3469.74	4121.17	3397.49	3837	3857.56	4440.44	2538.76	2321.49	2565.63	4480.11	2421.9	2658.37	2201.89	2014.81	2107.41	2273.48	3506.41	3096.33	3325.92	3135.54	3522.26	3396.35	2753.64	2579.53
pos_2213	2-Cyclopentene-1,4-dione	162.625	239.148	286.557	228.416	148.539	185.738	247.224	315.967	365.974	333.059	338.797	328.765	204.264	226.699	178.932	192.933	173.64	175.026	195.409	178.846	195.912	174.835	172.469	187.551	304.365	215.507	199.097	748.968	660.048	604.071	196.192	173.553	200.181	193.845	218.776	434.163	327.761	441.534	419.903	396.022	252.559	166.203	282.686	361.458	160.079	221.899	391.208	217.576
pos_2216	Orotidine, 5'-phosphate (OMP)	2.57682	42.5717	90.5949	83.6396	27.7889	74.245	459.624	245.907	1131.54	420.437	418.5	401.727	43.9573	126.292	6.03858	64.3086	15.1471	28.5796	9.03508	28.033	31.6774	17.0948	17.3701	15.4893	190.687	19.1711	48.8293	1150.61	1047.21	891.664	138.489	88.0518	146.453	128.056	119.75	688.825	446.418	577.45	611.641	496.808	255.264	35.2483	288.15	530.429	32.6055	219.001	592.112	110.983
pos_2218	1,3-Diisopropylbenzene	8.77353e-08	31.3547	35.2536	37.9878	8.77353e-08	5.9506	8.77353e-08	11.6892	8.77353e-08	16.6486	8.02127	11.6938	21.1883	4.20397	31.4452	6.9715	8.00988	11.3363	43.4678	18.4587	13.269	10.201	12.4817	37.257	11.892	4.23578	8.77353e-08	5.15204	2.75826	8.01043	8.77353e-08	8.77353e-08	8.77353e-08	8.77353e-08	8.77353e-08	4.13393	3.90233	2.5396	8.77353e-08	8.77353e-08	14.2544	10.9886	15.1192	2.44258	8.58695	4.64556	8.77353e-08	5.25627
pos_2222	Anisole	127.392	167.312	174.41	162.741	67.6295	86.7313	100.622	148.566	115.087	114.703	121.766	118.266	136.346	124.155	140.496	119.023	93.2327	109.382	145.147	148.959	128.544	132.119	149.953	157.694	123.35	123.666	109.595	135.546	111.902	133.553	83.0769	74.5882	77.7915	93.922	79.6316	114.62	111.988	98.2559	92.0109	121.376	143.164	149.863	170.097	99.2066	150.374	132.862	92.3811	159.32
pos_2224	2,3-dihydrobenzofuran	323.835	442.389	482.393	454.748	251.49	282.711	238.247	363.062	213.899	290.505	323.211	339.591	372.38	321.056	428.437	304.232	282.85	311.548	393.792	370.208	340.134	328.373	366.943	413.655	363.092	327.264	331.705	330.115	340.923	352	281.874	263.062	256.936	340.137	278.567	418.094	376.188	332.779	335.075	356.622	525.987	539.784	554.049	313.537	532.749	483.645	319.954	548.985
pos_2225	1-Phenyl-2-pentanol	61.504	80.3863	109.563	84.0216	21.0957	32.1674	31.4066	71.4639	27.4065	48.1478	43.8683	62.192	55.0252	39.7949	95.076	42.7961	36.3811	38.6006	79.1998	57.5935	63.1293	55.5828	70.6986	79.7973	57.0128	43.6606	48.9693	50.6326	57.1107	68.9891	41.2052	29.875	46.7159	62.8871	36.2714	82.9146	55.3959	62.7292	63.9359	68.537	131.209	122.821	137.737	49.5014	152.297	119.406	58.1792	134.336
pos_2228	Arbutin	1668.83	1697.16	1665.29	1507.82	1148.6	1236.06	1285.74	1487.26	1595.89	1473.69	1504.56	1331.6	1362.21	1277.82	1280.57	1340.37	1265.78	1288.17	1399.94	1518.46	1424.76	1321.54	1459.76	1565.44	1549.33	1507.85	1346.42	1371.83	1328.79	1451.64	944.051	868.215	1075.83	906.172	990.313	1041.03	1012.81	1018.58	955.567	1042.12	824.527	803.019	1181.02	889.934	940.577	904.603	916.87	864.546
pos_2229	3alpha-Hydroxyoreadone	4678.81	6659.62	7426.15	6625.43	3480.35	3951.34	3684.54	5454.42	2780.72	4358.04	4413.96	4748.35	5359.93	4245.48	7029.78	4286.76	4020.65	4390.87	6066.24	5512.69	5107.52	4834.98	5419.79	5885.04	5019.83	4829.43	4368.47	4442.7	4429.12	5111.09	4599.71	4195.84	3685.66	5688.79	4458.44	7179.27	6210.05	5253.75	5643.78	6209.98	10510.7	10395.4	10260.4	5355.56	9974.71	9012.23	5596.44	10617.1
pos_2236	IRIGENOL	12672.6	33041.6	54546.6	44948	42600.5	45385.6	23721.9	39067.4	26181.7	43371	28959.2	34820.3	64426.5	57970.6	53091.6	70862.8	62170.1	66547.7	39694.1	26265.2	39091.7	50394.9	42940.9	47878.2	55756	52787.6	66124.8	69510.3	63612.8	67459	36877.1	42338.4	45887.9	54443.6	55753.8	65024.9	46753.5	40374.8	38680	43852.3	100177	71474.8	119978	63957.5	139187	148024	76029.7	135175
pos_2239	(R)-S-Lactoylglutathione	17082.5	30045.8	16223.9	15766	17233.3	21416	4270.21	13106.6	3897.35	16788.1	28992.7	26787.1	29834.2	22840.4	15736.3	26117.7	20898.6	30633.7	14854.8	3217.11	17915.7	14547.6	10942.8	13059	33549.9	33630.2	17139.6	8758.06	23744.8	21009	3983.94	5592.37	10414.1	7384.02	4636.96	8322.79	6221.15	6420.8	5414.07	5650.16	5645.52	4974.43	15573.6	7128.89	8623.36	8062.59	5733.78	4489.19
pos_2241	cefadroxil	6302.26	10539.9	6128.93	5938.08	6092.14	7735.04	1787.83	4854.07	1804.85	6059.75	10376.7	9569.62	10243.2	7968.08	5789.43	9264.27	7351.33	10831.9	5530.81	1688.8	6620.37	5483.43	4267.73	5081.69	11730.2	11776.9	6221.99	3491.28	8564.3	7787.82	2328.8	2650.09	4196.86	2936.13	2488.14	3330.09	2836.27	3026.96	2723.25	2594	2295.09	2081.17	5522.58	2925.93	3247.5	3065.79	2466.15	1966.46
pos_2247	Biotin sulfone	10660.7	12640.4	12894.2	11061.2	11543.3	12955.1	11434	13060.4	13262.6	11094.8	12454.9	13782.4	15680.4	15877.7	12179.5	14197.2	13961.4	14171.3	13193	11852.7	15055.1	13209	10480.4	12987	15575.8	15578.4	15420.4	16358.4	16069.6	17068.3	12723.4	13076.3	10871.6	13282	13443.6	12422.2	10656.8	10963.2	9924.85	9541.18	14598.7	16890.2	15662.9	13863.8	16604	15432.8	12717.9	14242.6
pos_2249	2'-Deamino-2'-hydroxy-6'-dehydroparomamine	343.225	512.617	553.859	517.117	553.6	643.844	603.416	659.397	558.045	647.419	694.306	613.994	697.695	830.35	322.282	704.066	837.282	829.579	510.178	483.231	505.263	538.528	464.796	550.857	587.957	447.164	659.962	527.527	519.065	522.206	612.052	611.398	527.684	380.897	594.183	519.681	580.397	597.167	633.805	484.964	569.251	593.859	475.333	525.472	475.439	501.151	530.421	527.484
pos_2251	Albireodelphin	1598.45	1017.92	1125.96	1280.03	1401.44	1692.66	515.504	1823	1675.32	1802.35	703.488	659.774	1250.48	1286.14	1087.99	1598.49	1591.81	1874.71	644.055	495.266	1341.1	1259.55	749.229	636.986	1135.48	1243.67	1399.93	898.429	976.942	1395.44	447.436	497.048	683.405	2366.23	462.362	1154.06	792.781	780.313	628.71	608.19	1402.17	1172.74	1182.18	1329.17	1670.83	1551.77	1233.63	1142.74
pos_2254	L-Dihydroanticapsin	177.585	148.73	130.579	124.527	170.337	196.769	126.637	240.571	128.95	286.26	195.652	195.541	257.496	257.498	121.387	214.244	270.437	204.699	142.005	93.0154	142.428	113.544	124.799	172.776	246.315	198.892	132.656	121.723	156.578	135.557	83.2006	91.8619	127.971	90.3541	116.825	247.21	209.053	106.987	150.819	142.902	132.91	99.8607	141.21	107.959	137.575	88.6027	116.363	48.4021
pos_2255	Lidocaine	2891.71	2207.07	2593.47	2652.18	2570.83	2083.6	3384.74	2343.51	2719.45	2677.13	2585.14	2660.25	2472.47	2471.45	2687.28	2484.35	2407.98	2545.37	2620.51	2494.61	2501.87	2688.28	2574.01	2735.17	2344.29	2453.61	2354.04	2549.07	2415.74	2730.1	1436.77	1563.24	1850.97	2041.99	1366.05	2055.7	2280.98	1888.67	2177.35	2238.58	2461.89	2466.65	1906.26	1863.78	1999.61	2003.27	1830.41	2166.61
pos_2256	Cnidilin	6872.75	7859.42	7996.35	7064.22	5126.71	6292.17	5082.09	6382.34	5208.57	6075.8	6830.74	7272.41	7018.17	5853.95	7999.91	6416.08	5448.59	5824.51	7198.35	6390.79	6831.5	6234.11	6535.39	7223.18	7441.88	6698.9	6152.81	7060.48	7108.2	6859.72	5623.31	5001.97	6763.86	6392.11	6136.33	6114.99	9436.76	7482.28	7784.51	7365.67	6268.59	5671.35	5216.85	6826.03	5244.74	5089.4	6835.76	5254.02
pos_2269	p-Mentha-1,3,5,8-tetraene	1317.43	1324.05	1328.16	1194.18	912.046	982.642	717.077	1503.99	1146.39	1323.91	1379.82	1017.91	1251.47	1209.7	981.642	1205.88	1056.93	1378.73	1355.2	1401.86	1959.01	1721.77	1517.66	1566.87	1651.71	1475.17	1311.69	1137.36	1334.09	1825.8	596.463	578.577	369.056	579.615	524.474	844.904	739.859	732.036	564.741	895.898	1341.52	1406.27	1784.46	888.695	2270.64	1633.37	880.601	1585.44
pos_2271	Versiconal hemiacetal acetate	543.443	561.126	527.005	441.869	363.962	604.342	358.849	532.21	518.52	493.525	823.625	986.801	662.601	458.767	671.65	543.322	387.936	460.01	532.855	355.32	690.63	415.36	434.51	511.435	603.954	560.814	434.519	554.883	699.669	630.362	576.671	554.5	624.802	564.623	629.051	361.395	1046.65	742.824	776.378	985.164	352.549	406.896	444.294	707.298	475.856	428.894	623.482	325.991
pos_2273	3-Hydroxybenzaldehyde	1945.81	2760.21	2824.26	3069.05	2361.95	2391.12	2963.11	2122.59	2698.19	2665.51	2242.47	2224.32	2527.44	2718.13	2378.76	2587.52	2928.8	2734.12	1877.44	2313.61	1492.38	1824.03	2313.98	1723.09	2103.72	1914.3	2144.71	2948.18	2637.58	2403.91	1020.37	1134.24	1205.73	1532.66	1334.33	2115.15	1119.07	1653.81	1337.67	1220.98	1884.75	1842.69	2232.16	1481.7	1719.08	2071.62	1612.03	2470.09
pos_2275	Megastigmatrienone	999.727	1050.68	1155.26	968.349	705.971	800.225	416.306	1184.67	673.576	981.91	1080.49	820.923	1051.64	1037.35	872.727	983.852	878.503	1156.57	1107.14	1063.65	1553.36	1335.5	1141.15	1247.82	1361.58	1258.19	1104.77	1068.91	1319.09	1771.5	143.86	128.334	63.0509	169.518	142.585	281.83	241.925	226.187	172.168	265.341	468.309	463.218	739.345	289.265	856.295	648.102	309.829	639.95
pos_2276	2-Hydroxy-3-(4-methoxyphenyl)propanoic acid	9198.73	12235.9	12966.1	13648.5	10387.3	11057	11712.1	9084.04	11208.2	11467.8	10359.1	10416.6	10387	10563.2	10559.4	11218.5	12419	12234.2	8852.32	10017.8	7563.88	8499.07	10400.7	9027.41	9496.5	9026.55	9889.45	12633.8	11935.9	11422	5298.73	5649.41	6241.19	7351.85	6767.67	9384.24	5549.16	7521.52	6700.44	6278.93	8711.38	8518.57	9492.67	6665.96	8421.8	9374.82	7685.65	11034.7
pos_2281	Puerarostan	6654.8	7104.97	6713.46	7731.19	6271.21	6551.21	7008.82	5533.69	5871.96	6482.89	6759.08	5666.04	5525.98	6246.92	6303.44	5860.26	5736.67	6421.57	6358.2	7533.08	5908.31	6506.8	7377.97	6614.92	6727.5	5853.44	6760.71	6357.24	5971.74	6126.28	3198.69	3199.6	3864.94	3815.56	3387.42	4535.75	3633.09	3755.54	3491.54	3667.81	3991.85	3965.68	4330.15	3572.05	3830.84	4089.86	3742.25	4481.53
pos_2282	2,3-Dehydrokievitone hydrate	21412.5	25967.8	27552.3	27410.5	20480.4	22688.9	24323.4	21435.8	24487.8	24555.3	20815.3	21906	23437	24112.2	23492	23090.7	24072.7	23714.9	19902.1	22142	16838.7	18829.9	21740.1	19117.5	20965.3	19106	20722.4	25424.1	24476.9	22935.4	15358	15019	17970.5	20177	17294.4	23713.8	18424.7	20630.1	19354.3	18293.8	21864.6	21562.3	23663.3	18398.4	19743.2	22736.4	20841.1	25931
pos_2285	Benzene	439.889	654.666	642.633	673.683	508.226	512.841	614.215	530.958	590.133	593.854	532.04	510.877	638.419	629.717	539.769	574.234	636.203	616.846	492.166	550.1	371.41	421.169	549.111	433.613	534.324	460.082	486.392	647.228	579.468	574.882	233.955	240.158	256.284	333.319	281.932	443.718	267.958	339.96	278.747	269.769	403.701	407.859	515.017	294.716	394.877	462.679	343.445	559.343
pos_2286	Betanidin	1709.18	2780.88	2724.9	3276.13	2204.78	2435.84	3243.86	2175.55	3140.45	2848.89	2163.68	2127.65	2507.02	2704.12	2353.65	2467.82	2867.79	2548.44	1872.58	2532.12	1364.54	1638.01	2219.82	1554.21	2083	1733.54	1880.89	2682.74	2529.25	2168.23	1252.4	1193.39	1215.06	1395.28	1280.36	2018.95	1128.01	1448.9	1221.77	1224.41	1577.44	1529.61	2255.68	1312.76	1387.47	1825.7	1376.8	2235.74
pos_2290	dTDP-D-mycaminose	1941.68	1645.68	1650.09	1613.25	2377.71	1994.1	2922.03	1879.56	2674.92	1998.49	1459.38	1901.98	2030.77	1788.41	1933.58	2034.8	2062.07	1724.1	1981.06	1592.44	1764.12	1679	1514.78	1791.71	1859.67	1814.55	1902.72	1867.54	1837.76	1802.28	2726.29	2790.47	4103.03	3257.11	3917.07	3177.99	2712.4	2682.09	2440.7	2647.81	2677.01	2231.49	2539.23	3020.46	3083.85	2944.95	3470.55	3051.3
pos_2292	3-Amino-3-(4-hydroxyphenyl)propanoate	400.9	412.062	437.013	388.724	498.865	564.617	731.019	406.721	593.297	490.518	849.613	638.319	392.939	397.638	319.6	381.492	355.576	392.406	397.827	407.483	370.776	377.348	371.888	414.574	434.679	392.264	443.137	358.757	367.201	368.09	673.62	688.057	843.631	367.764	569.569	512.457	773.06	533.77	899.689	710.092	739.663	777.689	634.786	274.941	389.976	450.527	333.438	667.515
pos_2293	Asp Gly Ala Phe	521.608	579.822	790.298	659.998	405.592	481.395	286.712	600.855	316.784	523.27	522.419	552.2	661.259	612.778	697.816	548.755	465.903	557.719	642.379	520.569	513.711	528.751	564.216	638.34	585.814	540.448	548.516	582.278	554.444	701.502	187.464	161.489	201.024	364.896	171.647	182.627	219.493	214.765	170.272	215.015	289.269	279.268	349.745	233.563	393.953	346.607	212.737	354.424
pos_2294	CDP-ethanolamine	41.6091	66.588	47.5318	80.4335	95.4612	51.3437	130.922	68.2235	97.8541	91.3576	55.2326	21.7952	75.0673	87.7272	68.2552	59.955	85.4096	29.1906	66.4944	73.622	8.77353e-08	34.5205	46.6636	8.77353e-08	73.7675	95.4105	65.898	58.6362	43.006	15.9393	136.42	93.6802	90.6806	63.8272	60.981	42.2778	82.307	97.049	55.674	77.1695	19.4186	32.5443	82.0405	75.7106	36.6567	64.0829	41.3326	36.6909
pos_2295	Quercetin 3-alpha-L-arabinopyranosyl-(1->6)-galactoside	1451.95	4741.41	5872.67	4619.14	1689.33	2050.37	1600.26	2674.34	1897.63	2256.13	2578.96	2887.35	2960.13	2000.19	4892.25	2435.86	2168.11	2250.75	3558.48	2749.35	2624.21	2519.03	2919.79	3695.67	2707.54	2901.01	2498.81	3128.51	3108.38	3600.73	764.642	749.844	837.362	1073	790.047	950.258	970.054	838.054	846.558	943.783	1487.53	1440.14	1740.3	1021.06	1936.1	1760.61	1049.77	1850.61
pos_2297	trans-2-Enoyl-OPC6-CoA	5220.14	6549.9	7606.19	5477.43	3736.97	4207.02	3530.36	5463.41	3919.19	4741.3	4981.76	6135.77	6098.14	4718.9	6114.11	5275.37	4381.55	4227.87	5253.35	4708.41	5562.99	4988.45	4543.57	5933.33	5239.97	5329.96	4631.46	5664.57	5092.58	5567.3	15991.5	14725.9	13543	9386.7	15060.3	6156.45	14971.3	17302.2	16804.5	13902.4	5944.04	6521.43	5253.44	9967.26	5929.94	4830.33	8911.68	4561
pos_2303	Phenethyl isoamyl ether	33.2681	128.24	139.386	167.477	34.2727	34.432	21.7611	100.012	58.5214	59.9753	70.5017	33.4702	65.9988	70.5702	50.3109	41.8386	53.8914	63.6619	90.3026	80.0283	73.2633	70.8937	49.1942	100.916	88.4794	84.6222	85.9458	47.762	53.3016	107.93	387.581	395.624	171.984	386.76	299.199	580.911	469.885	476.23	354.22	609.139	1034.53	1101.37	1236.98	599.808	1721.43	1190.37	612.689	1072.64
pos_2306	Myricetin 3-(3'''-6'''-diacetylglucosyl)-(1->4)-(2'',3''-diacetylrhamnoside)	16100.7	10822.4	11308.8	6356.82	6268.05	7641.49	6369.84	12534	8613.35	7835.77	12582.7	12723.5	13450.5	9337.47	13810	9695.08	8982.79	9312.58	15636.5	14880.5	16215.9	10735.3	9332.07	15161	12844.8	14045.5	11573.3	9742.84	8642.1	14281	19283.9	22824.7	8203.52	6297.22	19031.5	4614.51	9386.44	11440.4	4951.22	15889.6	4507.41	9711.46	4946.75	10614.3	5430.95	3281.85	7421.77	3805.27
pos_2309	4-Methyl-3-penten-2-one, 9CI	21.6816	43.9523	35.2912	41.1852	13.861	16.7242	13.7231	27.0908	16.0495	15.7964	12.9976	10.3987	17.5524	13.2531	22.5125	12.6925	14.3138	10.8742	31.3945	30.0158	7.10297	10.7752	18.2578	25.537	19.8096	15.5119	12.2424	11.2767	16.3982	17.5348	38.4097	40.5214	18.9721	32.7529	25.6692	52.7797	50.4706	47.5883	36.33	60.2385	111.72	117.906	124.727	69.6728	187.499	134.706	67.4241	119.36
pos_2311	UDP-N-acetylmuramoyl-L-alanyl-D-glutamate	1198.22	1328.48	1717.13	1102.93	921.359	1095.14	1127.95	1243.02	1552.11	916.505	1313.87	1867.38	1523.25	1154.84	1310.77	1249.96	996.995	945.183	1508.53	1161.37	1278.64	1017.49	914.969	1351.58	1230.09	1335.73	1163.93	1926.65	1703.02	1610.13	4420.45	3608.31	2894.62	3056.94	3345.63	1458.03	3292.94	3341.47	3619.76	2989.02	1775.75	3064.06	1798.86	3054.56	2248.09	1604.53	2810.65	1888.07
pos_2313	Eucarvone	159.202	191.788	240.342	162.557	73.4214	98.1588	63.926	174.54	163.902	135.687	149.271	223.544	194.178	115.428	189.296	140.113	114.454	119.528	168.174	145.244	181.326	156.468	142.844	183.203	169.469	182.811	154.414	156.511	133.373	162.404	72.9405	65.6397	77.6959	90.5588	104.22	124.018	112.804	120.29	105.774	113.168	110.935	113.033	141.749	117.991	156.691	147.019	116.678	90.3988
pos_2314	Dihydrosanguinarine	3234.38	4147.77	2986.9	3239.5	4365.06	4395.06	1710.36	2816.89	1593.37	3314.31	4236.6	4060.66	4162.02	3657.16	2910.04	4251.22	3249.89	4553.55	3223.19	1535	4194.38	3507.21	3507.54	3919.5	4687.91	4174.06	3564.01	2565.43	4110.93	4146.9	2461.8	2951.72	3444.07	3713.96	2526.57	4234.95	2880.16	3105.81	2780.72	3297.51	2850.08	2422.29	3585.9	3742.31	3897.8	3450.63	3957.22	2763.37
pos_2321	1,2,3,4-Tetrahydro-2-methyl-b-carboline	735.669	747.792	947.1	715.092	496.087	581.031	443.224	682.578	553.896	613.377	656.467	821.239	732.736	518.248	700.543	668.075	569.392	604.288	726.44	654.823	733.205	700.934	692.48	775.672	754.831	726.469	711.692	802.88	701.425	788.469	395.411	385.689	638.692	499.513	584.032	547.596	524.249	487.77	546.651	482.641	507.918	463.908	469.019	464.586	492.924	462.247	565.168	493.745
pos_2325	2,5-Heptadien-1-ol	33.7036	28.0652	28.8	21.3859	27.4191	25.0134	32.7005	31.5086	35.2217	28.1464	38.8551	30.9219	29.7718	30.7228	15.1927	25.3366	33.515	34.5618	22.2998	30.0781	33.4421	37.5259	33.7956	30.7853	37.3162	28.2152	31.3382	27.1307	29.0288	49.1917	22.0582	22.5992	8.05648	16.8216	18.3489	22.4357	20.6602	19.5479	14.3323	29.7933	25.4793	18.719	22.2966	21.1241	40.0427	26.0012	23.3791	22.7114
pos_2331	Benzyl alcohol	371.622	535.682	519.284	483.397	315.79	354.739	310.178	455.339	338.016	414.838	377.142	319.866	363.597	399.63	338.515	357.318	326.851	369.17	401.356	410.469	355.629	351.856	446.659	412.829	474.807	438.047	379.898	413.89	488.015	541.08	90.7158	92.6904	125.433	121.902	108.578	178.632	141.309	106.953	91.2563	126.43	165.395	134.431	215.784	107.947	198.415	200.698	120.895	194.538
pos_2334	3-[(3aS,4S,7aS)-7a-Methyl-1,5-dioxo-octahydro-1H-inden-4-yl]propanoate	928.959	1035.1	1036.1	846.016	1133.09	860.493	789.635	1101.18	590.178	863.241	1159.42	1059.56	1204.29	1161.89	821.072	1136.01	731.004	1089.79	923.964	873.287	1113.68	1113.77	1141.54	1278.72	1236.9	1178.01	900.665	690.826	953.072	1124.65	664.671	609.013	548.465	538.806	623.165	506.931	579.346	558.447	510.08	663.159	547.249	534.511	687.258	551.201	869.64	591.902	588.803	643.619
pos_2335	Macarpine	4114.58	4903.15	4198.55	4528.61	4149.26	5197.89	5107.32	5324.4	5133.34	4632.75	5923.18	5416.14	4751.24	4643.28	4819.73	4356.93	5066.06	4481.77	6133.84	6117.03	4716.66	4551.86	5462.93	6068.24	5063.01	4824.21	5392.85	4504.37	4852.91	4970.96	2384.5	2526.18	2882.53	3496.2	2581.96	3419.71	3439.98	3146.11	2923.38	3229.93	4520.02	4542.95	4718.93	3863.51	5096.58	5298.17	4015.79	4862.37
pos_2336	CMP-3-deoxy-D-manno-octulosonate	2508.18	2318.42	2249.29	2244.79	2349.87	2679.7	2976.27	2524.19	2785.58	2587.96	2742.02	2753.51	2788.54	2716.97	2727.66	2620.96	2693.77	2365.08	2791.72	2760.61	2613.05	2773	2601.97	2598.36	2601.82	2499.97	2739.72	2686.91	2405.08	2300.58	1718.6	2109.75	2413.66	2981.74	2390.4	2852.48	2662.45	2217.25	2239.49	2646.88	3129.51	2695.03	2847.52	2576.54	2981.59	3149.29	2981.44	3703.11
pos_2339	(S)-Hydroxyhexanoyl-CoA	5848.54	7097.52	7601.69	5529.7	4072.44	5444.88	4011.54	6802.35	7531.42	5670.32	6643.34	9393.98	6302.72	4412.16	5461.49	5151.08	5387.71	4820.48	5364.64	4753.18	4960.5	4365.9	4231.79	6114.77	5430.55	6185.33	4965.04	7077.77	6586.8	6454.8	53038.9	49379.5	27909	14994.1	49258.4	6776.5	37513.9	50179.1	43760.6	33778.8	8585.6	11715.8	7928.6	23366.3	9767.53	7534.24	18242.4	6928.71
pos_2340	(1R)-1,4,5,10-Tetrahydrophenazine-1-carboxylate	2162.04	2109.48	1925.7	1864.43	1362.48	1459.06	1270.58	1479.54	1483.53	1647.72	1362.47	1323.12	1426.71	1384.18	1820.19	1397.82	1222.21	1335.68	1552.44	1666.64	1519.13	1488.47	1677.86	1886.14	1606.97	1461.91	1410.57	1529.1	1556.64	1400.75	1695.12	1420.18	1844.34	1404.84	1925.67	1228.07	1563.33	1769.79	1766.56	1437.61	1168.4	1211.41	1160.91	1271.75	1248.74	1088.18	1356.88	1239.37
pos_2344	ALIZARIN	1010.67	1106.11	1333.3	998.479	709.281	745.289	759.804	939.538	1063.83	805.909	985.731	1276.92	1096.89	774.371	946.803	970.57	705.798	767.121	994.544	962.423	828.126	750.712	826.34	1058.61	916.206	840.963	805.288	1139.55	961.423	983.619	3407.56	2868.86	2565.55	2057.77	3349.88	1020.57	2690.85	3071.35	3482.58	2610.09	1212.44	1460.57	1034.91	1953.52	1182.8	1071.71	1922.06	1141.05
pos_2346	Cyanidin	17910.1	17955.5	33085.8	15272.9	10340.5	13781.5	14215.1	16095	17424.1	11255.4	20046.9	37013.3	27666.7	11873.2	18233.4	23103.9	12087.5	11497	16764.6	13685.3	13229.4	11983	11130.9	20957.8	12598	14465.9	11984.8	32277.7	17145.2	15349.8	130652	116467	99146.4	75946.9	125245	30758.3	96464.4	114410	135169	104152	30861.1	48220	21559.3	59076.8	29113.6	19366.2	58931.1	26362.2
pos_2352	5,7,3',4'-Tetrahydroxy-4-phenylcoumarin 5-O-glucoside	34405.4	37212.8	43288.9	39292.8	32764	31831.7	39116.9	30975.7	34899.5	31425.7	37525	39346.4	35329	31212	32448.7	36167.7	28521.5	32953.2	30420.3	30248.6	33034.3	33879	32334.5	34258.6	34254.5	34258.3	31544.9	34475.7	29253.4	34471.2	60163.2	61577.4	53553	47755.7	57015.1	39204.4	47151.7	54776.4	60124.3	57562.5	36856.6	44595.2	33817	40867.1	36251.2	30758.2	41492.5	38164.9
pos_2357	Celosianin II	6201.55	5085.02	6105.44	5290.56	8980.85	5110.81	10375.6	5780.59	8390.34	6293.87	5530.36	5214.82	7577.12	8238.74	5812.84	8761.19	6948.83	8073.8	5332.01	4060.68	7241.28	8193.35	5713.39	6661.35	6478.64	6062.43	7062.35	7737.59	7123.42	9934.36	5547.89	7162.13	10356.5	12900.2	8778.76	12858.7	6521.58	5358.4	5303.65	7570.06	14936.4	10613.6	11664.9	8947.52	17952.8	16414.9	12848.9	15568
pos_2362	Butein	9558.5	9356	10706.9	8612.71	7664.6	8033.48	7190.2	10031.5	8526.94	10114	8277.63	7637.67	10318	9615.37	8769.46	9747.98	8702.35	9286.94	9479.34	8873.6	11131.9	10605.9	8872.34	9831.21	12651.7	10958.5	10130.8	10018.3	10308.1	12219.4	7440.3	6800.48	5242.25	6852.44	8075.55	8465.38	7931.15	7055.01	7142.26	8495.17	9626.76	9362.98	13299.6	8713.4	13343.8	11207.6	9459.18	12396.4
pos_2364	Netilmicin	4731.1	2859.49	1601.84	2752.25	2109.79	1075.46	12946.8	8104.98	43045.1	11081.5	1640.81	1804.82	806.555	993.898	1448.98	933.685	962.05	951.425	2074.8	7188.36	3605.41	3845.47	6879.4	3196.76	1532.62	1131.21	1102.42	723.771	1041.4	933.912	634.406	701.127	765.316	689.72	700.166	1082.68	789.196	767.651	656.467	718.885	1048.4	900.002	860.607	800.898	1058.02	1950.11	866.792	1051.74
pos_2369	Cyanidin 3-O-rutinoside 5-O-beta-D-glucoside	19791.1	14495.6	27129.8	13563.1	9438.8	12501.5	7211.83	15578.6	10315.3	11934.2	10087.1	22326.9	24610.8	13648.6	28256.4	22817.9	14324.4	11372.9	14041.8	8596.09	19812.8	17769.1	11980	20825.6	16143	16405.5	15669.7	22423.6	20948.8	18023.4	20316.9	21627.9	36304.4	75196.4	28034.8	44542.8	35358.9	34188.6	31637.6	26160.5	49200.1	31856.6	16026.3	35797.9	29308.4	22926.5	38332.3	17209.6
pos_2373	1-Acetoxypinoresinol	21445.7	18886	13591.9	17978.7	16827.6	15499.2	22426	11074	12857.6	15573.8	12158.3	13799.7	10868.9	13614	22372.3	11589.4	11308.4	12349.7	16069.7	18368.7	10126.2	12670.9	17747	13082	13095.9	12273.7	13483.5	12931.2	12519.6	9966.86	10523.1	10101.4	8640.19	11578.8	10325.1	15527.1	6505.55	9158.09	9024.46	8062.21	11956.8	13825.5	11819.4	7505.91	7457.3	10889.4	7960.68	15686.9
pos_2374	3-O-beta-D-Galactopyranosylcinnamtannin B1	7643.5	7793.13	18711.3	6971.04	4101.25	5680.31	4417.58	8149.67	4039.08	5614.39	4057.02	13935.2	15964.2	6672.39	14164.4	12162	8364.1	5272.2	7683.74	4901.07	6844.93	6406.97	4606.37	11263.1	6934.95	7556.32	7622.88	17582.3	12320.9	8639.76	10043.4	11813.7	12738.3	16625.1	16575.8	11466.9	10327.1	13461	10348.8	8402.53	12467.8	11724.3	5262.35	11406.7	8119.28	6140.05	10492.4	5551.98
pos_2376	(1R,6S)-1,6-Dihydroxycyclohexa-2,4-diene-1-carboxylate	818.543	1141.07	930.226	1187.35	993.591	1135.55	670.372	842.763	592.816	942.555	654.777	538.057	698.956	843.941	907.744	765.031	745.154	784.946	673.148	697.235	879.355	885.557	752.691	693.492	1061.31	946.999	979.852	881.971	967.25	924.134	201.822	226.931	221.767	281.144	196.998	409.618	315.406	339.113	317.378	298.35	388.762	375.563	381.099	324.865	331.322	381.61	342.211	457.318
pos_2382	UDP-D-xylose	213.105	128.481	78.8176	95.0067	169.69	115.711	52.4868	185.722	166.678	195.189	209.385	95.3219	152.148	191.609	101.543	191.337	72.1474	204.165	152.878	184.336	286.794	311.619	249.799	212.227	297.228	229.017	150.767	96.1371	180.24	362.304	61.275	81.9806	6.88291	6.13853	24.2319	6.55343	10.1295	0.14942	5.82599	52.3971	48.252	90.6073	118.598	29.9828	207.921	69.7024	0.510313	146.237
pos_2383	Rutin	40477.6	35041.1	40585.2	30034.4	25170.7	24732	13691.8	34947.8	25449.9	33711.5	36318.9	28696.3	36910.8	35686.1	27268.8	40576.8	22611.3	39868.6	31974.8	30404.5	54355.5	49350.1	38934.7	43346.2	54176.6	41614.9	33320.2	30358.6	36331	63254.8	30643.3	28345	23783.5	21267.9	28786.3	18222.4	22383.3	21221.9	22139	32146.4	18989.9	22150.5	23457	23706.9	38130.5	21093.7	24607.5	27193.3
pos_2385	Petunidin 3-gentiobioside	6325.55	11514.9	12878.7	12027.6	9834.07	10860.6	3620.22	11006.3	6071.76	13179	8431.61	7182.41	11188.3	11390.8	7909.07	13111.4	12438.6	14662.4	9885.1	8776.79	11304.4	10828.9	10139	9851.73	11863.3	10657.5	11373.1	8381.75	8451.7	11943.5	1688.64	2085.9	2291.21	7373.32	2058.96	3789.08	2956.99	2325.94	1973.54	3282.87	5107.21	5555.85	6043.2	4146.3	8358.51	7115.67	4095.03	7595.18
pos_2386	Myristicin	1368.9	1552.03	1483.35	1596.58	1224.4	1241.92	1320.61	1294.6	1052.86	1388.44	1110.07	1139.2	1291.7	1208.51	2178.32	1220.36	1327.66	1284.53	1238.8	1239.18	1111.28	1190.23	1426.6	1231.44	1254.99	1345.02	1296.48	1467.11	1371.93	1303.24	715.8	738.244	962.588	898.255	791.777	980.04	826.421	872.586	776.974	801.385	903.45	810.319	877.997	802.553	748.375	880.503	858.655	928.859
pos_2388	1-O-Sinapoyl-beta-D-glucose	2921.75	3479.86	3532.39	3686.36	2694.51	2762.2	2744.61	3195.75	2292.16	3293.99	2450.29	2714.39	3269.47	2938.97	5805.54	3059.32	3265.48	3152.38	2780.97	2758.1	2909.08	3017.25	3365.36	2770.69	3051.29	3286.71	3171.12	3432.85	3263.49	3203.61	2089.69	2069.44	2406.78	2286.06	2169.49	2835.52	2217.08	2401.54	2185.28	2253.87	2190.35	1918.85	2171.79	2050.61	1824.39	2105.12	2113.7	2262.44
pos_2391	Harpagide	15267.1	13729.7	11644.8	13752.7	10983.4	12938.1	11537.5	11884.6	7973.71	12451	11899	10953.6	11562.1	12743	12796.1	10987.1	12065.7	12923.1	13023.5	13591.4	12545.5	12756.5	13637.8	13022.8	12285.2	10766.7	12195.4	10652.8	9948.6	11238.4	7250.43	6711.38	8222.68	6657.8	7084.32	8396.67	6383.8	7795.7	6898.49	6255.23	6871.3	7609.87	7701.02	5887.58	6037.55	6673.23	6296	8510.58
pos_2397	EUPATORIOCHROMENE	1008.17	994.698	1637.17	1010.11	721.556	754.601	719.091	1047.61	779.793	849.797	1029.83	1387.2	1376.11	896.124	1366.45	1333.59	748.206	944.041	1423.73	1243.34	1634.53	1316.06	1322.37	1632.12	1053.37	1128.89	928.922	1537.78	935.128	1035.12	566.133	540.357	782.567	800.369	658.908	846.555	852.649	728.597	724.49	828.409	772.85	708.642	989.946	998.302	980.3	858.695	1087.25	921.142
pos_2399	Mesuagin	1084.68	1388.26	1297.46	1772.22	1054.77	1017.85	1086.46	820.212	1059.58	908.923	802.451	799.769	884.76	911.955	1473.52	900.419	900.306	912.868	992.85	1074.15	756.728	887.119	1085.19	912.727	1026.94	954.406	1018.05	968.781	942.057	874.447	432.116	458.121	505.074	591.25	431.4	622.214	493.607	536.358	470.592	483.801	603.127	595.234	610.637	515.368	589.597	672.744	532.81	675.648
pos_2402	Sinaticin	15704.7	13621	13167.3	12589.4	13240	14917.6	9248.79	15225.7	15379.2	13561.9	9256.01	10148.4	12939.9	14114.3	14443.4	12524.3	13929.3	13973.4	9377.85	9268.17	12493.2	13228.1	9486.99	8661.27	12803.3	13602	14188.9	12811.2	13334.3	12615	5996.69	7322.57	8653.66	15298.7	6620.48	12907.1	11509.1	10302.9	8026.72	9304.06	13920.1	13340.8	12044.2	13888.3	12543.1	13861.3	13133.7	13165.2
pos_2403	C20823	1266.64	1191.24	1100.22	1230.28	940.421	1158.39	886.689	920.071	725.329	1019.82	1193.86	1132.18	934.434	904.549	1213.73	1022.35	1070.46	1075.94	1122.5	1108.04	1340.03	1218.42	1258.92	1078.82	1044.35	1104.27	1069.21	923.715	920.104	948.162	459.972	470.703	560.481	601.399	428.51	616.963	475.565	535.484	505.726	528.308	626.765	620.721	616.572	492.002	609.966	659.301	511.653	704.05
pos_2408	Epicatechin 3-O-beta-D-allopyranoside	2311.92	2548.35	5673.64	2446.34	1731.12	1689.48	1747.24	2118.68	1963.67	1790.72	1685.48	3544.76	3897.66	1976.95	3505.76	3012.62	1909.17	1912.87	2429.7	1865.08	2262.87	2091.12	1847.33	3234.33	2101.8	2178.95	2091.54	4554.89	2951.81	2811.25	3303.52	4374.52	7561.17	5754.33	7281.08	6074.51	5786.3	5377.45	3561.87	5049.06	4992.39	3584.24	2778.52	5643.87	3398.22	3099.37	5916.15	3514.15
pos_2410	Glomeratose A	1051.2	1034.29	3501.96	1025.09	583.814	643.598	578.749	747.378	695.301	647.942	683.38	2311.36	2067.69	626.189	2060.83	1597.98	657.841	611.131	1172.39	848.118	1009.83	796.336	731.967	1756.89	744.335	922.076	832.186	2609.49	1386.97	1205.6	2236.22	3165.56	5309.21	3715.16	5008.23	3968.59	3903.6	4090.91	2680.24	3474.36	2963.65	2005.67	1275.06	3902.75	1632.35	1369.04	3832.59	1750.43
pos_2412	4-Propylphenol	179.67	177.734	163.527	176.929	152.112	146.639	219.639	100.714	146.784	134.482	152.259	160.584	119.337	107.66	195.525	127.098	102.607	127.533	130.1	140.577	87.4502	128.77	163.184	117.509	117.468	105.71	120.005	116.739	115.844	86.3424	24.7732	22.5149	53.3702	79.8229	27.085	84.9312	28.2048	34.5664	38.0871	36.0466	91.2305	97.9568	73.0249	29.8881	62.4768	83.7637	34.2518	84.2118
pos_2414	Thujone	82.2249	39.5731	76.0227	26.4874	21.2886	25.2312	26.13	78.5166	44.0069	48.0298	57.7783	287.219	99.9011	51.5306	70.7924	69.9088	24.3903	31.9029	97.3614	34.8559	75.7032	38.6852	34.4399	81.2698	67.9944	63.7646	44.0982	107.659	127.448	175.991	25.0182	31.289	57.0486	88.7315	48.2898	126.769	73.8229	130.499	93.4515	104.528	198.876	82.5928	57.7298	72.3683	57.8185	64.7253	85.4756	53.134
pos_2416	2-(Hydroxymethyl)-3-(acetamidomethylene)succinate	3202.62	3310.09	4214.9	3239.6	2352.58	2815.71	2941.13	3558.96	4671.16	3144.05	3206.26	3953.88	3449.62	2753.42	3391.49	2846.66	2597.67	2416.75	4025.75	4160.56	2910.24	2738.08	2947.37	3867.79	3439.9	3133.23	2964.1	4228.92	3715.61	3466.79	14242.8	10900	9973.55	6335.82	16731	4396.46	13071.9	12973.4	15636	10361.4	6718.65	7497.4	5743.36	9173.62	5130.65	5465.46	9144.73	5718.69
pos_2418	4-Hydroxydemethylmedicarpin	13924	13432.3	15992.5	12768.8	11777.2	12155.4	10486.9	14509.3	12335.1	13703.6	12230.4	11939.7	15100.3	13779.7	12754.4	14324.5	12738.2	13480.9	13220.5	12210.4	16475.2	15398.9	12792.3	14263.8	17048.6	15537.3	14450.6	14734.5	14884.1	17386.1	10882.9	10488.2	8659.78	11144.8	11720	12401.6	11560.6	10920.8	10262.9	12526.4	13627.5	13367.9	17455	12496.9	18527.9	15975.1	13627.8	17516
pos_242	4-Guanidinobutanoate	244.565	80.8751	45.6373	341.228	256.237	86.6906	179.273	59.2889	124.734	107.35	22.1427	18.1344	11.265	22.8652	170.549	21.8113	20.7456	25.9436	13.917	77.5728	178.061	207.14	44.3707	10.9141	37.473	74.0402	89.2535	28.0685	29.2359	15.1716	19.8778	18.0452	31.3142	107.189	12.866	152.541	36.4636	33.0364	58.5967	16.7342	173.21	313.625	53.3604	26.9445	67.3538	80.6466	42.7869	121.824
pos_2420	Mycochromone	15248.3	20354.6	30339.7	20005.3	13574.5	18455.2	15518.1	25399.3	45525.7	20876.8	16463.7	32431.9	24762.6	16004.3	23961.1	18079.1	17997.7	14491.2	32791.6	34707.8	17343.4	15371.2	18771.7	30331.8	22615.7	22698.4	21689.2	40868	33134.5	26462.7	194619	144941	120753	70358	234461	38541.5	171422	178438	211448	127224	69089.1	82939.2	54782.9	118038	50057.3	57194.5	113372	62406.3
pos_2429	8-Demethyl-8-(2,3-di-O-methyl-alpha-L-rhamnosyl)tetracenomycin C	3765.72	4173.17	3890.99	4158.13	3412.24	3969.1	3034.7	3499.2	2792.97	3252.07	3520.18	3488.47	3452.78	3214.49	3615.55	3268.7	3388.92	3532.93	3435.71	3191.68	3827.09	3890.32	3403.03	3347.49	3576.31	3785.96	3778.42	3367.28	3280.28	3625.22	1607.35	1751.48	1703.39	1804.31	1430.02	1780.4	1755	1657.01	1492.82	1638.49	2120.13	2336.65	2081.03	1898.53	2157.9	2105.13	1863.94	2391.04
pos_2435	Polygalaxanthone III	2489.83	2240.25	3039.64	2163.87	1570.71	1702.42	1644.87	2099.2	1550.37	2001.51	1844.42	2359.22	2452	1892.38	2443.57	2357.1	1854	1608.52	2148.03	1734.08	2312.59	2238.52	1724.66	2046.39	2132.37	2227.35	1967.78	2485.47	2168.95	2247.61	5281.73	5088.91	4411.43	3564.56	4546.3	2279.03	5503.75	6433.05	6602.26	4527.79	2226.07	2695.41	2047.99	3840.76	2271.32	2096.64	3605.1	2114.56
pos_2443	Laricitrin 3-galactoside	35125.8	75853.9	103822	84089.8	50576.1	56251.3	37011.5	58035.4	54124.2	60461.9	43650.4	53112.9	68638.6	55488.3	83913.5	63696.3	60590.6	58333.7	65072.7	58203.4	52777.4	58651.7	61661.6	72959.2	66069.2	62222.3	66243.4	80515.9	65151.3	74847.6	19175.6	23036.7	25426.6	44867.9	22630.6	48399.2	30406.2	26887.1	28008.7	35950.9	71630.3	72889.9	71548.5	43335.2	79328.1	75853.3	46745.1	74705.5
pos_2448	2-Carboxy-2,5-dihydro-5-oxofuran-2-acetate	38.6928	81.7579	86.3979	96.6422	59.355	59.0872	48.2363	73.8487	95.3384	59.6131	47.4689	43.481	67.0431	67.9394	83.4288	62.6997	65.3825	79.2227	76.7787	66.9405	52.9457	73.2191	69.3825	84.9009	94.4489	78.1885	95.7588	88.2313	64.7568	132.435	30.8948	31.3924	31.1332	85.0649	23.1122	77.8776	32.1297	26.9468	27.4062	59.9972	123.161	150.23	120.198	61.6031	141.503	116.607	77.1267	81.7005
pos_2449	Nicotinate D-ribonucleotide	2848.91	4456.57	5351.6	4431.16	3143.25	3356.76	2482.28	3504.36	3696.88	3421.48	2719.7	3170.72	4017.27	3393.05	4340.36	3688.3	3396.7	3521.08	3776.44	3672.74	3428.72	3579.57	3583.43	4122.05	4256.78	3922.48	4011.11	4611.64	4023.6	4571.52	3428.91	3242.04	3251.41	3866.85	3889.86	3788.55	3892.99	3634.81	3899.19	3938.07	4876.58	5130.37	4817.54	3945.7	5114.47	4648.16	4215.01	4633.84
pos_2450	Hypoxylone	164908	309262	380483	314625	219427	243874	161519	252285	232958	253717	190736	219295	302026	246052	316193	267519	249785	257182	272719	251280	227955	235639	244980	291733	296318	259916	273555	320182	271087	319369	120628	125086	143648	221253	132360	240038	179568	145635	151414	190126	318085	323283	319768	216477	340127	317274	240208	325742
pos_2459	2,3',4,6-Tetrahydroxybenzophenone	1179.49	1262.85	1361.78	1269.55	1129.39	1131.59	1152.25	1254.83	1214.87	1147.29	1125.5	1097.94	1346.66	1334.12	1255.25	1283	1127.71	1316.99	1229.05	1152	1309.55	1308.44	1196.78	1286.05	1300.65	1273.01	1229.99	1269.5	1238.84	1452.48	1106.99	1141.92	1082.78	1169.88	1219.34	1219.42	1136.97	987.337	1047.33	1182.01	1271.53	1302.15	1331.21	1142.33	1310.52	1342.63	1316.25	1462.59
pos_2460	Bellidifolin	3016.87	2815.06	3179.3	2843.39	2516.82	2347.46	1709.38	2982.02	2517.87	2551.17	2533.94	2377.74	3158.92	3091.43	2589.73	3036.68	2451.2	3218.22	2557.49	2374.19	3658.48	3457.02	2715.3	3008.72	3356.14	3372.99	2938.33	2870.38	2926.88	3866.05	2406.94	2527.84	2380.6	2571.18	2404.04	2731.72	2307.53	1945.4	1740.14	2823.92	2620.31	2854.29	2978.41	2673.56	3250.66	2696.98	2768.34	3121.86
pos_2467	Quercetin 3-galactoside	94311.5	81338.5	83755.1	83735.7	78616	72372.5	56188.1	85467.4	80761.9	78639.9	71923.5	66194.1	79582.4	82952.9	75533.8	86744.1	71809.5	92785.1	67430.2	67756.4	103659	99694.5	79081.7	81051.3	87159.3	97458.4	86440.7	80553.1	84597.9	101662	60660.3	73922.1	63701.1	72699.3	62877.5	78392.8	59704.2	54402.4	48504.1	78210.6	75541.8	83526	76989.7	79319.3	89540.6	78611.6	78979.5	90357.7
pos_2472	3-Butynoate	192.392	185.591	179.048	164.555	161.525	158.503	139.935	185.41	155.365	153.709	155.33	142.105	192.271	184.073	153.375	158.187	157.353	169.104	168.014	158.301	194.045	178.931	163.943	174.151	197.104	179.825	174.637	183.968	175.915	214.453	157.001	150.797	144.673	152.361	145.206	166.401	144.589	127.71	135.318	155.858	169.086	184.633	188.761	156.567	181.969	161.976	162.211	181.732
pos_2479	3,4,2',4',6'-Pentahydroxychalcone	60166.3	121754	112825	135212	128583	139399	164334	119047	150950	108000	141692	137335	109633	119011	144020	109242	135520	116258	136067	129793	90736.2	103646	128095	138634	103328	105508	133952	113380	89365.7	107039	31068.1	43921.1	29496.7	83683.8	28929.8	95852.5	63049.3	46826.5	53141	57412.4	104478	106191	105795	64342.1	97217.7	126124	66864.6	129710
pos_2485	1-(5'-Phosphoribosyl)-5-amino-4-imidazolecarboxamide	493273	498812	536253	503638	468494	430325	354508	506554	463312	458779	456952	402689	518619	512724	452118	523818	440353	548659	447875	440888	612540	588332	497340	523588	589442	573443	518827	514386	517148	657167	396922	429359	374313	413280	400193	451798	366846	333361	303167	442272	460801	499239	492509	450762	550305	469486	465703	551431
pos_2487	Calomelanol G	3225.01	3607.22	2697.33	3553.4	3546.65	3800.68	4601.14	2776.57	4250.98	3231.01	3656.26	2850.55	2622.03	3475.31	3559.02	2719.81	3167.24	3135.32	3121.55	3498.23	2280.94	2761.74	3365.46	2795.29	3057.96	2565.25	3287.81	2824.22	2665.96	2382.58	1725.77	1771.17	1652.5	1956.52	1563.46	2464.71	2138.87	2025.2	2111.49	2065.27	2432.12	2606.71	2674.86	2071.06	2295.58	2646.59	2242.89	3201.65
pos_2489	Epigallocatechin 3-O-p-coumarate	2434.58	3375.03	4387.77	3565.9	2511.5	2689.41	3021.83	2559.4	2813.57	2503.05	2661.04	3373.34	2713.48	2416.34	3440.13	2639.33	2479.4	2281.8	2725.79	2593.08	2227.04	2479.55	2615.71	3042.06	2520.84	2442.28	2735.15	3230.84	2885.33	2591.64	3682.88	3981.08	2857.78	2830.47	3727.28	2519.67	3254.98	4102.54	3331.03	2836.64	2387.94	2588.12	2050.18	2423.69	1957.08	2340.32	2482.24	2444.92
pos_2490	5-Hydroxy-L-tryptophan	3640.47	4633.8	5272.99	3980.18	2662.24	2928.07	2563.18	4430.38	3490.22	3369.78	3234.66	3961.45	4144.08	3488.49	3610.17	3460.92	2947.22	3163.4	3547.23	3349.41	3432.16	3154.62	3222.77	3914.87	3654.36	3295.78	3356.09	4079.2	3201.2	3603.76	22889.3	18521.1	9089.94	5526.65	18131.6	3268.24	9617.08	13468	12148.7	9633.47	3386.34	4002.11	2943.39	5414.88	3464.04	2884.14	4736.51	3190.02
pos_2500	Psoralenoside	2388.43	2133.68	3145.66	1534.42	980.947	1350.25	1305.12	1750.43	1803.87	1332.93	1571.65	3517.92	2221.39	1146.86	1912.57	1508.71	1133.33	929.388	1781.7	1567.6	1313.26	1134.01	1183.91	2076.38	1447.57	1530.13	1216.73	2378.55	2041.92	1501.96	14975	10417	7203.73	3941.23	12363.4	1268.44	7801.62	9280.73	11267.2	6240.19	1467.37	2215.9	1220.05	3651.56	1262.14	1009.9	2913.94	965.761
pos_2501	Hexanoyl-CoA	4931.85	3107.65	3146.48	3143.74	6071.98	4055.68	9477.8	3823.48	6247.12	4177.23	2603.59	3921.83	4573.83	4066.36	4169.98	4704.95	4767.92	3640.57	4109.16	3398.47	3451.45	3700.81	3306.33	3814.84	3843.4	3518.44	4254.19	4742.34	4462.55	3774.89	8741.68	8499.06	13298.4	9272.12	12002.7	9302.1	7890.27	8230.15	8056.05	7368.49	7455.15	5200.33	5791.89	7804.12	7577.04	7965.4	9576.43	8072.27
pos_2503	7-Deoxyloganetate	3345.7	2815.58	1755.6	2589.75	2344.99	2829.21	2450.14	1587.6	3523.19	1887.14	2494.67	1997.98	1501.3	1615.24	2020.85	1540.14	2022.94	1895.9	3640.79	3790.03	2224.24	2252.37	3300.29	2629.01	2796.86	2020.48	2503.49	2118.1	2067.47	1926.97	1238.68	1156.38	831.971	892.903	1098.17	1153.36	819.405	1008.46	1004.25	799.978	931.917	1015.53	935.288	795.163	924.975	1085.77	793.588	1203.4
pos_2506	Maltoheptaose	1546.03	1275.56	1493.2	1127.12	839.603	969.867	1064.92	1189.97	807.548	1019.94	903.515	1408.19	1244.57	1033.4	1290.51	1176.32	932.919	776.338	1249.75	1044.72	1197.13	1119.19	944.838	1109.13	1138.72	1138.31	1006.83	1272.65	1177.57	1016.77	3100.92	3139.87	2734.08	2367.74	2523.51	1505.31	4014.22	4443.01	4466.75	3045.59	1369.44	1902.19	1049.98	2802.28	1183.81	1063.81	2822.44	1367.33
pos_2511	Butanoyl-CoA	735.486	713.735	839.254	549.516	567.604	601.126	808.432	612.164	866.451	527.75	720.743	1072.35	750.993	589.54	683.299	663.315	532.763	453.84	795.28	621.932	585.311	502.057	469.899	690.472	588.625	658.18	508.494	946.592	805.676	728.765	3691.04	3241.13	2473.52	2162.53	3015.66	1024.6	2483.93	2831.75	3359.77	2402.03	1037.29	1946.02	1012.15	2281.44	1179.07	899.983	1951.36	1048.37
pos_2514	Aurantio-obtusin ��-D-glucoside	767.57	687.923	601.001	490.916	548.646	707.514	623.306	689.373	651.427	627.489	654.219	922.589	685.973	502.255	729.151	677.907	650.366	510.879	839.795	727.672	747.693	628.309	600.111	831.896	713.31	713.588	634.443	781.529	705.369	626.006	1818.11	1543.82	1641.48	1487.02	1689.26	1361	1275.11	1515.31	1523.91	1395.24	1030.44	1019.39	795.65	1484.34	1005.83	935.484	1554.62	809.515
pos_2515	3-Hydroxy-7,8-dimethoxy-6-isopropoxy-2-naphthoyl-CoA	1434.66	1366.62	1200.54	1180.26	1050.69	1243.18	841.61	1351.11	1061.58	1196.61	1115.27	1164.83	1185.79	1100.73	1092.17	1158.43	1113.97	1091.52	1096.9	970.892	1229.99	1171.12	958.45	1050.49	1225.22	1214.43	1073.47	1057.41	1215.19	1223.58	1180.4	1131.06	1334.18	1329.7	1231.38	940.347	1232.02	1239.61	1537.6	1331.64	1175.7	1235.46	1091.97	1186.72	1255.9	1231.03	1269.23	940.728
pos_2517	sabinol	170.667	78.4184	103.723	50.1626	75.6099	85.8338	79.328	208.634	112.503	114.424	227.319	353.523	191.376	76.8905	143.588	170.639	71.0208	77.7701	164.907	117.776	227.668	146.91	101.899	200.321	220.048	164.742	176.368	217.455	140.599	232.961	90.699	82.7976	234.74	163.279	165.84	95.8635	103.496	121.28	133.614	109.963	77.1863	40.9685	29.1864	115.167	38.3515	23.8649	140.242	29.7246
pos_2521	Pro Asn Asn	7090.31	7202.58	7745.49	7012.48	3853.36	4075.77	3990.48	3875.91	2353.26	4148.64	4479.48	4663.9	5019.22	3949.24	10619	4039.24	3438.69	3665.55	4481.23	5349.06	3587.91	4315.16	6070.39	4962.61	4104.35	3658.87	4018.95	4446.45	4533.9	3425.51	1183.79	1297.99	1740.84	3166.17	1498.74	4162.38	3234.67	2735.17	3008.14	3016.71	3955.05	3464.74	3532.19	2456.66	2626.43	3144.58	2786.81	3893.41
pos_2529	Propenoyl-CoA	868.017	600.547	835.452	506.151	582.916	576.851	689.49	611.346	617.924	567.057	554.338	1136.8	895.546	583.264	692.181	712.937	576.13	505.21	622.462	530.47	583.989	529.805	516.254	712.318	595.898	580.654	545.153	820.052	609.559	559.305	16328.8	11427.5	7009.79	2424.89	13485.8	1007.68	5805.74	9302.15	11098.1	6858.73	926.029	1166.89	721.459	2079.44	900.253	672.69	2034.12	729.749
pos_2531	Pelargonidin 3-O-beta-D-sambubioside	2587.16	1918.82	1967.92	2067.22	3883.55	2459.01	5022.51	2544.42	4011.67	2702.47	1767.96	2340.27	2831.47	2602.25	2566.18	3089.17	3190.32	2534.23	2691.33	1923.29	2368.99	2409.82	2131.89	2348.81	2505.66	2356.09	2909.05	2758.13	2758.47	2652.9	3494.06	4015.44	6575.61	5495.74	5617.6	5208.71	3978.57	3658.34	3259.66	3922.99	4708.92	3375.09	4128.88	4812.85	5583.24	5529.8	5951.61	5135.93
pos_2533	5-Allyloxysalvigenin	11408	13289.4	8811.89	11020.7	11620.8	13061	11811.5	13386	17190.2	14170.6	15909.4	12827.1	9811.05	9394.51	8573.7	9603.26	11299	10349.4	12028.8	13448.7	9108.32	8341.03	11214.3	10584.3	10686	10517	9329.29	8134.03	8956.89	9512.24	18650.1	15853	11133.7	7230.65	16314.1	5584.85	12478.6	14899.3	14673.8	11540.9	8782.37	10902.7	10385.4	9494.43	10165.2	9225.96	7637.72	6738.08
pos_2534	dTDP-4-hydroxyamino-4,6-dideoxy-alpha-D-glucose	15331.4	23553	17229.7	18768.3	16216.5	18047.5	16420.7	22939	24765.2	17892.1	24436.7	21947	18246.5	15256.1	14615.7	15411	16302.6	15415.5	22982.6	24606.1	17247.1	14803.9	19368.2	21725.5	21966.1	19412.8	17167.8	15179.6	14879.8	18591.8	51727.5	38246.7	33453.1	19294.3	46087.3	12009.1	41350.4	46974.4	51602.1	38274.2	20001.8	22468	25098.2	24460.4	25290.4	18762.4	20372.8	13314.3
pos_2537	Salvianin	3524.8	6104.45	4280.44	5322.98	4613.43	5601.28	4099.38	6990.63	8999.93	4935.82	7930.47	6768.82	4631.68	3845.89	3191.53	4240.66	4679.6	4295.82	7298.06	8528.91	4597.74	3780.85	6007.82	6922.32	6955.09	5941.89	5800.71	3875.94	3722.2	5311.81	4759.24	4163.35	3478.46	4225.29	4425.49	2173.55	4810.66	5112.65	5417.35	5192.99	5939.06	7028.34	8691.41	4889.23	9611.55	6284.49	4187.66	2975.11
pos_2542	Validoxylamine A 7'-phosphate	11654	17805	12547.6	15867.9	14740	17507.8	13314.8	13546.2	24161.3	21452.3	17371.8	14320.1	10332.5	9647.81	11611.9	11807.3	14861.6	13225.9	11937.3	13536.5	8609.57	9050.02	12047.3	10216	11073.8	12766.5	9713.01	9734.54	10181.9	10116.7	3748.55	4355.35	3574.64	4573.92	3718.51	4052.28	5385.48	5085.48	4848.74	4346.63	10761.7	14641	12952.2	6456.32	12436.9	11806.3	4724.71	8434.73
pos_2543	1-Methylpiperazine	599.463	599.935	593.732	678.219	729.749	424.839	681.605	485.447	563.007	538.379	564.431	542.011	667.389	534.093	491.623	644.448	622.616	574.113	716.867	467.18	828.461	654.7	590.46	584.098	566.579	580.024	503.642	618.324	656.209	713.177	325.836	335.102	511.999	503.55	329.321	512.198	542.089	533.298	549.621	469.344	499.278	452.768	422.809	492.122	492.228	475.013	472.603	465.358
pos_2545	Cyanidin 3-O-beta-D-sambubioside	1274.35	1114.4	970.779	905.003	956.117	1068.32	939.038	1247.55	1331.25	1192.42	1158.66	1188.24	1095.24	950.084	948.674	1119.26	1088.72	901.901	1183.53	1091.53	1083.19	915.759	892.323	1072.66	1136.27	1104.17	1013.22	1024.17	958.236	1088.55	3468.91	3185.12	2754.24	2058.14	2914.2	1784.05	1966.83	2203.32	2627.58	2495.56	1204.02	1990.76	1060.78	1993.5	1170.12	998.834	1802.16	826.357
pos_2553	Demethyldecarbamoylnovobiocin	6382.4	8787.93	7806.84	6714.6	4097.81	4645.05	4128.26	6828.48	2770.67	5599.51	4628.66	4810.71	8671.23	7298.15	6577.13	6775.86	6939.51	5234.89	6952.76	7308.1	6142.59	6414.52	5851.46	7364.5	6441.84	5393.98	7348.76	9362.67	8585	8680.81	8500.07	11458.5	5233	10519.9	8492.22	15277.7	12435.4	10894.4	8366.11	11953.4	16992.6	13075.3	8157.87	12068.9	10379	11877.1	14543.2	12619.2
pos_2557	Pelargonidin	27604.2	26182	22429	24609.2	33487.3	40793.6	41646.4	27282.6	49574.5	32218.9	37839.3	27040.9	30199.3	41893	30189	30201	37982.7	38046.3	23690.9	28794.1	17244.5	24959.8	31068.2	23004.2	28028.1	23519.7	30567.9	32002.4	28300	22382.8	7070.73	7404.3	7092.72	8913.49	8485.68	9672.26	7519.15	7083.81	7158.24	7935.26	9172.11	8956.5	9631.94	7753.92	9522.79	9734.08	9284.23	10295.8
pos_2560	Phloretin 3',5'-Di-C-glucoside	7625.45	5737.41	5616.87	5134.91	5266.88	5739.31	4703.19	5801.86	5327.28	6131.37	5333.14	5115.01	5345.53	5717.77	5721.09	5665.41	5898.02	5697.82	5550.35	5873.26	6334.73	6251.24	5324.1	5488.23	6593.37	6384.2	6113.49	5991.36	6392.72	6386.56	2595.37	3533.79	5519.97	4755.73	4274.18	6247.52	3999.57	3968.9	2950.82	3993.34	4535.05	4115.53	4014.6	4226.37	3778.51	4067.99	4501.55	4526.54
pos_2563	1,3-Dicaffeoylquinic acid	593.515	581.812	576.367	496.176	432.983	443.459	439.042	495.33	368.108	484.931	539.356	557.302	523.243	473.859	492.978	491.662	441.211	419.187	518.015	412.043	543.822	524.131	435.351	531.773	503.395	531.016	457.942	586.792	497.14	549.398	1285.85	1078.45	1070.84	740.135	1177.8	422.365	872.411	1158.81	1481.86	1219.05	464.265	596.683	432.445	673.823	536.609	369.044	611.631	364.411
pos_2567	4-Isopentylphenol	735.361	1305.78	1227.21	1190.79	590.406	711.501	539.524	792.726	520.249	713.999	860.533	812.705	975.04	827.08	909.351	793.283	738.665	784.094	755.702	764.663	795.994	731.877	819.894	856.084	954.949	780.401	814.406	699.221	768.692	749.385	129.904	111.089	134.66	170.184	106.451	232.555	151.575	156.311	139.864	156.167	294.252	263.708	342.151	150.729	303.07	272.981	164.217	308.042
pos_2568	(5R,6S)-5,6-Epoxy-7-megastigmen-9-one	6198.52	9765.57	9050.61	9323.97	4926.75	5941.37	4342.21	6495.37	4591.54	6040	7118.6	6313.96	6860.13	6019.72	6841.08	6189.96	6052.29	6429.59	6375.16	6332.02	6381.74	6055.22	6686.52	7026.37	7526.96	6496.44	6717.2	5766.97	6268.88	6522.55	1580.89	1387.56	1688.45	1792.89	1516.33	2268.79	1710.11	1939.29	1749.82	1894.75	2945.95	2835.35	3122.79	1753.37	3120.73	2927.51	1823.69	3061.21
pos_2570	Cys Asp Ser Ser	3019.3	2668.86	3007.4	2738.84	2451.96	2196.83	2931.25	2678.72	2547.43	2204.62	2337.03	2218.42	2840.1	3114.04	2841.26	2626.29	2433.55	2596.39	2456.39	2277.24	2552.48	3024.89	2555.59	2911.83	2829.13	2421.6	2750.57	3467.14	3339.16	3528.41	2626.23	3271.82	3827.97	3328.29	3735.67	3616.98	3245.49	2846.62	2890.85	3433.29	3711.31	2946.56	3177.84	3615.98	3329.4	3888.73	4904.89	4949.85
pos_2573	Kaempferol 3-(2''-p-coumaryl-rhamnoside)-7-rhamnoside	4751.56	4171.75	6334.01	5317.76	4342.16	3046.68	5821.87	4040.52	3821.24	3209.6	3459.94	3693.19	5105.69	5822.39	6327.46	5025.66	4115.23	4435.69	4098.68	3103.42	4545.11	6377.02	4696.31	5275.41	4815.49	4063.63	5325.26	7935.04	7181.02	7267.79	6714.83	8816.15	9588.2	7400.45	10487.9	8800.85	8506.34	6795.64	7393.3	9817.38	8627.21	6481.25	7076.55	9668.6	7558.76	9562.72	13563.8	12677.7
pos_2574	Troxerutin	1285.58	1321.15	1132.82	1129.74	1038.67	1099.76	878.65	1377.78	1013.16	1161.83	1326.88	1287.2	1242.51	1284.88	945.877	1090.68	1130	1207.09	1230.5	1122.09	1545.17	1322.97	1144.53	1229.1	1372.04	1337.65	1114.6	1039.01	1110.22	1314.52	1900.69	1495.57	1424.05	1157.28	1691.92	762.793	1419.23	1415.84	1766.72	1714.05	1160.42	1267.74	1277.84	1210.71	1342.69	1031.26	1200.37	941.538
pos_2580	(2-Methoxyethyl)benzene	1328.57	2066.75	1506.47	1820.41	951.501	1134.35	737.327	1465.86	639.592	1218.69	1460.44	1207.26	1255.32	1156.07	1268.06	1213.18	1160.44	1342.66	1574.63	1410.26	1473.81	1293.21	1407.32	1782.47	1573.57	1362.84	1342.93	1111.19	1433.57	1648.26	258.044	255.811	235.151	296.062	253.521	387.961	311.159	353.014	327.697	386.229	520.209	512.102	537.097	334.127	613.325	594.039	327.656	520.238
pos_2582	cis-trans-Nepetalactol	5566.31	8589.25	6808.31	7816.66	4141.52	4831.58	3204.42	5943.83	3271.72	5142.85	6247.55	5212.17	5463.16	4965.78	5465.43	5106.99	5040.72	5822.17	6431.29	5840.09	6165.96	5462.91	5922.4	7465.36	6623.48	5711.1	5735.65	5067.56	6083.2	7262.44	1201.51	1099.45	1136.43	1327.33	1119.45	1787.35	1418.63	1516.88	1389.39	1712.93	2337.8	2289.05	2658.89	1432.27	2921.76	2660.35	1446.89	2432.84
pos_2583	Oxaloglutarate	23.8321	34.5865	76.1207	45.6588	37.7144	47.4438	37.3753	38.9818	44.5546	35.8943	32.5463	46.1083	64.4411	29.9386	49.1438	48.5963	37.3324	34.2767	36.0743	42.1784	26.5088	36.1251	40.5837	60.43	38.5953	37.4891	47.437	63.6024	47.8728	49.8443	22.811	30.1054	25.4795	42.5417	41.3866	44.4223	25.9989	29.3247	33.1136	26.5877	81.2861	69.1114	62.617	38.6099	60.4398	64.4368	42.2867	47.4058
pos_2584	Quercetagetin	8859.59	18209.2	30943.5	18674.9	13681	16154.3	11680.2	15324.1	14377.4	15460.5	14217.3	17640.4	23090.5	14147	21957.1	19396.4	15522.3	14920.2	16367.3	15558.2	13557.4	14376.8	15683.3	17633.6	16127	15308.6	15873.9	24062	18188	18966.2	8508.59	9120.61	10209	14867.9	12269.9	15402.1	10844.7	9897.86	10889.6	10456.7	24398.3	21433.2	19963	12810.1	21729.7	22392.9	14719.7	22823.2
pos_2585	Quercetagetin 4'-methyl ether	78659.9	170036	253229	172935	133244	153908	118305	145062	138248	144985	133798	163834	207195	137130	196227	178104	149346	141106	153519	147324	126615	134375	147202	163824	152964	142885	149432	220347	173314	178440	76677.7	84259.4	87472.5	139323	113092	150164	96176.5	84381.6	90335.8	91138.9	227425	207738	185789	121090	201273	207614	140642	220488
pos_2586	Curcumin	8.77353e-08	150.708	69.6813	81.3661	117.006	90.0282	89.8892	180.106	96.8932	86.5402	132.74	98.4425	201.636	143.353	94.4096	68.8716	101.793	81.3319	94.1221	138.036	81.8008	129.937	119.663	135.46	112.897	106.543	101.975	102.56	137.926	149.803	8.77353e-08	85.8356	8.77353e-08	99.634	60.0045	83.5029	58.1757	85.1357	143.261	75.7789	98.7646	93.7897	159.272	102.047	119.407	133.794	134.593	103.892
pos_2591	Asn Ser Trp Pro	3639.03	4300.62	3696.12	4103.16	2955.17	3031.1	2739.29	3284.36	3040.17	3106.75	3598.73	3246.95	3105.67	3207.56	3023.4	3090.93	2927.25	3227.68	3662.62	3320.39	3675.15	3249.8	3366.18	3727.88	3756.03	3229.16	3363.69	2849.31	3355.99	3749.5	1656.26	1506.73	1711.77	1735	1484.83	1868.46	1906.57	1901.83	1951.53	1982.42	2196.42	1945.14	2170.45	1746.81	2365.55	2254.61	1770.06	2118.52
pos_2598	Lamivudine	1752.53	2191.44	2323.27	2242.4	2039.8	1966.34	2048.98	1996.91	2086.26	1882.13	1858.89	1841.2	2200.14	2173.5	2066.64	2156.14	1952.84	2215.17	1867.91	1751.26	2006.1	2046.94	1870.2	2040.75	2070.84	2069.99	2019.11	2285.97	2025.76	2467.69	1817.03	1893.54	1818.98	2026.41	2050.48	2088.12	1745.34	1613.98	1576.95	1932.76	2274.71	2335.6	2252.01	1984.79	2339.42	2193.31	2121.97	2544.17
pos_2599	Anthragallol	2100.27	2317.12	2604.74	2373.94	2190.51	2157.59	2091.99	2218.86	2155.77	2046.78	2028.88	2135.12	2574.48	2371.83	2337.32	2509.68	2214.25	2433.72	2064.16	1893.79	2265.47	2248.97	2012.61	2305.3	2366.24	2371.44	2306.58	2618.73	2339.85	2690.08	2089.4	2200.72	2207.27	2424.73	2424.65	2382.77	2000.84	1945.8	1800.1	2134.05	2569.34	2619.5	2391.88	2275.2	2554.08	2321.57	2390.69	2724.47
pos_2606	D-Glyceraldehyde	128.095	164.996	159.465	159.71	175.102	147.955	199.056	155.791	163.005	143.116	144.181	126.967	160.353	171.561	147.05	149.767	143.545	146.61	155.981	155.396	138.158	144.681	143.347	141.021	156.488	145.743	147.131	155.329	143.697	172.51	130.887	124.913	114.033	130.409	122.97	150.226	122.079	102.133	115.716	126.428	172.439	172.182	175.492	132.366	155.893	164.027	140.679	169.263
pos_2608	Herbacetin 7-beta-L-arabinopyranoside	70785.4	66292.3	62340.2	70935.9	75534.9	72998.6	77850.4	65273.5	81466.6	67922.3	61130.6	59671.6	60795.2	69225.5	67712.6	69581.4	66733	75259.4	55370.6	56193.2	71976	73335.9	62388.9	60598.6	64826.4	71444.1	70433.9	65076.4	64597.9	73436.9	59666.7	68893.6	63065.7	70467.6	63037.9	74134.3	57708.1	59244.1	58078.6	68771.5	70657.1	73469.7	65073.2	71212.4	68793.8	68782.6	71565.7	78429.1
pos_2610	Horridin (flavone)	3134.7	3400.33	2257.82	2928.69	1713.44	1888.58	1474.97	2696.59	1766.38	1753.37	2787.75	3193.72	2381.7	1783.86	2345.3	2288.87	2080.74	1933.02	3301.48	3239.23	4655.16	3460.79	2855.28	4079.57	4160.05	3056.42	3541.8	2357.27	3780.3	3407.04	1300.13	1246.96	1566.64	2004.69	1530.35	1743.92	1665.3	2203.56	1701.56	1633.65	1291.59	1298.03	1480.65	2420.86	1390.38	1362.32	2065.49	1676.54
pos_2618	Pelargonidin 3-O-3'',6''-O-dimalonylglucoside	8964.05	16691.4	8946.21	12461.2	12316.2	15539.7	12007.6	15768.9	14705.7	20050.9	12696.8	11487.3	9351.38	7204.06	11414.2	8186.72	12863.5	8570.5	13377.2	15308.2	6542.57	6886.58	12391.9	9693.64	11965.9	10859.8	8468.8	8405.71	11104.3	10045	1994.52	2110.1	1641.81	2661.52	1525.85	2263.76	3773.54	2983.44	2900.33	3151.57	10124.6	12332.8	14149.3	5110.31	13712.8	13566.7	3956.77	7311.97
pos_2620	3-Oxopalmitoyl-CoA	270.27	291.633	236.977	221.535	193.643	198.87	181.4	261.422	168.083	241.318	222.884	213.378	204.191	226.44	198.291	215.266	175.36	203.633	235.718	207.161	234.589	233.742	230.454	200.557	241.899	227.809	205.536	206.126	197.28	214.223	1037.88	749.087	552.389	288.241	646.304	150.313	500.767	774.517	949.588	588.138	181.332	236.758	191.304	276.591	199.47	186.037	263.576	152.399
pos_2626	6''-O-Malonyldaidzin	1324.97	785.721	1524.92	620.492	616.915	822.677	673.885	1085.93	891.442	779.15	619.486	1904.15	1984.25	908.26	1739.5	1660.02	957.078	698.644	1070.28	692.8	899.87	813.782	595.238	1469.06	898.475	968.22	965.777	1924.66	1221.45	895.457	2918.72	2877.1	2810.43	2981.59	3332.11	1696.77	2581.18	3431.69	3436.42	2118.25	1812.19	2072.97	762.872	2160.98	1084.51	958.636	2263.73	932.849
pos_2627	dTDP-3-N,N-dimethylamino-2,3,6-trideoxy-4-keto-D-glucose	575.497	461.843	358.291	369.327	533.299	597.273	750.656	458.698	507.28	545.109	475.099	483.175	457.319	488.762	469.312	490.297	573.66	470.999	550.378	488.42	441.42	497.885	512.961	443.27	458.741	455.055	495.091	479.104	440.314	425.199	347.602	404.696	691.599	617.234	500.595	614.566	391.664	417.475	463.562	415.966	690.739	555.158	588.844	414.384	654.824	776.673	592.329	914.474
pos_2632	Epicatechin-(2beta->7,4beta->6)-catechin	22047	12740.8	22539.8	8770.18	13108.4	16451.2	15687.5	21603.7	14276	14692.7	11017.5	25931.9	34534.7	21098.9	24246.1	26391.7	22858.6	14908.3	18447.1	14001.3	16931.3	16843.3	10486.1	24227.5	17973.7	17880.2	21342.5	31675.8	23636.4	18964.8	24287.2	27711.4	32163.1	38299.9	40935	25790.5	25623.8	31928.7	26729.4	19174.6	29429.8	28085.2	11959	25096.9	17438.5	14664.6	26915.8	13766.1
pos_2634	3-O-beta-D-Galactopyranosylproanthocyanidin A5'	124536	75287.6	149276	47147.8	64649.7	88887.6	76984.8	129431	77276.5	80544	55346.9	169560	215608	122286	158075	168682	132604	80977	105265	75672.6	94663.7	91621.1	50973	153033	100955	105377	126624	210884	149928	113930	152828	182669	203023	251849	264175	162197	160264	210673	179360	118466	193079	188495	66502.6	164197	105682	84873.7	175454	78639.7
pos_2638	Pelargonidin 3-[6-(3-glucosylcaffeyl) glucoside]	1501.07	1038.08	1525.56	822.314	889.86	1141.98	942.173	1350.66	1041.34	1069.67	850.173	1740.22	1850.39	1248.76	1780.18	1816.19	1424.88	1033.31	1236.14	998.391	1222.53	1179.37	785.202	1652.58	1172.29	1281.79	1422.96	1989.34	1561.43	1301.07	1448.31	1855.54	2002.41	2342.44	2257.08	1671.49	1561.25	2076.31	1810.22	1318.09	1812.05	1799.71	774.457	1672.09	1136.39	974.342	1674.57	904.982
pos_2640	Sophoricoside	2025.92	1347.44	1609.99	1196.98	1682.63	1473.23	2541.32	1523.67	2031.28	1464.65	1071.41	2024.52	2152.48	1439.97	2119.67	1927.38	1588.56	1311.62	1594.55	1272.41	1346.74	1353.63	1180.58	1673.47	1402.77	1432.41	1565.9	2048.29	1638.34	1337.99	3370.74	3238.68	3160.98	3034.57	3474.54	2139.77	2810.98	3589.74	3699.26	2389.02	2186.38	2281	1339.89	2320.03	1657.4	1662.06	2575.62	1615.85
pos_2642	1-(5'-Phosphoribosyl)-5-formamido-4-imidazolecarboxamide	1190.27	4202.25	2457.53	3461.4	2680.98	3181.72	2398.69	2708.32	2289.31	2927.03	2334.01	2439.44	2022.58	1969.08	3680.36	1908.93	2619.67	2014.91	3652.63	3809.04	1765.3	1854.07	3119.49	2657.99	2539.63	2505.35	2740.84	2288.12	2767.23	2571.81	188.895	200.646	197.742	219.88	160.076	274.959	250.774	257.295	267.636	226.486	609.917	650.769	964.231	256.162	780.722	965.012	238.466	832.201
pos_2643	CALCEIN	1542.61	4139.61	2526.66	3579.76	2813.45	3315.65	2453.7	2846.89	2428.73	3116.73	2406.59	2470.57	2014.98	2175.42	3918.32	2155.23	2806.08	2185.03	3658.91	3788.11	2091.62	2218.98	3264.77	2777.62	2704.52	2768.4	2913.74	2385.43	2884.14	2706.71	388.262	459.599	557.133	505.2	395.098	631.46	572.243	545.447	551.233	482.962	1019.35	1036.79	1231.4	575.77	1060.77	1297.06	567.997	1192.99
pos_2645	8-Demethylnovobiocic acid	764.539	2166.43	1289.7	1968.47	1408.92	1687.96	1202.87	1366.62	1237.4	1642.04	1290.54	1238.33	914.065	1013.43	2007.27	1092.13	1366.52	1127.15	1815.74	1855.84	1074.36	1137.9	1667.01	1438.72	1335.94	1428.72	1419.94	1113.1	1449.93	1341.11	186.609	218.961	233.438	186.868	158.397	216.979	203.686	197.397	261.269	254.318	393.994	414.507	580.955	204.162	515.348	615.226	204.115	515.502
pos_2647	cyclo-Dopa-glucuronylglucoside	239.049	145.831	186.22	160.76	117.806	128.106	138.046	144.767	129.184	155.89	140.163	235.54	161.228	136.566	172.624	143.911	126.515	118.82	174.438	146.585	140.488	166.486	131.995	209.859	167.133	138	149.644	178.151	166.761	160.927	321.926	338.001	342.341	350.14	353.261	333.546	343.645	362.012	375.957	379.102	261.253	231.154	188.092	321.18	199.669	220.825	353.399	175.615
pos_2648	Tropolone	15447	10254.2	17775.1	9935.88	7420.18	8498.95	8759.12	9984.96	11423.7	8878.47	8761.14	19778	15686.4	9069.28	14993.6	12446.9	8976.81	8502.09	11897	9128.65	10600.6	10237.8	8574.57	15497.5	9408.85	10453	10278.6	18964.9	13641.6	12784.7	32340.9	30818.1	31052.9	28427.4	34655.8	27954.5	31560.5	33859.1	32875.9	31700.9	22733.5	20059.1	17145.5	30050.4	18003.4	17934.1	30074.5	20203.7
pos_2653	(3R)-6-Hydroxy-3-isopropenyl-heptanoate	181.926	323.467	313.062	366.931	182.927	223.267	123.352	212.924	170.978	211.966	317.203	214.07	203.088	214.142	208.656	189.503	225.977	245.325	212.785	209.529	235.794	210.94	223.821	246.2	285.275	216.408	264.85	174.385	226.415	257.966	38.7682	35.646	44.9571	54.808	22.3648	63.045	38.6107	52.7632	43.6502	61.0493	87.9195	83.4953	107.021	50.4038	90.6804	88.7329	39.1055	88.5923
pos_2658	Bilobalide	15863.6	8353.99	13173.8	8367.24	5875.33	7688.08	7232.4	8563.32	10677.7	8045.21	7358.44	17600.6	11540.2	7071.66	13278.8	10594.9	7152.56	7067.7	9730.76	7550.38	9435.93	9003.26	7202.92	13261.4	7558.43	9065.45	8791.13	14242.8	11562.1	10426.5	24123.1	25980.7	23821.2	23184.1	25457.3	23695	23592.7	27433.8	28341.6	26810	18949.3	17513	13652.4	24435.1	15083.9	15897.6	24284.7	17370.7
pos_2659	Dihydrourocanate	128.316	115.986	193.711	139.364	82.4999	20.0995	59.1416	141.999	74.5584	77.4304	88.6507	108.349	261.962	202.441	121.074	128.365	65.0675	166.33	176.224	61.1916	147.846	194.465	80.8467	88.8997	248.314	166.889	163.987	205.533	76.469	228.605	211.848	142.063	99.3337	69.9978	118.031	67.0725	76.2409	70.4729	8.77353e-08	156.247	118.46	78.2124	214.524	195.808	170.374	119.742	111.082	196.751
pos_2660	Bay-K-8644	836.936	574.996	795.651	532.978	395.418	436.399	488.275	489.978	552.672	451.761	440.234	947.079	702.071	452.874	662.616	542.976	381.928	400.098	635.172	514.963	523.995	491.715	451.553	786.488	482.256	486.888	494.255	820.327	596.061	577.14	1596.7	1372.13	1477.96	1321.73	1653.88	1302.84	1592.78	1561.71	1612.15	1526.52	977.909	802.39	768.302	1329.77	781.577	789.188	1406.06	820.122
pos_2661	Deoxynogalonate	1467.47	1080.99	1101.95	987.006	978.71	955.559	1091.58	980.112	1083.93	991.056	928.603	1120.46	1050.41	987.167	1011.57	969.299	896.028	953.14	993.15	982.932	1056.53	1028.12	1026.34	1134.68	1009.4	1025.13	948.14	1077.01	933.664	1052.55	1564.25	1489.08	1680.35	1452.67	1644.91	1660.22	1639.59	1694.4	1745.79	1703.05	1125.27	1041.44	1039.25	1479.12	1083.56	1047.51	1556.97	1056.05
pos_2662	Epicatechin 3-glucoside	6466.07	3547.94	5769.06	3322.64	2263.29	2771.41	2737.58	3400.83	3882.51	3042.01	2863.03	7347.37	4940.09	2877.7	5148.1	4099.02	2658.3	2680.85	4046.01	3046.94	3817.55	3543.54	2775.97	5663.25	3209.74	3595.84	3302.35	6035.93	4660.05	4333.15	11311.7	11301.3	10929.5	10443.1	12064.7	10588.6	11175.5	12008.2	12133.7	12167.5	8025.84	7122.32	5875.39	10759.9	6287.4	6441.58	10941.8	7201.28
pos_2663	5-(2'-Carboxyethyl)-4,6-dihydroxypicolinate	546.954	476.092	409.356	445.207	343.385	339.363	392.619	410.644	484.145	395.821	404.02	401.446	410.608	414.538	385.222	367.396	312.366	365.576	469.636	435.966	446.033	435.273	367.015	449.753	451.282	395.413	419.327	398.663	358.447	409.594	410.178	396.213	390.272	369.74	330.14	425.425	377.618	377.636	434.495	424.178	404.963	384.127	404.229	399.559	373.923	381.278	418.68	419.001
pos_2665	Catechin 5,4'-di-O-beta-D-glucopyranoside	1813.53	902.462	1673.36	838.18	474.717	591.742	568.291	837.701	987.637	687.901	670.691	2279.45	1384.47	663.664	1502.54	1092.78	567.408	580.651	1069.59	747.965	966.835	890.467	638.179	1600.97	739.437	870.625	820.107	1792.09	1222.23	1131.8	3405.93	3661.33	3465.77	3356.54	3836.88	3541.28	3628.78	3847.57	3742.53	3959.92	2527.71	2126.52	1736.59	3612.71	1925.49	1913.82	3580.3	2088.04
pos_2667	(S)-3-Hydroxy-3-methylglutaryl-CoA	2537.4	3935.16	1952.81	3094.42	3067.34	3766.15	2161.93	3951.95	3152.85	5518.94	2610.94	2069.9	1965.5	1942.37	2421.14	2198.63	3062.5	2272.07	2597.79	2936.37	1837.67	1929.8	2648.95	2046.24	3053.13	2785.25	2314.77	2015.26	2813.74	2514.77	1984.17	1936.03	1168.04	1111.54	1374.02	904.009	1671.06	2001.18	2520.62	1620.06	2250.99	2780.09	3507.14	1908.81	3604.52	3509.67	1715.21	1897.41
pos_2668	3,5-Dihydroxyphenylacetyl-CoA	1550.41	789.121	958.921	754.734	495.845	628.578	732.165	869.307	1052.92	682.322	675.67	1425.37	1076.4	706.611	1163.02	931.653	592.552	567.26	978.364	718.598	905.552	843.612	588.571	1142.35	777.649	820.258	748.549	1169.2	978.592	930.234	1798.67	1820.56	1606.95	1543.61	1303.31	1799.06	1529.03	1717.55	2023.92	1696.42	1592.61	1530.46	1453.65	1687.25	1259.26	1365.22	1593.73	1409.02
pos_2671	Adipate semialdehyde	7247.98	5396.99	8200.08	4707.54	3467.12	4124.8	3206.68	5056.71	4907.8	4150.46	3750.27	8585.91	7334.05	4337.9	7933.74	6274.81	4589.86	3734.41	6408.83	5094.4	5728	5094.19	4265.82	7483.62	4849.66	5355.23	5208.53	8561.86	7091.76	6436.74	12144.6	12145	13758.2	11808.9	14552.3	12194.3	13533.5	13901.2	12774.4	13085.9	10352.8	8939.78	7213.71	12852.9	7986.44	8371.86	12972.2	9209.27
pos_2674	Calycosin	5258.59	7709.49	5135.27	5302.96	6360.07	7342.41	4123.01	5505.94	3166.07	5474.59	7315.04	8616.35	9122.75	7979.48	5803.13	7104.59	6976.1	8661.85	5475.75	2828.97	5513.99	5139.47	4229.38	4987.21	8436.71	8682.46	6023.54	4661.68	7591.84	6537.03	2943.32	3315.57	4856.85	3998.75	3004.4	4800.89	3490.56	3381.01	3541.77	3348.79	4131.19	3862.76	7200.41	4010.09	4711.76	4841.04	4105.79	3925.77
pos_2676	Premithramycinone	1494.2	1147.2	533.027	1068.74	1552.3	1772.1	1492.61	1140.85	2149.74	999.548	1881.85	1137.98	895.263	1433.78	654.077	858.476	1036.88	1176.21	1733.82	1841.68	2156.32	1808.71	1751.46	1567.09	2294.48	1641.42	2777.62	1376.49	1350.56	1837.86	7061.01	6592.51	2163.82	3154.76	5265.87	4030.16	7432.03	6456.11	5402.3	7594.85	4029.1	4853.98	5309.32	6729.3	5788.59	5340.69	7533.61	6754.2
pos_2681	Narcissin	2199.81	2390.9	1965.52	2006.06	1395.95	1559.16	1181.93	1932.34	1568.8	1575.09	2008.88	1615.59	1695.96	1346.74	1520.24	2067.36	1717.82	1853.65	2354.57	2112.01	2803.12	2162.55	1931.21	2472.94	2347.7	2035.35	2099.62	1910.24	1832.11	2028.63	866.37	857.02	2238.74	928.413	1692.52	992.806	1258.67	2478.21	1194.87	1547.92	823.106	922.1	1361.38	1580.58	1116.06	1152.02	1283.67	1183.11
pos_2684	Urolithin A	4313.87	4437.48	4428.85	4887.42	4889.87	4508.48	5434.46	4452.65	5014.1	4294.51	4169.2	3852.95	4441.41	4975.54	4046.81	4748.91	4299.4	5172.16	3842.98	3888.62	4694.23	4782.12	4036.29	4163.1	4701.8	4580.01	4462.96	4323.9	4243.84	5188.88	4270.76	4339.3	3953.76	4126.02	4145.31	4253.07	3794.91	3606.31	3574.18	4201.57	4232.03	4481.53	4403.37	4196.79	4450.39	4080.33	4301.42	4668.97
pos_2685	5-Phosphoribosylamine	2789.17	2879.63	2880.5	2761.67	2568.68	2587.11	2610.68	2590.4	2599.64	2493	2277.8	2294.32	2697.69	2710.04	2817.02	2618.19	2431.77	2623.42	2516.57	2423.09	2662.21	2693.33	2506.74	2615.63	2672.3	2516.77	2564.25	2691.18	2695.21	2871.86	2309.57	2346.18	2544.02	2396.75	2521.31	2445.68	2333.74	2333.63	2249.35	2433.26	2461.42	2460.82	2344.9	2440.22	2398.34	2385.22	2557.89	2544.94
pos_2686	5-epi-Valiolol 7-phosphate	5119.99	5293.31	5224.08	5498.88	5514.07	5163.21	5748.4	5250.17	5230.91	4883.43	4810.37	4518.51	5393.46	5804.39	4857.19	5427.77	4970.36	5804.47	4617.72	4508.6	5521.06	5585.25	4740.97	4960.98	5499.6	5361.48	5292.31	5077.57	4990.74	5988.67	4492.72	4788.26	4575.12	4659.72	4631.55	4904.1	4301.01	4024.29	3943.93	4781.56	4829.56	5033.33	4886.55	4686.49	5029.85	4629.32	4842.62	5321.35
pos_2692	D-Galactofuranose	2550.75	2390	2463.88	2287.71	2241.49	2173.1	3403.88	2259.04	3019.82	2238.15	2073.21	2423.49	2608.31	2390.51	2179.39	2280.39	2024.42	2291.65	2070.83	2278.31	2282.32	2192.93	2226.17	2362.8	2315.97	2286.86	2161.41	2544.57	2357.6	2648.88	3154.57	2893.72	3246.44	3230.26	3176.47	3404.48	3359.15	2949.45	3322.5	3118.62	2767.56	2643.63	2532.87	2927.61	2520.42	2491.62	3279.91	2697.4
pos_2702	Quercetin 3-O-glucoside	1123.54	1579.44	1409	1281.81	1618.63	1798.66	1730.8	1627.74	1216.87	1516.21	1332.31	1520.17	1830.06	1571.02	1633.22	1582.72	1424.84	1422.53	1448.07	1329.58	1087.5	1165.56	1407.78	1380.55	1483.49	1279.6	1380.63	1587.85	1497.21	1450.99	1313.93	1382.24	1561.77	2108.72	1446.46	1773.65	1364.53	1291.87	1574.54	1416.02	1962.77	2135.22	1686.32	1485.97	1914.5	2059.22	1690.83	1973.32
pos_2705	UDP-2-acetamido-2-deoxy-alpha-D-galacturonamide	660.329	422.941	132.691	514.102	972.207	731.934	1782.6	510.755	1072.66	574.047	568.626	246.708	268.312	570.842	273.62	379.447	490.077	712.346	310.036	383.325	427.821	526.685	502.932	284.466	469.733	463.078	457.713	193.571	289.612	409.944	539.053	570.485	223.293	345.593	141.95	369.21	229.592	236.459	331.363	349.71	266.426	415.077	439.563	336.693	313.748	342.017	266.465	334.93
pos_2707	1-(5-Phospho-D-ribosyl)-ATP	28.7036	95.8891	110.661	112.414	189.673	182.006	306.735	124.585	166.677	173.338	105.202	117.562	125.183	80.046	129.294	93.3994	95.249	83.3293	101.048	119.466	27.8348	56.2537	115.357	84.1519	98.3233	82.8528	70.9435	103.296	98.9837	66.1606	61.2156	57.9252	44.9319	84.2402	25.1128	98.9534	28.267	46.6944	50.874	24.5571	147.62	133.043	120.798	47.4808	82.9211	131.111	48.0663	111.313
pos_2709	Granaticin	2076.85	2469.47	1678.74	2504.4	2067.22	2560.59	2248.08	2458.03	4016.9	2011.85	3173.67	2271.66	1920.34	2683.72	1435.14	1930.52	2382.74	2698.48	3424.99	2867.38	3251.83	2776.5	2242.65	3004.98	3044.27	2827.92	3925.49	2330.27	2387.98	3315.89	4142.83	5824.17	2152.4	5915.56	3054.6	7327.66	5404.92	3867.5	4286.16	5988.61	10160.1	11563.7	13609	5512.97	14203.9	12738.6	6660.21	13173.3
pos_2713	Diosmetin-7-O-��-D-glucopyranoside	4833.16	3973.67	1459.87	1597.65	4535.73	2533.27	3104.77	2636.4	4821.37	3129.39	3215.57	2985.5	3313.21	3331.96	2475.54	3846.35	2289.99	3164.93	1821.67	1424.61	2546.4	2936.35	2291.69	3096.35	3298.76	2862.25	2365.12	2150.83	2971.07	2892.59	5678.08	5855.15	15041.4	6152.63	8440.8	8867.73	9282.15	8245.49	7175.95	9084.4	6704.06	4604.02	4766.18	7737.21	5478.41	4409.3	9243.33	3760.23
pos_2718	1,2-Dihydrophthalic acid	13229.2	13300	12840.8	12360	8549.52	9084.99	8068.26	11903.2	4882.75	10423.9	8646.89	9971.33	10153.8	9287.84	13689.1	9791.79	9993.7	8575.85	12630.7	11892	11783.4	11996.5	11989.2	11803.5	10952.3	10781.3	10745.1	11021	12056.6	10878.3	2718.68	3760.68	4485.4	5002.29	4417.37	6546.8	6472.01	5343.58	4329.52	5528.33	8697.65	7826.24	7075.87	6133.41	7634.66	8618.65	6447.77	8381.24
pos_2723	PDM 11	97122.1	86609.4	82165.3	78260.7	67309.8	70680.4	64649.4	77501.1	56143.7	79079	64507.9	73261.8	72056.8	69107	96049.2	77127	72700.8	65420.6	79657.2	76932.7	80788.9	79736.1	78484.5	78965.2	77402.2	78815.9	75139.9	75281.1	85501.6	76725.9	40348.1	47981	69422.8	55624.3	57081.4	70131.8	66577.9	63951.5	56611.3	60456.4	70111.3	61858.2	58114	64301.1	60732.2	66804.6	66629.3	68085.6
pos_2725	2-Aminomuconate semialdehyde	244.367	233.963	202.718	224.586	193.643	194.692	222.629	183.175	208.86	183.721	212.987	176.714	178.815	186.452	170.87	185.39	166.477	173.021	200.898	200.409	198.864	180.448	209.903	203.445	220.264	179.07	176.991	186.881	196.68	213.428	135.28	137.558	178.69	144.958	157.328	165.141	151.189	155.344	161.012	167.699	167.034	167.578	145.685	140.409	161.482	169.527	172.755	178.43
pos_2729	Arthromerin A	14971.8	13842.7	12461	12592.2	9272	9794.17	8866.85	12341.3	6161.02	11110.2	9077.36	10160	10181.4	9772.12	13819.9	9891.39	10082.5	8992.71	12838.5	12203.3	12423.8	12332.4	12297.2	12098.8	11272	11158.2	11001.7	10786.5	12231.5	11243.8	3732	4500.77	6229.07	5640.14	5216.64	7446.79	7067.01	6439.63	5131.71	6377.73	8437.19	7674.76	7128.85	6720.16	7516.32	8553.88	7068.07	8226.96
pos_273	dTDP-3-methyl-4-oxo-alpha-D-ribopyranose	16.3905	0.794659	0.422994	25.9406	8.61725	8.77353e-08	16.7327	8.77353e-08	3.66732	8.77353e-08	9.38153	3.52597	8.77353e-08	1.59401	15.5956	8.77353e-08	8.77353e-08	3.63681	1.14861	4.33955	22.8355	26.2408	4.41598	8.77353e-08	8.77353e-08	8.77353e-08	8.77353e-08	4.53744	8.77353e-08	1.82539	28.2616	11.2715	4.21337	311.455	21.4859	197.942	55.9574	91.3102	115.547	44.8657	56.0901	101.869	27.5229	66.2308	48.8057	55.4184	57.5114	52.1351
pos_2731	Silychristin	65.4911	174.628	80.3184	68.6532	53.9779	101.474	66.7473	114.508	46.2702	57.1334	52.2212	53.0689	109.196	122.646	33.8448	78.5777	96.0036	89.466	123.756	109.936	49.9542	31.1429	21.977	49.9617	80.2294	37.235	58.5187	70.7279	86.0921	44.696	797.685	903.364	452.513	231.681	702.433	129.006	531.318	829.406	655.826	553.838	85.9301	117.709	92.1423	465.554	121.422	103.849	317.744	95.4497
pos_2735	Ciprofloxacin	1835.5	1796.01	1804.59	1812.9	1265.42	1386.82	1162.33	1619.62	753.392	1567.83	1273.33	1407.03	1407.35	1333.99	2032.07	1464.63	1405.01	1263.71	1755.66	1628.03	1706.54	1727.16	1733.23	1677.48	1493.29	1545.45	1569.17	1408.47	1647.37	1535.6	296.11	365.059	439.447	605.897	367.565	878.419	660.063	495.178	418.105	572.65	1205.48	1046.78	1050.19	724.828	1074.85	1245.62	722.045	1196.26
pos_2736	cis-1,2-Dihydrobenzene-1,2-diol	404.869	423.002	391.339	385.66	255.064	276.63	243.085	372.779	155.148	306.537	280.843	309.155	330.135	298.485	407.206	293.383	315.186	281.745	400.714	376.145	364.589	362.002	374.963	383.124	356.058	338.248	345.613	355.709	384.862	363.28	119.797	128.899	169.598	168.778	167.055	208.752	224.906	190.416	149.944	193.903	279.527	248.824	221.936	204.757	241.223	262.201	210.087	264.227
pos_2739	Rhapontin	3562.61	3141.25	3094.14	3061.84	1977.77	2179.21	2069.34	2765.57	1037.97	2665.82	1885.88	2426.11	2212.54	2056.25	3701.85	2391.46	2366.32	1915.55	3142.28	2909.6	2914.18	2994.4	2980.55	2788.11	2418.08	2554.27	2574.63	2414.3	2863.69	2383.55	7382.23	4853.53	3270.83	1369.72	4861.39	1341.74	2907.16	4298.66	4892.39	3019.61	1805.28	1508.84	1432.29	1544.77	1576.09	1842.49	1438.7	1787.9
pos_2741	Herbacetin 8-acetate	1548.31	1398.44	1298.21	1547.42	1837.19	1678.35	2095.89	1485.96	1981.2	1465.27	1602.42	1427.53	1551.06	1839.73	1363.68	1629.82	1577.72	1928.96	1289.88	1320.57	1719.09	1708.92	1432.15	1408.5	1612.03	1609.28	1574.86	1456.22	1414.74	1781.03	2033.9	1997.54	1994.8	1838.48	1975.25	1930.76	1689.07	1601.7	1702.92	1947.41	1736.5	1864.51	1722.82	1824.7	1699.25	1598.82	1915.47	1893.31
pos_2745	Psoralidin	1780.18	2276.49	2636.8	2085.5	1856.54	2198.19	1831.71	2118.69	1789.4	1961.74	2205.24	2388.5	2673.52	1972.16	2282.45	2207.5	2073.34	2002.25	2260.28	2102.03	1965.8	2036.02	2230.77	2406.49	2154.35	2070.38	2182.75	2493.3	2283.62	2391.46	2041.71	1994.51	2146.69	2400.18	2286.88	2141.03	1997.63	2018.27	2130.25	1964.67	2869.85	2672.35	2457.24	2122.14	2731.22	2740.5	2335.98	2755.09
pos_2746	Isoquercitrin	23481.4	32276.3	44059.4	35372.8	33738.2	37837	34749.3	32818.5	35989	36362.6	31046.6	37680	38254.6	29525	43332	39651	34131.6	31829.6	32353.6	31850.9	29017.7	32036.9	34023.8	35585.2	32494.8	33912.8	34940.1	40989.7	36569.9	36388.2	23587.3	28052.7	27589.9	35159.4	30290.2	34224.1	24253.5	25980.3	27653.8	26204.3	44860	43093	37470.9	31738.1	41971.7	44543.1	33698.6	44143.9
pos_2748	Furfural	107.948	103.587	106.852	95.7731	97.7101	114.932	96.0726	108.177	99.7866	103.093	104.766	118.406	108.215	101.748	100.93	103.31	104.143	104.017	104.111	102.311	106.893	103.73	97.362	116.956	114.264	107.71	110.327	108.296	119.464	123.072	104.575	103.672	111.168	110.339	109.295	106.975	101.464	108.1	107.774	110.346	118.194	115.265	104.282	113.898	118.793	117.608	125.799	112.677
pos_2751	Sanguinarine	258.634	207.307	135.987	164.059	206.476	218.682	160.201	244.178	220.899	240.956	177.399	150.256	202.66	254.439	216.393	192.601	225.253	236.644	136.717	158.951	165.135	161.681	147.929	130.443	233.905	185.168	221.399	158.89	204.703	151.525	176.635	159.983	202.618	247.812	148.699	178.086	212.135	212.646	190.622	205.233	157.415	177.895	149.909	226.732	167.285	163.181	219.23	149.559
pos_2753	Xanthurenic acid	71.6927	58.4884	57.271	47.7538	58.8498	66.2459	65.8072	61.0367	57.5005	52.3774	47.0813	49.9192	61.6737	53.9251	77.8928	53.0411	63.8363	57.0265	54.6358	68.0412	56.7494	52.3989	55.426	45.5793	50.4061	59.2464	63.036	62.2913	57.093	55.0726	38.4408	39.607	46.9261	50.3772	44.6307	67.0287	54.618	51.8367	46.8794	41.4351	58.7913	65.0728	53.8488	59.6784	46.3301	58.9456	58.6931	61.3842
pos_2756	Myricetin	43236.5	72861.5	92904.5	76301	65468.6	76123.7	63157.2	69262.7	63772.4	68496.4	70938.1	75321	85499.5	67389	75866.5	74864.9	72628.9	68659.7	65256.2	66996.7	53967.4	60871.9	70887.3	68533	64826.5	64669.3	68247.7	79873.8	69858.5	69560.1	47946	50932.9	42177.2	58760.1	56013	60216.2	48079.9	48602.4	52829.5	47087.4	94128.4	89568.5	79218.7	53669.3	80487.2	87493.9	58556.1	87946.9
pos_2762	Norzotepine sulfoxide	68577.7	112376	136189	116316	104225	120490	100044	113210	103389	108828	108881	115740	131563	108236	117750	117257	117408	109956	104821	106110	87985.7	97563.4	109005	109887	103957	101600	109425	127293	115362	117166	64790.3	71320.6	59571.7	91294.7	76247.1	95114.9	73487.8	67651.7	77365.2	68334.5	151397	141322	127093	84384.7	134826	144212	94413.3	144208
pos_2767	N-Acetylmuramate	1139.6	1597.78	1689.01	1691.43	1594.08	1777.28	1586.77	1474.55	1579.3	1551.78	1477.92	1468.68	1513.28	1459.6	1622.66	1522.26	1575.75	1590.28	1378.3	1490.8	1230.38	1344.33	1517.82	1459.45	1336.73	1345.29	1526.74	1515.56	1551.76	1543.29	588.756	712.021	605.104	996.396	648.361	1284.76	749.25	660.367	771.623	774.361	1930.09	1734.45	1619.18	960.731	1601.38	1865.89	1036.92	1819.82
pos_2769	Acetoacetate	774.15	928.263	932.815	970.603	996.02	897.327	1115.15	887.372	922.846	873.919	882.237	803.842	901.568	974.886	862.522	888.722	950.605	951.7	813.589	836.667	815.985	855.425	874.868	840.956	881.966	854.524	894.859	932.915	891.953	983.573	674.066	691.935	555.284	677.676	654.633	771.921	658.13	633.777	665.786	667.75	975.382	974.576	890.379	699.178	877.671	941.603	735.264	983.999
pos_2773	Sulfasalazine	222.25	189.808	158.833	193.045	327.778	312.134	385.181	193.61	257.69	224.203	193.133	213.774	171.353	198.173	205.744	200.472	246.324	222.575	196.01	215.239	187.851	200.163	272.588	180.983	189.73	215.234	244.093	226.713	246.731	201.193	177.1	242.359	208.876	253.089	150.788	315.498	167.782	198.675	208.757	178.944	268.374	256.055	189	253.953	211.807	262.21	263.485	243.359
pos_2775	N-Hydroxy-L-isoleucine	402.69	205.394	77.4675	332.472	355.882	44.1304	456.679	23.1468	768.61	83.2908	27.5686	27.1133	41.4266	77.7471	157.386	44.2265	22.7591	39.7113	35.2509	75.9948	23.4484	34.3836	35.3103	28.2534	56.9027	55.0626	39.4113	33.6887	43.4596	27.8804	5.18847	7.73211	42.5969	23.1051	19.3512	50.8324	0.0105419	2.54412	7.24122	0.203353	26.9988	50.6232	42.8728	2.81781	13.5929	13.9977	6.2989	33.943
pos_2776	1-Cyclopropyl-4-methyl-1,3-cyclohexanediol	5681.36	3055.04	4149.9	2519.53	2611.07	3208.86	3123.22	5749.25	3053.68	3367.94	6237.86	8984.58	5694.03	3067.9	4403.64	5048.94	3065.94	2787.77	5356.62	3800.14	6218.44	5117.65	3667.73	5792.24	6142.15	4701.54	5612.72	6255.74	5025.55	7279.18	3227.11	2520.59	6109.78	4987.27	4211.18	4154.21	3707.21	4226.56	4167.08	3736.13	4195.18	2863.34	2246.62	3704.28	2917.39	2689.13	4543.52	2503.69
pos_2779	Rhizocticin D	34734.7	17365	25061.2	16012.5	18390	21827.8	22602.4	35933.7	21537.1	23054.3	37551.4	51972.5	34854.7	20025.2	30072	34088.5	20051	17819.9	30152	23453.2	40427.5	33965.1	23884.9	33297.3	36836.3	30490.6	37286	37223.4	29039.6	39933.3	18882.7	17000.4	38995.9	32410	25392	25481	22495.3	24865.9	25200.4	22733.5	21369.3	15127.9	12278.8	24549.9	16213.2	14862.7	28261.9	14461.9
pos_2787	Adipyl-CoA	4753.46	6329.32	3658.27	4961.66	4711.95	5821.3	5406.52	5931.26	6422.51	7605.15	6099.76	5160.29	3737.11	3186.59	4399.85	3786.51	5932.05	3779.83	4880.9	5099.41	3005.83	2866.39	4854.37	4267.83	3865.04	4494.33	3390.42	3293.61	4146.54	3973.19	1691.4	1758.29	1714.84	2306.76	1572.4	1795.1	2239.42	2009.16	2105.41	2123.58	4152.02	5369.42	4865.82	2439.72	4503.42	4569.95	2115.24	2593.92
pos_2790	Rhizocticin C	5190.72	3850.42	3746.99	3480.59	3066.85	3603.32	3515.8	5169.4	4224.73	3659.41	4123.64	4310.93	4871.67	4097.68	3221.42	3890.42	3324.85	3523.66	5491.06	4579.85	4674.81	3984.38	4154.84	4492.89	4848.53	3679.16	4381.07	4330.51	4073.48	4546.22	5723.33	5734.61	7078.19	5714.3	6191.1	4853.62	5625.67	6404.16	5919.15	5444.79	3942.3	3620.77	3802.24	6209.28	4482.51	4276.38	6487.27	4196.18
pos_2792	3-Ketosucrose	690.474	998.485	1091.56	898.157	678.604	715.803	629.992	875.078	780.872	776.989	774.451	706.135	938.105	848.24	736.645	811.016	832.207	843.512	796.092	740.38	759.338	718.529	787.027	868.796	786.58	763.737	713.231	830.597	782.421	908.392	476.134	465.125	480.322	470.562	493.644	497.584	614.947	515.791	495.046	539.893	750.475	642.246	764.136	547.975	1009.54	915.057	599.651	804.168
pos_2793	Diflunisal phenolic glucuronide	4570.22	4812.35	2523.66	3629.37	4285.06	4744.2	4149.83	4451.31	7038.06	5388.35	5047.39	3856.67	3408.58	3392.12	3196.95	3573.62	4343.95	3842.45	3385.21	3649.72	3428.05	3550.56	4079.15	3520.66	4001.28	3893.16	3458.99	3007.79	3344.39	3682.77	3334.97	2836.86	6931.16	3546.7	3730.04	2963.53	3809.53	3071.11	2824.33	4592.87	5076.67	4721.68	4978.25	4733.7	7855.3	7230.23	5776.98	5369.2
pos_2794	Avicularin	19350.2	23510.1	13775.2	20002.2	21658	26258.7	21319.5	23436.1	32373.4	32615.3	27825	22124.7	16245.3	14706	15838.9	17887.7	24907.2	19293.1	19054.5	20783.3	14224.6	14147.3	19573.4	15726.6	17989.1	20049.5	15152.9	13596	15749.2	16319.4	4734.58	5848.46	4795.52	6680.13	4213.46	5274.01	7227.9	6636.58	5584.33	5757.77	15252.6	19713.6	19255.8	9015.99	18326.8	17616.9	6389.32	10716.3
pos_2795	Luteoskyrin	50728.9	61786.9	32644	50639.1	57086.4	67926.4	57414.9	60720	86796.6	79857.9	70237.3	52238.6	43790.1	43412.2	35666.1	45309.6	66037.4	53692.7	45787.2	51857.3	35685.9	35448.6	47769.4	37212	47237.1	48822.3	37541.5	34053.5	38980.9	40361.9	14145.2	16278.3	15694.5	18544.8	12936.7	16390.1	20404.7	17917.5	15667.1	15315.4	39135.7	49686.4	50122.6	24320.3	44040.5	42980.6	17535.2	28720.8
pos_2797	Guanosine	29484.6	46600.7	26648.4	33136.8	35819.4	46916.9	39784.6	50717.9	47648.1	60017	46935.9	44547	33941.9	22596.9	33402.3	28775.2	44448.8	26950.2	42299.4	45846.9	19712.6	19708.7	38923.8	32854.5	36812	36134	25896.3	27261.4	33271.4	31688.4	7339.78	8094.98	6117.77	11039.3	5998.73	7315.49	13486.6	10386.5	9416.86	10406.8	35857.2	44074.1	44878.3	16360.9	42718.3	41457.1	12317.9	21746.6
pos_2798	Quercetin 3-(2G-xylosylrutinoside)	6180.5	6756.47	4156.72	5644.87	6263.01	7471.22	6530.91	6607.65	9272.73	8426.91	7724.89	6432.45	5056.85	4929.95	4356.76	5150.63	6902.59	5819.27	5327.32	5744.69	4433.16	4278.32	5339.35	4475.8	5420.32	5686.88	4550.3	4392.1	5033.26	4874.96	3089.61	3503.01	3009.59	3266.6	3024.14	2954.02	4421.62	4737.27	3636.01	3645.14	4800.61	6309.78	5683.49	4462.04	5304.12	5089.94	3534.48	3752.02
pos_2799	Kaempferol 3-sophorotrioside	13609.8	18711.8	11192.3	14987.1	16937.9	20834.9	17403.9	20259.9	24491.3	24813.2	20161.1	18238.7	14490.5	12152.5	13840.8	14023.5	19949.6	14626.1	17010.5	17837.9	10834.5	10515.2	15721.4	14148.2	15361.3	15952.2	13111	11510.4	13235.1	13939.4	5794.74	6079.73	5235.2	6420.76	5005.35	4806.4	7008.66	6456.59	5936.5	5707.37	13448.2	16775.6	17012.8	8019.61	15950.9	15484	6145.4	9067.42
pos_2800	10-Hydroxycamtothecin	2868.8	4397.05	2701.56	3183.68	3340.15	4402.49	3540.83	4776.34	4148.94	5601.51	4396.92	4371.19	3312.22	2211.45	3210	2834.64	4149.05	2645.14	3989.22	4088.46	2043.44	1994.8	3610.98	3270.3	3458.56	3610.37	2534.72	2624.58	3187.29	3140.05	1074.14	1060.19	905.666	1212.11	923.729	821.742	1444.4	1229.84	1147.56	1204.72	3318.22	4069.56	4050.34	1603.97	4012.18	3795.24	1280.85	2011.53
pos_2802	Malvidin 3-O-glucoside	630.845	681.332	770.823	539.902	473.776	580.224	489.115	594.823	639.471	517.696	558.993	749.815	641.302	517.099	692.269	594.182	531.101	465.229	623.598	519.49	553	500.921	502.408	595.715	565.479	624.977	587.267	800.186	712.985	686.401	1489.85	1473.95	1233.2	1221.57	1653.71	606.301	1117.03	1367.61	1277.27	980.108	646.823	902.054	685.942	1203.5	802.299	700.469	1128.74	708.068
pos_2806	1,3,7-Trimethyluric acid	1461.31	1370.79	1502.58	1326.94	1306.32	1318.36	1172.63	1329.66	1466.72	1283.64	1157.83	1122.82	1338.88	1318.35	1422.03	1338.46	1199.13	1335.2	1411.13	1378.27	1696.31	1495.87	1533.41	1491.65	1372.03	1240.97	1327.24	1468.03	1356.08	1444.68	1424.25	1392.74	2175.81	1748.32	1582.2	1873.89	1612.72	1718.63	1671.05	1637.46	1280.99	1228.57	1329.03	1682.47	1333.88	1349.88	1887.52	1410.7
pos_2807	Visnagin	1801.44	1451.02	1601.79	1568.19	1457.14	1556.41	1949.75	1321.59	1269.08	1501.14	1466.5	1204.05	1294.64	1749.24	1555.74	1356.6	1435.13	1447.64	1532.13	1702.27	1284.1	1763.17	1919.88	1494.65	1616.45	1203.95	1857.49	2122.82	2203.41	1617.54	1152.98	1236.8	1172.26	1122.12	1427.13	1739.3	1193.72	1157.56	1379.79	1268.74	1780.61	1672.77	1455.23	1099.12	1005.46	1513.48	1418.28	2182.04
pos_2809	Ala-Leu-OH	693.493	693.411	578.3	597.258	618.81	697.741	557.799	700.462	914.06	683.511	650.285	514.094	625.489	765.05	476.034	644.14	634.614	697.51	786.59	843.717	743.308	660.658	841.172	754.38	679.394	575.797	675.773	685.601	638.598	617.877	1035.32	961.782	1482.64	976.503	1159.8	1017	1063.44	1053.04	1019.84	920.189	639.086	623.595	795.27	1083.61	784.578	798.261	1321.35	834.891
pos_2810	Biochanin A-beta-D-glucoside	4369.04	4847.87	3440.5	4199.06	4272.97	4821.73	4529.15	4420.59	5653.56	5449.3	4860.01	3894.31	3533.05	3619.16	3370.75	3499.19	4462.76	4120.39	3994.68	4123.9	3461.15	3366.46	4065.23	3520.4	4000.26	3769.06	3406.1	3305.8	3700.76	3684.38	1881.98	1938.75	2143.8	2170.92	1777.11	2389.16	2324.36	2353.32	2426.14	2195.66	3251.54	3714.57	3863.84	2403.35	3298.4	3437.51	2167.41	2893.65
pos_2812	Melittoside	5518.01	5076.13	4989.16	5184.87	4287.79	4433.41	5104.98	4245.05	3741.45	4124.98	4713.11	3977.04	4219.44	5061.02	4576.12	3998.15	3938.71	4315.07	4869.32	5140.82	5114.43	5255.71	5463.75	4765.29	5020.06	3941.63	5072.15	5174.62	5526.57	4900.97	3612.72	3404.21	3643.63	5373.43	3667.26	6755.5	4381.44	4869.3	6204.01	4535.59	4541.72	4409.99	4290.21	3589.45	3583.26	4364.09	4055.77	5314.6
pos_2815	Toringin	1876.62	3104.86	5245.44	2784.57	996.947	1032.92	783.729	1735.99	602.162	1152.57	990.367	1586.13	1998.51	1410.21	2405.75	1660.28	1082.45	1178.55	1560.71	1200.09	2173.96	2181.67	1334.79	1957.24	1913.01	1996.46	1651.17	2599.23	2634.46	2528.89	1165.92	1238.24	1426.42	1192.66	1357.91	1228.22	1322.65	1332.1	1245.16	1346.33	1104.08	1041.59	958.117	1475.67	1141.06	1057.84	1415.79	1067.64
pos_2816	Cyclohexane-1-carboxyl-CoA	467.544	424.18	424.139	342.943	290.595	319.548	273.711	391.252	308.401	332.614	350.534	433.796	433.332	341.517	324.912	350.692	265.413	296.478	340.205	305.889	403.612	342.449	279.355	379.114	416.569	405.742	325.815	373.159	346.531	376.767	6654.4	4625.25	3240.37	1124.73	4519.55	513.576	2522.32	4328.97	5094.39	3264.16	391.583	675.854	340.213	1049.88	424.383	289.342	943.483	292.973
pos_2818	4,5-Dihydroxybenzo[a]pyrene	1656.77	1808.36	1623.96	1724.7	1432.19	1398.13	1389.25	1419.84	1227.67	1379.72	1198.45	1123.28	1372.86	1432.49	1285.56	1315.49	1232.7	1310.73	1448.35	1363.77	1262.41	1297.44	1380.29	1409.86	1464.46	1291.97	1338.45	1327.22	1300.49	1530.35	898.975	910.349	962.45	889.926	897.188	1042.28	920.175	871.943	900.365	947.61	1037.28	1084.23	1075.51	876.771	1151.46	1077.61	905.354	1141.34
pos_2821	6-methoxy Naphthalene Acetic Acid	4758.2	4770.04	4401.53	4402.38	3701.17	3380.44	3559.09	3135.05	3258.87	3325.01	2536.31	2675.37	2845.25	3096.63	4058.85	2902.69	2615.03	2807.32	3360.05	3342.72	3443.03	3523.65	3496.98	3220.67	3407.23	3124.71	3337.09	3333.48	3473.48	3318.28	2742.36	2557.47	2780.4	2774.68	2681.15	2701.16	2570.49	2713.1	2594.97	2645.72	2518.42	2558.36	2278.25	2513.8	2233.47	2287.51	2636.47	2443.45
pos_2822	Salidroside	2882.86	2929.14	2581.46	2551.65	2291.02	2334.74	1668.82	2007.6	2189.36	2203.56	1520.62	1583.06	1730.13	1764.41	3139.04	1772.42	1730.65	1867.75	2163.41	2068.91	2537.63	2313.88	2251.8	2200.32	1973.9	1923.61	1991.13	2091.2	2255.53	2027.39	2273.85	1851.57	2046.38	2679.79	1988.71	2220.95	2166.28	2876.78	3112.11	2396.42	2083.94	2147.93	1758.18	1931.71	1826.45	1775.39	1907.85	1792.51
pos_2823	(-)-Naringenin	22993.7	57834.6	48523.8	63193.4	54832.5	56597.2	80142.4	58796	73896.2	47772	81690.1	72387.5	49325.9	52594.3	69308.7	46625.3	57484.1	51432.4	78409.8	76693	45343.3	44840.7	71421.7	76294.4	46064.5	48036.2	57726.6	47035.2	39877.9	51673	15520.1	17289	13169.2	32179	15464.1	30540.8	22558.3	17831.8	20949.5	22815.9	48160.7	51691.7	57983	26015.3	56064.7	64784.8	27499.3	66354
pos_2829	Dihydroanhydropodorhizol	13282.2	11956.6	10465.5	10931.1	9312.64	10132.9	5699.94	7642.44	9127.15	10352	3738.73	4977.97	6227.7	6997.34	14293.6	7138.01	6329.54	7296.25	7770.01	7556.68	8041.14	9199.49	9184.19	7788.5	7307.22	7137.09	8266.71	8185.72	9517.01	7158.32	5028.25	5106.79	6216	7948.94	5203.86	7853.07	4215.29	4875.83	4715.63	4696.16	8382.99	7404.82	5418.61	4237.87	4797.23	5392.02	5171.3	6112.45
pos_2833	dTDP-L-epivancosamine	28462.8	20847.3	23794.4	18776.5	19043.1	22463	27822	21670	19855.2	20292	23611.7	28829.8	26180.6	23573	24705.8	22789.8	21596.6	19563	22329.8	20307.9	21257.8	22485.8	20152.6	22212.8	21628.4	20558.4	22963.8	28751.6	27114.8	22275	31238.9	36461.7	32909.3	33191.5	36956.2	30279.3	38917	42843.1	35140.1	32671.6	30170.8	31956	22542.8	35835	25256.7	26555.4	36348.5	29405.9
pos_2834	Narirutin	2920.9	3119.3	2350.59	2739.87	2483.1	2564.48	2201.35	2283.65	2369.1	2441.64	1433.98	1570.11	1891.82	2306.69	3275.29	1791.34	1796.39	2031.51	2281.84	2269.28	2126.61	2349.12	2359.09	2121.54	2109.57	1949.19	2068.61	1947.66	2210.74	1853.56	1558.22	1492.96	1931.09	2076.72	1583.2	1822.03	1608.87	1528.13	1574.13	1593.75	2086.6	1909.32	1644.54	1421.28	1505.02	1519.82	1563.6	1640.23
pos_2835	Tryptophyl-Cysteine	1130.74	1638.87	1562.21	1341.1	714.727	935.858	638.179	1668.23	905.518	1143.51	1183.93	1110.75	1086.69	702.318	624.101	888.873	952.663	768.2	894.556	669.925	772.079	640.527	821.423	935.026	890.205	843.034	631.54	946.352	1037.8	1042.33	7243.69	5007.72	6847.77	4984.79	5899.08	650.659	4432.63	5062.77	6499.32	8508.63	2413.57	2161.17	1555.8	4059.01	2651.26	1362.2	4106.1	916.85
pos_2837	Tenuifoliside A	1463.32	2180.33	1534.15	1832.91	1851.67	2160.79	1669.43	1775.11	2022.85	2104.18	2154.2	2171.14	1666.77	1571.99	1836.14	1799.3	1907.74	1816.09	1776.28	1521.09	1507.58	1290.85	1673.64	1516.89	1723.2	1872.87	1484.21	1467.24	1701.56	1540.23	1533.46	1764.15	1782.54	1987.51	1657.89	2174.76	2011.28	1848.79	2058.39	1885.44	1915.57	1744.66	2805.3	2509.4	2021.66	2308.82	2324.09	2199.97
pos_2838	Palatinose	4231.74	3272.21	4004.31	2727.15	2287.16	2696.31	3381.81	3254.69	3710.59	2638.29	2949.01	4206.11	3774.15	2765.1	3481.41	3123.56	2613.95	2285.79	3460.81	3351.17	3044.87	2847.34	2666.81	3637.02	2913.59	3043.57	2760.21	3813.2	3334.95	3608.73	6493.92	6666.59	5268.35	5442.78	7887.18	3795.97	5585.78	6257.27	5694.56	5093.24	3681.35	4217.7	3071.3	4870.06	3381.36	3083.57	4520.39	3022.86
pos_2841	ethotoin	2162.98	2383.78	2128.74	2154.03	1777.44	1907.15	1436.66	1714.88	1688.95	1815.18	1237.79	1393.16	1554.88	1525.6	2318.83	1561.9	1525.69	1681.29	1774.96	1667.72	1829.58	1825.23	1865.32	1777.98	1759.36	1686.01	1816.57	1905.87	2047.98	1903.93	1331.04	1253.54	1481.41	1435.69	1336.86	1390.1	1256.46	1487.56	1379.33	1310.91	1387.99	1343.71	1119.63	1223.41	1125.96	1205.47	1310.19	1304.16
pos_2844	PPA	3230.45	5253.91	4582.45	5059.39	3155.44	3381.97	3143.25	3863.52	2772.56	3223.02	3122.53	3147.04	3681.7	3232.83	3816.83	3197.39	3468.77	3558.05	4247.88	3814.1	3865.37	3661.21	3637.89	3823.46	4059.96	3878.46	4179.6	4281.36	4487.27	4353.71	663.504	624.318	664.635	701.407	610.756	1128.56	889.609	927.055	726.098	821.857	1126.81	1110.91	1594.79	902.534	1349.69	1535.22	952.846	1560.19
pos_2847	Ubiquinone-1	4270.49	5774.42	4945.31	5481.34	3925.22	4098.98	4054.78	4113.58	3628.01	3823.44	3574.55	3654.69	4028.6	3662.42	4444.3	3729.63	3951.48	4109.41	4568.41	4191.75	4304.57	4136.11	4172.33	4442.8	4463.71	4239.11	4631.96	4769.54	5012.02	4980.96	1702.21	1641.2	1761.6	1833	1777.7	2200.63	1898.66	2078.44	1868.83	1912.52	1982.43	1990.64	2230.78	1937	2164.06	2319.25	2048.37	2486.11
pos_2850	Methylnissolin-3-O-glucoside	1231.82	1424.36	1189.28	1278.52	1029.96	1110.88	1127.91	1245.17	1007.16	1013.55	978.26	973.793	1182.86	1199.62	1060.93	1034.14	1046.59	1120.18	1222.37	1187.69	1236.27	1126.42	1108.17	1179.85	1362.18	1124.82	1182.59	1212.7	1265.95	1302.97	711.599	701.509	826.354	906.167	667.176	875.993	805.561	792.373	713.214	775.834	955.479	895.273	1043.51	904.802	1161.27	1212.65	918.436	1236.45
pos_2853	Glycyrrhizic Acid	413.282	780.99	818.737	1007.1	293.587	331.54	217.477	383.27	195.982	372.44	404.192	324.428	369.964	297.609	529.246	422.364	367.231	464.11	511.25	460.471	628.09	532.367	515.145	516.55	531.636	581.089	619.591	581.16	625.506	648.08	14.4212	17.1636	38.8242	28.2391	22.5876	20.4277	28.0584	38.7757	27.2969	31.1795	8.6514	9.91848	52.4128	23.0704	24.9239	36.5936	15.981	49.3167
pos_2854	p-Tolualdehyde	263.986	265.582	244.153	242.972	241.779	235.879	246.039	244.835	258.461	235.586	226.457	200.29	230.679	254.895	216.671	221.516	236.826	249.876	247.187	240.642	248.439	245.344	246.781	230.527	247.774	230.793	246.393	251.203	230.818	235.022	196.939	186.86	265.431	198.922	190.683	255.978	218.004	209.1	216.977	214.864	219.656	230.659	243.779	210.166	199.583	229.575	238.093	257.58
pos_2855	Tabtoxinine-delta-lactam	82.2927	122.298	92.3989	77.2249	23.0445	30.1991	45.0964	44.8348	15.569	43.9126	6.52501	3.26055	12.6595	15.8755	27.5989	29.1539	41.431	18.9722	40.6426	31.9418	92.2847	55.2871	27.7632	12.2901	47.8331	50.8202	26.4732	47.1448	75.9204	39.6026	3.23139	1.43467	12.4851	1.95331	8.19841	4.65218	3.99504	12.6258	9.12074	1.43765	2.42772	4.45244	1.20375	7.84073	0.905444	2.03502	4.44472	11.6328
pos_2859	Bursehernin	5640.22	5078.03	4512.77	4319.68	4370.03	4679.61	3400.7	4351.23	4564.35	4428.18	3432.81	3754.75	3925.52	3817.43	5078.78	4043.33	3741.82	3991.24	4194.58	3890.46	4720.7	4711.17	4567.43	4279.33	4334.55	4194.98	4231	4176.31	4377.77	4253.32	4021.21	3885.28	5991.08	4726.97	3951.94	4174.64	5018.2	5879.98	5206.15	5293.69	4517.44	4421.07	4077.72	5436.97	3904.28	4371.15	5401.59	4361.22
pos_2861	4'''-Demalonylsalvianin	2848.96	2064.68	2726.47	1728.93	1819.7	2273.55	2729.79	2272.68	2854.2	2119.28	2381.22	4028.93	3351.81	2072.83	2418.46	3395.92	2276.46	1600.24	2369.03	2408.24	1909.97	1781.85	1715.81	2736.58	1983.25	2129.97	2079.06	3658.92	2621.6	1781.83	2471.28	2805.7	3765.1	3459.3	3491.48	1917.13	2979.53	3256.46	2982.59	2307.15	2078.93	3072.52	1658.42	2542.31	1671.38	1653.08	2423.97	1640.32
pos_2863	4-Hydroxy-4-methylglutamate	1284.24	1465.17	1375.16	1379.9	1105.82	1252.98	733.974	1551.37	970.272	1182.63	1409.44	1035.68	1505.46	1465.02	1132.26	1174.87	1523.25	1751.81	1309.22	1174.74	2360.22	2027.94	1294.09	1342.7	1568.33	1665.28	1358.41	1173.65	1338.64	1404.18	505.842	474.167	604.682	521.957	558.695	557.28	522.099	535.376	522.344	524.3	513.504	458.421	519.552	494.403	532.983	525.09	546.964	567.491
pos_2866	4-(4-Deoxy-alpha-D-gluc-4-enuronosyl)-D-galacturonate	715.678	1040.91	516.981	662.7	1042.01	912.372	503.484	588.153	312.49	701.001	1062.84	991.874	965.981	888.145	512.807	1082.95	683.672	1076.81	666.851	326.399	913.071	737.251	886.912	1051.85	986.53	777.556	716.501	397.754	808.489	912.288	309.318	411.444	498.638	449.847	322.199	579.848	368.374	348.378	293.43	550.204	374.107	335.714	545.029	486.732	553.368	450.979	492.769	315.112
pos_2867	8-Amino-8-demethylriboflavin 5'-phosphate	6015.18	8212.95	6635.27	6800.19	7148.92	8394.03	7823.18	8989.55	8271.52	9517.42	7411.95	8097.59	7129.93	5490.49	6589.66	6255.42	7884.19	5712.38	7789.47	7961.69	5402.26	5136.22	7121.51	7241.04	7109.44	6979.55	5814.92	6771.59	7335.77	6883.82	2516.78	2621.39	3107.54	3316.37	3135.47	2986.82	3493.62	3222.51	3128.84	3147.19	6431.99	7494.17	8045.1	4022.24	7807.66	7808.1	3537.6	4998.43
pos_2871	DIMBOA-glucoside	1079.4	1168.35	1777.67	880.773	686.207	796.132	809.606	1036.55	1478.48	907.688	948.18	1820.79	1096.6	574.018	1276.77	850.57	631.983	538.844	981.252	853.972	719.776	603.32	735.941	1135.58	786.201	841.314	603.935	1313.53	947.452	821.107	13765.6	9920	6734.54	3869.85	9726.3	1453.58	6169.65	8571.66	10396.9	7160.8	1409.21	3008.6	1234.9	3222.15	1353.94	1008.38	2832.22	1078.22
pos_2888	CMP-5-N-acetyl-7-N-(D-alanyl)-legionaminic acid	2789.9	3386.79	2358.7	3082.62	3310.2	3667.13	3075.3	3411.44	4904.74	4396.15	3619.99	2938.7	2453.14	2249.96	2215.05	2517.68	3335.53	2801.26	2612.48	2834.54	2283.35	2184	2641.52	2194.69	2632.62	2825.26	2243.69	2156.84	2312.36	2489.19	875.632	996.586	1017.65	1232.62	765.135	1045.97	1382.94	1284.57	1205.32	1108.65	2283.15	2884.13	2949.98	1615.64	2665.23	2626.73	1265.42	1703.57
pos_2891	Oroxin B	3407.64	1995.42	5585.1	1572.49	1227.74	1666.59	1415.84	2379.52	2284.04	1558.48	1488.13	6554.36	6174.12	1809.77	5473.72	4949.42	1820.04	1395.64	2846.29	1668.88	2263.58	1803.93	1301.08	4517.15	1977.44	2320.32	2062.92	6290.07	3483.42	2324.91	10321.3	11545.9	12272.9	16543.4	14750.5	7896.19	11571.7	15115.6	13353.7	8858.24	6878.71	7880.17	2436.11	10128	4088.13	2994.91	10586.6	3497.29
pos_2894	Feruloylputrescine	648.264	662.664	535.304	629.704	555.081	550.544	839.916	667.253	674.066	504.459	503.463	523.807	578.126	663.719	581.086	518.887	470.973	564.743	645.871	590.386	502.5	505.537	563.468	641.578	568.501	495.685	560.251	506.135	551.763	640.541	363.479	393.218	388.764	431.09	373.185	517.991	440.094	373.039	391.242	410.034	487.964	470.619	500.861	397.297	460.888	506.735	448.856	532.386
pos_2896	CDP-choline	14324.6	15547.8	9376.34	14749.7	16450.4	17954.3	15008.6	13711.4	12250.9	21050.1	12908	11096.5	11887.1	13960.7	11557.4	13481.5	15416.7	17248.9	10102.9	11476.8	11225.1	12692.3	12456.1	8191.88	14553.2	13877.1	13026.5	7997.27	10142.5	9774.59	4211.28	5231.55	8393.74	7464.44	3737.53	10675.6	6116.07	5663.96	4976.34	4969.04	9799.98	10065.7	9855.92	7410.08	8335.49	10401.7	6875.97	9115.55
pos_2899	Pavetannin B2	3232.68	2382.38	3444.18	2120.7	2088	2166.67	2532.19	2538.5	2281.02	2096.78	1803.38	4013.88	3942.37	2163.55	3595.67	3414.32	2265.27	1966.47	2798.41	2048.7	2399.01	2233.68	1999.05	3257.26	2337.89	2378.24	2349.58	3802.33	2969.07	2521.46	7664.77	7749.51	8519.9	8570.32	9178.5	4704.22	7223.64	9559.43	8937.45	5872.67	4116.46	4436.58	2377.35	5669.02	3186.24	2802.53	5917	2637.21
pos_2900	Kaempferol 3-O-[6-(4-coumaroyl)-beta-D-glucosyl-(1->2)-beta-D-glucosyl-(1->2)-beta-D-glucoside]	5484.32	2425.07	2144.93	1876.8	3267.51	3419	2243.94	4150.38	1716.47	2716.13	3173.6	3296.33	3731.76	4453.17	2085.29	3087.49	4165.5	3137.31	2899.76	3234.29	5045.35	3151.04	2346.19	2823.04	4052.64	4078.4	3949.58	2272.23	2865.81	2742.27	2307.58	2290.54	1012.29	1318.11	1918.1	905.39	1427.95	1828.21	1089.94	1599.72	1172.89	2236.64	1136.11	1296.54	1540.05	809.738	973.481	897.319
pos_2904	Prunasin	855.926	1151.02	1167.83	1204.18	771.611	868.082	708.1	1080.13	1014.76	810.698	984.64	908.338	1019.69	834.337	845.107	965.575	1034.4	1075.58	1159.07	895.808	1362.36	1122.07	882.031	1227.58	1087.9	1014.6	1047.67	1104.83	1206.86	1352.71	958.785	945.936	880.505	892.818	880.432	746.688	988.073	1243.33	1022.78	936.501	937.083	902.855	1117.13	1133.8	1225.9	892.371	1146.67	924.515
pos_2910	Carboxynorspermidine	116.789	142.085	155.373	143.67	119.161	102.858	131.772	132.03	136.7	110.998	129.513	127.859	128.713	119.221	122.283	125.856	115.514	124.522	129.003	120.928	140.928	124.257	118.74	154.443	123.723	116.983	120.747	116.249	129.634	149.885	100.605	99.792	103.846	88.4106	89.6436	93.4586	103.428	108.745	115.479	100.579	96.1802	107.476	99.1364	101.044	104.601	96.3829	94.5963	87.1669
pos_2914	12alpha,13alpha-Dihydroxyfumitremorgin C	44.869	58.1269	81.1011	71.6254	32.7942	47.5047	54.1564	45.0904	43.5017	42.934	46.536	53.5561	50.5345	34.825	56.6819	46.6414	40.5734	43.9314	57.5594	55.6363	44.0122	53.2478	52.4869	61.1011	42.4373	40.0422	41.0187	51.6223	44.1636	64.5917	28.8655	22.8953	28.7358	18.7387	22.1968	21.895	15.9483	24.2457	23.1579	25.4156	15.3343	16.0072	25.1004	11.6148	24.3287	19.7393	17.0291	7.81064
pos_2916	N-[(7,8-Dihydropterin-6-yl)methyl]-4-(beta-D-ribofuranosyl)aniline 5'-phosphate	4830.8	3922.53	5023.29	3655.5	3198.54	3555.76	3398.02	4980.94	3670.46	3512.84	5103.04	5969.18	5264.07	3573.91	4135.14	4615.79	3347.9	3569.46	4277.1	3953.52	5614.22	4694.66	4097.55	5120.92	4772.53	4473.04	4942.69	4971.88	4409.06	5929.18	5034.21	4512.86	5827.78	4814.43	4682.65	3759.76	4294.16	4796.72	5403.03	4785.34	3027.08	3231.32	2712.61	3830.72	3573.56	2858.1	4128.43	2838.19
pos_2928	7-Methylthioheptyl glucosinolate	1298.58	1841	1473.77	1773.28	1736.76	1585.32	2110.77	1519.19	1866.39	1421.47	1343.7	1337.68	1355.75	1262.02	1587.51	1302.21	1372	1327.99	1492.68	1466.07	1297.9	1306.86	1438.2	1460.34	1344.55	1397.62	1310.98	1328.53	1319.85	1440.81	1079.52	1094.12	1115.01	1134.21	946.923	1075.31	970.926	960.63	1028.17	1022.1	1248.48	1293.35	1210.88	1029.2	1198.49	1282.77	1055.8	1121.1
pos_2934	4-Hydroxymethylsalicylate	111066	97370.1	91861.6	96265.2	108178	107931	120725	102743	106329	102485	95278.6	93283.3	100085	106376	103185	99976.9	103177	101013	97533.6	99154.5	99517.8	105338	100796	96618.6	107823	99316.8	106626	105724	107035	106069	99841.6	100644	94996.5	94132.4	100586	105074	98241.5	98244.8	98018.6	97072.9	106996	105534	99423.3	100530	98142.5	106156	105569	114926
pos_2937	EPIAFZELECHIN (2R,3R)(-)	279989	236531	224554	242287	267124	273249	298053	245415	275491	263669	229970	230769	232987	251064	265261	254864	251767	248345	230325	236907	246411	262494	247558	234380	254770	248046	265956	250484	261200	257419	230662	249106	234326	233436	241606	260681	231258	242717	239479	240904	260259	257812	235033	249264	240521	262969	260635	282521
pos_2950	all-trans-Octaprenyl diphosphate	1372.67	1025.21	365.403	739.978	734.876	421.911	5916.03	699.326	10252.7	1509.97	463.293	557.069	279.275	393.683	518.862	329.078	318.288	363.025	384.633	1372.11	546.145	576.922	1020.95	460.73	1163.98	310.28	358.381	285.418	434.404	346.765	292.096	293.746	301.369	302.068	332.125	394.941	335.724	345.57	296.352	327.046	404.13	406.487	326.933	336.936	409.432	1522.24	436.182	458.016
pos_2952	D-Lombricine	1297.63	1337.29	1307.91	1229.99	1201.03	1141.44	1337.62	1225.34	1237.24	1099.13	1205.4	1136.96	1218.83	1226.53	1160.6	1180.49	1116.81	1188.99	1202.07	1194.14	1175.76	1156.03	1209.76	1313.62	1280.84	1128.5	1150.25	1245.78	1226.39	1330.01	1013.57	990.03	1088.24	976.789	1022.55	1041.94	1000.67	1001.15	1040.28	1003.62	1023.2	1051.99	1050.91	1015.85	1044.96	1051.64	1035.91	1065.17
pos_2953	Taxifolin	43308.4	52510.6	48103.2	63948.6	79869.4	78972.9	112295	42681.6	88209.4	62929.2	92129.1	66540.7	55714.7	88953.5	31589.5	63322.4	65873.3	88648.5	33990.1	48642.6	39034.5	50942	58896	32508.3	52728.4	48958.5	54145.7	42304.2	34295.7	32686.2	39429.6	40444.4	52436.9	54064	46542.7	57971.7	32358.1	32327.7	48778.4	39497.5	70853.7	80432.8	54178.4	33690.5	44287.5	42990.7	36543	60024.5
pos_2958	SAPPANONE A 7-METHYL ETHER	10730.6	10841.7	10400.3	9251.28	9617.45	9310.94	9740.22	10648.7	10266.4	9079.73	7398.33	7937.91	11563.4	12003.4	9762.17	9866.86	10054	9997.19	8539.44	8186.28	8709.14	9484.97	8660.74	9400.21	10407.4	9183.56	9966.35	11181.2	11585.2	10847.5	8201.94	8316.98	6720.55	8096.75	9305.62	9701.84	8082.44	7871.8	8370.25	8832.06	9051.88	8697.06	10055	8774.42	10518.6	10735.6	10269.3	12084.6
pos_2960	Styraxin	8353.22	7939.18	7037.27	7040.5	7651.58	7308.14	8653.88	7806.56	7549.14	6803.77	6902.21	6781.2	7483.17	7838.86	6981.66	6698.02	6844.83	7204.68	7167.07	7108.97	7136.16	7154.01	7135.43	7494.12	7847.26	6802.35	7012.35	7247.9	7521.64	7630.53	6564.62	6307.52	6772.27	6188.75	6395.15	7137.1	6416.56	6370.46	6594.72	6346.38	6803.61	6690.62	6884.45	6430.42	6741.04	6856.49	6868.71	7391.22
pos_2961	Licoagroside F	89669.3	80622.9	76511.6	80033.7	86667.6	85548.1	98600.8	79287.5	88659.9	80344.1	76649.6	75187.2	76004	83008.5	81508.5	77475.8	78220.7	79886.9	76102.1	76873.2	77626.1	81489.5	78031.7	75955.7	82220.1	75854	80617.6	79727.6	81847.6	79587.4	73213.6	76347.4	73662.8	72446.2	73474.5	79437.1	72628.2	74976.5	75283.2	72322.2	80087.1	81372.8	74112.3	75924.5	74205.6	77264.4	76825.5	83692.4
pos_2962	Succinate semialdehyde	53.2198	44.8212	46.7045	47.6809	52.6602	54.339	65.9898	53.2409	45.7918	47.5379	48.0668	44.9723	50.6074	59.7984	47.1857	50.145	50.6183	53.5394	50.1506	54.1586	44.6632	47.3321	47.4485	49.4253	53.5867	47.8377	47.3213	50.3478	52.5011	55.3458	52.3947	48.9276	49.8918	45.9588	54.2319	52.3461	50.2218	45.8123	48.5624	47.4559	54.8969	55.0041	52.2552	43.9071	52.8704	55.1848	51.5612	60.3135
pos_2965	Deoxyuridine	2014.86	1964.76	1866.54	1719.13	1737.87	1683.49	1852.44	1826.2	1703.54	1636.63	1537.11	1577.18	1902.2	1903.66	1699.24	1687.84	1684.57	1709.79	1671.82	1671.28	1724.53	1736.65	1723.77	1792.53	1849.97	1617.28	1749.99	1887.77	1849.36	1880.08	1809.2	1698.35	1885.25	1683.32	1813.8	1822.44	1754.18	1733.24	1826.64	1728.24	1857.61	1745.75	1803.68	1692.61	1887.31	1850.72	1829.25	1985.01
pos_2966	10-Acetoxyoleuropein	22559.2	19993.5	17899.2	19027.5	20203.5	20093.1	21188.5	19072.7	20041.4	19215.3	18316.1	17581.1	17204.5	18625.7	18696.8	17798.6	18324.2	18620.4	17894.5	17777.4	18723	19063.9	17943.6	17853.4	19510.1	18476.9	18249.6	17316.2	18452	17965.2	16610.1	17274	17625.4	16992	16260.9	17496.4	16085.2	17054.5	17663.6	16757.3	16825.3	17429.4	16567.8	16604.7	16493	16712.2	16230.2	17440.3
pos_2972	Phenylacetyl-CoA	2600.48	2433.67	1958.28	2459.79	3009.62	2879.76	4112.6	2503.7	3035.86	2500.71	2319.25	2138.53	2114.17	2410.3	2488.87	2256.36	2416.19	2512.83	2332.1	2493.31	2298.81	2455.59	2461.83	2349.92	2403.5	2421.12	2388.93	2113.32	2403.39	2404.94	1859.01	2067.54	1932.03	2095.73	1655.09	2464.36	1786.9	1777.84	1975.64	1822.99	2485.07	2554.08	2267.08	2145.98	2299.5	2406.31	2098.21	2423.78
pos_2974	5,6,7,8-Tetrahydroxy-3',4'-dimethoxyflavone	5792.66	16362.9	28252.1	16007.4	8099.51	10747.1	7893.87	11927.2	7545.95	11190.4	10378.7	13739.9	19703.8	9734.91	16248.2	12124.1	9733.02	10030.8	13360.2	12145.3	8643.35	9110.17	13552.5	14223.1	10426.1	10450.6	8859.07	16318.3	11873.2	11816.9	2626.48	2602.39	2395.26	5347.25	3603.88	5464.83	3484.96	3034.53	3887.29	3647.12	10286.1	10366.8	11236.8	3817.69	9364.29	9728.34	4583.53	11744.1
pos_2977	(-)-Medicocarpin	1495.15	1881.82	1138.58	1758.6	1681.11	1800.6	2243.99	1031.2	1669.34	2356.58	1666.74	1302.74	1089.34	1470.76	1284.59	1239.94	1616.5	1892.49	1051.77	1365.75	886.175	1048.06	1387.86	799.838	1418.12	1345.86	1004.2	902.656	995.082	864.856	606.31	572.05	694.769	657.459	538.059	1008.96	561.413	637.716	666.419	580.636	852.253	1235.89	1050.24	583.374	744.24	778.071	549.34	864.742
pos_2978	Neodiosmin	723.548	836.055	671.308	791.056	1090.38	1067.03	1176.05	900.212	753.969	738.304	814.015	755.588	741.616	1533.92	793.473	737.622	865.248	689.236	764.096	934.298	777.267	705.399	689.534	706.432	778.832	722.092	730.944	641.599	744.858	696.09	654.346	595.847	573.125	407.283	577.723	554.443	892.717	722.677	682.394	535.786	589.75	570.803	670.715	601.561	566.143	614.101	655.909	721.294
pos_2985	Sibiricose A5	2898.22	2282.71	3060.75	2122.93	2207.57	2265.7	1815.24	2541.03	2247.2	2339.48	1861.66	2510.77	3258.17	2727.72	1906.65	3294.79	2221.21	2327.86	2040.45	1869.63	3643.33	3087.14	1965.14	2601.97	2785.75	2650.7	3060.42	4399.95	3164.79	3310.82	1429.73	1492.64	4750.37	1866.8	7344.52	2601.87	1728.4	2268.36	2083.17	1893.55	1455.34	1363.32	1606.89	2000.16	1480.88	1491.43	2586.07	1645.42
pos_2986	Isochorismate	301.764	233.429	158.196	217.012	374.938	271.723	576.062	243.798	378.357	227.747	173.043	164.279	213.98	216.234	280.297	206.597	246.702	209.69	204.184	267.495	235.798	224.016	200.225	168.677	205.891	175.938	165.96	167.751	254.932	253.797	188.509	228.07	180.97	166.226	101.099	256.148	241.94	182.692	174.004	185.372	246.313	211.182	187.929	289.594	208.383	237.774	293.575	224.145
pos_2988	Cyanidin 3-O-(6-O-malonyl-beta-D-glucoside)	3386.43	2334.15	5873.28	1772.22	2180.8	2973.37	2557.4	3880.69	2744.57	2576.49	1855.65	5420.94	9336.47	3894.62	5900.48	8789.53	4269.87	2630.34	3995.15	2803.68	3536.68	3167.53	1843.92	5348.43	3775.3	3744.27	3810.88	10885.5	5415.45	3587.52	5482.74	6427.99	11489.4	12351.8	11972.3	9482.33	8274.73	8914.44	8412.29	5033.13	9600.37	8211.36	3860.06	8709.83	5668.47	4869.05	9560.86	4716.91
pos_2993	6'''-(3-Hydroxy-3-methylglutaroyl)isoviolanthin	17262.1	17422.2	15278.2	16007.9	16925.2	18683.2	17249.7	16057.9	18390.3	17905.7	14923	16508.1	15408.4	16277.7	19069.5	15270.5	16922.4	15686.5	16262.8	17097.8	16085.4	16619.5	15301.9	14097.5	16266.7	16123.2	17287.1	15736.5	17939.4	15765.2	19585.8	22146.9	17756.1	16038.1	19746.8	17468.4	21650.8	21624.2	18834.6	19717.1	18542.7	17543.1	17583.9	22567.2	16716.2	18822.4	21167	21342.8
pos_2996	Calceolarioside B	1628.19	1240.7	1191.73	1017.88	1260.42	1403.83	937.974	1440.92	1168.73	1453.24	1007.26	1146.58	1247.65	1254.98	1426.17	1290.53	1292.23	1315.08	1160.66	1082.42	1719.8	1454.84	1044.38	1102.43	1442.53	1415.12	1332.9	1213.72	1466.83	1201.92	762.359	805.225	897.639	1409.23	937.133	1244.79	1044.42	1037.56	922.882	962.719	1235.03	1180.92	1031.25	1095.11	1058.19	1183.33	996.886	1343.24
pos_3000	5-Ribosylparomamine	638.5	672.419	682.254	657.684	432.534	502.662	436.906	606.729	542.944	533.779	695.28	661.666	609.358	583.216	516.974	574.976	478.296	651.007	661.797	592.036	797.87	670.018	703.705	838.2	756.446	550.356	594.22	633.735	598.544	853.607	140.372	151.311	192.538	195.715	138.704	260.135	164.743	164.933	146.641	166.947	237.284	208.954	274.221	182.446	347.116	259.701	201.113	311.228
pos_3001	Kaempferol-3-O-rutinoside	3907.31	9776.42	6608.73	8076.67	5279.98	7043.75	3803.19	6411.18	5903.85	6572.68	7681.22	8847.16	6925.75	5206.07	7411.88	5914.98	5865.13	6661.29	7177.08	5534.9	5756.79	4897.07	6474.46	7051.42	6828.24	6884.53	5757.12	5600.35	6414.35	6908.97	3700.75	3269.45	4575.03	2896.84	3414.17	3991.45	7012.85	6586.5	6532.69	4788.04	4381.1	4068.79	5124.39	4764.66	4290.03	3807.68	3845.08	4340.61
pos_3002	Kaempferol 3-[2''',3''',5'''-triacetyl-alpha-L-arabinofuranosyl-(1->6)-glucoside	5587.33	4638.06	4169.63	3760.42	3641.83	4514.91	2556.46	5824.37	4522.09	4503.34	3749.74	3574.88	4193.84	3782.05	3472.81	3723.41	4229.87	3505.56	3065.94	2836	3996.99	3750.75	2947.47	2742.72	4533.24	4386.48	3646.7	3968.55	4688.93	4301.61	2151.17	2090.32	2174.32	4001.88	1873.84	2033.15	5096.41	4178.03	4719.1	4430.08	5156.34	7609.85	5048.87	5961.08	7678.33	6898.19	5965.24	4569.77
pos_3005	Quercetin 3-methyl ether	78043	131395	152358	169233	140000	137409	180444	80165.8	135331	125150	156582	137919	116300	125152	112544	128707	112588	132442	91661.2	121925	61934.1	90724.3	138599	83203.5	103396	101186	102269	100148	75527.3	67798.7	57674.3	59648.4	63782.1	66577.7	73739.4	101778	49111.7	48866	78907.1	55060.6	152740	172103	123732	43233.4	64621.2	90532.6	52502.2	133446
pos_3006	Pregnenolone	1445.79	3408.19	4468.86	4883.68	3182.09	3713.52	4331.08	1494.92	3245.88	3202.98	5483.59	4492.81	2830.05	2976.64	2653.14	3076.43	2858.78	3422.52	2037.15	3310.89	908.639	1988.48	4400.04	1594.13	2092.21	2365.44	2141.01	1835.7	1045.01	593.238	344.201	316.962	369.538	880.932	481.96	2044.28	326.578	284.952	1002	456.405	4862.51	5832.11	2953.06	172.222	841.153	1780.27	235.466	3365.17
pos_3010	6-Methoxykaempferol 3-rhamnoside	2867.15	4261.08	4511.26	4978.06	3640.06	3940.21	4434.97	2664.22	3722.22	3649.16	4755.19	4123.15	3203.89	3414.71	3517.66	3506.37	3405.45	3928.92	2932.38	3570.47	2409.54	2976.23	4382.06	3030.88	2963.1	3222.9	2994.24	2727.11	2449.34	2452.59	1286.52	1355.79	1429.6	1843.16	1425.38	2794.5	1435.41	1517.33	2025.26	1677.98	4112.08	4591.38	2970.37	1290.36	1916.73	2469.88	1454.54	3491.83
pos_3011	N-Acetyldemethylphosphinothricin tripeptide	9730.84	5950.88	17315.2	4536.73	6156.1	8922.97	6890.83	10783.9	7965.1	7499.7	4733.12	16443.7	30089.1	11164.7	18351.8	31787.6	13064.2	7381.11	11848.5	7688.86	10561.8	9213.62	5018.06	16326.8	10632	11428.9	11654.5	38207.4	16275.6	10281.8	16632.3	21582.2	41091	41634.8	42871.4	32494.2	27144.1	31374.7	28298.8	16592.6	30930.3	25769.1	11564.9	30586	18207.8	15727.9	32998.3	14828.2
pos_3013	Biotinyl-CoA	10333.8	10031.7	12301	9463.85	8762.74	9595.65	10013.7	8928.66	9984.6	9396.24	7055.22	12504.3	11296.7	8732.87	14928.7	9775.96	9403.61	8388.6	10041.8	9168.12	7794.32	9163.43	8398.94	9273.42	8637.15	9500.78	10316	13870.5	13283.9	10202.2	23095.6	26284.9	19713.6	15436.6	25853.8	12994.7	25336.1	27366.9	24234.5	22001.3	13162.7	14604.8	11381.7	20705	11607.3	12522.6	21388.7	17165.9
pos_3020	Atraric acid	861.109	708.829	623.883	676.683	623.962	693.495	581.332	797.008	588.835	733.502	859.4	752.434	739.341	739.454	498.213	698.764	680.94	805.263	646.273	706.738	1031.55	998.223	780.975	685.735	877.068	785.478	854.433	672.943	562.614	651.263	964.171	1067.76	853.006	1216.1	891.271	1355.09	1324.04	1242.78	1065.82	1168.49	1354.12	1247.99	1630.96	1210.52	1894.56	1902.22	1224.62	1945.33
pos_3021	Sergeolide	5108.47	4388.71	4305.72	4258.73	4342.58	4193.41	4208.88	4663.42	3606.12	4251.73	4784.48	4302.21	4732.85	5010.78	4031.97	4354.33	4114.67	4756.11	3983.86	4267.99	5558.54	5315.76	4685.12	4148.67	5180.02	4419.45	4688.69	4149.95	3851.08	3994.03	4553.41	4860.48	4607.77	6356.85	4061.21	7249.69	6019.39	5756.45	5363.11	5539.39	6914.86	6355.4	7696.05	5915.59	8502.81	8696.7	6152.74	8839.81
pos_3024	Imidazole-4-acetate	169.679	154.666	140.45	144.961	143.506	149.791	150.819	163.58	158.732	145.201	157.081	139.778	156.666	161.41	128.424	142.351	152.29	156.595	161.914	160.767	177.595	149.305	147.568	164.291	177.181	143.079	165.057	160.246	168.284	170.185	130.338	120.717	128.26	147.172	140.351	162.851	139.273	135.061	136.195	137.56	154.953	137.768	147.983	143.783	164.542	182.817	161.91	170.086
pos_3025	(±)-Naringenin	9788.98	7312.79	7576.54	6861.52	9609.1	10440	9229.43	11501.3	12111.6	10571.6	10196.1	9414.12	12153.6	11364.4	8586.47	11296.2	11351.7	11463.8	9137.58	9490.98	12506.3	11902.3	9070.93	9715.65	11928.8	12143.3	11207.2	9232.48	8722.09	11265.7	9890.72	10891.3	15069	16342	12927.3	15693.6	10897.6	9426.82	9153.55	11904.9	17710.5	16153.7	16674.6	14675.5	19550.9	17867.8	15888	19157.4
pos_3026	Pentahydroxyflavanone	31263.8	35156.3	30493.6	48265.4	69526.6	50866.6	105031	22500.4	82362.4	45687.3	57915.7	43774	29097	61728.3	26404.8	41460.6	42753.4	57763	21026.5	34058.1	19239.2	29915.7	38807.3	18114.3	32767.4	28819.4	33765.4	24199	21391.5	19572	22996.3	24619.4	25199.5	25898.2	22054.8	35725.1	17737.5	18215.8	29134.2	22088.1	40289.3	45422.8	29729.8	17059	23177.1	23397.1	19420.9	34849.9
pos_3032	Kaempferol 4'-rhamnoside	1325.23	1424	1331.04	1750.73	2126.59	1622.65	3006.91	979.163	2468.57	1549.53	1693.48	1462.6	1123.41	1813.05	1218.35	1477.86	1385.16	1780.65	1001.16	1190.43	977.706	1171.65	1344.19	1023.04	1218.41	1164.49	1247.68	953.556	1011.76	1029.87	751.49	795.914	859.096	867.159	757.543	1098.78	655.884	715.572	900.631	724.307	1130.66	1277.27	886.304	634.268	858.743	826.436	672.249	1089.87
pos_3034	3,4-Dihydroxyphenylacetaldehyde	273.616	216.637	366.008	227.533	190.084	194.83	105.594	292.795	250.524	258.13	201.033	231.52	334.206	247.271	230.262	270.345	247.841	274.138	209.298	174.495	285.057	256.775	210.372	252.31	273.371	258.222	227.642	548.601	535.354	405.113	219.443	204.572	366.977	532.827	284.411	661.447	368.616	550.104	397.75	507.294	299.723	229.277	285.215	505.827	324.496	315.362	652.926	318.069
pos_3036	His-Asp-OH	1316.2	2017.68	1572.95	1700.22	1850.24	2246	2493.25	2280.62	2482.65	1962.06	2803.06	2488.52	1798.65	1808.79	1963.71	1607.04	2074.12	1665.52	2484.33	2760.12	1548.82	1591.73	2201.12	2586.97	2021.02	1796.21	2091.32	1591.38	1618.59	1757.94	1049.4	1098.53	966.648	1175.41	1008.99	822.735	1352.48	1293.51	1131.12	1036.36	1236.25	1552.06	1437.38	1167.31	1538	1653.33	1077.52	1291.53
pos_3046	��-Cyclodextrin	8480.22	5720.41	11498.1	4852.07	3878.72	5316.37	5588.19	6117.22	6067.51	5047.24	6208.47	15208.7	9977.76	5231.25	8615.53	6706.54	4733.39	3933.46	7355.07	5738.14	5506.91	5051.48	4421.03	7542.4	5292.14	6019.16	5617.25	10173.6	8568.89	6061.88	35223.2	36889.5	24392	19037.2	36262.9	7831.6	35965.7	41983.2	35931.5	26204.8	9334.93	16618	6149.59	22318.1	9137.99	6862.93	21763.6	8111.82
pos_3051	Levanbiose	1840.32	1687.52	1552.71	1802.78	2005.77	1556.35	2619.59	1713.6	2092.98	1638.71	1517.98	1400.74	1528.61	1716.99	1620.58	1487.13	1523.29	1623.08	1575.26	1876.69	1563.55	1614.24	1713.98	1695.85	1635.41	1492.11	1640.97	1659.19	1579.27	1702.48	998.659	1062.29	1228.39	1381.25	1014.4	1673.37	1032.73	972.045	1123.21	1083.86	1671.18	1641.68	1439.31	1202.41	1454.89	1631.74	1346.84	1697.79
pos_3052	7-Hydroxy-2-methyl-4-oxo-4H-1-benzopyran-5-carboxylic acid 7-glucoside	2076.5	2017.64	1966.08	2019.55	2060.58	1704.38	2490.53	1760.71	1959.78	1773.42	1747.76	1682.51	1859.54	1980.44	1858.03	1837.56	1696.47	1812.93	1796.82	2007.05	1798.75	1825.2	1938.39	1953.07	1876.91	1672.51	1821.86	1984.67	1774.95	1931.2	1320.5	1381.43	1566.53	1501.65	1408.61	1786.91	1366.1	1292.5	1460.73	1374.46	1711.26	1705.8	1555.71	1371.31	1540.44	1697.64	1484.49	1798.91
pos_3053	O-(1->4)-alpha-L-Dihydrostreptosyl-streptidine 6-phosphate	8107.06	12475.7	17180.6	12693.1	6108.92	6153.14	5362.44	8919.88	6181.75	7399.18	7095.17	7037.11	9540.73	8550.6	9370.11	8534.39	6861.11	7857.69	8108.09	7547.79	9828.76	9952.1	8345.24	10864.7	10246.4	9074.75	8678.18	11440	10906.7	12526.8	6248.31	5799.17	6963.43	6358.14	7859.61	6202.39	5574	5877.75	4786.4	6068.68	5533.1	5007.61	5449.01	5360.2	6378.07	5285.74	5850.86	5866.56
pos_3057	Daun02	5983.89	4430.64	6720.56	3691.81	3789.42	4413.01	4677.6	4536.7	5168.64	4136.81	4114.54	9162.59	6689.95	3923.24	7102.14	4812.01	4069.89	3486.28	5443.43	4506.37	3869.53	4010.48	3773.97	5243.35	4167.46	4672.25	4599.66	7332.33	6384.95	4705.3	20384.5	22264.5	15534.1	12026	21374.2	6546.02	21914	24559.6	21380.3	16892.9	7024.13	10169.4	5669.02	14858.2	6899.17	6153.13	14740.6	7812.07
pos_3060	Limocitrin	19618.7	48220.9	71216.8	52191.6	31193.4	38311.5	27510.7	33016.7	31927.7	39925.9	35891.9	40783.3	47854.6	32458.2	46236.5	39221.9	33145.4	33629	38274.3	39137.4	24818.5	28356.1	41374.1	38443.6	34582	33515.4	32547.3	47829.9	37771.7	34399.8	14632.4	16097.1	13460.1	18440.9	17560.8	24128.6	15040.1	14720.2	20641.6	15373.6	36035.7	36952.9	48685.6	14721.5	27922	37938.3	17971.7	49412.4
pos_3062	Chitobiose	1328.81	1801.78	1697.86	2013.13	1761.74	1247.59	1961.62	1217.47	1410.58	1323.12	1292.02	1021.49	1322.39	1484.35	1272.92	1500.53	1104.38	1561.88	1229.15	1279.74	1352.68	1321.24	1244.03	1439.91	1484.62	1238.25	1263.24	1303.16	1299.16	1677.84	621.568	698.766	748.046	701.468	748.23	935.084	677.938	661.544	755.258	670.419	795.816	786.409	951.578	622.577	873.79	820.712	680.196	982.149
pos_3063	Okanin 4-methyl ether 4'-O-(2''-O-caffeoyl-6''-O-acetylglucoside)	2957.57	2968.21	3304.59	2615.88	2101.22	2275.33	2460.33	2613.84	2076.26	2358.02	3075.59	3243.19	2879.33	2297.32	2365.98	2623.24	1989.84	2264.33	2719.39	2721.84	2997.69	2589.1	2629.16	3152.48	2825	2604.93	2287.33	2808.32	2652.37	2712.97	2818.98	2722.2	3355.19	2575.43	2897.55	1744.39	3364.16	3476.39	3741.02	3037.84	2162.9	2966.67	2556.19	3059.79	3005.02	2752.75	3189.6	2630.21
pos_3064	dTDP-L-megosamine	3120.1	3425.96	3446.94	3098.92	2457.92	2470.65	2204.91	2800.39	2375.06	3151.44	3075.92	2878.6	2537.79	2150.03	2764.75	2544.39	2651.04	1943.51	2786.31	2714.3	2840.14	2536.92	2672.5	2810.82	2980.92	3023.72	2426.18	2526.74	2611.66	2625.4	2494.04	2080.94	2235.49	1829.83	2046.23	1414.88	2277.83	2359.45	2497.03	2294.31	1717.76	1922.16	2521.84	1921.2	2304.99	2134.07	1654.95	1557.11
pos_3070	(E/Z)-Polydatin	5172.3	4944.07	4624.18	4785.2	4695.98	4325.96	5581.07	4189.16	5449.86	4512.67	4206.01	3932.22	4536.74	5191.07	4141.82	4648	4312.52	4639	4257.19	5410.42	4328.36	4250.56	4664.65	4812.32	5024.89	4550.56	4750.48	4929.63	4253.17	4602.68	3962.59	4191.9	6396.6	5075.52	4496.2	6110.32	4322.77	4756.56	4032.28	4324.77	5528.79	5300.41	5002.99	4719.7	4836.86	5527.67	5052	6785.42
pos_3071	Linarin	3537.54	4821.66	2738.74	2433.44	3202.28	6153.24	1212.72	4196.05	2578.64	6430.63	8046.57	11246.8	5944.97	4341.35	6576	5113.15	3911.73	5707.83	4262.18	1841.52	5763.57	5031.29	5588.23	4570.05	6295.55	6257.47	4596.88	3099.86	5150.33	3759.63	7511.01	7256.56	9882.49	4711.22	7071.93	7743.8	16833.7	15553.5	17993.8	10919.3	7510.77	6414.62	7692.32	9974.76	4163.32	4482.04	8105.83	4196.89
pos_3072	(S)-4-(4-Methylphenyl)-2-pentanone	738.564	1407.08	1222.58	1333.68	666.341	798.923	621.004	954.371	553.744	745.502	939.124	794.294	951.184	950.311	817.851	863.362	838.046	991.409	1038.05	926.333	989.48	846.453	874.919	1181.28	1071.35	936.927	976.963	904.467	1000.69	1351.52	312.803	287.028	323.805	311.807	365.694	356.078	346.175	302.536	281.673	347.349	346.297	347.857	403.231	344.083	488.206	421.783	352.845	438.872
pos_3073	Procyanidin A1	4592.15	2546.3	3493.39	2536.71	4057.7	4787.33	4903.19	4987.91	3946.63	4472.7	3327.86	3776.48	6855.24	6100.95	4177.95	7561.84	8087.66	4966.91	4909.74	3518.31	5351.12	5960.75	3737.84	4316.56	5807.44	4998.92	6237.43	5003.83	4903.65	3942.33	3553.86	3188.81	6349.79	5403.79	4216.82	5056.47	3708.03	4118.65	5108.68	2739.02	6675.14	4612.58	3478.76	3730.71	5165.61	4875.75	4517.77	3035.07
pos_3074	Picroside II	904.053	1767.25	1306.07	1514.24	1269.19	1497.6	1193.01	1639.3	1750.23	1438.95	1551.03	1510.98	1350.23	1375.28	1180.07	1222.39	1508.26	1385.81	1315.97	1410.36	1286.52	1236.18	1196.37	1385.8	1346.55	1460.43	1465.27	1399.16	1398.45	1521.61	712.574	630.366	548.825	600.434	559.219	468.113	676.441	606.699	687.129	621.803	675.823	717.024	760.713	557.068	787.549	703.137	486.74	637.565
pos_3077	Oleuropein	3901.57	3202.49	3121.09	3200.79	3188.87	2980	3368.41	2444.14	3203.21	2992.48	3287.73	2843.32	2879.85	3157.05	2625.94	3003.87	2730.03	3172.03	2797.76	3171.95	3429.45	3324.7	3305.46	3056.96	3270.27	2855.93	3066.53	2981.3	2777.41	2837.86	1693.26	1836.19	2443.54	2279.18	2120.28	2823.1	2117.78	2110.22	2192.76	2078.72	2306.13	2024.51	2401.56	2114.22	2302.85	2416.42	2292.77	2696.99
pos_3079	(2S,3S)-2,3-Dihydro-2,3-dihydroxybenzoate	274.645	305.009	236.542	309.39	596.827	628.834	537.957	581.269	915.51	691.158	284.232	244.837	366.333	559.531	367.677	409.005	553.536	577.106	286.549	297.583	359.5	361.311	298.328	209.846	447.604	497.755	471.515	604.996	461.789	431.65	486.327	479.219	544.459	633.703	547.154	1285.46	571.196	924.867	907.899	692.569	564.123	534.712	667.601	712.994	268.105	523.246	879.363	785.603
pos_3080	epsilon-Rhodomycinone	1806.87	2165.12	4796.21	2504.95	1418.78	1496.9	1272.36	1869.57	1548.48	1523.9	1787.3	2222.66	2149.04	1693.65	2063.14	1773.19	1312.06	1452.49	1675.24	1535.77	1906.12	2553.62	1747.9	2366.75	2219.11	2029.81	1744.26	2874.53	2744.04	2852.13	4178.87	4007.93	3660.14	2769.53	4065.53	1587.72	4205.17	4709.23	4041.72	3448.18	1671	1920.36	1603.58	2878.6	2001.11	1818.39	2728.23	1862.64
pos_3084	Sphinganine 1-phosphate	138.34	218.873	208.949	189.786	119.378	129.323	130.441	194.523	153.193	168.011	240.868	197.858	234.405	191.824	128.162	191.113	169.722	208.783	214.56	209.911	219.823	204.175	200.029	246.713	223.474	198.132	194.594	189.859	161.678	285.268	44.1584	27.7443	40.4729	62.8593	29.5306	47.0436	50.346	39.2085	31.3551	39.9616	24.9916	36.6433	65.6185	46.676	71.2752	43.856	35.6243	40.7439
pos_3087	Aquayamycin	10701.5	9849.17	14323	9166.84	7488.37	7713.9	8197.18	7846.22	7440.22	7807.95	7949.28	12980.2	10598.8	7472.24	10534	9276.24	7009.68	6385.98	8911.24	7849.39	8335.88	7683.63	7184.08	9430.67	8189.23	8730.47	7868.22	11219.6	10308.6	8345.95	25567.5	26410.3	19539.3	15745.9	26132.8	9205.92	25002.6	28864.2	26257	19992.5	9205.66	12458.4	7951.37	16569.1	9026.25	7694.03	16300.8	8704.68
pos_3089	3,7-Dihydroxy-2-[4-hydroxy-3-(4-hydroxy-3-methylbutyl)phenyl]-5,6-dimethoxy-4H-1-benzopyran-4-one	10097	7462.17	3708.59	5654.02	21558.3	9696.62	16219.9	3624.72	5900.76	9185.17	5074.8	3895.93	4211.5	12080.2	3941.41	7056.81	6813.84	9807.58	4933.13	7136.97	3501.02	5292.2	6316.38	4074.95	5024.62	3668.39	5301.35	3780.12	3155.97	2905.01	7011.6	6142.94	4764.76	3296.33	5603.63	6812.13	2588.46	5016.25	4263.03	3138.86	3586.44	4127.94	3373.2	2253.05	1500.63	2292.35	2892.49	3919.68
pos_3091	N2,N2-Dimethylguanosine	2406.63	2598.18	2440.08	2602.27	1666.05	1564.46	1694.75	1557.06	1266.53	1628.01	1625.04	1583.62	1689.48	1716.05	2290.75	1657.5	1466.5	1832.46	1948.35	1940.52	2142.56	2121.77	2001.31	1835.88	1939.41	1697.82	1782.69	1966.23	1962.45	1994.32	808.586	803.163	1035.17	1352.32	851.536	1774.07	997.458	929.374	997.809	969.484	1735.32	1594.11	1759.97	1007.87	1695.12	1798.78	1080.02	1916.41
pos_3092	2-Descarboxy-betanidin	1615.12	1352.59	2118.83	1078.85	959.11	1127.23	1193.63	1465.03	891.381	1127.58	955.023	1958.4	2770.3	1446.68	1819.62	2456.86	1736.14	1155.4	1776.47	1246.27	1547.1	1340.46	964.644	2051.17	1548.81	1505.58	1667.77	2845.74	1939.78	1614.19	1930.63	2100.58	3310.97	3455.99	3178.46	2474.56	2477.47	2860.45	2491.36	1741.14	2478.34	2194.11	1298.2	2643.55	1896.67	1464.27	2949.01	1359.74
pos_3093	Procyanidin C1	2865.6	1835.51	3347.8	1342.36	1260.24	1564.16	1785.52	2004.97	2217.01	1517.28	2318.71	5109.93	3111.25	1457.92	2453.77	1979.57	1406.07	1171.77	2333.45	1856.86	1615.81	1458.81	1473.18	2560.65	1619.01	1879.14	1686.54	3052.59	2501.95	1995.14	13327.5	13923.4	8447.71	6848.02	13515.8	2345.81	12170	14402.6	12022.1	9701.36	2897.7	5217.01	2035.78	7532.66	3363.46	2246.05	7262.47	2530.04
pos_3094	Glycitin	950.764	2157.6	2477.34	1555.7	727.27	874.045	710.514	1445.9	1648.24	979.304	1001.9	1365.68	1209.23	801	2362.91	916.673	894.095	745.138	1306.03	957.696	853.037	855.66	815.647	1325.27	1019.46	1152.05	1016.27	1334.95	1233.78	1204.11	1199.11	1239.52	880.371	1602.15	1077.7	694.004	1222.5	1084.12	1498.14	1356.08	826.491	1095.96	848.466	1292.31	1096.23	758.771	1161.65	726.518
pos_3096	Novclobiocin 105	6232.49	4285.84	8682.01	3470.38	2540.74	3548	3660.05	4460.05	4649.09	3286.6	5006.27	11654.7	6984.69	3146.27	5692.76	4368.49	2981.62	2375.53	5245.03	4048.13	3634.88	3175.25	3053.34	5648.9	3549.73	4199.53	3750.06	7086.16	5854.26	4417.28	30354.4	31259.9	18078.3	15072.3	30529.1	4946.35	27076.6	32359.8	26762.2	21107.5	6367.34	12190.9	4178.06	16670.2	7188.79	4637.9	16253.8	5515.32
pos_3097	(-)-trans-3,4-Dihydro-4,8-dihydroxy-3-methyl-1H-2-benzopyran-1-one	1475.57	2430.68	3338.29	2331.1	1108.89	1210.3	906.617	1571.58	965.517	1285.37	1304.05	1429.96	1681.64	1412.09	1861.55	1515.85	1329.55	1365.77	1625.86	1442.81	1808.23	1686.25	1526.46	1760.3	1721.99	1724.13	1568.18	2037.5	2053.45	1962.75	616.007	652.052	815.369	979.428	751.33	1208.24	864.149	845.853	818.198	853.233	1556.93	1201.82	1444.75	1063.54	1622.9	1695.72	1135.24	1753.98
pos_3098	L-Histidinol phosphate	1813	1988.02	1888.27	1658.04	2098.45	1562.87	2239.95	1438.95	1654.3	1629.35	1759.67	1620.68	1761.74	1868.93	1540.92	1715.1	1431.87	1697.44	1542.74	1548.1	1618.54	1428.54	1582.89	1738.79	1732.52	1555.47	1467.75	1558.73	1429.21	1646.6	1728.81	1560.88	1937.87	1382	1719.51	1555.92	1683.69	1829.83	1855.64	1582.85	1198.41	1230.81	1260.04	1363.01	1165.95	1106.42	1356.44	1202.34
pos_3104	Apigenin 7-O-neohesperidoside	979.94	1163.06	1622.95	930.556	735.628	836.351	1061.23	1055.23	803.33	1006.46	868.143	1200.12	1037.48	886.095	973.628	833.085	809.336	584.844	1057.47	1122.55	654.835	724.888	743.283	976.498	888.146	840.117	887.935	1292.03	1519.55	883.729	1348.6	1132.82	657.192	679.684	1269.1	474.438	1012.48	1083.46	979.125	874.521	692.605	1012.28	596.775	699.461	552.701	518.408	634.666	544.098
pos_3105	Glu Glu Glu Phe	1953.36	1805.93	1808	1680.57	1719.26	1679.89	1845.1	1813.67	2022.25	1798.17	1813.99	1683.64	1959.31	2100.32	1560.7	1789.12	1818.96	1723.18	1789.73	1750.89	2051.13	1906.62	1751.25	1819.82	2142.39	1744.05	2032.33	1724.22	1639.9	1748.79	2810.47	2485.45	2793.91	1917.34	2583.36	1938.12	2916.75	3006.46	2854.47	2709.88	1702.37	1606.36	1816.27	2646.71	1737.6	1821.65	2756.36	1963.22
pos_3107	Glyceocarpin	2425.34	1477.54	1229.21	981.313	906.264	1066.85	694.203	1107.53	1096.57	1273.62	1196.34	1667.61	1284.86	880.848	1924.39	1224.41	834.456	781.627	994.426	830.518	1670.97	1395.54	1407.44	1289.38	1421.07	1539.46	885.468	853.055	1347.86	976.335	2416.29	3164.6	2497.8	1898.83	3308.15	4141.14	4662.32	6023.13	8446.09	3995.47	1941.59	1656.69	2813.2	2058.36	1188.29	1114.38	1950.34	1229.2
pos_3110	Ononin	1303.04	1956.91	1591.51	1726.35	2526.64	2428.38	1594.27	2793.85	2802.15	2460.8	1626.16	1984.03	2120.28	2312.21	2004.7	2079.62	2876.2	1928.47	2120.94	2345.59	1760.44	1587.14	1584.44	2222.92	2406.31	2038.18	3223.04	1596.46	1598.52	1997.23	1497.78	1551.14	1645.07	1100.09	1769.49	706.295	1553.22	1623.18	1509.61	1434.01	1131.63	1046.2	1214.58	1077.9	1374.31	1302.78	955.681	963.284
pos_3118	2',3'-Cyclic UMP	401.113	302.267	202.831	311.995	558.604	510.752	805.095	329.88	503.644	412.81	384.347	305.427	364.453	496.678	308.579	377.522	463.412	461.602	286.815	437.94	281.998	380.355	407.123	257.978	367.718	334.102	409.265	323.505	322.424	294.776	285.778	299.044	334.897	352.865	253.528	548.054	287.873	255.362	286.658	292.911	525.654	507.379	412.822	367.682	334.892	468.056	369.433	474.514
pos_3120	HoPhe-Thr-OH	4702.24	4355.75	4073.94	4150.45	4032.92	3851.78	4351.99	3693.92	4128.09	4138.24	4158.58	3419.38	4138.72	4654.96	3320.12	4187.11	3980.5	4159.95	3683.55	3901.19	4077.05	4135.18	3954.25	3920.36	4638.4	3816.1	4160.52	3751.48	3759	4189.73	3202.84	3353.01	3867.56	3478.04	3599.65	4075.07	3554.58	3543.3	3250.99	3538.3	3633.05	3437.22	3788.18	3332.62	3431.66	3658.78	3675.39	4126.34
pos_3135	1-(5'-Phosphoribosyl)-5-amino-4-(N-succinocarboxamide)-imidazole	176.347	231.297	148.568	168.158	218.27	129.575	139.21	199.012	294.158	159.128	561.803	213.522	247.159	215.391	110.856	207.762	118.184	389.054	185.142	371.625	460.883	251.895	297.675	216.431	282.003	301.326	171.48	136.119	100.788	358.208	34.8016	39.7437	16.0776	14.4412	23.2393	20.1594	18.5125	10.434	21.1198	30.3897	9.1659	57.5309	66.7587	18.9894	93.5383	20.3068	11.0472	5.91382
pos_3137	Pelargonidin 5-O-beta-D-glucoside 3-O-beta-D-sambubioside	4522.59	5897	6742.46	5475.03	3938.2	3976.74	2141.47	4514.3	2978.29	3801.44	3458.92	4855.5	5647.87	5162.27	6677.94	4822.89	5372.09	4004.08	5191.27	5036.71	7434.42	5961.03	4357.53	5801.42	5556.61	5511.09	6203.02	7005.67	7421.96	6622	5838	6335.95	12073.7	8628.46	7745.61	8645.35	11530.8	9451.69	7470.32	9269.45	12168.9	9804.57	6687.72	10940.2	9270.83	9341.38	11292.4	11227.7
pos_3141	dCMP	4206.86	11124	12478	12646.7	5397.57	6067.1	4721.14	8864.54	5383.86	6870.76	5233.35	6185.99	7760.58	6526.64	10984.2	5888.39	6735.11	6088.21	9538.66	6921.17	5746.65	6843.04	7819.85	8922.12	7369.09	8193.58	7771.37	9101.98	7486.02	9904.6	3503.01	3756.73	2888.11	5415.49	3265.37	4467.45	4060	3721.52	4505.78	4312.24	4165.22	4412.12	5257.07	4524.24	5338.51	5663.76	4547.22	6077.21
pos_3143	β-DIHYDROROTENONE	3955.21	2796.24	3319.07	2736.39	3286.19	3267.07	3525.15	2867.55	3485.82	2711.83	3283.85	3979.33	3952.34	3787.29	2803.6	4415.55	2972.61	3575.89	3071.17	3505.85	3160.72	2699.73	3454.35	3847.02	2808.71	2273.17	2806.33	4309.66	2643.41	2499.08	12895.8	11365.9	30177.6	15024.1	16497.6	10908.4	11885.9	10461.7	11004	10534.4	5151.19	3640.08	3182.09	11615.2	3197.52	3067.75	16057	3545.95
pos_3145	(S)-DNPA	2451.07	5802.68	6462.65	6530.39	2899.11	3009.06	2470.23	4683.74	2530.01	3530.71	2606.89	3021.93	4088.67	3560.82	5734.15	3039.66	3396.67	3109.73	5325.34	3746.11	3139.9	3739.2	4109.78	4841.66	4099.59	4293.55	4225.28	4835.55	3988.7	5510.8	1777.45	1924.85	1451.26	2808.77	1559.29	2263.41	1702.91	1444.91	1722.35	1830.56	2178.97	2273.87	2634.28	1975.8	2849.98	2888.75	2075.41	3191.19
pos_3146	Kaempferol 3-O-rutinoside	1995.3	2068.07	3871.6	1939.16	1166.19	1328.02	1036.25	1768.48	1485.24	1418.61	1394.14	3266.46	3115.27	1435.76	2741.03	2901.88	1307.24	1194.58	1924.98	1483.38	1846.35	1543.96	1292.71	2479.22	1713.03	1765.12	1499.35	3141.21	2106.41	1765.53	6716.6	6782.76	6244.89	5581	7249.25	3044.45	6043.87	7729	7492.84	4836.63	2663.07	3237.54	1672.22	4130.03	2059.06	1675.52	4100.42	1761.09
pos_3156	Maduropeptin chromophore	3089.77	3556.38	3539.84	3467.37	2139.49	2358.35	1679.51	2228.94	894.428	2138.81	2529.48	2578.06	2388.95	2491.28	2434.22	2346.81	2243.47	2390.96	2189.63	2382.71	3569.49	3326.31	2569.1	2500.93	2899.65	2751.93	3032.49	2059.09	2035.74	2165.74	622.957	579.304	601.127	676.044	579.74	767.346	780.955	688.31	645.057	737.143	984.219	939.578	1082.42	695.39	1257.56	1178.28	687.347	1242.84
pos_3157	Secologanin	3028.73	3408.3	3266.36	3005.78	3013.82	2569.91	5097.65	2719.52	3978.97	3556.83	2780.51	2473.33	2999.6	3171.1	2326.86	2787.24	2510.04	2888	2629.98	3346.7	2696.38	2558.92	3315.39	3022.18	3119.51	2493.01	2563.03	2662.76	2566.39	2878.94	2048.6	1930.63	3014.7	2283.7	2265.17	3296.24	2396.54	2232.27	2430.39	2149.74	2184.98	2039.13	2339.8	2045.61	1941.71	2098.7	2453.35	2267.06
pos_3159	Toxol	2906.92	889.22	768.95	541.685	753.596	516.874	1703.97	528.427	760.817	570.375	552.443	666.455	804.405	684.969	603.887	935.493	511.549	618.536	629.886	805.46	570.862	490.608	685.039	724.679	601.668	630.85	447.195	938.951	597.461	507.863	989.723	789.054	6153.97	2652.72	1537.37	2131.19	1155.38	1239.87	958.593	1069.17	841.754	574.064	926.62	1410.06	821.589	769.653	2425.11	755.073
pos_3162	Fluconazole glucuronide	437.541	411.665	464.418	327.929	313.895	212.219	342.562	121.19	272.828	226.302	279.826	392.1	238.468	277.784	384.316	205.664	118.637	181.582	192.255	263.634	291.4	267.489	326.734	194.006	181.433	204.638	245.65	276.15	211.046	144.739	402.317	397.714	686.448	576.318	610.243	533.1	546.961	511.349	629.754	540.58	370.133	289.389	284.108	438.096	260.93	299.077	519.822	329.077
pos_3163	N1-(5-Phospho-alpha-D-ribosyl)-5,6-dimethylbenzimidazole	2192.62	1612	3692.86	1416.9	1526.01	2022.11	1698.68	2164.21	1603.8	1693.74	1327.86	3220.88	4844.77	2628.35	3628.53	4861.34	2845.51	1735.85	2479.49	1860.93	2263.93	2237.13	1353.98	3065.46	2452.54	2450.05	2553.72	6407.1	3508.64	2117.05	2655.7	2865.48	5171.91	6562.47	5222.04	4686.68	3198.36	3314.65	3283.6	2282.07	5859.46	5135.53	2390.98	4040.85	3300.6	3009.64	4536.11	3225.57
pos_3167	4-METHYLDAPHNETIN	1779.98	1702.4	1710.85	1633.93	1437.23	1534.45	1548.71	1563.77	1464.04	1576.79	1596.15	1553.94	1757	1783.16	1303.92	1639.4	1578.65	1528.26	1636.69	1767.45	1764.36	1784.68	1608.97	1662.32	1949.52	1534.65	1855.18	1682.99	1636.83	1600.97	1847.19	1706.82	1637.96	2019.88	1750.94	2153.32	2283.14	2033.85	1887.04	1889.49	2466.74	2372.89	2594.35	2084.28	2616.63	2640.3	2273.77	2991
pos_3168	Asp Asp Asp His	1532.86	1646.86	1882.95	1550.06	1377.1	1439.96	1302.4	1540.94	1599.05	1472.72	1600.74	1484.27	1714.49	1747.61	1270.07	1604.24	1430.27	1509.86	1423.36	1490.33	1845.66	1704.47	1483.81	1630.2	1735.56	1523.02	1612.45	1569.27	1521.9	1571.2	1635.33	1570.67	1855.13	1998.63	1676.68	2007.39	2091.02	1996.93	1838.95	1909.37	2014.78	1866.67	2024.06	2034.7	2184.07	2146.21	2208.23	2372.94
pos_3169	Calycosin-7-O-��-D-glucoside	981.892	1567.61	1467.63	1527.18	1303.86	1410.57	1000.21	2197.11	2419.2	1767.09	875.176	772.477	1523.14	2444.54	976.956	1347.53	2040.53	1906.34	856.35	922.02	1055.55	944.76	856.437	806.951	1438.73	994.358	1268.07	1260.25	1217.51	1215.32	936.842	861.466	804.001	975.061	971.914	1712.1	1632.67	1871.84	1424.24	1415.63	1320.42	1130.46	1783.88	1678.41	1608.13	1895.72	1730.48	1830.49
pos_3170	N-[[3-(b-D-Glucopyranosyloxy)-2,3-dihydro-2-oxo-1H-indol-3-yl]acetyl]aspartic acid	738.208	967.734	959.954	917.832	777.385	655.415	718.542	948.783	1021.2	751.274	741.64	685.229	712.405	1015.64	586.642	720.821	831.582	762.983	630.217	648.526	745.028	728.189	712.334	547.67	866.473	693.002	760.987	556.712	563.018	481.927	811.183	803.364	1014.33	1003.24	1008.67	1092.97	1166.6	1257.58	1185.03	1056.99	951.028	723.78	1093.85	1209.48	1164.83	1268.33	1212.41	1201.29
pos_3171	Ser Tyr Met Cys	2482.68	3197.87	3263.8	3180.96	2184.18	2341.42	1812.25	2551.52	2718.5	2073.68	2346.4	2346.55	2703.98	2459.2	2483.62	2579.15	2461.73	2489.69	2962.95	2558.01	3041.48	2718.3	2492.63	3139.38	3054.25	2698.98	2917.87	2863.05	2962.14	3186.38	2370.23	2466.72	2298.73	2688.65	2477.89	2334.04	2655.23	2329.42	2243.57	2539.72	2582.82	2196.85	3406.58	2891.33	3788.29	3244.41	3188.19	3400.94
pos_3174	Glu Tyr	1416.56	1078.55	895.145	906.188	2364.8	986.31	7063.27	740.82	6987.72	1412.12	819.64	885.575	805.052	1231.65	728.155	1010.18	724.108	864.384	758.576	1623.75	686.689	682.705	1096.89	772.731	949.516	789.768	695.174	753.617	776.423	746.988	834.966	737.007	2134.9	1929.25	1159.64	2903.5	2425.57	911.234	1856.51	816.606	1340.96	1353.63	1345.35	891.336	939.027	1304.41	1774.6	1392.94
pos_3178	14,15-DHET	527.448	1186.52	1252.66	1102.78	407.784	563.401	105.647	1165.24	145.511	739.366	833.638	444.738	929.301	838.868	513.789	872.89	820.736	1065.17	943.177	662.169	889.143	822.181	735.215	1246.02	988.117	891.475	868.179	799.017	821.92	1489.77	246.537	250.367	179.054	330.882	181.984	439.05	432.98	303.528	160.642	339.421	624.783	725.17	905.475	505.419	1680.73	823.636	467.96	908.991
pos_3181	DL-Mandelic acid	369.013	246.175	328.83	224.395	216.339	221.183	95.1424	357.384	224.633	249.949	229.175	281.892	380.793	266.55	256.652	301.234	303.906	291.579	371.115	293.243	523.854	443.617	315.062	383.03	425.282	433.968	389.427	430.283	409.347	471.797	366.021	338.025	279.138	400.064	357.555	284.954	429.054	373.813	335.335	379.384	367.338	293.922	388.805	499.619	473.356	361.294	520.03	358.324
pos_3183	2-O-(alpha-D-Mannosyl)-D-glycerate	867.01	729.091	933.011	583.258	623.842	517.083	845.865	547.515	699.967	534.914	616.65	845.931	850.959	561.587	684.662	797.823	425.274	386.099	522.938	623.008	460.601	487.683	476.721	553.956	554.715	483.621	440.426	698.775	542.315	284.828	2482.82	2190.4	1266.39	800.965	2529.93	561.609	1357.41	1691.93	1506.03	1024.28	399.803	663.373	384.638	760.867	335.314	343.867	693.087	323.254
pos_3184	Benzaldehyde	165.064	115.094	139.083	114.143	97.3925	104.412	62.9609	152.635	116.838	113.836	111.278	120.017	156.82	124.535	108.21	129.568	129.66	136.134	162.63	125.075	213.258	176.222	139.466	180.185	176.486	170.519	168.983	175.841	188.985	200.198	138.597	129.538	135.716	181.379	143.555	131.622	170.539	141.613	146.327	172.841	157.462	126.896	169.154	198.508	207.175	169.621	209.906	164.204
pos_3187	Geosmin	1279.39	1132.01	1366.54	1154.15	1076.11	1097.95	1630.63	1017.04	1073.96	1145.99	1669.53	1579.77	1554.46	1172.54	1285.96	1292.18	1182	1281.32	1529.72	1169.13	1454.82	1635.92	1257.47	1421.33	1109.79	1186.75	953.57	1527.59	1187.64	1702.36	603.336	567.973	1144.09	798.007	547.595	854.012	1281.84	794.797	944.701	1033.24	1000.11	871.631	723.104	778.115	729.339	737.941	725.469	891.088
pos_3192	2'-Deoxycytidine 5'-monophosphate (dCMP)	111.087	133.331	143.47	93.7222	104.367	99.2695	118.382	119.701	128.388	85.6924	150.833	135.742	115.901	145.616	95.6537	122.853	78.9092	113.905	112.232	99.1646	108.354	70.1038	111.501	117.171	132.886	71.5542	109.32	130.445	115.187	134.516	166.008	128.179	171.023	123.409	184.548	160.418	150.447	193.053	148.124	138.167	75.2056	67.6301	101.825	180.967	78.6726	102.288	203.434	114.081
pos_3195	Ectocarpen	107.667	159.19	174.027	203.49	65.5181	54.024	33.8048	111.973	28.592	69.2907	99.7268	90.9446	106.261	79.9999	120.145	76.9521	82.9507	79.2644	181.092	106.228	138.361	102.326	109.695	205.893	131.173	124.564	124.571	155.296	119.433	221.85	16.3529	8.77353e-08	50.1238	19.3057	10.966	25.7027	7.01954	15.9277	3.91075	11.3403	32.5002	20.6061	59.8354	16.5057	73.8938	43.239	11.3303	38.4864
pos_3201	Rhodomycin D	2706.68	2904.77	3132.95	2859.56	2037.13	2177.09	1868.95	2544.51	2585.39	1839.6	2586.28	2576.41	2840.14	2873.66	2398.35	2522.6	2372.42	2909.04	2695.27	2525.98	2915.48	2773.99	2493.24	2799.69	2730.35	2269.49	2833.88	2966.76	2740.29	3160.8	1823.68	1807.38	1978.68	3032.81	1809.45	2919.87	2824.14	2430.04	2301.25	2538.3	3682.69	3339.12	4047.29	2922.35	4615.93	4333.63	3126.72	4365.91
pos_3205	Torosaflavone C	23718.4	24116.3	22084.8	21028.9	22420.7	21110.9	20699.6	26298.6	20170.9	21900.4	32590.1	23867.3	24345.9	23844.3	18024.7	22152.3	21487.3	21919.3	24079.3	28161.3	26585.9	21717.6	27069	26814.8	28719	26453.6	22531	20584.6	20361	29739.9	10675.7	11374.7	12651.9	11947.7	12223.7	10901.3	9842.12	9674.72	8031.35	11810.5	11215.8	12467	16400.5	11898.2	19135.3	14579.8	11466.4	12256.9
pos_3207	Apiforol	9028.46	9474.48	8722.06	8727.76	8178.21	7633.03	7506.99	8736.51	7495.69	7997.4	12359.4	8573.19	8218.37	7897.21	7329.44	7865.08	7034.64	7607.31	9423.09	10460.6	9994.98	7916.8	10276.8	9943.19	10208.5	9096.49	8286.48	6654	6943.93	9921.38	3763.47	3570.83	3681.05	3186.15	3726.84	3613.86	3724.85	3820.17	3028.04	3750.31	3718.72	4275.33	5646.58	3781.69	5740.57	4327	3689.15	4093.45
pos_3210	Phenylpyruvate	69857.2	61032	57507.4	66796.4	75526.1	79284.3	54166.7	90022.6	66362.6	79247.4	75205	62934	79403.3	91837.9	48358.9	76556.5	93985.9	94412.7	58456.2	61497.1	90568.6	87054.6	66473.5	60395	88121.6	77234.3	91556.6	70231.8	74096	73989.4	56484.8	63160.3	54986.8	81108.2	57596.1	78698.5	69250.8	68809.9	59074.4	66730.3	93767.6	86294.2	86816.1	72457.2	104657	105353	74227.3	113560
pos_3214	7,4'-Dihydroxyflavone	911.468	922.008	511.409	369.114	1189.03	510.833	737.13	655.491	962.332	660.808	481.937	619.251	849.325	819.817	537.331	1010.15	487.383	657.819	338.079	280.909	643.814	636.309	408.054	608.853	764.581	659.919	556.55	479.054	655.145	668.968	1655.77	1977.12	2775.69	1303.7	2065.04	1699.94	1544.04	1372.71	1217.92	1702.3	1240.1	773.636	1036.86	1399.66	1237.31	972.6	1591.05	786.103
pos_3215	4R,5R,6S-Trihydroxy-2-hydroxymethyl-2-cyclohexen-1-one 6-(2-hydroxy-6-methylbenzoate)	17326.6	16015.2	14938.2	17027	19760.7	21637.8	14189.9	24073.5	19690.2	20962.4	20834	18183.5	20769.5	23817	11762.9	19635.1	25575.5	25845.6	15426.7	16384.4	23692.2	22219.8	17330.4	16490.9	23366	20823.3	24537.3	17881.3	19226.3	19446.6	17676.3	19580.1	15948.8	23073.1	17682.6	20471.6	20513.2	19625.8	17882.4	19904.8	27153.4	25419.8	24505.6	19785.1	30496.8	30433.1	21313.2	32330.4
pos_3217	Epiafzelechin 3-O-gallate	9601.02	8878.84	5005.19	4134.45	9634.74	4647.77	6767.24	6126.04	8862.9	5945.3	5359.39	5457.9	7832.13	7982.49	4855.73	8634	4588.42	6414.16	3963.96	3534.7	6115.48	5934.87	4591.34	6456.26	7343.46	6116.1	5296.51	4440.27	5848.43	6702.6	13650.1	16158.6	25299.2	12798.8	18602.5	13958.5	12204.1	11876.4	10194.1	14114.8	10919.6	6794.77	8579.89	12009	11061	8722.23	14462.5	7440.73
pos_3218	Dihydrogranaticin	2153.56	2180.23	885.379	673.088	2763.2	1039.78	1640.49	1345.99	2032.89	1424.62	970.938	1314.95	1874.78	1905.14	1087.47	2190.22	949.65	1452.72	583.627	342.111	1266.33	1364.78	755.34	1241.04	1629.98	1403.05	1153.83	905.691	1428.78	1351.49	3809.99	4546.86	6723.9	3077.08	5060.54	4052.84	3498.66	3160.07	2803.72	4076.43	2967.04	1705.54	2364.13	3161.26	2865.82	2289.6	3842.97	1910.87
pos_3223	Isotabtoxin	1218.47	1084	1178.69	1159.78	1805.22	1981.57	1113.25	2008.01	1437.28	1684.51	2398.59	1400.08	2151.06	3444.04	812.181	2062.25	3278.34	4863.12	990.269	937.531	1639.71	1787.64	1039.36	1072.07	1768.86	1254.2	2152.38	1010.15	960.684	1090.92	1637.68	2098.29	3244.35	5273.27	1859.28	3137	2336.55	1803.08	1836.67	2325.33	6396.6	5276.98	3015.81	1960.13	4942.48	5612.84	2170	6264.33
pos_3224	Delphinidin 3-O-(6-caffeoyl-beta-D-glucoside)	2108.13	2128.01	1128.7	853.725	2801.85	1110.43	1480.57	1368.23	2241.51	1512.7	1083.8	1429.95	1828.59	1668.44	1284.63	2310.33	1044.8	1522.52	762.901	521.055	1456.3	1515.62	864.584	1422.9	1659.76	1551.4	1272.86	1042.65	1540.18	1578.28	3667.93	4887.55	6788.96	3167.12	4970.69	3999.43	3352.24	3304.2	3070.26	4235.3	3046.65	1952.18	2391.23	3228.68	3073.49	2390.91	3924.88	2039.51
pos_3228	HUPERZINE A	149.772	219.011	245.556	220.613	96.8208	96.6721	86.1412	140.424	106.572	108.173	154.083	108.195	162.744	150.165	109.629	164.502	119.636	132.605	175.575	142.52	150.11	131.013	149.46	237.806	173.261	140.622	142.519	154.716	144.685	238.529	36.8222	38.2201	52.3993	50.2613	54.932	47.8944	53.7482	32.9166	23.2745	73.8872	35.6517	52.962	64.8623	42.3061	106.576	84.7855	49.442	72.9144
pos_3229	5-N-Acetyl-7-N-(D-alanyl)-legionaminic acid	398.165	571.618	635.676	537.45	150.549	160.121	160.944	342.327	365.449	282.622	405.604	340.706	417.082	305.874	291.365	354.088	237.461	305.232	485.842	450.412	431.951	329.997	433.542	610.174	473.781	376.601	344.326	452.852	378.734	630.966	49.9304	30.2601	114.095	40.3466	88.3741	80.016	55.4353	39.7934	25.5532	73.2946	38.2554	21.4763	113.655	56.6372	141.325	61.9986	80.0632	42.6203
pos_3230	2-Methyltetrahydrofuran-3-one	18.5631	12.4598	14.1412	16.3464	25.3503	25.1168	20.2838	29.5793	19.2414	24.2818	30.095	21.2526	31.7492	40.088	8.07513	26.7157	36.5662	41.5019	15.8935	15.9486	22.1145	25.2692	14.9423	16.1427	28.7893	18.2944	29.7225	13.296	14.5592	16.0282	23.8199	21.6917	30.4556	43.0718	22.911	34.0296	27.8837	23.6002	21.7704	24.0337	53.2189	44.8053	37.0975	24.2493	44.2968	48.9788	29.3952	41.5261
pos_3231	UDP-N-acetylmuramoyl-L-alanyl-gamma-D-glutamyl-meso-2,6-diaminopimelate	734.433	757.94	1175.76	652.25	442.591	517.935	374.56	584.765	373.214	531.468	516.87	830.994	731.273	387.827	1028.55	659.249	462.38	396.331	629.83	473.606	732.974	543.82	483.658	692.136	582.989	645.031	539.64	909.664	722.984	645.371	955.199	853.872	655.707	744.084	1050.11	590.061	719.568	904.223	906.546	724.592	459.339	610.307	347.409	675.273	365.247	294.66	642.328	337.475
pos_3239	3,5,7-Trioxododecanoyl-CoA	3687.19	3935.73	2837.02	3064.56	3619.25	4284.42	3311.98	3262.51	4452.79	4441.92	2563.15	3385.85	3200.58	2667.51	5413.59	2985.93	3525.78	2699.61	3750.42	3955.81	2423.71	2767.12	3111.51	2904.11	3253.5	3654.8	3244.68	3433.93	3763.93	3005.08	3488.47	3837	3633.45	2859.84	3560.03	2828.6	3824.46	3642.21	2967.11	3640.71	3581.68	3194.09	3699.77	4303.82	3014.79	3629.83	3470.84	4149.49
pos_3242	Floxuridine	1776.75	1704.55	2132.08	1452.13	1235.84	1288.31	1541.97	1514.56	1682.99	1356.69	1597.54	2132.57	1937.89	1524.3	1642.43	1593.5	1359.77	1351.19	1539.47	1357.38	1619.56	1425.76	1336	1743.08	1750.76	1823.87	1445	1808.29	1829.82	1737.27	3951.78	3953.74	2931.38	2560.34	4527.81	1993.08	3889.66	4641.36	3530.12	3146.77	1672.36	1942.98	1915.59	3031.64	1899.04	1523.3	2752.59	1444.02
pos_3243	Chrysin	44241.9	61431.4	59205.1	63131.7	54473.6	54303.7	57013.7	39971.7	62175.1	49312.2	49483.9	49784.8	54930	58065.7	64323.6	55552.4	54024.9	55407.2	39714.7	50456.6	30084.4	41972.6	53683.7	39156.4	49298.1	42371.4	49050.4	62164.5	58319.3	38218.4	40841.4	36540.5	25878.7	46761.7	44377.9	53639.8	49440.2	55637.2	55767.2	50487.8	51565.2	55363.1	48383.5	48412.4	27493.4	40004.4	52339.3	52976.3
pos_3247	(1-Ribosylimidazole)-4-acetate	1068.61	1054.43	1157.15	1024.26	702.857	771.137	612.85	944.979	519.127	829.568	835.405	900.388	1035.84	887.2	994.828	1040.31	827.056	855.847	1037.66	1066.66	987.352	1001.57	1074.25	1096.35	1085.98	912.582	1028.9	1166.68	1211.06	1022.58	561.766	511.213	473.974	663.835	687.005	804.897	857.49	803.206	804.737	919.363	1019.44	892.946	799.445	794.04	887.978	876.808	814.055	974.806
pos_3249	Phellodensin D	2388.72	2119.25	1961.04	1929.15	2057.12	1918.2	2356.35	2037.68	1658.38	1885.22	2243.59	1971.63	2106.92	2361.8	1721.29	1962.78	2246.87	2080.96	2037.82	2123.76	2626.44	2236.03	2069.86	2073.43	2384.18	2017.61	2370.89	1943.39	1873.47	2014.42	1874.68	1572.38	1770.17	1414.71	1746.63	1515.85	1938.32	2112.09	1839.17	1767.37	1448.11	1481.38	1626.79	1755	1596.49	1677.18	1756.77	1704.05
pos_3259	Kaempferol 3-(3''-p-coumaroylrhamnoside)-7-rhamnoside	4312.29	3481.87	5129.97	2987.54	2479.41	2956.49	2764.51	3363.71	2959.63	3096.42	3367.34	5912.66	4694.68	2920.7	4108.46	3504.93	2741.91	2603.87	3237.65	2742.77	3794.36	3307.13	2719.54	3703.17	3375.6	3494.6	3201.74	4425.76	4162.81	3540.08	12894.3	13318.5	8667.09	7694.97	13161.8	4965.64	12708.2	15704.7	11296.9	9976.01	4726.79	5782.67	3502.18	9547.81	4732.41	3766.87	8336.49	3511.43
pos_3260	Secoxyloganin	3036.46	3023.84	2170.94	2430.94	2978.44	3257.38	2836.52	2603.16	3451.54	3542.53	2081.89	2482.21	2559.66	2178.31	4056.6	2384.59	2855.04	2267.18	2985.96	3097.32	2065.53	2293.41	2547.13	2275.27	2668.12	2918.45	2560.09	2623.93	2948.87	2417.59	2222.36	2563.4	2536.86	1964.1	2390.73	2090.06	2809.72	2415.61	2010.82	2670.51	2871.98	2394.92	3062.03	3232.22	2421.9	2967.13	2595.85	3269.94
pos_3263	Pelargonidin 3-(4'''-p-coumarylrutinoside)-5-glucoside	1717.45	1333.67	2143.5	1074.75	903.22	1131.58	997.091	1426.05	1382.9	1208.44	1241.12	2562.15	1895.37	1087.86	1767.95	1436.28	1080.81	909.186	1340.12	1095.05	1457.69	1256.82	987.229	1526.74	1257.85	1373.61	1313.89	1946.29	1713.7	1457.8	5964.27	6604.88	4073.49	3579.59	6325.41	2195.67	5973.69	7882.26	5292	4719.64	1981.51	2494.73	1327.6	4542.77	1954.05	1517.86	3793.46	1361.23
pos_3264	Hyacinthin	3448.75	10488.4	6686.17	8315.13	6777.76	7474.8	6807.45	9941.24	7494.89	8725.88	7526.14	6342.69	6373.47	5623.96	7032.82	5476.57	8020.07	5657.15	7570.55	7678.97	4163.31	4384.68	7129.64	6843.38	7091.91	7566.85	6432.15	5675.4	6151.06	6113.07	3104.99	2904.24	2239.11	3786.3	2511.54	3168.92	2804.97	2527.03	2947.52	3022.57	4919.55	5215.91	7437.34	2758.78	6738.87	6149.28	2664.4	5109.29
pos_3268	2-Fluoroadenosine	4829.96	6313.62	5688.51	6044.61	4779.79	5354.91	4350.97	4465.32	4255.68	4305.4	5779.46	4059.19	4358.15	5337.86	4658.03	4147.76	4486.37	4904.12	4866.44	5289.87	4565.17	4538.71	5917.53	5122.1	5786.34	4515.25	6119.13	4668	4975.84	4867.47	5910.57	5839.71	4436.07	4377.4	5145.95	7104.09	5718.88	5189.67	5251.68	5439.72	7405.3	8516.85	8234.65	5337.44	7413.34	9176.81	6245.14	10872.2
pos_3270	5,6-Dimethoxy-[2'',3'':7,8]furanoflavanone	2581.01	3717.77	4340.94	3827.55	2900.51	3233.52	2762.51	3328.67	2749.65	2864.55	3011.18	3500.01	3652.11	3166.97	3901.88	3552.06	3156.51	3232.52	3506.86	3104.04	3332.33	3180.79	3193.03	3615.54	3207.53	3260.34	3197.69	3770.8	3484.57	3763.39	2898.62	2757.61	3057.94	3542.2	2910.03	2988.98	3077.56	2732.01	2952.01	2986.22	2853.5	2807.22	3887.73	3296.83	3150.62	3362.92	3435.62	3650.43
pos_3273	Hosloppin	1587.61	2263.62	2278.07	2073.5	1693.12	1953.91	1994.23	2156.19	2100.33	1872.7	2710.2	2205.05	1831.73	1645.81	1716.85	1733.14	1704.25	1553.83	2056.35	2168.36	1668.1	1630.05	1982.1	2236.19	1857.7	1693.03	1837.01	1747.69	1701.02	1906.1	1113.97	1107.62	965.934	1097.47	1762.81	1022.57	1199.84	1085.33	1009.29	1066.9	1264.32	1518.63	1525.98	1076.96	1673.8	1601.02	1087.69	1364.65
pos_3275	Asp Asp Cys Phe	1366.17	1533.59	1415.38	1440.19	1627.96	1470.16	1704.72	1601.57	2182.75	1541.9	1159.31	1188.83	1488.47	1798.13	1350.92	1385.17	1660.02	1603	1059.48	1232.09	1246.12	1104.25	1259.83	1003.47	1393.99	1131.95	1289.87	1316.22	1215.98	1277.38	1222.7	1122.39	1386.82	1773.24	1299.11	1922.26	2215.13	2409.66	2415.03	2152.42	1544.28	1402.36	1724.65	2833.67	1665.12	1900.23	3170.98	1839.85
pos_3276	Cornuside	17072.1	24380.4	20182.8	26185.6	20950.9	25117.1	17743.7	16308.9	17541.4	17645.6	24746.5	14478	12409.7	21134.2	19351.5	14034.4	17990.4	19714	18756.3	22794.1	17520.5	19184.8	27547	18173.2	23321.1	17500.6	28661.5	17158.1	19537.8	16161.3	28896.3	30142.8	17779.3	19318.7	21724.4	36392.2	25999.9	23124.8	24638.3	25901.8	39374.1	47252.1	44048	25826	38018.1	51051.8	31198.9	62535.1
pos_3278	Specnuezhenide	1146.4	1104.69	1843.71	971.98	780.563	782.427	864.592	945.343	636.387	808.147	1081.23	1386.83	1394.81	827.345	1236.55	1550.82	847.815	871.357	1041.21	994.955	1405.4	1295.27	1097.34	1332.52	958.398	1158.61	979.092	1426.81	925.627	1065.67	715.402	796.95	1471.39	1308.46	1374.1	1314.67	1024.35	1036	905.189	1078.9	1076.42	994.455	1071	1184.35	1136.65	1060.53	1255.48	1163.98
pos_3279	Loganate	1990.38	4146.49	4117.45	4041.71	2301.38	2495.47	2090.23	2719.82	3139.16	2565.46	2350.06	2359.95	2317.42	2334.35	4318.99	2298.13	2458.59	2270.87	3435.98	2977.36	2371.56	2320.29	2937.92	3076.35	2812.95	2797.78	2850.67	3210.88	3068.95	3260.04	1535.23	1742.66	1211.54	1692.54	1385.31	1717.13	1693.06	1427.14	1768.98	1749.46	2049.33	2202.8	4995.31	1984.88	3262.21	4125.17	2098.79	4755.4
pos_3281	Carbamazepine	1041.2	1064.24	1097.54	1001.38	912.743	862.337	1163.44	815.99	1129.32	848.522	1004.49	1011.67	956.613	942.359	892.616	964.207	792.635	900.536	877.375	862.689	878.389	804.509	911.489	1005.92	1005.36	894.687	885.593	990.485	960.263	1037.93	604.739	595.168	891.782	657.134	702.745	891.291	688.714	598.446	628.448	766.464	644.005	630.864	816.186	605.796	737.968	723.218	663.021	751.852
pos_3282	2-ETHOXYCARBONYL-5,7-DIHYDROXY-8,3',4',5'-TETRAMETHOXYISOFLAVONE	132.546	59.7774	58.2643	47.9224	86.3893	19.2324	146.74	19.1103	49.5681	14.846	30.8795	65.6808	39.7416	21.2146	59.6548	35.5942	19.6498	26.6993	17.4855	27.5177	25.375	36.886	24.7282	13.4387	28.4692	21.7746	20.7267	27.1453	39.4369	30.4174	278.965	251.028	281.852	272.445	458.13	245.218	237.762	288.977	358.11	256.546	235.598	200.478	128.919	194.142	81.5757	120.01	308.588	149.792
pos_3283	Flavanomarein	1345.74	1063.18	1778.27	838.222	740.369	905.842	670.109	1196.72	1023.73	969.67	922.595	1788.45	1289.81	739.741	1383.87	1113.37	841.721	711.019	1057.78	801.376	1217.54	966.22	751.161	1138.99	1002.09	1217.34	990.212	1785.25	1561.95	1039.22	4114.46	3707.99	3174.93	2474.77	3826.88	1449.68	3838.76	4817.14	5193.59	3379.85	1664.84	2123.33	1106.7	2830.42	1412.8	1191.18	2724.23	1172
pos_3285	Littorine	1850.19	2130.61	1834.14	1938.38	1610.44	1500.37	2168.33	1799.26	2372.85	1649.73	1505.88	1392.5	1701.26	1851.67	1477.51	1502.18	1420.44	1575.06	1586.18	1744.94	1476.21	1539.07	1662.55	1877.87	1659.29	1432.44	1651.4	1589.26	1508.2	1887.77	976.526	904.086	1288.08	1121.9	1011.43	1311.65	1100.7	924.319	969.808	1146.92	1275.73	1298.86	1220.22	1060.25	1267.99	1239.88	1134.73	1343.61
pos_3288	6-Lactoyl-5,6,7,8-tetrahydropterin	3378.79	5862.73	5088.4	5055.64	3900.33	3634.1	4269.63	4209.72	4456.03	3859.94	3747.96	4395.46	3958.07	3241.95	5449.92	3737.19	3669.93	3292.99	4516.29	4172.72	3105.09	2913.25	4032.21	4058.03	3871.9	4244.56	3456.7	4363.5	4731.33	4107.48	2375.84	2209.83	2733.38	3294.42	2509.58	3180.47	2954.77	2887.39	3001.86	2971.24	3323.49	2979.19	4901.68	3340.83	3818.39	4102.41	3427.72	3956.16
pos_3293	(-)-Glyceollin I	3324.35	3460.79	2754.42	1875.31	4032.85	1895.27	1993.26	2290.05	2326.1	2559.05	1941.97	2680.41	3557.39	2819.4	2588.1	4097.22	1949.31	2704.84	1600.1	1177.7	2806.05	2780.92	1898.76	2537.69	2899.58	2752.28	2370.88	2130.57	2886.45	2975.84	4326.96	5278.4	6307.4	3385.93	5572.02	3720.65	3522.51	3333.42	3272.8	4413.97	3561.58	2412	2959.18	3483.44	3700.44	2927.58	3793.6	2172.02
pos_3296	1-Deoxy-11beta-hydroxypentalenate	737.006	703.759	758.368	665.937	595.732	597.986	569.874	695.73	790.098	649.328	642.06	743.2	876.685	688.809	778.101	736.19	663.469	716.187	674.202	585.119	645.356	671.788	624.176	692.332	661.57	647.772	669.538	907.433	807.796	805.118	600.338	566.274	994.161	726.432	685.466	964.214	702.928	744.756	743.873	790.978	1119.51	1015.66	1110.45	779.422	817.853	879.001	859.286	1116.71
pos_3299	gamma-L-Glutamyl-S-(hercyn-2-yl)-L-cysteine S-oxide	1107.2	1072.47	1009.45	894.86	871.903	736.896	1129.28	725.373	892.99	724.517	787.948	771.356	901.358	920.349	596.46	884.465	783.48	790.604	682.221	733.551	692.16	732.739	716.017	570.365	794.189	701.418	700.781	652.515	504.603	562.566	917.071	915.945	1365	1380.79	1112.13	1211.07	1104.29	1157.6	1113.94	1090.07	929.502	825.021	848.512	1240.31	922.796	868.917	1447.91	909.042
pos_3300	Salviamalvin	4377.3	6376.97	6266.24	5459.54	4887.96	5942.06	5660.79	6884.77	7140.22	6214.17	7523.27	7603.42	6142.75	4378.53	6364.94	6294.27	5564.46	4101.74	6023.76	5891.24	4493.53	4519.14	5226.67	6490.56	5078.43	5748.94	5822.88	6600.69	5487.61	5044.44	3646.72	4199.49	4708.61	5227.22	5162.37	2878.97	4383.24	4464.65	4298.21	3432.1	3711.9	5083.11	3949.69	3869.51	4538.7	4250.57	3644.5	3574.69
pos_3303	Gancaonin B	13229.2	11125.3	10449.8	9953.06	12230.8	9860.64	14478.1	8074.5	9568.79	9670.79	9345.36	8185.09	9084.1	10343.5	8808.6	9935.46	8512.35	10033.9	9155.32	10005	10273.1	9659.19	10620.3	10329.1	9846.31	8261.11	9014.35	8898.48	8252.88	9244.83	8765.33	8876.44	11250.9	9415.88	9573.02	13170.2	7521.66	7944.24	8361.45	8449.03	8819.77	8851.5	8227.63	7720.22	6701.06	7555.64	9350.98	8979.85
pos_3304	3,5,7-Tris(acetyloxy)-8-methoxy-2-(4-methoxyphenyl)-4H-1-benzopyran-4-one	734.606	926.995	803.161	650.675	675.884	716.701	956.021	645.894	1882.83	986.863	735.152	925.501	727.112	972.485	606.734	730.056	575.907	669.032	762.41	584.486	606.98	538.427	640.946	693.448	748.198	1187.33	665.713	591.347	576.452	686.128	3621.61	3574	3013.32	1629.42	3359.25	1045.7	3584.61	3412.03	4163.4	3462	679.089	657.098	593.937	1987.29	622.064	500.768	1535.67	403.914
pos_3315	Isosakuranetin 7-O-rhamnoside	8890.46	7031.38	5090.16	6744.72	9497.2	7273.94	11094.6	4436.81	6931.89	7890.4	6085.63	5414.64	4466.54	6451.71	7649.33	5208.42	5603.77	5655.76	7694.85	9028.12	5081.71	6253.06	9159.5	5880.23	6195.95	5540.15	6594.04	5765.86	5114.17	4319.23	4225.43	4082.78	5443.34	5097.65	4286.32	8014.41	2549.56	3890.75	3907.94	3349.44	5467.37	6413.27	5165.74	2844.75	3088.56	4398.5	3323.69	6114.25
pos_3316	6'''-Deamino-6'''-oxoparomomycin II	3133.99	2432.89	2171.85	2263.64	3238.22	2557.93	4505.81	1815.76	2279.93	2434.54	2310.73	2038.77	1926.39	2538.78	2352.9	1997.86	2101.37	2196.47	2433.15	2872.43	2205.51	2422.24	2818.56	2147.54	2330.12	1980.74	2362.42	2063.32	2037.82	1898.89	2353.83	2283.37	2420.6	2239.08	2254.73	2858.29	1933.41	2533.09	2318.74	1938.08	2295.1	2628.13	2203.45	1805.84	1532.21	1980.02	1869.44	2499.42
pos_3319	Novobiocic acid	9184.82	8271.17	13164.4	6487.9	4725.61	4952.6	4934.41	8231.14	7576.12	5892.68	6474.62	11071.4	10228.4	6041.39	8134.04	6988.78	5077.77	5227.51	6096.05	5725.6	7032.19	6311.24	5371.04	7839.35	7469.92	7191.04	6520.7	10541.3	8940.51	8333.95	50982	49962.1	32517.8	21019.9	47663.1	10464.1	44411.7	53759.4	39007.4	33274.2	8786.46	10480.3	6749.8	28300.2	11530.8	7002.81	23957.2	7708.23
pos_3322	Gambiriin B3	12051.4	7227.34	17447.8	3856.95	3494.81	4267.34	4032.8	10061.9	9890.18	6076.54	5572.8	17093.6	12258.4	4017.83	9845.14	6814.05	3681.23	3708.98	4672.13	4115.3	5637.67	4664.58	3404.4	7900.18	6186.76	7274.71	5327	12649.9	10242.9	6885.64	106727	114308	69027.8	41573.2	99834.5	16851.9	91029.5	120797	84757.2	71877.9	13062.5	17050.6	8155.35	60035.5	19298.2	9048.48	47755.3	10749.8
pos_3325	Isopentenyladenosine-5'-triphosphate	188.909	113.213	209.122	39.7081	53.3964	57.1752	100.621	136.801	173.029	121.917	69.9462	214.77	194.035	51.5951	123.972	103.853	90.796	46.0684	57.2141	63.5694	78.9711	55.697	49.6767	91.0383	97.4542	163.67	64.2165	208.903	139.477	91.2042	632.811	678.777	663.978	493.141	598.221	300.072	597.494	585.061	655.67	584.539	224.188	264.459	165.6	583.066	253.959	160.386	522.795	172.371
pos_3326	Flavonol 3-O-beta-D-glucosyl-(1->2)-beta-D-glucosyl-(1->2)-beta-D-glucoside	7492.27	5406.41	10846	3547.14	2915.98	3232.11	3102.62	6273.35	5790.09	4180.32	4211.49	9866.15	7460.86	3114.56	6127.54	4717.1	2936.67	3031.71	3650.69	3192.84	4218.86	3660.61	2996.75	5333.11	4463.46	4920.21	3860.94	7732.35	6314.58	4853.57	54856.1	58810.6	36623.1	21820.4	53581.1	9173.21	47181.2	63115.9	44004.4	37562.5	7254.08	9146.99	4976.55	31287.2	10496.2	5325.74	25603.3	5915.18
pos_3329	3-Methylglutaconyl-CoA	2135.23	4846.53	3319.72	5180.71	3964.7	3804.33	2740.2	4500.32	6452.77	3637.15	3873.45	2888.92	3817.45	4268.26	2586.36	3472.49	4262.98	4851.27	2625.66	2816.61	4139.44	3686.94	2949.24	2842.03	3488.12	3877.87	4169.86	3354.74	3208.05	4857.32	816.146	837.251	736.178	803.018	759.933	783.411	811.551	784.073	762.241	795.804	1265.46	1326.46	1955.91	803.08	2148.64	1706.44	697.205	1823.68
pos_3332	Moracin L	1973.01	2603.71	2950.91	2834.64	2580.19	2342.67	3052.79	2267.02	2507.51	2388.36	2286.93	2263.01	2534.21	2597.07	2833.28	2532.5	2199.89	2454.97	2522.97	2459.42	2185.58	2206.69	2628.44	2446	2276.33	2197.76	2390.85	3697.82	3046.07	3025.82	2423.09	2176.29	2462.36	2843.19	2516.29	3369.26	2373.83	2536.71	2991.02	2893.07	2664.39	2542.39	3024.8	2944.75	2093.43	2518.99	3325.51	2906.83
pos_3337	2-Hydroxydibenzofuran	19.4174	17.4137	22.2618	6.92301	26.48	1.46013	31.0827	1.47955	1.7626	1.50217	0.332499	3.05635	9.87738	0.880518	5.98995	5.24468	15.0229	3.83948	13.8284	3.75431	3.14792	1.9229	3.36323	7.34047	1.76561	0.747947	1.08262	2.13264	37.9988	5.69789	115.858	139.29	201.273	78.2331	244.516	22.5057	119.387	186.662	199.01	149.148	50.3564	18.505	35.2751	120.653	44.9301	21.5373	135.874	0.0511134
pos_3344	Gibberellin A5	6193.16	6142.98	8414.84	5633.91	4397.86	3748.21	4342.3	4454.24	3225.25	4179.56	5186.23	5240.52	5947.77	4597.92	5062.35	6454.35	3785.66	4865.36	5333.5	4790.23	6449.32	5393.98	5129.89	6571.44	5492.74	5013.74	4562.31	6197.28	4658.46	5988.65	3690.42	3737.31	6251.71	4927.16	5678.9	4905.8	4015.11	4148.7	4271.12	4258.4	3638.8	3002.39	3857.26	4110.2	4150.78	3393.96	4626.48	3644.78
pos_3353	p-Coumaric acid	26638.7	48528.2	45483.7	52018	44356.8	45295.7	45185.4	50178.2	50313	44761	45005.7	38856.3	45229.9	48856.9	49232.6	41530.6	50252	43956.8	47571.9	47015.7	37380.6	40333.3	45705.6	45223.5	49344.8	45940.9	52998.5	48302.5	42994.3	47149.4	25816.8	28964.5	16231.5	33997.9	21863	33625.2	27296.6	22465.1	24471.7	26558.9	41324.1	43391.7	48644.3	29532	49689	53220.7	30651	57425.3
pos_3359	Afzelin	2029.13	3175.96	2948.03	3026.88	2491.87	2436.18	2504.57	2949.97	2670.86	2414.33	2717.26	2400.32	2921.14	3042.11	2619.97	2579.49	2739.74	2611.75	3032.51	2763.91	2389.56	2438.85	2665.77	2904.86	3140.46	2730.36	3022.72	2699.39	2497.86	3003.12	1553.81	1504.19	1303.76	1792.85	1479.07	1714.96	1567.15	1283.34	1341.57	1569.19	1953.11	2106.84	2528.81	1568.31	2538.15	2515.39	1659	2749.94
pos_3361	Eriodictyol 7-(6-trans-p-coumaroylglucoside)	100830	193606	180625	216349	185918	198833	189012	201172	222815	192682	185665	168554	175378	188837	223192	172446	210189	188253	193523	196761	149251	163421	192194	193741	186952	196658	216522	193569	177788	202266	76574.2	95117.1	45273.4	126739	63855.8	116808	80516.7	63029.5	73265	82960.7	152971	163154	183533	90942.3	191930	214740	98541.6	231645
pos_3363	(Glutaraldehyde)	34.6289	61.2258	55.692	62.9343	55.6732	55.7951	57.3853	59.3969	60.4104	53.3886	58.8453	54.7967	60.4321	61.7723	58.4965	49.748	60.0045	63.2933	64.3006	61.8578	44.4372	47.4273	56.612	65.9851	62.1306	54.0962	66.8558	66.6229	59.6116	67.2305	31.3093	33.3469	18.0956	43.945	22.0184	40.9204	32.3955	19.2681	28.6495	30.9067	49.084	50.5725	62.4251	33.4255	62.0648	68.3322	36.9475	64.7063
pos_3365	Calabricoside B	3582.14	8971.31	8291.58	10340.7	8221.81	8885.92	8038.47	9779.43	10345.3	8777.31	8805.36	7396.72	8460.96	9536.87	10292.7	7652.1	10118.4	8660.37	9419.29	9578.83	6471.72	7303.45	9050.24	9104.5	9104.4	9148.69	10797.4	8889.41	7802.76	9253.65	2232.94	2894.76	1082.18	4806.48	1516.82	4293.19	2735.74	1705.35	2137.55	2536.24	6362.32	6896.44	9035.15	3121.34	9068.08	10089.7	3366.78	10668.7
pos_3366	2-(Methylthio)propane	7820.71	8277.82	7842.98	8455.66	8568.24	8838.95	6897.97	10184.9	8081.84	8850.12	8962.37	7539.74	9538.27	10511.9	6829.81	8763.94	10379	10351.6	7839.41	7791.58	9764.39	9389.51	8119.18	8005.36	10391.7	9107.85	10332.1	8812.81	8793.34	9278.4	6317.56	6583.04	6114.23	8589.28	6249.75	8521.77	7505.08	7090.22	6278.66	7148.42	9752.41	9215.81	9824.96	7618.4	11031.1	11058.3	8045.99	11918.7
pos_3371	4-Methylthiobutyl-desulfoglucosinolate	175.006	135.796	124.987	158.165	226.607	203.324	286.293	154.759	219.524	178.741	150.593	158.452	139.782	165.663	173.621	161.44	175.984	162.623	135.421	151.946	154.045	161.596	162.066	146.357	148.958	167.421	161.19	145.336	148.759	163.859	142.814	177.985	103.974	169.477	106.592	190.146	144.462	135.674	165.451	171.084	199.227	214.523	160.703	172.19	154.277	186.813	163.822	195.404
pos_3373	3',5'-Cyclic GMP	451.81	436.037	381.323	516.229	657.397	610.214	916.651	524.491	748.131	559.947	466.716	439.934	434.688	521.263	588.142	483.488	561.78	525.812	526.841	559.48	455.103	512.131	527.955	430.067	505.91	514.045	515.683	480.852	491.367	447.467	513.444	554.257	267.085	524.174	340.577	539.153	486.574	404.267	516.161	468.829	662.014	689.975	587.137	522.904	548.655	633.33	478.504	613.565
pos_3374	8-Demethyl-8-(2-O-methyl-alpha-L-rhamnosyl)tetracenomycin C	1902.71	6054.29	10432	9031.17	3228.83	3164.75	2599.13	3437.45	1826.47	3520.86	2836.62	3740.36	4593.8	3504.93	5069.01	4230.59	3587.04	3613.81	3819.51	2989.82	2814.98	3170.81	4247.26	4331.14	3485.71	3733.39	3601.96	6863.44	5543.03	5429.3	735.606	789.012	760.089	1192.09	825.34	1496.47	911.635	819.98	834.223	856.305	2803.08	2387.25	3155.42	1119.92	3522.35	3578.04	1256.65	4064.96
pos_3375	Miraxanthin-V	1321.56	1220.5	1150.11	919.115	1065.23	846.519	939.382	907.335	751.798	908.293	861.435	906.666	1058.95	969.271	837.289	1072.53	877.068	994.295	848.499	760.864	1138.61	1117.14	856.533	951.35	1021.36	985.579	976.474	871.248	890.042	950.761	984.448	1015.05	1296.85	822.201	1089.56	962.888	1031.77	958.527	1010.75	1085.63	1043.26	855.635	846.429	949.907	1012.18	902.11	1011.61	925.5
pos_3376	Steganacin	514.498	403.134	725.04	428.809	372.358	373.611	265.86	488.246	389.72	406.254	340.666	448.959	680.888	429.194	446.445	662.391	446.771	433.338	365.021	302.181	465.253	512.637	352.397	451.181	448.21	490.124	424.316	801.364	495.751	466.68	490.648	585.329	883.094	2866.71	985.287	1304.63	741.026	569.352	628.338	726.728	972.548	564.278	757.758	1429.42	1071.33	791.469	2073.19	747.897
pos_3379	Urdamycinone F	751.527	956.382	776.471	761.868	778.625	728.098	820.688	860.729	717.729	781.378	774.432	771.581	748.07	645.514	716.815	673.738	721.591	608.039	731.197	858.087	670.828	635.896	735.186	758.458	822.081	773.525	815.386	707.361	709.753	652.803	474.217	437.92	492.123	416.394	418.545	426.881	675.898	619.385	585.42	515.418	530.627	591.199	607.883	455.733	568.379	577.824	420.881	470.035
pos_3383	Dukunolide A	451.558	256.046	192.031	255.681	659.405	278.519	857.369	136.743	622.39	261.864	110.378	187.261	190.202	328.763	314.376	290.974	227.817	211.257	74.2587	223.022	152.354	241.744	224.835	47.9973	236.097	210.424	194.137	165.738	75.2062	57.033	307.824	254.864	454.529	246.682	267.337	368.639	311.192	283.682	343.638	272.177	174.871	204.463	198.952	213.49	92.1906	115.415	272.805	217.09
pos_3384	Thymidine	402.518	218.489	259.458	170.791	212.047	187.368	311.809	198.159	241.379	178.195	144.031	199.591	236.833	256.786	144.283	211.549	194.362	192.676	182.563	202.241	250.694	241.678	211.924	112.875	255.8	189.083	226.629	237.686	216.349	122.278	270.431	203.653	373.469	325.523	238.234	359.46	241.245	291.501	280.774	267.429	220.598	158.569	181.294	225.461	148.159	174.296	257.013	261.989
pos_3385	alpha-1,5-L-Arabinobiose	752.887	900.036	868.246	866.217	873.587	826.823	705.631	699.815	1041.98	750.342	911.391	858.049	821.665	718.191	653.752	911.916	785.663	895.729	646.206	690.508	764.783	672.998	752.906	670.948	776.408	837.293	660.67	708.914	593.928	589.343	488.976	482.306	582.125	563.377	560.997	638.043	463.821	471.028	452.656	506.581	536.021	585.22	707.115	466.313	459.686	480.663	423.813	673.91
pos_3386	N-Acetylneuraminate	1241.25	2397.11	3098.89	2900.48	1640.91	1680.21	1415.99	1990.47	1711.75	1920.22	2103.07	1667.13	2001.7	1863	3537.86	2133.15	2074.46	2227.95	3062.99	2284	2217.31	2286.49	2853.93	3274.86	2303.78	2440.46	2429.86	2243.82	2346.47	3135.97	845.334	959.429	936.154	1256.45	1052.49	1503.27	991.112	842.095	975.128	1109.37	1412.17	1459.02	2046.07	1310.75	1638.66	2066.56	1491.25	2426.07
pos_3387	8-C-Glucosylnaringenin	3468.44	3812.52	2492.34	3090.44	4223.21	3516.65	4672.11	3344.57	3560.48	3760.62	3327.46	3074.53	2612.28	2929	3638.17	2583.53	3279.53	2517	3551.63	4133.24	2478.49	2655.12	3697.13	3273.66	3443	3174.21	3495.85	2830.15	2962.88	2554.53	1434.7	1335.83	1146.35	1237.49	1263.09	1679.67	1114.03	1306.1	1104.55	1013.08	1829.98	2108.11	2232.59	1112.91	2061.12	2233.43	1090.97	2063.12
pos_3389	2,3,4,5,2',6'-Hexamethoxy-3',4'-methylenedioxychalcone	3404.54	2764.77	2079.97	2495.6	3879.89	2522.35	4622.81	1635.08	2824.49	2821.83	2210.32	1979.23	1720.64	2484.88	2426.46	2045.6	2009.67	2137.38	2469.75	2879.18	1803.21	2182.93	2824.32	1986.93	2162.34	2000.71	2113.06	2006.54	1802.66	1537.09	1808.89	1699.31	2190.63	1901.53	1801.85	2967.31	1063.11	1538.09	1508.02	1298.61	1914.39	2102.52	1960.44	1183.97	1187.99	1505.45	1313.84	2071.34
pos_3391	2,4,5,6-Phenanthrenetetrol	8983	11745.1	9742.15	7962.68	5295.55	8183.33	10633.5	11306.6	7166.17	10253.6	15294.9	14198.9	7757.25	3955.42	5098.64	6801.95	7153.68	3843.78	11243.4	8855.01	5480	4547.36	7419.61	9613.09	6672.23	7291.51	4244.67	9497.05	9399.05	6448.62	41216.8	25566.6	26910.9	19070	34388.7	5427.05	35381.5	33159.8	39275.3	33662.1	11729.9	14559.3	13602.1	23173.5	12332.7	8953.29	19913.2	6096.06
pos_3393	dTDP-4-amino-4,6-dideoxy-D-glucose	471.73	671.58	783.222	592.316	509.443	507.005	480.585	499.041	643.196	433.342	533.909	828.199	576.718	483.617	508.386	626.514	445.95	488.521	446.712	478.047	383.635	336.849	379.893	492.452	427.819	452.889	400.926	432.884	355.722	413.995	553.104	501.621	522.63	344.697	661.543	359.208	526.043	460.401	449.643	520.244	282.348	283.392	420.837	380.992	324.208	305.227	384.727	335.148
pos_3394	Vitexin -4''-O-glucoside	3182.38	6935.11	6539.9	6733.72	7136.44	7050.61	5160.51	5064.1	8305.39	5804.76	6956.02	7179.22	6209.94	4641.28	4346.38	5854.76	5839.08	6055.09	4455.06	5298.46	3515.94	3561.8	4578.85	4660.88	4140.4	4430.32	3693.46	4629.2	3067.33	3158.19	1640.28	1727.9	2094.72	2454.22	1955.43	2594.6	1646.13	1311.81	1391.28	1462.18	2831.4	3135.2	3984.21	1336.65	2122.63	1980.57	1128.39	2849.22
pos_3398	Mahaleboside	12093.8	7243.68	7848.04	8044.32	8656.7	8906.05	6470.46	10283.7	4702.25	9598.59	7384.99	8687.45	9409.97	9751.28	5990.93	8815.59	8518.38	8370.75	8340.21	6918.09	15084.5	15610.8	9123.45	7892.76	11892.3	11976.5	12746.8	10930.4	10882.8	11331.8	11186.8	10764	7788.34	8342.12	10231.5	8491.63	9979.7	10131.2	10645.3	9849.21	8139.29	7737.91	7013.31	8862.56	7427.38	7876.88	8907.48	8651.74
pos_3403	Tropone	429.983	560.74	669.681	603.167	379.894	426.803	268.575	586.058	390.584	450.426	404.318	473.285	545.071	475.394	653.557	462.075	506.172	445.81	595.611	453.116	603.951	638.051	521.622	561.375	588.73	615.302	629.198	680.298	625.894	685.326	362.344	353.437	311.403	469.268	352.71	395.025	379.776	353.637	405.64	385.935	420.083	384.314	478.807	439.993	531.953	519.19	484.081	531.976
pos_3409	10-Formyltetrahydrofolate	1209.26	1076.83	1106.18	922.134	915.625	797.407	1083.35	840.997	857.885	871.565	894.796	849.61	872.017	829.057	1008.91	892.583	766.638	772.058	957.738	983.71	932.107	1010.11	1023.1	1059.96	886.051	880.63	938.97	971.52	873.687	955.184	667.581	655.772	907.625	756.301	749.047	872.681	582.279	618.034	634.791	587.394	735.922	701.966	702.42	564.776	675.427	657.543	602.914	729.847
pos_3411	2-Hydroxyphenylacetate	800.206	1213.08	1502.39	1267.78	677.816	765.892	475.95	1193.81	708.713	906.969	788.623	908.994	1194.7	958.162	1384.26	964.888	1001.71	863.323	1253.58	926.278	1188.53	1258.34	1068.72	1117.7	1243.7	1295.33	1257.83	1469.8	1237.38	1379.01	729.264	719.528	705.508	1051.58	782.734	814.03	794.39	731.598	785.602	750.322	831.294	736.037	1029.65	945.963	1057.8	1040.93	1081.5	1081.01
pos_3412	Umbelliferone	3920.85	7191.28	8653.36	7543.2	4119.21	4417.75	3310.47	6637.67	5004.48	5177.7	4425.73	4986.97	6361.7	5285.64	8634.66	5219.44	5711.03	4761.14	7333.27	5536.84	5843.07	6158.03	6022.73	6543.32	6446.37	6804.17	6719.02	7914.14	6766.04	7394.61	3013.6	3084.09	2718.55	4954.18	3058.45	3980.64	3604.28	3078.45	3509.4	3488.69	4411.39	4008.21	5891.92	4646.84	5885.66	5928.52	5162.12	6028.55
pos_3414	5-Hydroxyconiferaldehyde	56517.6	72189.8	100737	74549.7	45850.6	50139	35774.9	70751.9	59445.1	57938.2	49318.2	58997.1	75565.3	57208.3	87496	66268.4	62506.4	59174	72108.1	57962	72006.8	67479.8	62960.9	74263.8	68578.9	72878.9	64339.4	92413.4	82551.8	82855.9	37037.9	38888.5	56497.1	82840.2	50125.3	71096	55912.9	58914.9	57489.9	59983.6	65434.1	53040.1	70552.1	81518.3	79072.4	72884.5	92521.8	74374.4
pos_3415	Remerin	2745.81	6178.16	6352.43	5970.24	3788.27	3400.4	3568.16	4994.71	4677.54	3934	3276.91	3524.63	4647.46	4012.8	6937.83	3710.45	4289.57	3654.66	5741.79	4533.91	3130.55	3486.78	4485.01	5135.16	4474.55	4589.14	4479.42	5405.84	4826.83	5372.21	1437.68	1542.95	1225.13	2931.82	1205.51	2625.06	1815.44	1346.77	1718.35	1865.69	2991.31	2939.6	4453.11	2592.58	4289.72	4386.03	2955.66	4653.21
pos_3417	Derriflavanone	1671.24	1659.31	1773.66	1471.27	993.686	1062.05	977.165	1597.62	1141.4	1237.94	1360.43	1091.2	1848.28	1753.38	1069.77	1572.79	1448.53	1635.63	1525.16	1436.47	2136.86	1812.62	1460.74	1861.46	1844.96	1679.17	1613.71	1484.03	1306.35	1920.98	931.835	854.051	893.113	1039.56	968.617	1045.82	1034.71	1017.78	769.845	1281.43	1254.9	1349.8	1439.95	1096.17	2019.23	1444.95	1210.43	1561.33
pos_3418	alpha-L-Rhamnopyranosyl-(1->2)-beta-D-galactopyranosyl-(1->2)-beta-D-glucuronopyranoside	2056.42	2715.43	3016.28	2574.21	2092.54	1965.48	1960.55	2237.2	2301.34	1960.73	1729.74	2213.63	2504.59	2165.04	2738.78	2302.86	2080.59	2057.86	2507.64	2104.22	2376.02	2214.49	2080.16	2323.43	2461.09	2350.45	2319.43	2740.03	2360.94	2616.39	2694.53	2612.03	2950.32	2962.63	3013.85	2759.25	2940.03	2940.5	3082.24	2769.59	2597.98	2178.14	2895.22	3315.63	2912.25	2844.41	3473.15	3044.67
pos_3420	2,3-Dehydro-UWM6	1317.13	3426.97	9481.32	4923.44	1325.67	1310.58	1167.14	1874.25	938.622	1695.11	1301.94	2402.41	3077.7	1628.77	4507.13	2523.52	1601.2	1694.91	2781.52	1871.8	1867.66	1910.27	2466.1	3388.7	1978.58	2242.86	1837.82	5155.05	3911.3	3640.15	514.773	525.34	680.568	752.662	656.283	980.059	654.202	602.371	581.878	644.67	1332.62	1004.33	1636.9	728.31	1773.24	1747.2	926.805	1836.06
pos_3430	6'-Oxogentamicin X2	6929.76	6454.66	6548.05	5765.37	5669.51	5389.48	6348.79	5678.9	7709.7	5779.56	5830.1	5590.67	6415.18	6323.42	4764.79	6290.93	5728.32	6093.2	5688.9	5532.23	6791.72	6176.75	6034.11	6508.66	6495.01	5737.67	6199	6056.88	5947.57	6686.82	8479.6	6466.98	12000.5	6224.77	9339.97	6532.45	8943.71	9634.75	9845.92	8813.22	5992.31	5692.72	5681.99	8296.75	6439.24	5689.13	9552.39	5848.61
pos_3431	Isoswertisin 2''-rhamnoside	5292.63	4298.99	3775.46	4708.77	3820.51	4009.95	2458.99	4086.87	1972.16	4874.36	3989.96	3487.4	3958.89	4188.54	3036.15	4206.24	3785.06	4056.85	3301.77	3760.03	6345.61	6205.68	4925.48	3617.36	4957.1	4550.04	4946.45	2827.55	3749.77	3895.06	1189.05	1265.23	1096.87	1362.73	1173.6	1722.59	1456.08	1238.89	1301	1468.97	1866.16	1916.04	2074.1	1263.34	1885.16	1934.1	1295.51	2365.93
pos_3434	beta-Citryl-L-glutamate	872.352	1705.68	1676.2	1769.37	1351.31	1383.97	1598.85	1746.64	1872.18	1395.04	1133.42	1363.09	1607.47	1398.25	2296.24	1331.96	1574.66	1322.03	1866.8	1676.13	1105.39	1254.55	1552.41	1570.56	1355.05	1533	1473.33	1700.29	1633.7	1653.71	572.736	631.864	496.61	1313	516.558	1150.51	727.059	573.466	715.19	720.38	1296	1230.73	1543.24	1182.1	1451.07	1635.64	1212.44	1677.23
pos_3445	Grosvenorine	8599.21	9536.04	9775.96	8318.01	5875.42	6708.64	5485.85	6812.85	5258.89	10714.6	9326.62	9355.81	7626.8	6876.24	5812.1	7319.36	7281.67	6480.41	8481.93	7428.54	8072.89	6924.87	6732.86	8126.81	11600.2	19066.5	8386.89	8745	21330.5	7615.71	8268.69	8697.62	7827.92	7328.93	9605.8	8211.76	8582.38	10493.7	10982.1	7353.37	6678.1	6346.89	7195.23	7025.01	7284.09	7336.49	7267.85	8081.9
pos_3448	DIHYDRO-OBLIQUIN	2458.49	2626.06	2670.91	2343.06	2317.07	1854.08	3144.74	2049.37	2945.11	2000.25	2197.05	1930.03	2300.54	2301.93	1883.39	2298.38	1905.45	2202.19	2176.88	2221.7	2024.19	1957.77	2277.6	2469.58	2382	2088	1937.56	2274.68	2084.95	2557.28	1604.1	1431.94	2040.48	1490.23	2088.76	1608.12	1726.35	1579.35	1461.05	1715.37	1378.46	1371.02	1615.27	1599.47	1659.1	1486.09	1645.1	1461.8
pos_3449	cis-3,4-Phenanthrenedihydrodiol-4-carboxylate	845.537	1086.28	998.304	1150.53	833.085	862.703	779.238	936.142	1227.84	906.329	998.51	839.789	935.894	961.026	754.333	950.451	953.234	1041.24	884.521	928.367	943.495	973.487	958.205	939.476	1023.65	986.086	1137.53	1060.65	979.938	1014.51	781.587	889.206	1197.99	1474.86	960.041	2169.92	988.853	1159.06	1207.81	1264.21	1872.07	2066.79	2483.95	1319.77	2007.8	2124.02	1485.89	2787.24
pos_3450	Italipyrone	14212.5	9487.33	6083.73	8553	18278.2	7692.2	17058.3	8839.02	14440.8	12270.6	4113.4	3834.94	5377.59	10154.1	4223.1	7533.02	5630.06	7248.65	6606.12	10912.7	5925.47	5741.27	11018.4	6178.93	5824.09	4129.28	4788.17	4791.92	3805.04	4930.54	2936.87	2602.16	3621.35	2414.62	2851.79	3298.2	2284.96	2555.5	1883.4	2321.25	2934.14	2949.14	2771.8	2111.54	2860.75	2845.89	2316.49	3055.95
pos_3451	Acarbose	3039.51	2786.98	2224.37	3074.77	2530.45	2514.59	2756.98	1630.07	2551.94	2506.58	2287.79	1765.72	1743.81	2429.94	2752.29	2055.15	2097.11	2492.44	1918.36	2390.26	1759.12	2140.43	2643.08	1862.56	2157.16	1812.98	2425.35	2379.24	2133.01	1875.28	1453.66	1472.81	1631.14	1697.66	1299.61	2602.44	1652.56	1778.59	1971.81	1876.46	2057.56	2334.94	1901.94	1392.6	1386.48	1848.76	1623.73	2270.38
pos_3455	Leukotriene A4	2429.72	2726.4	2959.68	2668.92	2502.58	2226.73	3120.52	2435.49	2926.18	2269.91	2216.04	2258.89	2646.88	2604.35	2323.91	2393.93	2348.85	2316.78	2558.25	2490	2809.28	2739.01	2587.85	2556.51	2723.39	2666.89	2729.42	2934.73	2783.23	2985.77	2818.97	2561	2662.8	2285.76	2793.9	2397.66	2573.5	2591.95	2451.81	2780.09	3178.98	2827.16	2402.5	2571.39	2538.3	2570.32	2704.81	2768.89
pos_3457	124-1	2267.5	2525.39	2869.64	2470.9	1921	1485.32	2139.62	1647.35	1591.44	1557.19	2123.7	1815.54	2116.81	1899.67	1583.58	1923.48	1551.3	2084.43	2084.24	1807.38	2166.39	1923.18	2005.75	2348.44	2079.95	1853.44	1806.99	1984.95	1795.06	2580.79	1858.11	1810.09	2377.93	1700	2258.99	1498.07	2107.36	2329.52	2058.11	1889.25	1492.99	1198.96	1518.29	1759.51	1373.43	1228.98	1679.83	1331.81
pos_3458	Rhapontigenin	1340.39	1051.7	998.35	1042.87	1207.61	1260.11	1207.93	819.288	1419.86	1005.08	1193.95	927.886	978.994	1311.14	720.646	1111.23	1126.57	1331.79	822.487	927.44	860.523	998.836	979.229	878.89	1125.72	895.317	1095.7	995.606	906.621	914.722	2149.11	2001.5	2056.99	2169.11	2436.64	2521.23	2503.84	2868.03	2861.26	2430.73	1628.97	1617.04	1346.4	2300.36	1156.5	1223.21	2429.04	1568.91
pos_3459	Ovalitenin B	1420.91	1556.3	1561.35	1444.13	1311.82	1250.54	1320.63	1357.57	1297.05	1452.65	1346.36	1287.64	1442.55	1443.7	1142.41	1392.13	1301.79	1360.15	1298.27	1229.18	1373.79	1340.81	1300.19	1445.91	1666.55	1584.17	1415.44	1413.06	1473.91	1537	1290.49	1142	1297.99	1108.74	1287.73	1577.13	1393.27	1474.38	1517.99	1491.97	1247.54	1137.61	1239.79	1313.29	1210.19	1201.3	1336.63	1257.14
pos_3460	2,3-Dihydro-4-(4-methoxyphenyl)-1H-phenalene-1,2,3-triol	2366.89	2663.12	2886.39	2601.33	2153.88	2074.83	2181.06	2660.12	2351.5	2144.53	2246.77	2469.41	2704.33	2585.32	2234.4	2355.38	2401.54	2243.5	2530.4	2373.78	2926.9	2793.93	2500.04	2611.63	2802.18	2809.65	2752.86	2975.56	2767.93	3137.64	3255.85	2816.33	2959.55	2404.02	3241.02	2285.01	2929	2834.89	2720.2	3235.23	3346.93	2881.38	2415.6	2915.88	2833.33	2777.54	2992.4	2863.54
pos_3461	7-Deoxyloganate	1487.06	1654.97	1923.69	1635.72	1394.29	1398.95	1265.49	1810.67	1425.64	1410.69	1480.03	1708.38	1850.83	1731.36	1518.22	1596.64	1665.38	1514.41	1744.35	1574.76	2072.76	2028.4	1675.85	1760.13	1926.81	1943.78	1976.09	2166.15	2053.59	2135.89	2624.84	2360.81	2053.95	1912.89	2522.14	1755.19	2399.09	2283.18	2222.69	2497.76	2647.55	2252.15	2077.19	2394.08	2181.39	2149.19	2414.83	2388.48
pos_3464	9-O-Methylglyceofuran	3942.45	3353.65	2978.22	3004.06	5806.51	2560.72	9199.41	2442.76	4365.91	3329.76	2333.77	2113.64	2590.78	3374.43	2244.07	3016.6	2251.58	2765.38	2743.39	3289.09	2382.55	2249.75	2957.08	2763.19	2616.98	2120.48	2237.56	2464.1	2094.19	2614.5	1786.13	1717.18	2304.3	1790.23	2171.03	2380.01	1533.07	1531.16	1541.91	1663.54	1573.7	1610.76	1573.15	1585.1	1552.5	1485.33	1810.99	1658.25
pos_3466	Stachyose	16624.4	17347.8	19745.3	17210.9	14074.9	13743.2	13544.9	16253.2	13905.7	14353.9	16171.1	16842.4	17336.5	15928.3	15802.9	15678.7	15314.8	15535.5	17274.1	16064.9	20674.8	19318.4	17405.8	18657.8	18240.6	18161.8	18122.9	19504.6	18549.2	20742.2	18700.4	17342.7	18207.8	15853.4	18484.1	15051.1	18460.8	19147.8	18216	20011.4	21331.8	19009.1	16253.7	18605.8	18918.3	18471	19094.3	18828.2
pos_3471	Phlorizin chalcone	2797.96	3609.18	2486.72	2924.95	3691.87	3260.43	3537.75	3503.17	3811.1	3583.31	2776.14	2812.1	2403.54	2581.94	2662.22	2311.16	2807.21	2193.86	2543.47	3174.69	2295.97	2402.44	2610.27	2555.25	2882.61	2736.9	3189.33	2199.83	2435.94	2235.58	1987.23	2251.37	1468.47	1488.34	1719.87	1691.4	2111.66	1974.89	1780.21	1808.3	2079.28	2050.93	2327.7	1853	2634.82	2572.59	1568.46	2212.69
pos_3474	Sesamoside	2255.58	2203.99	2324.7	1989.93	1455.74	1560.41	1530.55	1881.22	1746.26	1780.07	2107.5	1742.68	2002.99	2012.29	1359.29	1902.04	1709.9	1790.19	1835.45	1868.19	2141.6	1916.25	1931.99	2080.17	2281.6	1814.91	1921.48	1840.65	1886	2239.96	1791.95	1790.03	1485.38	1551.19	1843.96	1363.43	1983.24	2064.04	2058.49	1800.21	1515.41	1504.86	1815.51	1603.18	2200.08	1821.58	1508.94	1664.54
pos_3476	Luteone 7-glucoside	6511.41	6477.5	7014.83	6141.12	7510.59	5516.84	8673.01	5155.58	7277.9	5477.11	4904.11	5868.28	6335.54	6294.87	6466.99	6013.78	4913.84	5638.69	5078.3	5289.68	5344.71	5145.64	5633.93	4841.36	5783.64	5139.52	5312.03	6033.2	5712.2	5562.84	8941.94	8053.23	9546.75	9327.52	9348.11	10004.6	10449.3	10199.4	10806.7	9939.46	8658.18	7949.8	10685.7	9500.79	7651.44	8637.31	10544.1	10536.3
pos_3477	alpha-1,5-L-Arabinotetraose	4754.22	4246.09	4151.71	3730.28	4106.35	3643.59	4874.75	3699.25	3859.74	4165.82	4634.48	3947.18	3917.18	4120.14	3168.39	3857.59	3852.08	3926.82	3943.21	3805.84	4165.96	3760.06	3998.22	4223.92	4406.36	3620.54	3678.26	3586.05	3741.84	4121.99	3333.46	3226.67	3746.6	3135.21	3319.28	3614.26	3640.25	3856.59	3683.48	3331.93	3315.63	3282.61	4052.36	3061.62	3424.21	3293.78	3155.39	3262.7
pos_3483	(+)-Piresil-4-O-beta-D-glucopyraside	1480.24	1739.5	1725.28	1602.7	1219.16	1186.74	1360.82	1092.11	1552.72	1141.24	1528.16	1290.72	1370.97	1324.67	1171.15	1388.56	1154.6	1409.57	1311.79	1281.3	1248.49	1149.34	1388.76	1643.7	1312.92	1166.94	1243.06	1565.62	1315.11	1393.85	1637.12	1412.12	2830.81	2025.11	1948.03	1772.05	1510.81	1512.99	1606.4	1466.21	950.942	980.614	941.294	1316.25	1067.4	860.656	1864.41	954.795
pos_3484	3-Oxo-OPC6-CoA	892.278	977.64	982.671	926.625	878.527	686.695	928.645	684.616	716.5	674.265	670.302	666.155	686.531	672.429	748.156	692.911	623.807	629.663	781.934	725.088	793.859	690.188	733.809	785.82	727.288	690.146	757.707	809.615	695.7	734.333	554.511	620.53	938.485	620.212	703.446	689.223	813.339	807.712	773.197	710.565	842.166	826.463	856.165	789.86	889.264	851.771	771.937	794.483
pos_3486	3,7,4'-Tri-O-methylquercetin	2523.99	2571.8	2922.72	2548.81	2416.82	1650.93	5285.81	1760.07	4988.97	1781.91	1796.79	1888.36	1807.75	1991.31	1890.65	1825.92	1671.08	1674.37	1705.02	2031.25	1965.98	2063.66	1907.77	1842.46	2045.17	1795.64	2066.15	2276.88	2211.88	2043.53	1594.19	1530.45	1518.95	1660.17	1600.48	1869.09	1812.84	1690.25	1604.51	1520.74	2164.36	2023.85	1990.18	1545.38	2582.12	2429.45	1735.74	2468.75
pos_3491	Strictosamide	3265.76	2206.76	1505.47	1804.91	5387.02	1938.22	5809.79	1074.87	2062.97	2027.51	1414.79	1578.03	1382.8	2303.58	1780.76	1912.05	1555.41	2115.28	1760.14	1727.08	1394.62	1528.53	1773.1	1497.73	1645.53	1217.64	1406.75	1309.74	1218.94	1090.05	1486.26	1426.56	2329.13	1606.11	1418.25	2169.88	1012.79	1358.89	1170.52	910.702	1472.69	1741.63	1476.36	984.535	1174.4	1085.6	1103.85	1381.49
pos_3492	Galactopinitol A	3160.23	2132.53	1726.49	1807.02	4576.41	1505.04	18770.7	1052.91	17982.8	2197.4	1376.72	1853.77	1484.03	1913.06	1473.57	1989.37	1283.19	1588.92	1355.44	2114.15	925.026	1014.71	1401.5	1482.47	1251.42	1083.8	1123.59	1921.25	1270.86	1172.91	1074.22	1008.84	2986.43	2034.25	1428.72	2542.11	1359.53	1057.98	1270.05	902.511	1248.24	1389.33	1188.03	922.891	973.196	938.303	1636.61	1242.06
pos_3496	5-Amino-6-(1-D-ribitylamino)uracil	1418.96	1478.3	1511.01	1462.97	1151.63	1263.69	1080.43	1392.33	1121.75	1275.78	1304.06	1251.66	1449.44	1560.36	1187.02	1375.36	1312.02	1324.57	1309.87	1266.84	1454.79	1491.05	1315.41	1343.99	1619.2	1487.61	1624.86	1475.08	1422.53	1503.5	1392.93	1318.67	955.239	1338.03	1267	1417.62	1484.41	1241.08	1332.33	1413.89	1423.46	1364.83	1634.32	1365.29	1745.17	1739.15	1604.89	1962.28
pos_3501	3-Dehydroshikimate	9021.77	4530.11	5509.51	4072.24	7151.17	5935.26	2722.42	8976.97	2245.79	6570.71	6628.08	5500.63	9762.96	10358	4736.91	8149.96	8544.55	8441.35	7226.31	7292.55	13279.7	11211.9	7972.2	8418.95	11797.9	10444.8	8927.08	6220.64	5567.75	9783.73	5948.66	5267.45	2488.24	3291.16	5020.69	2940.3	3012.63	3069.5	1813.4	6978.52	2502.05	3126.67	3653	4525.49	5381.33	3001.81	4160.64	3812.46
pos_3502	4-Coumaroylshikimate	2298.54	1446.8	1576.02	1306.34	1913.96	1567.42	1228.69	2114.48	914.27	1670.14	1658.86	1467.96	2332.36	2457.81	1266.23	2001.31	2019.15	2116.74	1818.8	1846.2	2936.73	2472.32	1969.39	2137.09	2748.77	2371.23	2103.45	1589.69	1513.75	2417.47	1474.76	1283.05	912.228	999.695	1311.9	932.299	960.454	922.468	671.584	1698.56	846.538	927.893	1103.53	1087.93	1357.39	885.32	1127.93	1031.93
pos_3518	MM 42842	2313.07	1154.14	1137.23	1086.11	1757.48	1260.05	1343.61	1779.94	737.78	1480.57	1287.43	1161.17	1967.12	2123.53	1087.81	1750.94	1708.06	1998.81	1347.28	1469.38	3357.49	2679.02	1707.16	1797.04	2441.95	2258.6	1904.72	1070.13	1079.73	2076.7	940.322	877.868	606.014	553.647	851.639	758.536	489.081	529.071	543.755	1285.31	465.901	568.207	777.331	688.288	919.191	591.93	638.453	773.297
pos_3520	1,1,1,1-Kestohexose	2452.61	2499.92	1720.43	2815.39	2965.36	3044.4	3461.22	1261.8	2864.73	1875.76	2678.35	1651.24	990.258	1696.31	2144.12	1307.87	1539.86	1865.11	1485.1	2315.19	1179.58	1532.28	2489.64	1451.08	1411.5	1195.44	2110.46	2023.91	1692.82	1096.16	1770.83	1744.2	1454.64	1818.61	1571.86	2819.31	2179.28	2125.63	2573.19	1952.79	2702.86	3273.11	2376.48	1595.44	1299.3	1996.22	1705.71	2533.68
pos_3521	C1'-C9-Glycosylated UWM6	1511.02	589.704	714.524	584.184	999.29	836.743	506.792	1198.52	390.248	1015.19	901.3	792.727	1233.85	1303.16	673.237	1230.19	1206.73	1409.07	837.348	991.447	2642.26	2014.49	1178.36	1274.4	1731.43	1638.38	1378.26	703.471	742.86	1480.82	614.68	601.589	354.28	377.53	570.29	424.499	317.204	365.868	288.935	961.897	293.866	389.301	460.265	478.451	670.157	352.373	420.09	462.219
pos_3523	Kanzonol A	4866.88	4684.58	4743	4559.76	6797.47	3990.89	15701.4	3309.96	15389.5	3869.3	4471.63	4314.25	3632.49	4006.53	3585.63	3988.72	3460.71	3688.34	3848.54	6967.89	3002.32	2949.41	5801.2	3853.04	3350.01	3224.82	2894.3	3862.49	3691.33	3231.87	3449.52	2781.99	8099.09	5585.04	3890.16	5548.25	4324.39	4350.1	3771	3588.36	5699.96	5692.74	4325.5	4180.43	4324.67	4813.69	5202.41	4995.78
pos_3525	Epimedin B	2209.59	2050.56	2051.85	1993.06	2141.2	1513.39	2480.21	1416.46	1542.94	1540.69	1848.08	1643.2	1645.96	1966.54	1657.38	1677.52	1284.87	1664.4	1698.61	1662.85	1850.47	1821.42	1698.22	1950.16	1894.65	1637.5	1673.7	1628.77	1603.85	1833.82	969.541	892.063	999.932	1171.75	998.848	1446.4	1123.1	1077.52	1004.52	1137.35	1267.54	1408.27	1462.26	1037.98	1861.19	1406.92	1123.19	1529.69
pos_3527	Flucytosine	375.112	350.604	338.354	375.565	362.867	392.377	509.35	388.852	460.23	375.671	320.126	395.19	370.704	424.9	410.997	373.446	347.586	368.43	360.874	372.992	323.188	331.695	333.617	348.44	385.389	332.653	392.95	359.427	374.672	382.387	405.757	363.419	361.867	364.773	394.439	412.875	413.624	349.416	375.13	389.25	421.391	446.463	421.674	363.722	360.575	400.26	391.625	452.736
pos_3537	DIMETHYLCAFFEIC ACID	6950.59	5574.98	4513.5	5045.08	7078.27	5242.36	8566.25	3853.49	5985.3	5400.58	4254.78	3809.05	3865.96	5092.14	5211.06	4588.45	4411.54	4900.43	4953.77	5412.18	3939.79	4448.21	5587.75	4484.96	4476.99	3854.52	4499.17	4137.72	4111.59	4035.2	4025.33	3794.93	4857.9	3569.69	3873.28	4747.23	3028.16	3661.3	3667.91	3220.57	3951.08	4528.6	3590.31	3028.01	2894.9	3284.7	3307.59	4116.47
pos_3539	Landomycin H	10023.3	7542.11	5471.12	6837.89	11771.3	7681.86	13856.5	4301.12	8751.13	8061.36	4490.35	4183.81	4158.56	7230.52	7606.01	5578.46	5576.28	6505.21	7539	8243.02	4881.27	6069.93	8488.84	5815.12	5558	4774.2	5849.85	4959.6	4833.52	4509.61	4791.63	4569.07	6306.07	4739.76	4276.5	6630.58	3038.36	4493.58	4435.74	3697.7	5695.31	6548.59	3992.1	2820.27	2729.51	3223.27	3328.04	4548.57
pos_3540	Naringenin 7-(2-p-Coumaroylglucoside)	3423.51	8266.5	6749.43	9609.68	8167.84	7963.9	10306.2	9254.2	11331.6	8290.35	12517.4	10335.9	7809.49	8262.84	8598.15	7565.77	10026.5	7878.19	9925.26	10789.9	6337.42	6004.29	9289.5	9800.46	8349.13	8868.78	10602.1	7498.5	6249.88	8303.86	2160.63	2704.96	1568.04	4052.02	2073.64	3589.7	2378.59	1982.77	2371.81	2544.92	6689.92	7253.13	9263.39	2673.92	9720.68	10150.1	2848.9	10665.9
pos_3541	Corilagin	104.679	429.64	352.016	528.629	541.615	641.676	846.71	746.093	920.628	545.444	885.172	801.327	568.015	587.102	606.422	495.089	802.026	526.7	788.163	876.362	366.776	361.642	650.378	645.679	528.432	649.648	741.957	514.45	401.64	514.983	369.61	361.112	162.474	318.255	291.57	262.969	281.181	206.425	301.56	206.791	667.143	620.244	817.062	216.125	798.931	935.247	174.017	912.887
pos_3544	Orotidine 5'-phosphate	20.5752	98.7224	94.3526	149.888	138.67	164.632	218.845	183.927	247.285	146.325	226.655	199.505	136.558	150.967	178.391	133.076	218.156	139.618	201.233	201.884	118.971	119.248	191.909	164.715	148.663	172.045	214.216	143.071	134.613	150.409	35.6165	63.1102	1.21596	111.232	28.3918	84.0856	59.3477	31.7772	51.7644	38.5669	183.466	209.007	226.286	81.4482	230.535	251.517	74.0302	279.578
pos_3549	dTDP-L-olivose	324.682	391.87	69.0881	121.904	796.151	453.561	259.714	158.787	160.03	394.653	368.775	520.602	234.358	219.922	312.538	401.859	129.424	364.615	97.0618	29.0629	406.546	215.261	268.288	132.847	354.558	377.844	222.316	33.0221	224.512	109.399	128.482	316.695	367.135	465.336	176.463	996.563	285.922	247.061	251.256	312.116	394.182	158.912	746.964	598.942	464.332	649.757	640.612	270.851
pos_3550	dTDP-4-amino-2,4-dideoxy-beta-L-xylose	254.307	250.919	56.6303	86.2817	514.745	313.347	246.292	59.3058	111.066	241.574	222.427	327.533	166.637	157.654	221.821	270.481	90.1608	232.568	96.272	55.4756	231.427	124.117	170.229	88.8524	218.32	232.647	137.131	47.0979	196.031	59.9893	88.0853	212.219	308.749	366.831	136.302	636.589	206.896	216.642	215.645	231.719	290.22	144.236	461.994	340.101	309.88	392.071	428.825	171.707
pos_3554	UDP-N-acetylmuramoyl-L-alanyl-gamma-D-glutamyl-L-lysine	928.517	817.971	768.061	690.987	976.698	616.042	1110.77	439.755	653.178	548.945	670.278	846.657	551.539	550.179	698.95	527.76	501.829	555.885	557.246	559.563	536.53	472.168	535.578	582.459	531.088	485.547	485.981	573.116	489.577	483.284	977.317	1061.19	1128.15	625.049	1316.91	673.951	1129.99	1260.56	1597.78	990.642	635.433	650.742	536.676	844.155	373.329	439.753	827.211	387.791
pos_3560	2'-Dehydrokanamycin A	327.344	253.38	149.556	161.945	226.096	135.621	340.885	70.3113	156.678	99.358	129.631	100.503	117.345	142.301	160.972	144.848	116.787	139.707	118.307	155.252	98.0619	104.881	143.864	79.3637	76.5555	64.8499	70.1482	158.775	59.4425	59.3221	102.432	83.0019	242.819	126.644	125.255	204.105	86.3667	118.466	104.743	104.164	105.945	123.979	62.8901	86.4109	18.5837	78.6819	128.047	86.601
pos_3561	L-Metanephrine	591.98	706.622	691.353	606.249	577.259	469.009	566.015	523.777	536.687	500.902	599.925	527.068	598.407	565.669	491.276	609.867	503.309	606.653	544.615	522.289	545.707	498.409	517.635	696.917	591.899	544.007	510.6	499.004	539.116	641.46	424.67	401.14	489.721	367.384	461.887	406.636	441.843	437.045	366.86	445.631	359.813	312.108	464.941	400.131	464.616	408.271	376.279	337.862
pos_3562	Thiamine aldehyde	2505.79	2591.34	2412.12	2303.39	2558.49	1983.71	3523.87	1608.72	2613.81	1944.88	2083.56	1877.05	1979.7	2225.82	1928.49	2086.35	1724.87	2068.81	2201.19	2208.01	1826.84	1772.13	2199.52	2320.74	2120.8	1841.58	1838.86	1820.5	1694.18	2082.18	1616.1	1408.79	2227.32	1519.19	1606.47	1745.32	1606.03	1632.89	1716.74	1634.46	1448.07	1571.7	1447.32	1337.18	1385.77	1287.4	1438.7	1310.24
pos_3563	Ser Thr Asp Met	850.784	1039.86	941.474	1006.77	764.381	676.914	829.871	526.844	753.787	702.113	696.975	662.704	637.697	768.758	680.33	683.325	633.294	685.59	747.635	794.438	553.574	593.392	812.843	818.048	725.988	588.442	676.906	604.082	634.51	635.771	458.234	352.796	617.832	499.257	457.905	651.927	402.018	425.809	447.303	433.191	481.84	562.916	497.935	329.997	342.928	420.847	390.425	540.576
pos_3564	7-Methylguanosine	3168.82	2461.37	2226.21	2359.15	3497.32	2904	4514.62	2214.56	3324.6	2907.42	1900.72	1868.43	2165.11	2855.63	2764.45	2332.45	2486.83	2692	2775.64	2988.7	2262.91	2527.88	2943.64	2358.78	2218.97	2105.13	2293.85	2281.6	2140.02	2091.59	3139.97	2972.44	4475.79	3220.07	2645.65	3744.81	2510.77	3408.78	3425.56	2585.63	3441.33	3557.17	2403.63	2497.92	1761	2089.03	2819.83	2390.4
pos_3566	Delphinidin 3-O-(6''-O-malonyl)-beta-glucoside-3'-O-beta-glucoside	272.284	170.644	196.924	192.873	288.07	245.619	315.562	204.229	286.762	251.539	192.344	214.575	207.035	187.284	244.036	195.213	242.463	201.754	190.871	238.321	201.139	252.404	208.456	144.952	224.203	288.237	216.351	229.184	249.995	152.004	335.411	364.43	373.456	280.734	329.626	308.171	275.406	354.043	392.897	301.115	287.929	289.981	259.689	291.528	236.003	280.758	293.381	263.246
pos_3569	Quinone	148.93	137.629	115.168	140.447	128.057	150.404	124.589	144.382	133.995	150.711	153.834	137.011	141.759	170.812	101.595	128.763	154.741	138.254	124.845	129.136	135.15	154.838	146.96	110.797	175.447	149.543	177.269	159.539	148.825	128.912	164.162	162.981	132.04	131.543	148.063	166.863	154.095	149.378	154.284	136.097	159.089	159.266	178.09	152.93	154.527	164.192	137.18	167.357
pos_3572	Coumarin	52745.1	49646.4	46792.8	56095.7	54655.9	59926.1	46134.6	60002.3	55751.4	60660	59640.9	55362.4	56580.3	61639.2	46889.1	56102.8	63450.1	57606.7	48581.8	52989.4	60197.5	64172.6	58820.1	46500.6	63490.5	60106.2	70585.9	62035.4	56620.8	54508.7	60493.7	61472.4	48357.1	54442.2	57253.3	58410	60399.9	59395.5	58788.1	58047.9	69452.4	67292.2	64487.1	58947	66620.9	72899.7	58695.6	77427.2
pos_3576	7-Methylxanthosine	1669.02	1668.87	1657.77	1566.06	1453.37	1403.76	1465.2	1486.74	1252.85	1420.24	1471.55	1445.6	1622.28	1647.92	1297.64	1565.16	1423.51	1555.98	1472.55	1441.81	1488.99	1442.77	1485.54	1562.73	1724.44	1441.65	1563.01	1528.98	1477.48	1722.69	1444.91	1308.96	1525.22	1393.88	1421.86	1506.77	1486.13	1372.4	1419.52	1410.38	1511.67	1461.25	1572.26	1391.15	1431.17	1519.41	1573.59	1665.55
pos_3579	Austrobailignan 1	5827.03	5992.71	5957.24	5574.76	5434.45	5009.82	5070.18	5143.81	4453.14	4829.59	5351.39	4966.02	5791.87	5953.87	4255.13	5462.65	5126.58	5478.99	5382.33	5143.29	5364.94	5318.08	5357.07	5765.26	6020.49	5135.9	5578.03	5559.45	4939.23	5980.77	4582.6	4322.59	4346.7	4030.31	4559.19	4692.05	4401.99	4126.03	4120.31	4392.43	4796.87	4703.19	4456.2	3980.83	4808.44	4744.91	4264.7	4859.46
pos_3580	5,10-Methenyltetrahydrofolate	1737.66	1327.83	1118.79	1205.41	1376.89	1200.19	1211.94	1374.95	1181.81	1299.65	1422.25	1181.49	1528.81	1636.58	865.351	1389.85	1356.42	1511.63	1277.27	1373.91	1447.42	1354.35	1414.55	1206.69	1722.83	1339.89	1489.19	1203.15	1317.84	1429.45	1766.94	1649.63	1556.81	1617.58	1962.52	1306.13	1827.25	1938.24	2103.7	1762.38	1407.67	1456.72	1406.62	1484.16	1694.62	1415.43	1526.51	1469.87
pos_3584	Epicatechin 3-O-(3-trans-cinnamoyl-beta-D-allopyranoside)	147265	117461	103078	129749	149953	157154	126438	136798	142513	157468	142029	132191	128871	147226	103163	136409	151306	146582	108835	122937	143804	157166	140982	104701	149850	138806	168052	137828	138358	124749	148677	155680	121350	133544	141831	152430	147064	145278	152361	145007	163703	160832	145084	140322	157541	172068	142706	185181
pos_3587	5-Oxopentanoate	45.0788	39.4179	34.9806	40.4683	47.5641	48.8108	37.4263	47.8374	42.1806	43.3208	47.7494	40.8793	48.8475	57.2611	28.1436	39.8235	55.426	52.0889	34.7636	38.3841	48.4474	49.3907	45.628	33.2639	52.4869	47.0741	55.7757	54.5113	51.6698	45.9188	55.0262	40.6437	47.5044	45.0078	49.2075	47.4573	48.4674	43.8317	49.4715	48.6899	55.2056	51.1474	47.8582	41.9844	54.2835	62.0026	48.6991	53.045
pos_3591	5a,11a-Dehydrotetracycline	340.671	612.545	860.117	695.605	258.448	175.288	206.675	295.789	146.392	224.377	269.609	219.559	419.287	347.299	342.299	311.797	178.047	298.927	316.586	245.203	336.782	374.319	309.139	406.639	433.424	378.427	335.023	424.717	465.264	600.313	168.906	138.046	239.346	196.276	205.755	122.933	93.7871	121.193	117.727	95.2572	107.683	94.7643	142.969	134.798	155.244	139.495	133.37	161.705
pos_3592	Chlortetracycline	166.115	177.986	163.133	78.941	119.833	106.081	208.446	147.579	181.746	102.129	93.5542	306.618	141.53	120.826	205.85	63.6745	93.4986	40.9964	178.081	164.119	77.2674	57.1466	71.2822	114.77	88.1893	99.3363	64.444	137.367	141.773	64.8486	869.658	878.574	646.622	395.481	1079.82	170.143	597.346	682.006	864.293	588.617	185.88	292.859	127.894	485.536	133.828	129.293	380.838	107.131
pos_3594	L-N2-(2-Carboxyethyl)arginine	2481.77	2613.19	2810.88	2249.17	2021.25	1729.26	2597.18	2049.99	2210.22	1870.9	2104.89	1908.09	2445.25	2216.53	1999.35	2205.9	1877.12	2006.45	2117	2003.11	2048.36	1801.5	1874.77	2491.9	2451.44	2709.99	1876.54	2166.65	2474.82	2489.03	1702.44	1547.45	2170.45	1898.65	3492.49	2322.81	1813.39	1794.26	2190.01	1793.68	1773.71	1517.71	2261.41	1889.46	2075.44	1820.86	1962.18	1550.94
pos_3596	Verbenalin	3708.81	3806.87	3435.99	3281.85	4091.05	2709.44	5315.11	2594	2958.22	2649.28	3009.21	2702.31	3114.6	3424.66	2412.98	3218.28	2711.84	3101.59	3002.32	2904.38	2662.96	2557.28	3023.79	3272.6	3096.25	2594.44	2721.45	2858.7	2577.96	3210.55	2258.1	1966.45	2788.66	2052.58	2189.18	2644.92	2041.32	2070.99	2000.22	2179.71	2155.39	2365.26	2238.65	1888.85	2157.94	2027.87	2137.16	2278.21
pos_3597	Val-Phe-OH	2049.87	1581.31	1334.91	1264.1	1902.23	1315.47	3115.97	1184.69	1752.92	1284.3	1357.62	1265.87	1277.7	1498.83	1012.87	1481.47	1326.4	1538.96	1369.92	1401.76	1177.38	1177.5	1420.23	1477.39	1185.06	1042.74	1224.33	1171.43	1148.8	1249.73	1348.75	1133.06	2700.28	1481.06	1192.53	1776.26	1326.28	1593.51	1552.58	1463.06	1550.48	1729.28	1364.6	1241.27	1157.85	1122.31	1598.16	1498.37
pos_3598	Azimsulfuron	2625.79	3420.59	3827.79	2880.37	2065.87	2002.09	2011.19	3072.39	1646.64	2391.99	3056.11	2877.13	3366.4	2973.13	2323.27	2925.14	2567.32	2806.58	3242.13	2515.51	3520.73	2686.19	2634.68	3696.94	3580.1	3143.53	2463.79	2315.55	2154.31	3598.2	2966.96	3128.04	2891.95	1955.76	3455.92	1359.53	2828.09	2865.97	3320.31	2982.68	1355.74	1355.58	1464.89	2356.16	1773.57	1012.78	2037.83	946.657
pos_3600	Dihydrocapsaicin	61.4307	153.073	116.887	78.2593	74.8162	63.3516	187.367	94.95	203	97.7341	138.079	165.985	216.045	130.035	82.3144	101.306	211.431	104.064	80.6644	140.448	81.8703	72.0982	138.783	87.0094	85.8348	152.182	161.231	83.4984	105.034	69.0314	80.2137	115.279	143.945	81.0168	75.8469	100.012	56.7167	100.569	77.407	108.65	86.4371	104.91	81.8617	94.5171	211.291	175.021	76.9038	56.0739
pos_3607	trans-2-Enoyl-OPC8-CoA	704.748	690.238	535.374	551.058	819.228	440.028	790.346	451.175	446.215	486.612	469.627	492.215	437.276	415.91	475.733	447.279	482.778	399.765	421.143	357.799	400.71	386.01	401.591	365.609	465.647	637.967	375.434	441.959	606.306	379.274	315.195	259.577	337.928	337.806	326.39	368.905	301.89	385.365	366.707	303.399	303.207	411.089	505.714	297.547	407.029	363.833	292.381	234.709
pos_3608	Xanthosine 5'-phosphate	795.821	788.135	666.807	744.698	588.236	510.114	430.205	571.709	325.067	543.375	528.205	518.577	749.336	512.862	391.753	721.561	402.143	634.511	567.265	391.621	948.235	913.338	672.515	656.688	873.58	730.308	562.731	540.122	415.985	836.483	387.205	384.059	367.13	384.489	374.983	341.079	347.495	274.349	304.931	307.384	322.695	311.199	376.836	320.954	346.085	304.966	362.832	294.48
pos_3609	Engeletin	1524.08	3794.97	2421.81	2832.2	2635.79	2730.9	2880.4	4852.79	3703.86	3745.72	3186.38	2929.18	2336.86	1865.93	2154.29	2040.2	2575.37	1708.39	2241.84	2696.76	1441.38	1578.8	2261.74	2560.18	2773.26	2697.97	2905.77	2016.98	2221.57	2116.24	981.797	1290.59	738.461	1026.58	826.112	766.045	1066.47	1094.88	877.78	808.08	1348.79	1655.51	2551.78	1004.99	3073.26	2870.52	896.995	1841.28
pos_3610	N-Formyl-L-glutamate	3556.97	3333.25	4406.24	3691.46	3715.3	3351.89	3544.12	2721.67	2659.03	3250.42	3611.91	3421.98	3817.1	3638.94	4217.31	4035.01	3471.99	3887.41	3707	3540.23	5010.82	4642.18	4180.75	3851.99	3996.6	3784.6	3898.17	4519.72	4144.93	4195.31	2838.92	2905.67	3876.77	4377.27	4270.45	5390.2	2895.27	2993.76	3258.75	3233.38	4553.43	4099.72	3937.16	3371.15	3045.9	4008.05	4101.17	4913.62
pos_3611	Sinapic acid	21128.9	16597.9	16148.2	16311.8	27665.9	15334.2	28893.2	10443.3	13773.4	15048	13869.1	12781.9	13265.8	16151.2	17178.2	15998.7	13774.5	15908.8	14409.2	13835.8	16140	16243.8	16104.8	14365.4	14737.8	13056	14756.9	15986.3	14559.2	14594	10754	10764.8	13298.8	13490.9	13897.9	17887.3	9591.18	10334.7	10596.4	10558.1	15436.9	15029.7	13217.6	10832.5	10499.3	13137.5	12937.2	15953.6
pos_3614	Gibberellin A34-catabolite	21779.9	18294.9	14535.9	18962.1	35556.6	20695.9	41102.4	11161.3	25020.6	17117.6	16606.7	13171.8	12615.9	20395	15354	17000.8	15451.1	19118.7	14216.6	17539.3	14239.7	15670.2	18990.9	13992.4	14688.1	12484.8	16008.4	14478.4	12840.5	12316.4	15314	15375	19512	15989.5	15269.1	22741.5	12767	14725.1	15622	13468.2	18025.3	19578.3	14140.9	12997.3	10147.4	12900.2	15524	17436.8
pos_3615	N-Demethyl-desepoxyansamitocin P-3	6621.75	5581.32	6966.9	6480.64	7104.86	5394.92	7054.46	3768.69	4602.68	5582.89	5364.06	5146.23	5178.83	5256.04	7928.87	6168.84	4949.29	5843.31	5944.37	5878.97	7847.49	7463.39	6814.15	6050.38	5836.99	5629.47	6123.98	6953.79	6414.89	6319.26	3726.27	4068.46	4989.87	6203.9	5980.99	8037.17	3777.34	3955.96	4405.58	4398.67	6890.28	6064.56	5591.58	4564.59	4281.83	5948.57	5861.22	7594.27
pos_3616	AG-17	1978.75	2847.53	2558.18	2447.78	1712.66	1700.18	1423.26	1938.33	1033.81	1570.54	2009.65	1710.26	2069.42	1726.86	1572.7	1964.75	1784.61	1913.12	2632.3	1905.86	2204.87	1915.25	1900.41	2813.93	2481.44	2341.06	2105.23	2214.29	1967.68	3158.65	870.768	795.824	798.595	733.103	890.764	693.53	778.539	655.637	547.741	942.669	758.028	786.905	993.391	772.844	1300.4	1016.31	757.477	931.099
pos_3619	3-Oxododecanoyl-CoA	1209.42	970.219	1460.14	1109.81	1196.81	1048.01	997.772	794.696	730.76	1075.02	1035.36	1078.54	1199.08	1131.65	1372.25	1280.79	1023.9	1091.02	1146.29	1045.4	1914.73	1761.01	1283.06	1079.98	1331.26	1262.69	1364.11	1658.08	1500.85	1334.99	960.171	966.811	1260.34	1522.12	1483.01	1926.06	1024.28	977.125	1140.88	1100.72	1782.32	1336.82	1410.31	1208.48	1002.54	1463.72	1530.22	1880.76
pos_3625	Scytalone	44038.6	37877	46499.2	40154	35634.1	40969.6	26556.6	44023.2	33976.3	44654.2	36431.7	43237.1	44766.6	39892.1	43294.9	43875.4	41916.7	37906.4	40648.5	37574.2	51787.8	51587.9	43283	38734	47590.8	49671.9	49795.4	55984.1	53349.9	46992.2	43881.4	43615	47524	47749.9	47478.8	50436	47449.2	49157.4	52516	46961.9	55983.4	47990.3	49791.7	51204	47659.7	53800.9	52975.8	58884.9
pos_3630	alpha-Hydrojuglone 4-O-b-D-glucoside	46076.1	42137.8	49663	42429.5	38771.7	41949.4	32271.3	45591	37355.3	45481.1	38408.2	44679.1	46811.4	41499	45670.1	45336.5	42406.1	39598	42910.2	38875.9	51948.1	51726	44507	41235	48418.3	50612.8	50379.8	56886.6	53636.4	48764.7	42841.9	42678.4	47716.4	48115.1	47060.8	50567.2	46751.1	47560.1	51574.9	46985.7	55120	48254.9	50177.6	50890.7	48298.2	53478.3	52593.6	59054.3
pos_3633	Tyrosyl-Glycine	457.34	404.617	435.172	385.351	420.677	363.972	444.781	373.823	351.808	419.558	277.17	385.646	445.798	418.816	338.55	383.912	358.467	343.402	387.456	311.489	510.313	510.483	402.037	306.241	488.451	481.919	464.581	571.338	545.594	410.025	429.493	374.873	478.247	458.966	501.665	468.046	461.901	474.476	513.933	422.555	549.849	413.231	491.996	437.158	452.825	513.872	511.257	561.758
pos_3636	Hydroxysafflor yellow A	155816	155755	156994	160820	154267	143586	149581	135040	128931	152083	129871	134262	131962	139171	154181	133167	133580	133197	149606	143818	144331	153440	157196	138877	148472	146785	157313	164658	153401	146909	119335	116842	136748	138820	127547	161210	117013	126463	136399	123341	154711	148558	141059	123663	130539	145353	135330	169907
pos_3641	2-(4'-Methylthio)butylmalic acid	248.539	201.11	183.168	191.505	277.381	195.081	323.806	167.896	188.307	172.202	161.837	188.912	189.466	224.961	162.794	208.642	181.629	204.114	170.188	178.979	179.517	180.338	186.104	180.153	199.991	169.154	183.003	188.403	196.431	207.666	189.076	156.807	224.534	164.868	193.911	207.618	167.57	170.752	172.883	175.315	211.47	196.52	176.566	163.281	190.336	171.359	199.647	197.125
pos_3642	Ser Asp Met Thr	557.999	699.858	620.635	635.435	446.592	411.722	484.037	387.846	382.684	408.161	436.408	459.385	414.296	542.708	417.487	407.506	351.69	542.065	474.539	517.471	347.225	390.067	538.823	481.473	508.024	355.83	406.826	452.457	379.256	440.223	266.686	185.693	353.718	246.969	253.323	374.075	152.858	195.215	218.394	174.251	298.211	311.136	282.033	127.271	222.209	232.582	203.304	325.9
pos_3643	Coenzyme F420-1	785.693	724.797	612.611	691.141	932.788	815.417	957.129	757.831	842.429	774.068	752.754	763.968	731.353	777.321	704.035	698.656	865.968	661.551	729.714	792.752	673.845	779.721	819.135	678.274	705.172	720.769	834.51	784.333	694.198	677.477	769.468	742.667	812.047	715.899	769.204	817.19	673.394	795.265	896.708	691.999	812.88	774.609	640.489	729.576	549.771	697.755	798.194	678.2
pos_3644	UDP-3-O-(3-hydroxytetradecanoyl)-D-glucosamine	5339.9	3877.33	2675.78	3544.5	9001.3	5297.89	12098.2	2975.84	5489.88	4691.92	3475.78	3294.21	2743.64	4970.92	3861.53	3629.69	3774.27	4178.13	3463.4	4795.95	2809.6	3180.36	4252.85	2760.45	3315.55	2652.32	3338.07	2893.54	2660.3	1939.18	4156.57	4020.41	6513.82	5035.82	3092.89	6402.6	3441.63	4114.11	4219.35	3210.96	5728.7	6351.04	4162.42	3305.7	3267.01	3688.25	3812.99	4813.97
pos_3647	4-Methoxy-2,2'-bipyrrole-5-carbaldehyde	2605.03	2020.95	1174.4	1592.27	3011.06	1661.1	3691.42	915.208	1976.27	1665.78	1165.93	1014.68	945.471	1752.09	1431.65	1362.87	1225.32	1610.44	1356.87	1660.73	974.008	1159.05	1636.92	1208.4	1188.11	995.905	1154.85	1013.46	935.767	911.288	1045.13	1007.34	1382.2	1055.29	878.518	1394.96	725.257	903.873	843.068	806.835	1160.86	1331.73	912.567	671.829	747.077	738.54	755.703	973.499
pos_3648	5-O-Methylvisammioside	18657.7	13996	9337.65	12444.5	26534.1	13483.1	30202	7644.41	16124.8	13655	8804.02	8882.27	7885.88	13711.5	13570.9	10870.1	10050.9	11949.7	11319.3	13163	8273.42	10186.8	13126	9304.37	9477.36	8377.67	9726.74	9154.41	8594.47	7745.64	9859.96	9622.9	11705.3	10031.3	9225.52	12299.6	7432.73	8782.08	8686.4	7690.93	10519.9	11592.9	8178.47	7527.78	6956.1	7493.27	7703.11	9477.49
pos_3649	Alangiside	4381.89	3744.57	3377.47	3457.01	4157.66	2740.77	3950.69	2110.33	2845.38	2922.64	3107.1	2586.71	2348.39	2687.63	2780.07	2642.65	2321.37	2515.5	2803.54	2725.72	3146.88	2614.63	2936.95	2936.45	3046.25	2506.51	2905.34	2829.9	2977.12	3115.57	5654.41	5808.81	4326.05	2510.04	4786.38	2339.01	4421.45	5667.05	4601.41	3678.65	2035.44	2226.59	2126.41	2839.41	2604.8	2065.16	2404.64	1896.67
pos_3650	Pyrocatechol glucuronide	1574.31	1926.26	2239.93	1863.94	1476.83	1579.5	1558.26	1433.91	1777.82	1480.91	2073.14	2264.75	2149.45	1587.11	1772.46	2170.79	1566.37	1688.49	1466.88	1611.98	1665.98	1506.32	1530.03	2060.7	1751.46	1521.33	1523.45	1707.03	1690.19	1556.84	1439.32	1309.66	1678.53	1448.53	1538.53	1666.23	1485.15	1419.19	1307.02	1433.07	1450	1527.11	1761.56	1462.96	1712.51	1445.22	1560.42	1567.18
pos_3653	Decanoyl-CoA	3573.4	4069.08	4668.03	4146.4	2889.28	3141.7	2460.07	3453.89	4094.22	2481.72	3670.81	4096.43	4046.7	3496.91	3733.96	3776.67	3286.47	3642.78	4021.17	3751.65	4061.03	3776.1	3567.95	4346.92	3643.27	3442.22	4063.87	4289.52	3763.01	4582.95	2950.46	3003.13	2860.76	4306.23	2985.66	4126.1	4348.2	4099.4	3705.09	4067.6	4971.83	4631.44	5898.22	4935.63	7476.92	6089.52	5266.59	5780.5
pos_3654	C20819	518.194	641.804	563.946	616.514	643.663	653.907	680.927	1139.83	3473.71	894.97	915.482	727.128	782.031	999.152	506.596	800.719	1045.77	896.298	673.044	561.221	539.699	505.225	540.503	599.072	912.362	723.988	912.602	633.362	692.858	762.319	441.1	352.135	360.33	506.854	392.871	802.829	482.286	615.942	408.384	492.294	994.56	647.797	1373.12	798.603	1493.79	1403.08	935.433	1214.05
pos_3655	Aucubin	5216.12	4466.24	4429.32	3658.51	7119.61	4064.41	6786.18	3237.65	5009.19	4245.41	3714.82	4114.19	4599.3	4511.04	4132.12	4934.34	4288.67	4593.11	3766.82	3428.3	3859.94	3728.38	3844.43	3955.46	4069.32	3933	3783.5	3999.48	4039.1	3700.25	5322.19	5914.52	10802.2	7538.72	7412.14	7276.62	6913.73	7184.26	6745.45	6808.97	7478.35	6520.79	4379.34	6942.72	5254.93	4804.09	7527.03	5036.76
pos_3658	5-Hydroxy-1-(4-hydroxyphenyl)-3-decanone	1379.77	2837	2779.2	2566.83	1055.8	1247.34	664.87	1620.97	615.905	1284.74	1878.52	1473.95	1883.94	1474.92	1361.33	1743.33	1546.14	1697.16	2340.1	1682.12	1886.69	1590.21	1858.91	2690.67	2315.47	2190.83	1770.35	1889.56	1649.03	2847.74	439.502	399	348.271	356.811	408.018	360.671	425.723	310.857	305.278	567.782	455.431	457.023	686.959	419.51	944.201	651.587	361.345	544.698
pos_3660	alpha-1,5-L-Arabinotriose	16248.8	6472.63	9695.46	7783.2	11669.4	13694.5	6557.27	16366.4	11766.7	14303.5	10817.9	15191.1	20696.9	16306.8	8391.3	18640.1	17209.7	15329.9	11184.6	8843.74	15592.7	17091.8	12057.8	10936.7	14184.4	14230.3	16266.2	20655.3	13111.3	12533.2	77637.5	80896.4	99212.6	124823	89427.7	46291.6	100223	112755	108429	95604.6	40333.2	39635	20601.7	78887	25034.2	27574	71698.4	30690.7
pos_3664	Naringin	420.407	232.131	122.494	168.3	535.841	108.232	551.685	51.3219	195.066	138.95	162.81	120.629	164.77	255.595	95.6426	142.336	44.1853	164.416	121.756	154.761	101.535	134.581	161.414	103.209	118.681	76.0006	77.9738	129.083	89.2767	53.0158	398.021	453.386	619.688	591.899	626.452	441.771	439.744	526.37	535.875	484.532	295.786	281.194	169.668	370.337	123.245	159.456	441.759	216.967
pos_3666	CMP-N-acetylneuraminate	123.998	31.9488	11.3477	3.29443	38.9501	40.4592	43.1927	48.4686	41.6763	63.0919	10.6122	46.492	76.1988	59.3406	34.3083	59.5704	54.3808	34.3292	17.988	3.37501	51.1608	55.5045	13.5354	0.623148	53.9165	44.4179	43.2869	82.935	38.4201	14.299	406.3	395.029	466.272	497.994	440.073	274.545	446.761	490.348	511.482	448.396	213.74	214.478	138.911	410.755	139.52	140.216	406.076	139.002
pos_3668	Artonol B	1291.61	759.356	1297.17	670.276	1198.3	1167.57	610.032	1058.81	1985.97	1031.59	777.941	1459.54	2449.45	1351	1413.41	1694.38	1769.06	1218.85	1193.51	987.497	1368.24	1166.98	1091.8	1245.9	1259.41	1194.23	1405.64	1982.87	1051.41	987.223	2705.82	3104.84	10063.9	7595.54	6582.22	5131.82	5540.64	5325.15	4675.05	4956.57	6967.48	6282.05	1953.25	5837.13	2932.68	2729.16	6349.4	4258.77
pos_3669	Isomaltotriose	109.783	60.5456	60.6959	48.5794	91.6161	56.3657	98.0877	58.2993	77.8291	30.1626	25.1729	63.1497	99.9784	94.9109	18.6162	57.2905	55.1911	54.81	62.5215	45.3278	33.9128	57.4449	35.4341	30.4241	63.6385	55.6431	12.4878	45.6098	39.4025	51.5423	245.937	259.645	265.977	302.094	253.118	139.903	303.361	342.957	275.869	257.113	104.678	85.6738	93.1391	231.08	37.9953	58.4234	191.077	60.6278
pos_3672	(7'R*,8'S*)-Methyl 4,7'-epoxy-3,8'-bilign-7-ene-4',9'-dihydroxy-3',5-dimethoxy-9-oate	11770	8697.59	5903.27	8269.82	14430.5	9192.92	16036.9	5638.79	9317.28	9104.47	7709.86	5958.32	5539.76	9618.86	6645.31	7355.01	8148.9	8914.83	6769.35	8664.37	5889.18	6754.88	8779.25	5968.71	6664.13	5319.57	7295.68	5978.21	5067.7	4720.91	7212.82	6734.25	7906.41	5124.41	5334.24	7988.03	5012	6421.53	5977.58	5234.81	6336.49	7638.48	5794.99	4616.5	3931.32	4778.21	5211.61	6420.66
pos_3673	m-Xylene	228.913	317.642	282.109	290.288	189.382	233.996	274.718	226.779	222.048	233.497	336.586	282.942	278.718	251.564	242.614	205.271	320.089	302.796	301.105	308.146	244.247	200.179	249.831	267.687	370.354	434.282	157.278	167.247	343.717	225.026	67.7824	49.7425	119.487	99.2391	50.3434	165.64	102.142	59.9615	156.174	110.275	129.921	143.795	151.501	77.653	102.14	75.6185	58.2787	53.5516
pos_3675	3,4-Dimethylstyrene	795.429	992.893	910.64	932.905	678.263	741.975	903.942	779.709	767.826	794.156	1009.03	844.572	911.478	819.152	816.962	768.013	990.212	899.186	937.247	933.092	843.315	742.267	809.685	878.903	1211.68	1273.85	632.763	698.837	1087.57	793.371	378.812	323.368	506.431	481.918	384.397	665.811	469.773	411.455	592.867	477.278	557.946	544.279	619.282	441.653	486.745	431.129	379.634	375.475
pos_3678	7-Oxo-11-dodecenoic acid	3641.66	4264.87	3868.63	4161.17	3459.4	3985.95	4678.34	3243.01	3799.2	3742.91	4696.74	4231.25	3810.37	3582.8	4022.53	3448.71	4712.77	4475.32	4023.15	4191.97	3716.46	3370.27	3726.17	3748.04	4911.92	5965.43	2770.37	2866.41	4950.49	3297.88	1498.58	1314.87	2252.41	2396.51	1476.38	3145.22	1931.32	1637.82	3029.12	2160.95	2757.43	3008.84	2597.88	1795.34	1904.33	1820.6	1670.65	1442.5
pos_3680	alpha-Amylcinnamyl formate	458.67	526.882	536.032	506.891	393.482	406.93	465.217	415.366	384.87	415.456	488.285	439.977	481.333	479.948	422.637	428.679	481.115	506.456	491.872	478.146	439.849	398.747	422.459	518.67	555.768	528.54	403.867	421.828	491.387	502.739	247.163	210.805	294.02	257	243.927	319.923	278.862	234.4	276.561	280.877	295.983	308.861	319.99	252.169	301.313	263.1	227.024	267.007
pos_3682	(9Z,15Z)-(13S)-12,13-Epoxyoctadeca-9,11,15-trienoic acid	39748.1	52835.2	47339.2	51140.4	37124.6	47330.9	49138.6	40165.3	42555.9	45848.8	59126.8	51178.5	49079.3	42117.5	46264.2	39879.2	59675.5	53311	50447	53175.1	47207.5	40101.2	43928.7	42234.4	66063.3	82013.2	30265.5	29072.9	59548.1	33841.2	13107.7	10677	20410.1	23705	11598.6	31884.9	18463.4	14058.7	31853.2	19509.6	25625.8	28375.8	25617	16175.4	16594.1	14751.8	14192.6	9539.13
pos_3684	19(R)-hydroxy-PGA2	10922.6	13209.7	10724.3	13775	10885.8	14883.2	18332.9	11421	15218.9	13547.2	16406.5	14891.4	13142.2	12522.2	15073.3	10128.1	18212.6	15299.9	14042.1	17126.7	12419.6	11262.6	12457.1	10149.4	17977.1	24006.5	7843.99	7305.25	18116.4	7993.85	3883.71	2995.48	6492.02	8335.61	3002.16	12046.1	5780.56	4049.55	11781.6	6171.45	10247.9	11201.6	9174.53	5094.35	4558.15	4876.99	4182.54	2985.67
pos_3685	Dhurrin	1858.41	2114.41	2002.97	1914.4	1992.51	1735.87	2401.43	1508.1	1790.93	1666.04	1909.12	1735.3	1840.52	1957.36	1922.07	1874.11	1793.64	1895.09	1898.73	1941.71	1436.35	1415.23	1797.57	1885.2	1854.05	1719.48	1489.22	1593.37	1551.17	1658.96	950.465	831.014	1070.49	970.004	857.315	1238.73	861.619	749.743	931.377	999.573	1242.04	1406.48	1561.5	857.557	1219.26	1322.1	879.696	1402.34
pos_3686	Ginsenoside Rk3	851.261	1997.54	1442.69	1849.25	810.904	1630.59	1569.93	1044.58	1434.83	1475.22	3133.61	2101.24	1663.83	1361.13	1808.07	1021.96	2778.65	2289.83	1933.24	2277.47	1676.62	1099.02	1443.57	1200.52	3371.49	5588.66	434.65	374.951	2843.31	793.899	3.70859	5.82248	232.146	431.052	4.08389	791.566	184.826	13.5248	888.781	225.235	513.169	617.494	541.576	85.2701	175.43	51.8499	10.4729	21.9861
pos_3692	Nocardicin G	13600.5	11938.8	7283.38	11355.2	23117	10723.3	26944.4	6370.48	18166.9	9446.98	8682.76	6991.87	6535.37	12212.9	7277.88	9034.77	7831.66	10086.4	7514.16	8803.4	5744.42	6679.88	8759.03	6566.94	7676.62	6233.49	7338.11	6018.34	5646.93	5910.69	6933.11	6985.05	6208.8	5583.4	5896.95	9751.18	5162.13	5634.97	6116.48	5176.7	5956.99	7178.05	5027.04	4957.85	4355.75	4330.86	5224.04	5549.31
pos_3695	Phenylalanyl-Histidine	11544.1	8469.74	5147.16	6873.74	20251.2	6954.66	22201	3402.47	8249.41	7680.03	4528.89	4661.51	3992.92	7994.42	6409.63	6262.48	5262.12	6885.46	5142.93	5676.33	3698.91	4337.05	5263.42	4477.04	4721.65	3762.58	4514.07	4335.5	4153.81	3871.96	3679.57	3489.1	5066.81	3450.41	3552	6594.73	2377.24	3056.91	2848.29	2614.73	4166.64	4798.07	3854.68	2479.9	3016.56	3118.5	2896.23	4232.27
pos_3699	Propionyladenylate	3201.92	2525.74	2181.73	2484.5	2970.43	3204.98	2125.64	4182.79	3000.46	3959.43	2925.6	3421.69	5215.31	4397.87	2105	4401.77	5617.68	4938.16	3928.15	3197.92	3696.19	3327.71	3529.44	3196.61	3539.27	3515.29	3993.38	3219.85	3243.72	2740.69	4424.41	4393.67	6789.81	6567.25	5483.33	4806.29	6885.88	6670.82	6378.06	5816.9	10398.9	10227.9	5000.53	6312.75	5959.77	6199.18	6344.09	6693.83
pos_37	Urocanate	21799.8	21098.9	19690	20808.1	20559.3	20467.4	25260.5	18512	22107.8	19984.3	18569.2	20167.9	18854	19072.9	20347	18616.4	18974	19499.6	19472.4	18184.9	19293.9	19709.4	19060.9	18465.5	19429.6	19238.8	19916.5	18875.3	19058.5	20561.6	17296.4	16987.7	17523.4	17352.1	17141.6	18159.4	17587.4	17329.9	18161.7	17750.4	19769.5	20240.3	18087.2	17198.4	18443.7	18647.1	18008.2	19784.9
pos_3701	2'-O-methylinosine	6666.93	4833.95	2724.39	3560.99	9816.92	4586.91	11601	2356.4	5279.59	4374.1	2923.77	2949.99	2548.05	4692.23	3483.62	3602.19	3360.34	4324.08	3257.76	4096.7	2484.74	2942.91	3998.01	2952.92	2989.21	2320.66	2969.47	2834.49	2575.56	2225.25	2875.82	2626.6	4526.19	3300.61	2592.17	5127.28	2174.13	2585.04	2577.16	2265	4178.22	4606.31	2734.33	2005.71	2026.54	2159.72	2294.97	3212.05
pos_3705	Aloesin	17099.5	12337.9	7133.79	9384.73	25893.9	10396.6	30893.4	4939.41	11883.6	10033	6072.49	6322.04	5818.42	11822.8	9185.75	8967.42	7226.91	9636.28	7968.58	8776.33	5199.31	6318.16	8527.8	6699.54	7005.76	5134.27	6291.48	6117.37	5904.77	5338.27	5618.4	4839.99	7860.6	5642.86	4638.95	9473.8	3330.61	4106.95	4043.39	3721.45	6907.31	8103.25	5305.93	3357.89	3855.07	3985	3970.8	5689.45
pos_3706	12a-Hydroxyisomillettone	9814.11	3110.64	4046.05	3812.48	6491.76	7702.58	3606.11	8034.62	5501.95	8260.81	8004.39	6786.71	9945.2	9282.73	3339.99	9500.48	9308.77	8756.48	6693.21	7316.94	11725.3	10473	8702.1	7698.47	10196.2	8943.22	10456.5	6481.23	5668.07	5892.46	12823.3	12354.8	11528	15994.2	15103.3	8284.8	12632.2	14216.9	12667.9	15151.2	5759.77	5366.02	5328.37	15145.3	6063.6	5406.66	14746.6	6699.44
pos_3707	Phosphonoformyl-CMP	194.861	18.486	50.8905	49.7379	133.353	194.086	62.5713	178.982	118.104	182.62	141.774	194.917	198.102	170.647	71.2916	180.859	215.187	207.109	100.038	143.397	263.364	241.438	154.481	110.232	194.211	223.756	221.398	107.672	107.414	95.1981	414.858	457.552	664.739	651.518	545.568	533.14	437.393	456.366	479.894	604.057	274.691	158.487	206.798	538.756	146.065	160.087	613.866	238.519
pos_3708	Sec-O-Glucosylhamaudol	406.258	256.752	213.925	225.084	391.146	329.353	418.59	188.738	201.073	291.749	231.468	207.749	277.477	273.194	182.538	263.214	231.983	263.718	220.905	256.173	196.514	222.639	258.478	198.993	264.99	181.268	264.118	182.522	175.037	93.2719	289.212	262.02	375.199	340.198	373.083	282.42	261.234	279.915	291.538	300.497	208.852	218.903	149.347	278.087	113.124	129.246	321.45	175.961
pos_3714	Monotropein	128.962	78.3915	32.0048	27.8703	160.996	83.4975	169.788	39.1018	70.9176	57.0164	21.5075	42.725	49.7273	64.3974	54.3136	53.2977	15.9745	25.8732	39.8263	31.3343	6.771	17.4302	11.685	1.09515	20.8913	44.9803	10.5884	11.1187	33.7503	8.14943	326.336	343.834	354.348	216.222	290.563	89.6639	132.883	301.443	217.699	161.263	129.208	108.762	112.039	235.061	55.2401	94.5575	186.059	57.7887
pos_3718	Pelargonidin 3-O-glucoside	528.176	690.73	1152.87	479.967	511.362	437.927	417.218	549.933	491.769	368.952	376.199	683.079	998.957	518.729	890.296	847.79	555.686	475.149	742.734	550.434	532.141	465.547	449.903	738.858	532.928	634.706	560.313	1296.19	739.593	583.499	1508.41	1741.72	7340.9	3483.03	5214.59	2574.48	2402.38	2397.76	2434.03	2164.13	2103.62	1305.02	852.87	3080.24	1024.72	980.59	3487.04	1113
pos_3720	(±)-Anisoxide	1255.48	1175.73	1163.46	1107.59	1067.61	1016.93	1308.61	1083.52	1096.92	1002.46	1058.56	1059.15	1140.51	1144.53	1041.17	1100.52	987.225	1071.52	1089.02	1030.74	1028.95	996.078	1026.04	1187.78	1214.37	1060.89	1090.09	1068.44	1099.84	1268.89	968.171	889.519	1022.23	953.702	1052.17	995.498	1014.57	904.822	881.291	1002.28	941.363	960.685	952.307	929.76	994.726	961.702	966.92	1030.04
pos_3721	Zerumbone	17076.5	16582.4	16574.1	16568.3	15286.1	16087.3	18969.4	16616	17379	15489.6	14847.6	15942	16636.1	16861.6	15874.9	16022.8	15033.9	15855.4	16068.7	16168	15471.2	15275.3	15102.9	16568.7	17618.2	15437.5	16319.9	16218.9	16155.6	17825.5	15551.5	14579.5	15170.9	14683	15528.4	15626.9	15918.7	13969	14441.8	15329.6	15877.2	16161.4	15339.5	14432	15148.8	15673.9	15388.4	16959.4
pos_3722	3'-Amino-3'-deoxy-AMP	206.183	293.82	538.426	242.901	304.906	211.295	372.598	99.5113	159.207	182.433	225.977	421.211	290.945	174.268	234.745	291.517	161.667	146.004	150.038	177.08	93.7389	108.473	184.841	238.304	144.14	103.312	77.173	520.409	117.978	44.2241	106.379	154.047	1773.03	182.594	414.045	142.266	113.322	111.968	103.322	97.0328	104.314	109.204	148.221	76.4454	28.0077	32.6913	102.6	102.575
pos_3723	8-Methylthiooctanaldoxime	695.325	1166.97	568.301	774.28	1130.62	831.936	1070.75	676.769	315.593	656.446	1462.43	760.697	963.027	1667.16	490.825	962.226	1224.61	1643.5	655.42	995.526	632.229	785.808	680.296	1005.45	577.596	1185.37	1073.54	510.326	974.188	975.767	289.144	211.22	380.114	216.729	634.51	390.634	816.688	746.917	569.939	478.216	300.55	171.388	586.239	696.221	1059.84	1210.54	493.317	488.532
pos_3727	Octanoic acid	150.733	116.036	119.549	99.7283	116.553	103.866	127.023	117.683	137.873	125.296	141.983	83.6124	107.599	122.77	122.515	126.013	179.338	152.565	98.8576	107.098	122.72	127.076	91.6991	140.605	116.504	103.046	105.335	120.75	102.852	102.557	120.403	119.505	139.968	111.745	80.2087	95.7956	137.415	140.215	94.69	105.15	131.257	81.0114	110.475	138.107	110.028	141.649	106.928	99.6599
pos_3728	[8]-Dehydrogingerdione	3206.47	3767.84	3967.54	3334.6	2581.69	2149.89	2332.37	2626.06	2442.28	2403.21	3083.2	2506.77	3016.61	2899.66	2240.17	3200.87	2368.82	2836.94	2824.09	2536.62	2686.48	2349.24	2578.17	3672.58	3092.78	2516.38	2584.69	2832.27	2518.57	3836.91	2215.98	1870.93	2248.27	1864.09	2630.81	1773.82	2260.28	2271.35	2043.5	2205.4	1401.9	1524.57	1821.73	2073.95	2164.28	1668.53	1915.96	1531.01
pos_3729	Phellodensin F	668.287	361.207	260.457	254.301	766.425	410.533	856.409	162.655	415.321	386.976	136.968	93.9391	142.759	283.856	295.558	527.364	127.655	287.609	154.299	214.185	130.261	92.1089	165.779	141.367	173.38	44.2057	85.7923	153.149	35.7859	200.483	91.9662	83.551	695.51	544.196	830.371	673.158	114.725	371.03	176.708	125.207	355.317	234.732	620.618	717.24	895.758	891.274	1151.03	418.781
pos_3735	1F-Fructofuranosylnystose	11619.9	12124.8	9031.16	13009.6	11864.9	11801.4	14459.4	6186.33	10403.8	11823.6	14852.8	10245.5	5773.83	9435.26	12040.7	7149.16	8667.27	9213.24	12798.4	17191.3	7277.47	9083.61	18711.2	10165.9	10372	8178.39	11322.2	9597.85	7945.4	5779.17	6428.8	5950.65	4585.14	5957.4	5485.15	8644.74	5142.26	6999.23	7449.1	7051.08	7106.45	9481.24	9021.89	4604.77	4702.29	7934.71	5170.36	10469.6
pos_3736	Precorrin 3A	3371.26	2508.56	1858.16	2063.37	5746.22	2475.97	7488.36	1226.79	3334.77	2552.06	1856.61	1864.05	1521.36	2510.89	1897.96	2161.54	1852.18	2297.05	1609.49	1817.95	1408.11	1649.69	1648.36	1600.82	1805.06	1380.59	1614.64	1438.67	1349.15	1345.22	2284.3	2305.23	2906.42	1806.9	2088.66	3597.04	1531.39	1950.61	1937.46	1449.98	1634.66	2079.46	1428.59	1330.32	797.731	973.025	1378.48	1678.19
pos_3738	Oxytetracycline	19885.9	4230.05	5206.64	3224.4	11069.1	11738.5	5831.15	19076.6	3616.44	12088.1	10672	13175.9	17754.1	17882.5	5448.88	14790	19767.3	12156.5	19641.6	16606.4	27949.4	23653.7	13623.6	17678	20764	21748.6	19811.3	8097.8	7064.92	11747.4	13515.9	10900.8	5392.43	4931.82	12808.8	3099.36	7558.81	8585.11	6090.87	14988.9	2634.99	3119.4	5105.2	8580.92	6853.06	4288.74	7382.28	4556.36
pos_3739	dTDP-4-oxo-2,3,6-trideoxy-D-glucose	427.858	26.2068	55.9184	20.9066	179.564	314.846	72.2033	484.927	32.7032	285.778	183.627	313.599	371.453	381.617	88.4322	289.784	482.547	274.154	447.832	401.781	633.12	570.857	278.306	392.304	436.234	497.542	493.918	136.328	148.395	220.577	361.924	289.403	91.4581	88.8799	401.875	17.976	166.64	170.039	127.037	390.275	28.0383	33.3835	108.297	199.251	137.042	83.6387	162.065	116.773
pos_3741	4-(Ethoxymethyl)phenol	861.175	848.818	824.533	758.523	830.927	708.688	939.26	707.253	711.622	693.732	713.516	717.936	758.265	787.588	703.938	760.525	694.297	756.814	716.931	677.908	696.679	689.781	726.306	798.444	773.731	700.423	780.018	769.127	746.745	854.034	678.956	641.199	679.687	590.972	745.782	659.047	671.355	659.341	644.757	687.51	637.911	658.496	639.068	607.614	654.977	630.264	628.11	703.124
pos_3742	Isoamyl 2-furonpropionate	6410.01	5699.79	5708.27	5973.78	6022.01	6123.28	7433.89	5723.53	6953.21	5895.17	5190.16	5677.08	5412.67	5820.64	6087.27	5786.36	5566.6	5675.53	5271.81	5589.33	5342.16	5629.84	5541.1	5513.84	5626.63	5482.69	6082.67	5760.12	5788.05	5939.91	5574.83	5687.34	5404.79	5639.26	5580.6	5965.39	5659.07	5324.87	5644.02	5692.06	6111.81	6315.05	5598.57	5499.84	5496.24	5909.76	5720.04	6576.49
pos_3745	Chrysophanol	1070.47	2387.95	2427.6	2631.12	1319.58	1602.86	1219.13	1540.91	1366.8	1681.9	1783.06	1953.93	2145.57	1914.57	1546.91	2118.51	1971.64	2031.16	1209.97	1579.12	1295.81	1723.22	1780.42	1199.02	1888.25	1719.59	1876.55	2070.18	1857.74	1329.41	1588.15	1469.12	1036.91	2541.58	1561.48	2775.12	2370.38	2183.79	2382.81	2194.38	3576.67	3329.88	3182.79	2293.04	2474.24	3124.37	2392	3596.47
pos_3747	Cephamycin C	5732.09	7202.67	3975.09	3722.97	5598.02	7562.63	2735.54	6336.55	4339.18	7213.34	7288.65	9705.93	6798.08	5851.13	5041.97	6153.8	5007.77	6313.41	3891.32	2298.06	5497.28	5254.82	5064.73	4447.42	6754.42	6604.93	5822.63	3367.12	5473.79	4608.4	9549.02	11124.8	8233.71	4505.54	9773.82	6037.08	9500.38	10409.2	12214.1	9190.89	5273.77	4814.69	5136.19	7002.01	3500.55	3817.79	6065.64	3213.78
pos_3749	CMP-N-trimethyl-2-aminoethylphosphonate	403.973	130.188	102.549	107.955	276.948	173.94	352.74	247.792	221.555	174.657	169.321	147.901	326.982	361.036	61.8134	203.236	198.809	167.076	277.903	237.943	285.83	263.461	166.113	193.357	291.329	204.316	251.638	108.278	62.582	96.349	202.997	156.473	187.823	65.1537	281.171	83.1647	129.769	117.495	131.381	156.203	23.5805	45.8627	93.7323	125.311	61.194	7.47588	125.813	36.0401
pos_3752	Cyanidin 3-glucoside 5-caffeoylglucoside	8503.94	10485.6	5173.54	4320.88	8309.97	10936.1	4066.29	8760.76	5864.6	12076.9	10731.1	15202.1	9001.59	7334.98	7935.85	9442.67	6662.34	8857.67	4930.58	2164.63	7944.46	7270.44	6665.62	5645.58	9177.48	9725.33	7375.62	4128.19	7820.46	5793.08	15257.7	18344.2	13028.2	5919.46	15088.4	8616.63	15379.4	17267.2	19148.8	14259.2	7795.02	7219.96	7827.94	10909.6	4604.21	5305.54	8603.21	4974.93
pos_3753	Desoxyrhaponticin	1605.36	1075.2	735.451	1020.46	3516.26	1631.51	5506.74	598.746	2149.38	1571.31	1081.13	1141.31	710.521	1573.67	909.097	1193.27	1081.81	1394.33	745.636	984.305	630.091	821.485	810.972	593.02	924.205	639.973	874.473	652.516	580.932	517.658	1444.33	1346.22	2099.21	1417.23	1257.23	2656.56	925.375	1135.03	1226.28	833.532	1261.73	1605.05	934.245	852.561	495.623	594.652	914.307	1266.88
pos_3755	6-Acetophenazine-1-carboxylic acid	2267.84	2766.2	2427.47	1949.92	1863.58	2086.77	1529.51	2111.3	1588.43	2080.47	2349.43	2601.07	2530.44	2101.8	1898.58	2325.8	1828.33	2234.92	1866.89	1387.68	2045.41	1879.46	1891.53	2257.83	2319.45	2202.74	1945.24	1896.53	2041.71	2330.03	2239.56	2552.4	2583.16	1555.31	3055.94	1797.61	2267.8	2790.57	2570.54	2250.98	1532.16	1342.19	1775.52	2231.57	1914.75	1560.3	1979.92	1276
pos_3757	Dihydrozeatin-O-glucoside	3886.05	4671.16	4762.79	4388.09	3590.99	2822.03	3123.27	3980.86	2239.84	2888.51	3587.45	3120.35	3994.77	3966.94	2866.93	4364.13	3516.61	3767.69	4989.17	3607.73	3359.64	3299.88	3723.47	4945.62	4301.2	3644.79	4037.57	3883.14	4238.02	5730.25	2002.33	1582.94	1168.82	1620.71	1869.05	1478.31	1332.32	1032.49	884.396	2005.96	1602.23	2015.91	2509.07	1639.59	3183.29	2438.94	1340.29	2019.17
pos_3761	Jadomycin A	443.899	451.288	413.243	512.006	479.303	381.621	479.925	209.96	367.404	325.055	342.749	302.429	219.901	384.86	345.505	319.222	248.558	350.3	337.853	386.884	229.446	288.698	443.35	330.582	347.764	249.434	330.679	355.173	270.113	286.114	234.872	212.09	267.608	241.01	259.047	295.055	222.248	253.839	290.571	236.139	261.301	334.047	266.024	136.735	48.8967	175.476	183.914	317.454
pos_3763	Ajugol	5975.28	6544.73	4463.76	7625.72	5683.89	5065.09	6399.87	2248.28	4794.04	4965.65	4464.29	3195.98	2555.03	4383.88	5181.36	3370.97	3523.25	4299.17	3197.65	5345.4	2795.87	4301.68	5067.85	2698.92	3788.82	3223.87	4452	3861.14	3270.66	2692.99	1834.91	1804.94	1380.58	2024.69	1639.87	4357.65	1772.95	2251.87	2465.12	2113.22	3971.18	5332.64	4922.44	1666.27	1482.3	2945.08	1813.17	5686.18
pos_3764	(11Z,14Z)-Icosadienoyl-CoA	2733.39	1827.76	1261.89	1577.22	4329.78	1761.49	5769.38	791.275	2620.73	1901.84	1656.75	1325.73	932.479	2080.4	1549	1409.99	1236.82	1838.59	1156.49	2008.48	1027.43	1162.1	1436.42	846.587	1195.96	910.094	1113.61	1036.82	874.926	667.544	2423.22	2076.77	1816.53	1838.05	1119.51	3551.9	1476.16	1384.59	1654.42	2438.94	3399.95	2596.75	1128.77	1110.92	577.366	846.099	953.024	1813.02
pos_3772	(±)12,13-DiHOME	13755.7	18450.7	26582.6	17274.8	9862.96	11576.3	3769.53	15674.5	5549.65	13276.9	11470.3	14771.2	20479	11444.6	11935.5	19517.2	13984.7	13347.3	18516.4	11472.4	21066.6	16900.2	14387.1	19759.6	21406.9	18371.6	15209.3	15637.7	15485.1	15902.3	6860.21	6433.25	6339.57	4749.44	8549.85	3056.48	6454.41	7753.91	6098.59	4988.13	3993.53	3034.39	5927.88	7724.1	8139.47	6073.46	7783.84	4786.22
pos_3780	2-(4-Methoxyphenyl)naphthalic anhydride	761.705	742.706	873.812	699.187	988.514	647.509	1064.7	656.545	824.546	729.736	602.963	875.335	814.45	679.751	918.715	772.638	580.23	603.743	523.218	518.813	628.478	645.887	638.274	512.644	614.22	718.253	584.582	695.254	731.657	688.349	1136.82	1049.75	1045.84	1038.55	1077.09	1052.05	1102.35	1068.17	1245.63	1090.63	1014.53	906.442	1139.61	1023.49	813.366	932.444	1023.1	1081.5
pos_3782	Epimedoside C	1841.85	2715.07	3274.13	2624.56	2576.85	2192.14	2857.69	1999.04	2397.01	2360.35	1934.55	3089.34	2538.83	1945.03	3461.75	2404.42	2019.2	2033.21	2005.92	1837.46	1733.88	1940.16	2439.91	1779.26	1802.27	2174.34	2016.47	2631.74	2560.67	2383.99	4018.66	3782.93	3188.75	4709.37	3889.02	4642.12	4537.55	4110.2	5088.21	4550.98	4866.87	4340.66	4978.38	4230.73	3270.51	4394.07	4515.1	5417.01
pos_3783	Demethoxyegonol	178.618	107.989	56.0258	84.5499	274.504	118.503	337.781	19.2473	183.205	128.457	65.4306	54.1225	55.4236	120.044	110.847	77.3435	70.7043	66.0765	78.3173	57.4649	28.2563	37.7947	116.923	42.8865	44.5355	43.2377	38.0299	71.3235	69.2028	52.6898	155.329	136.71	148.12	128.703	122.179	198.422	160.639	151.461	177.951	164.39	157.079	167.751	216.942	145.974	106.222	149.96	110.303	237.968
pos_3784	Nivalenol	536.747	404.143	146.454	216.058	928.082	628.896	602.862	240.084	451.618	370.513	411.046	558.698	327.262	409.277	434.932	417.272	153.321	383.291	220.701	96.5975	635.882	275.856	353.103	235.354	456.983	311.057	290.63	237.067	383.265	254.391	392.305	479.126	363.073	550.375	435.229	789.274	514.302	493.224	432.259	711.786	272.053	251.322	676.986	940.023	827.352	827.574	749.957	460.555
pos_3785	10-Deoxysarpagine	3646.54	4266.71	4075.45	4507.51	3497.5	4095.77	4129.58	3170.45	3333.7	3840.63	4449.1	3806.06	3802.85	3835.29	3559.73	3678.35	4950.64	4025.95	4082.04	3824.04	3400.05	2983.48	3696.28	3609.81	4941.24	6910.75	2682.36	2893.24	5413.81	3488.12	1676.05	1254.79	1867.68	1972.85	1754.5	1805.5	1764.29	1366.53	2270.87	2104.11	1826.52	2051.94	2122.5	1526	1645.16	1519.7	1272.84	1448.15
pos_3786	Pinostrobin	1280.68	1303.08	1395.08	1279.72	1340.03	1526.44	1501.18	1573.81	4065.08	2095.64	2061.74	1570.69	1639.83	1979.97	1048.65	1769.17	1758.5	1874.6	1378.75	1320.24	1413.25	1317.62	1485.62	1364.35	1659.14	1533.95	1564.44	1465.15	1432.13	1559.11	3157.23	3113.73	4532.26	3145.37	7008.78	4758.98	2944.52	5251.68	3663.65	3841.47	3238.33	1730.06	2311.37	3571.21	1714.72	2054.01	4098.63	2295.91
pos_3790	10-hydroxy-2E-decenoic acid	5478.02	4497.57	4830.57	4758.18	4642.3	4515.68	6066.54	4586.64	5886.41	4750.71	4201.28	4641.96	4945.03	4908.68	5166.08	5161.69	4207.88	4386.6	4628.08	4755.47	4589.26	4757.11	4402.17	4712.77	4990.89	4516.6	4748.54	4911.8	4598.02	4995.37	4615.99	4537.73	4997.77	5127.88	4598.45	5370.84	5363.36	4848.16	4646.51	5036.55	5172.73	5011.35	4931.33	4913.56	4573.76	4983.44	4962.1	5786.6
pos_3793	Idebenone Metabolite (Benzenedecanoic acid, 2-hydroxy-3,4-dimethoxy-6-methyl-5-(sulfooxy)-)	12516.3	10761.8	11123.2	11126	11737.5	11449.7	14669	10792.8	13369	10337.8	10229.5	11186.8	10995.3	11275	11458.7	10989.2	10157.3	10776.8	10427.9	10893.3	10789.5	11041.3	10596.6	10834.8	10933.3	10278.6	11481.9	11357.8	10515.1	11466.6	10945.6	11006.2	11724.2	11548	10977.7	11967.3	11336	10802.6	11212.8	11688	11596.1	11410.6	10792.5	10799.1	10910.1	11488.4	10833.5	12243.4
pos_3795	Nicotinate	479.038	358.862	379.017	356.801	403.368	390.503	563.117	378.033	488.096	378.057	338.645	399.984	440.543	440.264	427.079	399.169	352.21	370.595	377.856	394.113	358.056	384.442	358.495	379.226	411.058	362.104	400.717	412.774	401.215	417.107	426.57	400.917	495.691	490.738	447.176	526.755	531.757	428.023	438.888	465.694	508.129	475.724	463.196	444.659	417.062	455.262	468.189	565.034
pos_3796	N-Acetylornithine	107.563	144.633	139.326	97.9668	77.4996	105.025	43.6511	109.363	106.254	107.239	90.8085	163.048	164.915	90.9079	176.784	150.341	88.6585	97.401	93.6616	77.2658	106.634	104.818	131.195	128.399	95.3358	92.6851	154.412	179.383	112.677	177.326	525.025	572.67	394.573	391.906	600.171	358.317	570.766	626.286	546.089	535.602	395.825	343.62	377.692	509.606	304.84	455.181	506.208	477.406
pos_3800	2-tert-Butylphenol	709.49	879.185	838.28	1007.34	782.539	890.048	1039.3	554.664	729.262	800.797	961.155	786.428	745.832	771.682	825.13	673.266	1146.68	904.609	896.763	911.389	668.787	644.944	776.721	682.341	1238.2	1828.57	497.549	514.611	1538.59	580.098	263.119	195.432	382.227	446.519	251.385	450.621	290.68	244.602	619.073	365.701	506.021	511.634	497.876	296.869	305.605	296.195	230.87	233.578
pos_3802	2,6-Diisopropylhydroquinone	4526.18	5640.05	5281.57	6193.01	4882.81	5607.19	6789.61	3632.85	4740.24	5241.53	5958.32	5003.71	4772.16	4906.53	5508.61	4120.08	7168.63	5670.48	5580.84	5594.12	4446.38	4203.2	4822.05	4134.24	7622.98	10847.7	3025.55	3158.74	9116.24	3432.62	1541.97	1068.84	2484.79	3065.37	1295.3	3178.21	1961.93	1725.69	4208.7	2399.83	3588.21	3599.04	3407.07	1910.23	1875.67	1984.97	1600.69	1574.94
pos_3807	(±)13-HpODE	21123.5	27335.5	26596.3	32427.6	22983	27396.3	32270.8	17732.9	22494	25504.9	29805.9	24248.9	23295.8	23893.1	25911.2	19716.6	36622.7	27758.8	28096.6	28129.7	21069.7	19729.9	23051.4	19618.9	38998.7	59297.8	14178.6	14292.6	47293.1	15530	6440.95	4343.56	10043.8	13070.9	5516.16	13040.8	8354.23	6641.3	18835.9	9968.69	14789.5	14966.6	14366	7507.05	7445.2	7854.57	6180	5494.09
pos_3809	9,10,13-TriHOME	13807.5	16587.9	15598.6	21188	16261.4	21600.7	33448.6	12956.8	19737.1	19542.1	19426.4	16985.7	15364.8	16929	20820.4	12636.6	26317.2	19194.8	19600	22294.6	14523	14637.7	16431	11939.2	25343.6	38976.9	9882.67	9751.8	32207.6	9222.96	5123.17	3399.86	7853.1	11731.2	3559.72	12575	6574.9	5289.26	16644.3	7370.27	15088.3	15318.1	12887.6	6532.49	5501.9	6907.26	5251.73	5404.5
pos_3811	Rhodovibrin	345.073	664.697	563.959	913.224	411.607	619.527	707.734	192.594	437.199	603.68	874.728	561.786	502.45	525.271	612.908	310.804	1136.24	677.288	776.432	707.008	409.894	300.355	470.013	311.789	1402.96	2922.3	109.301	98.8831	2038.9	112.875	1.31524	3.21794	24.9	144.837	0.50803	106.888	15.3954	6.14431	337.909	29.9813	202.267	205.415	195.991	10.9184	11.3575	25.6634	3.63631	20.8158
pos_3814	2-Methyl-4-pentenal	207.219	249.233	235.826	262.763	200.55	241.165	292.918	174.347	192.468	209.46	268.487	228.385	225.744	234.225	221.953	177.758	312.16	251.737	260.98	260.519	176.26	176.83	214.176	192.626	361.887	445.693	137.564	146.147	418.288	169.176	81.7107	45.5129	108.719	125.27	63.1515	127.228	94.8127	67.9061	172.245	106.273	153.459	157.341	153.41	76.9907	80.2869	78.9224	71.9278	56.4032
pos_3815	Brevianamide F	3259.73	3160.44	3524.78	3194.1	2237.61	2820.8	1703.18	3724.92	1510.68	2284.36	3552.96	3147.95	3731.61	3393.33	2414.96	3914.09	2920.2	3201.34	4039.18	3140.97	2795.85	3015.56	3372.59	4598.66	3569.89	3044.87	3894.36	4000.38	2820.48	5496.35	2120.92	1889.95	1672.2	1594.45	2652.13	1207.99	1844.6	1096.53	1018.1	2977.12	1385.66	1437.56	1728.7	1647.18	2410.98	2136.86	1625.92	1813.07
pos_3817	3-{[(2E)-4-Amino-4-oxobut-2-enoyl]amino}-L-alanine	43.3212	18.2319	1.88271	8.58151	174.553	11.3496	86.6885	0.191833	16.3153	17.8394	5.02848	126.413	1.33981	7.093	16.2025	10.0193	4.11111	13.7185	1.55442	3.2523	0.224636	3.21217	0.569855	3.11075	0.124773	7.51706	1.67596	12.8668	5.6965	3.97175	139.805	343.01	360.874	149.733	381.337	33.4585	198.748	274.674	660.09	444.582	8.9396	6.69802	0.141571	178.479	0.062606	0.305815	93.8414	8.77353e-08
pos_3819	5-Methyl-2-thiouridine	25.4377	12.4223	23.9952	17.1744	27.5357	20.9147	52.3975	15.92	72.1403	36.9595	36.2369	131.039	10.7532	18.744	44.7443	36.7092	12.3111	14.8641	12.664	15.8535	36.1051	5.41662	17.3659	11.5758	18.0509	19.1418	27.3976	13.5581	9.49186	17.2591	233.783	312.781	258.918	147.025	360.241	83.1231	296.411	271.529	326.94	260.552	96.3852	83.0665	99.0335	202.097	104.255	87.3642	162.876	112.679
pos_3821	5-Hydroxymethyldeoxycytidylate	160.431	178.19	143.086	70.2044	269.014	126.967	289.28	176.469	247.824	142.501	154.832	607.892	229.36	128.606	208.444	149.885	105.966	138.125	119.272	87.6647	94.6401	69.6865	82.1721	88.6708	144.487	106.741	126.098	94.669	106.634	113.901	1500.46	1937.85	1614.49	1019.46	1796.37	497.841	1765.24	1745.88	1955.55	1585.64	535.083	482.956	549.396	1347.9	501.098	500.321	1108.59	413.614
pos_3823	5,7,3',5'-Tetrahydroxy-8,4'-dimethoxyflavone	457.999	320.912	190.469	166.354	712.041	291.883	727.904	201.072	337.032	336.316	280.746	890.871	279.897	157.073	414.307	168.315	193.945	218.115	194.513	148.752	231.076	179.133	203.649	116.337	258.257	202.232	155.374	132.828	263.09	133.749	2148.93	2617.48	2232.95	1292.75	2429.96	646.037	2576.62	2375.47	2967.52	2273.44	641.836	507.585	535.036	1705.93	459.612	384.856	1362.37	132.782
pos_3825	Glucotropaeolin	927.703	609.903	357.762	159.319	650.427	469.652	938.51	637.075	699.391	621.567	815.284	2074.31	753.01	385.668	761.765	487.855	426.557	485.401	386.601	248.925	672.931	453.972	458.309	446.59	633.589	676.481	517.81	304.26	578.667	546.437	5150.82	6284.97	5194.02	2953.47	5881.28	1446.67	6100.7	5790.27	6949.17	5244.77	1429.83	1226.21	1462.54	3848.85	1354.2	1186.28	2907.96	624.528
pos_3827	Epicatechin 3-O-(4-methylgallate)	2684.9	6080.94	3846.9	1774.1	1515.62	3281.64	551.976	4524.65	2487.69	4044.54	6011.86	17949.8	5407.87	1623.53	7177.08	3205.37	2291.66	2752.51	3685.29	1006.76	4561.58	2925.61	3812.08	4718.75	4206.9	5183.64	3296.42	3258.44	5098.6	4330.95	37166.5	47421.3	38334.3	21884.9	43121	8788.11	47314.1	43203.2	56087	41460	10171.9	8905.59	9010.55	30476.4	8559.92	7347.05	22214.3	3077.02
pos_3828	Reduced FMN	7034.12	9131.38	6729.5	6244.55	7732.12	5931.38	8832.64	5660.91	7024.98	6142.91	6780.19	11070.6	6496.53	6219.25	6787.09	5874.71	4780.98	6046.8	6034.32	5015.72	5126.96	4894.04	6162.3	6163.44	6245.58	5521.58	5264	5160.44	5585.23	5722.42	18705.9	22639.7	20177.4	12683.7	21587.8	7160.93	21842.5	20705.7	26043.7	20239.4	7319.36	7138.96	6893.96	15503.9	6181.13	5687.6	12478.1	4340.21
pos_3830	3,6-Dideoxy-3-oxo-dTDP-D-glucose	8.77353e-08	12.9077	8.77353e-08	8.77353e-08	1.91131	0.554467	8.77353e-08	6.03913	2.36964	0.641518	4.76198	76.5492	3.5892	8.77353e-08	19.6779	0.00397575	1.41772	3.33277	8.77353e-08	8.77353e-08	8.77353e-08	8.77353e-08	6.23472	8.77353e-08	1.35981	8.77353e-08	8.77353e-08	8.77353e-08	8.77353e-08	8.77353e-08	317.896	424.188	307.901	172.067	369.074	34.7611	365.062	332.794	405.762	321.719	51.7929	42.2113	46.0812	261.827	39.595	33.5314	180.316	12.783
pos_3831	gamma-L-Glutamyl-L-cysteine	109.603	190.162	80.8667	35.4291	124.527	51.95	130.266	106.061	58.7762	137.88	169.783	784.545	132.967	15.588	238.846	57.0561	20.4765	28.1303	75.3192	9.13561	75.4352	45.0035	76.3411	96.7219	64.823	107.527	36.7805	25.8445	118.205	46.9751	1694.37	2219.15	1934.11	1056.58	2148.21	427.452	2079.51	1966.29	2574.03	1953.83	418.753	368.207	346.972	1354.98	291.566	257.242	1073.88	61.2727
pos_3835	Phenylacetaldehyde	201.23	234.527	211.553	220.394	255.24	244.7	306.876	248.653	438.277	243.033	289.054	243.668	227.385	261.533	202.372	224.377	263.586	245.464	237.514	224.525	202.781	198.54	204.093	203.509	280.241	272.082	277.195	209.099	217.067	202.769	201.97	215.556	188.898	255.697	183.371	311.946	181.1	173.738	193.221	205.886	298.036	325.255	498.748	232.077	454.593	556.078	237.382	573.658
pos_3836	Phenyllactate	453.112	603.17	528.423	612.866	831.382	796.994	975.682	849.417	1781.39	812.437	936.794	773.81	716.143	884.893	541.018	707.255	890.567	852.263	697.509	660.111	611.846	637.306	652.196	557.404	786.679	763.677	991.304	607.003	514.844	548.777	819.82	894.371	673.306	980.994	758.558	1321.78	692.686	630.206	771.479	781.454	1226.41	1323.42	2268.43	993.499	2031.71	2471.83	1074.34	2627.38
pos_3838	C20911	621.136	1139.36	1067.22	1341.55	1831.93	1959.09	2241.52	2034.66	4729.13	1859.76	2199.67	1968.33	1559.77	2034.7	1135.21	1513.13	2117.18	1983.13	1602.89	1459.09	1274.14	1329.04	1464.29	1316.32	1654.76	1745.89	2421.78	1357.03	974.935	1259.89	1555.2	1797.44	981.852	2206.76	1291.06	3062.34	1360.52	1074.13	1501.53	1660.5	2850.65	3191.63	5645.27	2060.73	5460.24	6700.34	2337.5	7022.15
pos_3839	APIGENIN TRIACETATE	158.237	158.086	66.1233	93.3839	294.68	198.16	325.403	245.637	568.346	164.072	236.324	423.807	209.472	222.212	113.975	113.547	200.176	193.691	245.853	159.257	101.832	96.783	140.551	85.7682	159.508	166.351	246.327	92.9667	88.5197	55.6822	498.072	712.713	546.713	573.517	640.514	517.772	514.721	533.001	740.289	577.328	469.466	467.881	694.7	550.937	713.367	861.149	515.938	922.946
pos_3845	Apigenin 7-O-[beta-D-apiosyl-(1->2)-beta-D-glucoside]	3732.31	2929.27	2598.59	2874.23	4973.64	4414.39	4828.89	3057.55	5407.88	4154.73	4860.37	3532.4	4106.39	5288.75	1749.68	4440.8	5125.46	5693.55	2504.38	2833.24	2438.88	2840.48	2912.67	2353.86	3283.3	2572.64	3566.82	2578.4	1857.53	2018.13	8458.63	8481.06	12094.4	14733.8	9239.66	8437.27	10351.6	10963.5	11367.7	8880.05	7614.29	7111.28	4812.6	7597.99	4751.92	6067.45	7943.79	6185.11
pos_3846	Luteolin 7-O-[beta-D-glucuronosyl-(1->2)-beta-D-glucuronide]	135.295	39.9642	23.4046	56.8191	205.687	176.758	238.648	119.758	273.052	161.307	140.745	144.968	132.27	163.76	44.1233	144.181	189.321	161.492	68.2241	94.0606	51.6154	83.0852	82.3778	19.7554	95.9898	83.0148	139.527	80.8446	34.9587	1.52524	284.985	323.386	335.326	302.087	297.023	270.585	300.996	287.269	343.496	262.864	309.212	318.063	235.384	284.912	202.513	277.31	300.253	247.718
pos_3848	UDP-2,4-bis(acetamido)-2,4,6-trideoxy-beta-L-altropyranose	101.589	30.4255	26.1262	11.5925	253.492	2.40142	143.687	13.7048	797.539	80.2565	4.40376	266.499	2.34578	4.02698	37.3572	27.4428	16.651	10.6468	8.44464	13.2525	7.81812	13.827	15.6334	6.05704	5.55745	3.00879	3.73692	5.86452	7.41325	7.25174	60.8094	152.773	1621.01	364.495	308.949	639.221	318.113	113.574	655.865	35.4995	35.2199	17.7371	29.3282	52.7788	5.19413	0.125396	272.214	0.0247548
pos_3853	Catalpol	1336.86	957.702	832.046	1010.8	1666.99	1430.4	1681.76	1015.63	1471.98	1276.07	1423.62	1127.92	1246.73	1532.4	770.134	1308.25	1479.91	1644.36	943.571	999.309	901.782	983.747	1006.74	792.996	1104.92	929.561	1186.27	1024.5	829.515	764.112	2296.83	2087.95	2929.23	3206.52	2365.74	2155.55	2634.38	2575.67	2722.16	2235.45	2041.62	1945.79	1383.28	2000.96	1384.46	1615.26	2061.28	1645.24
pos_3854	Cys Ala Cys Ser	7205.14	4953.07	2392.51	4195.59	11070.1	3126.12	19195.7	1517.63	10267.4	3879.59	2350.1	3303.02	2051.84	4266.14	2667.99	3211.91	2161.69	2860.74	1805.35	3492.17	1192.85	1333.88	1730.39	1513.81	1794.76	1460.21	1409.87	1746.09	1459.13	1288.66	5291.31	5370.84	4540.29	3454.04	5391.72	3598.18	4483.06	4324.38	5451.73	4348.57	2244.99	2644.21	1947.05	3096.96	1340.64	1434.43	2723.4	1583.78
pos_3855	Tephrorianin	53795.5	25124.4	26326.7	42475.7	88934.5	98134.7	67124.8	61648.6	110708	90605.7	99316.8	72128.4	79000.5	104858	20077.9	90934.5	115150	119558	38805.8	51646	47877.6	58086.6	59295.7	32170.7	59992.7	51271.4	75442.3	51962.9	33296.9	27891.7	223490	226948	278623	298328	242541	188693	254970	296040	277004	219257	181117	171252	98894.6	223599	108232	135255	220233	146365
pos_3859	Azacitidine	310.801	285.951	245.059	296.964	477.743	507.42	400.728	353.345	496.891	490.632	573.547	391.292	505.784	657.251	129.422	478.837	608.985	695.86	280.053	307.982	235.001	277.374	365.87	254.296	367.865	238.844	409.84	266.146	139.563	233.172	1035.92	973.726	1627.39	1993	1154.79	1032.43	1286.81	1342.92	1427.81	1129.95	912.269	875.475	490.482	929.209	517.265	691.061	982.933	749.046
pos_3860	Zidovudine	486.601	600.522	349.763	491.493	569.499	628.93	451.584	796.054	1039.81	917.283	344.736	264.995	458.033	710.597	261.578	517.105	621.306	573.164	381.028	333.456	430.283	449.923	350.889	244.241	617.814	434.035	600.409	661.611	809.749	740.211	1155.74	1094.23	669.059	493.163	992.049	1008.02	1271.21	1275.27	1328.95	1192.79	542.851	579.888	927.427	1234.97	543.418	762.692	1222.14	891.473
pos_3862	Pectolinarin	3548.81	2300.45	1845.62	2573.04	4156.67	4570.14	4741.98	3734.25	5698.56	4359.35	4195.6	3571.05	4249.27	4982.66	1627.76	4110.32	4928.84	4909.82	2659.69	3273.22	2609.8	3118.78	3044.35	2001.47	3270.42	2811.42	3731.73	2952.16	2146.17	1772.16	9476.29	9013.41	9979.65	10221.1	8869.73	7555.21	9851.69	10391	10337.9	8076.07	7323.44	7270.35	4797.59	8968.78	4755.21	5942.37	8741.09	6387.28
pos_3863	S-(Hydroxymethyl)glutathione	132.969	76.0044	15.655	29.453	71.5752	18.9703	128.204	13.5169	96.6952	20.5992	1.36428	44.5337	30.4203	14.7665	39.2542	13.1475	2.31643	8.50593	20.8528	3.95572	13.7175	12.9067	24.1677	0.885652	17.5927	5.78877	17.0967	25.8245	58.0015	2.11029	367.103	511.621	785.889	292.183	928.893	183.508	412.073	384.672	357.809	475.52	177.027	87.3823	108.85	348.237	195.13	113.095	385.284	39.3864
pos_3866	HYMECROMONE METHYL ETHER	1632.37	2041.03	2302.76	2100.23	2006.72	2156.12	2101.29	1368.93	1832.87	2314.76	2153.36	2654.53	2445.05	1895.98	2434.94	2485.2	1846.72	2016.93	1701.04	2078.8	1146.81	1676.36	2786.46	1782.95	1573.07	1828.77	1650.8	2166.29	1659.71	1123.53	1530.79	1651.92	1250.8	1887.38	1673.81	2822.54	1157.14	1502.65	1656.9	1661.79	3539.14	3818.87	3531.62	1277.97	1368.34	2791.97	1425.53	3892.5
pos_3869	Neocarzinostatin chromophore	521.264	281.407	257.998	201.517	420.12	287.125	248.278	326.489	181.257	286.625	289.667	219.904	295.173	402.888	155.545	329.02	341.545	333.623	281.224	238.138	582.65	440.666	304.007	273.437	504.717	386.105	440.003	218.696	207.546	326.035	298.875	286.328	144.795	163.889	310.169	127.233	170.214	176.839	129.82	324.038	100.375	104.602	229.425	209.127	244.01	133.325	194.686	167.799
pos_3870	3-Methyluridine	175.814	163.649	170.864	178.137	556.422	107.536	521.655	77.5876	276.621	176.485	58.212	248.705	110.895	85.1119	353.985	118.375	49.858	21.6446	68.6271	29.5105	26.9069	59.2063	197.763	69.8488	51.07	36.2751	29.5562	41.3766	148.192	64.3822	384.733	323.223	352.325	523.051	481.829	611.704	382.018	222.966	606.187	432.731	589.186	615.982	572.723	277.828	296.873	418.353	442.463	553.318
pos_3871	trans-Hexadec-2-enoyl-CoA	3759.58	1289.4	829.039	1220.61	2251.99	2352.13	1215.38	2525.44	3048.18	2549.13	3042.85	1854.77	2834.43	3224.85	588.401	3176.4	2920.74	3866.51	2458.14	2728.4	3561.26	2415.56	2869.41	2477.18	4227.55	2545.33	3288.84	1545.67	2924.22	3639.68	5860.53	5904.32	5031.81	5730	5705.63	2848.84	6298.26	7542.06	6633.3	5561.57	3076.18	3068.27	2255.53	3939.66	3694.05	2696.09	3864.04	2681.05
pos_3873	Polyethylene, oxidized	1874.86	2004.16	2040.15	1762.65	1142.18	1167.77	977.693	1515.73	866.72	1163.9	1607.78	1406.73	1676.04	1522.01	1170.86	1662.24	1281.86	1567.47	1783.74	1375.26	1466.64	1374.38	1520.27	2225.83	1801.44	1502.32	1575.13	1532.88	1509.52	2289.08	970.327	889.202	1659.63	931.206	2169.78	1002.45	872.207	765.659	664.942	1059.26	740.039	729.433	1167.31	1112.44	1581.79	1022.43	1143.6	878.627
pos_3877	5-Aminopentanal	412.11	529.42	489.513	516.766	293.849	376.859	217.717	381.966	307.51	248.559	544.6	496.828	361.279	254.104	322.993	298.329	287.82	267.391	1252.24	733.491	493.14	449.68	634.256	939.98	452.596	507.719	483.609	588.951	532.338	820.067	169.029	154.479	219.785	174.054	183.695	177.987	181.486	181.22	148.165	180.328	183.502	200.719	303.582	229.409	404.317	310.886	237.161	252.851
pos_3878	3-Formyl-4,6-dihydroxy-2-methoxy-5-methylchalcone	3828.38	4129.42	3164.31	4204.68	3780.26	4023.25	3756.06	2391.69	3538.53	3452.16	3501.39	2579.85	2185.96	3163.49	3310.72	2530.79	2802.15	3031.65	2539.3	3390.66	2272.05	2888.62	3816.05	2423.13	2845.97	2447.1	3433.16	3550.94	2744.71	2287.2	2449.6	2265.68	1942.43	2367.94	2050.91	3138.82	2800.38	2858.57	3291.57	2971.16	3115.62	3697.41	3292.47	2116.9	2091.15	2768.13	2370.07	3474.91
pos_3880	Agnuside	246.319	84.2876	20.1557	142.917	629.689	306.667	239.045	18.8829	393.119	286.6	50.8468	29.5617	23.4258	46.1064	249.109	53.808	27.496	73.3029	3.14921	36.3157	29.7514	56.8472	136.541	12.3942	10.9553	16.303	99.4682	125.135	5.77609	25.6014	80.2949	75.5078	150.859	222.109	102.394	448.979	53.2801	123.941	367.842	84.8427	250.6	379.405	101.238	88.7993	0.981755	113.309	119.042	416.33
pos_3881	Porphobilinogen	582.878	625.769	433.184	607.604	645.549	425.461	868.675	271.629	602.805	411.548	336.603	186.139	128.268	389.852	402.157	176.028	249.313	292.602	221.09	434.521	68.771	295.073	413.519	113.622	270.044	191.518	358.191	383.715	188.313	108.39	390.669	341.195	361.153	346.651	387.649	418.743	473.019	454.722	492.869	327.18	343.099	396.078	371.455	323.663	119.234	230.974	260.217	308.552
pos_3882	Neobavaisoflavone	10346.8	10370.8	7793.61	11512	10176.6	10043.6	10946.1	5431.13	9878.27	8611.21	9166.44	6328.37	5129.93	7914.54	9899.67	6473.03	6935.84	8279.63	6496.05	8973.29	5999.24	7323.73	9926.85	6055.64	7095.19	6043.62	8589.62	7939.89	6887.32	5516.88	5012.16	5045.27	4295.14	5489.11	4186.85	8470.79	5474.84	5691.59	6410.22	6227.01	7550.38	9254.93	7256.51	4424.49	4404.22	6334.88	4936.26	8199.54
pos_3883	Fumiquinazoline F-indoline-2',3'-diol	2620.25	2521.15	1862.32	2467.53	2869.27	2046.88	3859.99	1292.94	2441.94	2147.85	1992.5	1515.98	1322.91	1930.78	2330.19	1707.3	1553.33	1896.46	1689.33	2083.96	1367.5	1567.8	2257.15	1477.59	1688.76	1367.99	1671.03	1808.61	1613.46	1316.06	1591.24	1444.7	1361.22	1464.09	1269.23	2261.28	2010.63	1974.96	2031.91	1981.82	1729.54	2134.05	1701.5	1424.04	1070.46	1362.77	1496.36	1923.16
pos_3885	Thr Glu Glu Cys	607.356	628.526	717.325	619.404	572.134	531.985	543.507	511.491	436.865	509.9	569.434	565.774	759.983	640.593	651.233	715.037	649.385	692.384	790.545	601.889	677.973	596.993	595.339	738.561	662.048	607.802	629.243	829.868	674.537	794.879	1149.2	1105.11	1902.4	1900.95	2059.23	1788.45	1162.95	1189.89	1097.36	1235.19	1446.18	997.818	945.627	1859.91	1011.49	1270.97	2134.74	1295.56
pos_3889	Cys Glu Glu Met	95.3867	78.1594	49.8314	76.2017	34.4387	5.5135	59.1001	53.9549	4.29902	47.8197	116.429	16.902	114.533	71.2041	1.61932	26.9409	54.4832	98.5298	96.0045	46.2382	13.888	6.20194	56.5072	49.7566	68.7377	30.6642	45.848	32.3876	38.4364	144.899	1390.12	1411.25	1847.04	731.794	4350.66	271.867	1558.94	2660.77	2253.58	998.359	0.584898	363.858	5.259	1388.57	0.649624	55.5516	2569.29	28.9667
pos_3890	Biotin sulfoxide	696.099	578.714	336.976	686.156	775.635	678.056	871.037	322.79	607.907	497.725	558.854	314.994	338.733	591.12	524.738	276.567	424.715	469.348	385.661	578.92	225.795	399.623	603.754	284.283	341.83	297.141	467.377	391.629	260.154	172.766	242.318	270.711	163.087	275.922	190.428	492.625	226.998	160.356	290.627	262.441	539.716	688.301	463.259	190.049	165.426	337.951	176.204	556.457
pos_3892	Neopterin	267.949	86.6604	76.9355	51.8781	389.685	229.203	581.514	50.684	443.738	74.3774	55.6532	31.0606	27.2346	72.777	81.8076	55.3028	38.5043	63.418	51.804	105.581	19.7598	80.3037	38.1162	26.5184	59.6624	21.8241	75.4163	36.1368	16.5849	32.0179	911.179	999.258	1798.24	1096.74	1717.25	582.834	972.487	1279.18	1370.59	801.718	431.919	439.336	205.602	1010.8	56.529	112.492	1144.39	257.178
pos_3894	Epmedin C	8974.16	8648.45	5885.08	9547.19	9565.38	9326.17	9965.49	4605.73	8518.49	6979.87	8725.96	5252.93	3908.84	6511.3	7621.04	4772.43	5602.34	6782.37	5545.22	8103.47	5013.04	6211.76	8770.13	4960.33	5670.46	4697.55	7092.31	6444.38	5388.21	4173.42	4660.25	4452.75	3042.56	4537.9	3540.5	7131.94	5387.7	4891.41	5700.47	5477.47	6786.01	8413.23	7026.66	3929.49	3641.46	5459.05	4200.46	6880.29
pos_3895	19-Chloroproansamitocin	1929.73	1834.31	1210.59	1876.05	2124.3	2059.64	2138.9	957.877	1813.14	1386.45	1881.93	1204.19	807.197	1354.53	1497.7	1001.38	1214.99	1471.44	1111.8	1659.47	1080.71	1276.85	1795	1041.78	1225.72	969.347	1516.39	1403.49	1192.71	870.282	1012.76	973.849	743.664	967.522	750.202	1561.27	1107.1	972.767	1242.72	1170.74	1478.35	1803.74	1481.39	865.274	780.126	1191.88	863.028	1497.56
pos_3898	3,2',4'-Trihydroxy-4-methoxychalcone	3590.2	4135.25	3444.03	4411.46	3556.12	3886.69	3538.3	2534.59	3151.24	3310.05	3499.03	2615.83	2392.45	3443.22	3375.45	2552.38	2849.12	3263.2	2782.94	3486.62	2369.43	2968.13	3778.97	2616.61	3208.92	2510.57	3511.19	3769.96	3099.08	2710.14	2239.63	2019.45	1819.44	2290.92	1783.77	3254.78	2527	2389.65	2904.57	2780.68	3205.13	3648.85	3301.28	1902.44	2053.42	2774.63	2252.72	3576.68
pos_3901	AminoDHQ	179.525	156.398	61.048	167.3	314.636	245.656	343.326	50.6099	228.64	164.963	60.9613	46.0848	15.4328	123.968	163.428	32.3395	57.9196	75.3596	52.2685	100.286	27.6264	68.6431	129.142	31.3003	44.48	38.6591	143.635	103.644	68.7169	26.5879	143.839	146.103	245.54	164.794	187.329	180.951	137.25	161.347	215.791	118.139	196.328	235.952	123.153	135.408	3.87825	109.952	182.323	132.265
pos_3902	Premithramycin A3	3752.4	2837.08	2490.09	2602.18	2484.29	1936.52	2419.87	2352.86	3239.63	2408.01	3380.17	2029.69	3033.17	2984.22	1578.44	2809.99	2948.36	3055.89	3263.79	3053.97	3832.64	2534.97	2638.59	3178.91	3354.24	2866.79	2978.57	2400.66	3456.86	4314.19	4985.56	4198.22	4983.17	2654.9	4395.13	2030.18	4026.3	4969.75	4305.62	3321.57	2892.89	2709.8	2490.62	3850.51	3658.27	2679.29	3544.57	2369.66
pos_3904	4-Hydroxyphenylacetylglutamic acid	3175.02	3935.86	3334.69	4039.85	3036.37	3631.91	2930.73	2549.18	2694.8	3007.82	3125.61	2441.57	2380.63	3138.85	2845.7	2355.28	2642.53	2999.16	2699.07	3168.88	2280.24	2741.49	3423.48	2414.7	2975.88	2337.88	3351.31	3566.42	3027.79	2648.96	2292.32	1834.58	1487.8	1821.83	1660.89	2392.19	2660.86	2592.09	2935.61	2677.25	2664.36	3024.19	2961.78	1743.12	1952.13	2579.37	2093.2	2931.88
pos_3906	Allocryptopine	121.876	95.2741	62.556	95.7339	92.1291	90.0025	143.595	66.6455	83.523	92.4937	70.7559	24.8308	17.0926	85.17	73.7277	17.5359	64.4694	60.4591	33.3839	78.4567	30.2976	50.6984	80.3345	0.0510376	25.0786	57.4758	83.078	58.1615	41.4287	6.98717	15.3783	10.8699	1.07048	11.3028	3.27306	42.424	14.0903	14.8444	27.5716	27.6221	63.7652	88.0005	75.6776	3.61885	26.913	54.3053	4.85312	74.5072
pos_3907	Dihydro-5-methyl-2(3H)-thiophenone	50.3262	17.4252	36.9323	18.1383	39.8406	43.5889	19.9625	36.2755	59.6852	38.2627	40.8613	46.6957	64.0365	45.1433	25.5114	58.8994	43.5797	44.0815	30.1944	30.9669	43.7662	50.4128	43.8785	30.5465	42.107	37.4027	47.7482	98.1526	39.5016	15.6889	272.457	248.045	574.49	344.681	420.376	203.668	310.835	334.35	334.015	263.034	132.171	110.591	78.8238	316.426	71.0807	78.0724	334.892	89.2878
pos_3909	1,4,5-Naphthalenetriol	3285.36	1333.44	2313.7	1558.78	2698.95	2807.5	2201.31	2229.69	3606.12	2491.03	2640.54	2904.39	3775.75	2975.61	1843.39	3566.51	2836.51	2668.44	2213.62	2269.75	2754.27	2899.13	2715.34	2145.92	2655.55	2445.63	2866.31	4771.63	2283.48	1741.27	13440.1	12591.1	27885.1	18486.4	21407.7	10266.8	16489.9	17099.8	17360.5	13471.3	6704.93	5542.8	4507.62	16578.4	3943.71	4415.46	17423.3	4917.36
pos_3917	N,N'-Bis(g-glutamyl)-3,3'-(1,2-propylenedithio)dialanine	340.084	187.42	101.016	51.6177	41.2164	18.004	72.7932	99.8986	81.9916	51.1773	55.896	51.6255	134.123	115.112	6.36781	67.9469	21.9108	51.5577	106.967	79.5543	36.223	36.0348	79.2411	35.7371	68.6151	20.6931	71.5088	68.9454	33.104	60.6449	562.204	578.032	1453.57	851.788	1074.89	418.347	672.962	709.659	753.257	525.567	148.246	88.6596	76.4923	707.301	34.7575	20.2487	699.219	65.5383
pos_3922	Dihydrosterigmatocystin	1540.66	908.446	994.152	894.198	1350.57	1205.19	1293.81	956.245	1421.33	1029.02	1135.98	1047.33	1243.07	1240.76	855.986	1174.15	1038.33	1082.6	1009.33	1052.84	991.814	1047.86	1186.8	943.133	1080.92	931.571	1161.79	1550.1	981.939	854.748	3699.66	3322.94	6385.09	4543.26	4996.71	2686.26	4247.74	4234.52	4403.36	3562.83	1878.64	1689.3	1440.92	4064.24	1269.83	1456.75	4263.67	1473.01
pos_3924	4-(3-Methylbut-2-enyl)-L-tryptophan	5160.93	4494.14	3524.62	3469.45	3952.86	4556.01	3915.39	4113.65	4818.07	4853.73	4615.96	4058.05	3886.5	4387.15	3449.98	3557.73	4965.77	4103.48	3445.31	4746.97	4283.48	4812	3726.83	3530.53	4672.28	4347.66	4324.44	3310.09	4026.46	3117.87	2146.88	2079.17	1633.46	1945.69	1780.34	3385.44	2409.39	2126.21	2317.06	1995.93	2257.35	2170.81	2690.46	1657.47	2009.89	1768.73	1556.49	1333.26
pos_3929	5,5'-Dehydrodivanillate	317.126	123.784	41.04	137.68	560.32	87.6659	734.513	47.7478	535.633	139.961	52.9516	45.4274	32.2634	85.824	50.9058	82.7956	49.2127	38.625	46.6509	87.0735	40.9237	31.4388	16.0862	28.522	30.6514	17.8546	18.1482	41.8966	17.4265	39.1278	198.988	187.025	229.573	214.19	148.617	284.978	129.316	189.589	188.311	104.804	138.732	154.797	71.3079	168.54	23.1975	49.6309	122.642	64.9682
pos_3933	3-Carboxy-1-hydroxypropyl-ThPP	631.792	1998.38	720.324	428.672	793.788	1362.62	13.3562	853.629	88.9693	1024	2353.44	4132.71	1852.32	1015.92	1080.1	1766.15	881.089	2064.9	423.506	6.86123	1162.8	735.871	563.738	660.994	1187.8	1297.43	888.941	299.308	865.721	980.724	2291.06	3845.84	2401.7	956.185	2891.8	749.272	1670.3	2080.4	2134.82	2198.86	642.396	396.604	813.923	1264.66	591.7	467.475	912.645	200.27
pos_3939	Syringin	1612.27	1262.95	909.51	592.603	1159.08	1393.46	831.483	1293.91	939.801	1423.1	1515.46	2030.66	1568.39	1284.11	1151.91	1371.75	1182.02	1299.47	1135.09	784.901	1808.83	1430.71	1165.5	922.462	1825.92	1880.48	1238.81	1011.95	1437.21	1164.28	2946.72	3218.66	3133.2	1804.19	3097.75	1725.25	3762.83	4527.02	5000.23	3374.78	1441.04	1391.32	1392.41	2594.54	1159.85	1143.26	1940.39	1007.37
pos_3940	Picroside III	470.437	325.503	123.292	398.723	638.264	451.279	674.865	88.0279	500.156	236.007	286.292	143.928	91.0288	212.683	296.994	59.0143	122.293	219.668	151.451	309.338	39.2208	197.247	306.856	61.4843	147.809	59.6953	191.604	120.53	29.479	44.5687	229.129	141.725	160.698	193.016	339.138	371.484	164.844	108.826	205.115	157.236	290.696	359.827	217.335	130.426	8.24535	116.09	125.479	250.975
pos_3941	Triphyllin B	3053.68	3147.52	2128.21	3098.26	3055.55	2635.26	3379.54	1468.39	2956.14	2138.91	2492.94	1632.51	1375	2089.28	2376.37	1599.45	1676.58	2146.06	1768.54	2442.16	1583.07	1912.69	2498.82	1613.75	1911.37	1626.67	2181.25	1961.98	1686.41	1451.27	1397.5	1269.67	956.898	1398.29	1261.55	1922.43	1418.6	1404.34	1516.97	1473.71	1700.53	2208.63	1808.87	1139.52	1190.01	1418.45	1217.63	1686.21
pos_3943	Icariin	3709.85	2552.41	1878.7	3188.96	5511.43	4814.59	2914.38	5432.57	4460.99	3497.86	4283.73	5419.32	2068.76	3066.94	3217.74	2265.92	5917.22	3551.34	7497.25	6551.18	4222.03	4357.14	6274.87	4122.91	2050.72	2217.12	4966.32	4026.53	2945.16	2355.3	2499.21	1687.81	1362.2	1686.07	678.423	3419.47	4306.82	3068.64	2425.04	2477.32	1753.15	1479.74	1447.2	1957.14	1092.49	1608.94	1503.74	1317.8
pos_3944	δ-Valerolactam	1269.97	717.1	1016.66	949.633	1185.29	648.772	1444.2	669.096	1393.86	846.399	1088.42	1140.17	1436.16	894.44	1014.3	1358.11	1125.24	885.315	1559.44	1436.09	1412.39	1345.65	1073.1	1239.62	1294.05	1331.04	870.123	1422.15	1369.04	1294.79	811.512	824.267	1669.85	1662.68	813.896	1846.95	1935.29	1587.08	1600.7	1435.79	1610.37	1092.61	1343.53	1405.23	1146	1421.55	1493.62	1848.45
pos_3945	Cycluron	30360.9	17380.5	32048.5	25527.7	30014.2	17742.1	36079.8	16492.9	36190.3	22648.7	27186.4	30495	36187	21290.3	27196.4	37147.8	28833.1	22587.9	35721.4	33300	36422.6	35083.3	27089.2	30470.2	29852	34189.7	22461.6	39889.8	32966.2	31127.6	19075.5	22047.6	40921.3	42204	19887.5	47143	43444.9	41313.1	40370.4	35987.8	43183	30327.8	32260.9	36765.6	29668.4	37194.1	36385.6	46689.4
pos_3949	Polygonolide	1189.65	1560.86	9708.38	1587.81	1565.05	1730.56	939.653	1134.39	747.993	1436.98	1363.49	3700.84	6302.03	1473.93	2044.93	4720.92	1605.08	1586.32	1192.58	1258.3	1179.31	1379.93	1477.32	1982.79	1446.75	1581.64	1587.85	7760.85	1560.2	1612.46	996.837	1425.81	2332.07	2033.3	1554.71	4113.92	877.65	1483.11	892.554	816.24	5845.79	4981.09	2416.68	985.831	2745.47	3890.43	1344.32	3721.52
pos_3952	N5-Citryl-D-ornithine	64.9874	70.852	65.6027	56.2847	105.278	75.9672	145.321	53.1311	136.363	36.2901	77.5821	61.6126	53.0644	49.0846	49.216	48.024	53.3881	57.195	65.5881	56.1106	67.5231	78.69	67.5433	50.062	56.0724	42.7811	69.8427	59.2358	50.7016	94.205	291.527	358.664	594.621	379.478	451.24	192.824	411.476	566.182	636.304	278.202	119.135	59.0152	56.6534	364.324	47.3279	82.6479	426.793	54.0694
pos_3953	L-Alanine	46.7275	29.8336	39.1542	34.5749	47.0514	23.3543	55.3377	30.0078	52.3682	31.3832	41.8752	43.6209	59.6661	36.1067	38.4596	50.4221	42.9883	35.8719	62.064	53.9013	50.7171	50.8582	38.5799	45.5566	51.0842	47.7762	35.2818	52.7095	51.7673	49.3839	34.9978	30.1239	66.0316	61.4983	30.068	71.0789	80.959	59.7779	58.5304	57.8504	61.0669	45.2927	55.6642	51.4963	40.5995	51.7203	55.96	62.1821
pos_3954	Taxa-4(20),11(12)-dien-5alpha-acetoxy-10beta-ol	4043.45	8515.39	8518.38	8114.7	3493.85	4322.85	2398.55	5835.88	2870.31	4357.28	6153.69	4964.05	6216.8	5554.63	4952.22	5724.77	5394.93	5774.23	6733.54	4700.1	5952.52	5156.39	5991.43	6843.35	6911.08	6674.88	6226.31	5566.28	7141.71	9263.76	2003.57	2014.03	1210.84	1631.13	2011.46	1419.44	1784.76	1641.61	1240.1	2130.19	1715.99	1723.58	2527.28	2002.91	3603.91	2785.7	1944.54	2043.13
pos_3956	CMP-2-aminoethylphosphonate	64.7294	165.524	53.4504	41.7442	140.672	156.742	35.0738	94.5904	6.33986	130.683	213.354	509.259	151.385	108.532	133.32	168.891	98.0682	191.835	55.4124	8.77353e-08	113.18	68.3953	53.051	81.6494	127.997	126.643	107.056	19.9382	69.8014	58.6124	640.246	969.669	598.9	223.636	670.074	263.448	463.658	513.744	690.251	485.859	157.733	109.954	249.848	406.362	116.452	142.462	227.686	77.8718
pos_3961	N-Acetylneuraminate 9-phosphate	429.027	468.725	275.4	419.953	819.229	450.477	481.935	190.255	256.36	322.347	424.382	404.519	467.758	437.043	327.355	413.778	291.34	520.17	170.049	49.6677	412.656	340.916	259.709	271.342	434.213	413.418	358.053	205.566	402.491	415.444	208.892	302.856	280.014	285.249	320.354	304.478	151.099	251.81	214.823	183.02	127.759	189.126	218.985	253.277	251.116	202.801	269.588	150.374
pos_3966	5-hexenal	48.7006	60.1361	60.5497	56.3218	31.943	33.4871	19.8472	46.2375	20.2328	30.6091	60.8206	54.8884	57.2255	53.6024	30.5286	56.8555	42.4688	49.7196	58.8743	47.3039	34.1549	34.2685	56.377	80.0027	56.964	50.5819	41.7203	61.8257	36.4731	89.2941	27.5072	18.9151	30.2385	21.7359	32.632	19.5739	38.39	20.6036	20.3959	41.346	21.9898	13.4123	22.6262	25.4228	30.1937	23.0359	26.657	21.7579
pos_3968	Dihydroactinidiolide	1618.48	3532.2	3464.64	3544.11	1515.07	1870.04	843.145	2765.34	916.96	1769.74	2406.07	1806.13	2836.48	2565.79	1550.76	2646.59	2507.95	2516.67	2269.95	1718.6	2512.48	2246.08	2134.49	2492.35	2820.88	2655.25	2746.89	2506.67	2743.08	3566.67	868.972	817.635	786.517	666.145	843.683	563.767	904.655	819.771	651.6	905.858	692.074	703.88	1089.19	919.132	1446.87	1116.23	809.659	872.345
pos_3972	Fumigaclavine C	815.971	1118.14	1110.1	971.57	680.063	606.471	587.486	777.794	530.157	655.759	803.344	722.394	921.899	789.384	770.402	884.867	671.293	749.539	846.135	691.899	804.018	707.447	730.972	993.687	916.146	767.061	751.053	801.702	826.103	998.144	569.257	540.027	510.924	468.226	605.026	465.702	562.689	516.193	424.246	515.954	431.645	423.116	515.355	563.072	651.075	520.148	550.646	439.186
pos_3974	Styrene-cis-2,3-dihydrodiol	282.594	298.942	252.446	342.27	587.663	611.315	426.198	273.137	731.965	518.246	494.943	334.699	328.579	585.776	156.008	419.557	518.949	615.026	221.093	281.38	282.205	397.587	335.19	202.013	443.318	389.103	519.331	317.686	243.744	224.064	1509.77	1410.11	1198.81	1106.76	1286.76	1637.11	1170.27	1228.78	1539.37	1140.92	925.432	890.726	1088.3	1069.79	797.741	1144.16	1122.55	1327.55
pos_3975	3-(2-Hydroxyphenyl)propanoate	615.258	671.758	550.488	911.768	1776.93	1873.76	1199.17	726.288	2352.35	1611.52	1405.97	980.186	825.807	1747.64	296.678	1152.67	1530.48	1809.46	482.242	745.77	674.844	1077.91	907.804	360.005	1174.98	1095.12	1539.13	797.138	570.457	430.474	4816.23	4668.4	3822.2	3641.12	4105.48	5285.88	3786.82	3961.38	4906.45	3633	3015.8	2876.39	3583.17	3381.93	2528.95	3599.19	3576.06	4257.83
pos_3983	alpha-D-Sedoheptulopyranose 7-phosphate	13.085	15.7402	12.7028	23.2755	57.4282	79.9611	48.9241	19.247	101.11	50.8668	39.2103	26.0554	21.5215	52.5977	2.44714	16.7988	47.4313	58.3623	13.9824	27.7244	6.99068	32.0933	16.5428	7.79	32.4452	20.9766	45.1105	15.0813	9.65474	2.89985	157.63	183.317	130.961	124.882	145.882	203.526	127.284	126.9	166.519	111.705	154.115	127.258	124.889	112.125	74.1345	148.282	125.824	161.843
pos_3987	Sibiricose A6	65.6747	139.597	83.6853	78.6578	403.486	320.883	266.591	81.5478	491.834	254.294	196.787	90.6789	129.284	290.583	27.9572	130.8	202.192	353.936	98.6529	75.3247	69.6391	91.7248	77.1244	81.7197	163.152	103.726	168.472	82.4912	56.95	87.0098	1103.54	1023.84	933.965	814.603	992.766	1290.99	840.713	777.4	1103.5	820.012	643.544	609.163	729.274	646.462	479.199	752.729	786.468	911.386
pos_3990	Premithramycin A1	288.323	206.367	99.2143	100.598	308.279	370.899	356.797	263.924	418.778	275.042	127.408	89.6831	166.723	291.612	44.2151	158.725	238.399	319.624	392.181	199.273	97.3184	59.4847	88.2869	81.9086	146.258	122.513	189.23	57.5122	111.614	75.1336	1244.66	1290.81	968.625	958.174	1056.3	1554.2	835.154	861.957	1444.7	951.585	755.819	733.087	788.445	775.975	410.212	768.472	872.301	1149.5
pos_3992	Precorrin 3B	379.005	484.148	458.477	364.082	537.694	616.974	411.887	252.805	850.3	475.443	526.754	323.396	442.685	629.685	121.177	384.584	450.842	657.757	351.868	257.526	287.666	359.605	244.785	300.423	502.583	324.363	448.53	238.766	133.032	332.434	2779.18	2718.14	2244.29	1913.1	2510.88	3940.78	1971.03	1959.14	3457.14	2166.49	1372.81	1222.24	1608.93	1526.83	948.24	1856.67	1989.13	2535.8
pos_3997	Urdamycin B	33903.8	26769.9	17443.9	38717.8	45137.3	47689.2	26774.8	42960.4	17693.8	31650.4	48082.9	37677.5	24419.2	36880.3	27560.3	28815.6	73478.4	53133.6	60961.5	30195	46907.4	53050.3	57348.5	35382.3	24067.1	27114.2	52911.1	31055.6	32933.9	32463.3	3445.31	3477.22	4464.63	6342.65	2922.06	18997.4	9756.84	5853.78	5148.68	5122.89	12411.1	10497.2	14439.5	10074.6	9141.22	14971	7798.74	10991.7
pos_3998	1,4-b-D-Xylopentaose	21590.5	4575.05	62.3853	77.9046	99.4854	26.4626	177.159	35.1105	39.8575	29.4931	42.9291	34.2156	69.6694	26.4809	23.6456	17.3072	18.1636	87.0204	70.951	40.2634	24.5928	49.4722	46.9874	30.5039	78.2088	909.844	24.9955	14.0789	20.7814	26.3399	10.8958	22.971	43.0313	152.331	638.416	165.167	37.6049	60.7659	12.5768	8.09171	33.5937	28.39	475.428	1252.24	464.159	788.473	1737.58	6.09318
pos_3999	Tetradecanoic acid	1403.87	839.857	1155.46	798.906	977.063	1104.12	535.991	1185.06	795.608	685.921	929.908	1083.54	1171.73	877.25	1232.47	1183.93	1261.67	811.12	1230.19	1041.58	1712.3	1161.73	903.58	1193.78	1390.56	1654.71	1226.15	1634.02	1674.66	1681.27	1419.81	1420.01	1217.82	1090.12	1636.07	656.09	999.785	872.063	840.33	1007.42	742.921	552.529	859.39	1294.18	1091.76	928.189	1317.22	955.31
pos_400	Sucrose 6'-phosphate	101.094	182.835	103.865	124.868	117.485	84.993	135.934	46.3818	67.7704	119.381	118.652	78.0194	51.4629	63.0801	61.8337	55.1431	95.6791	67.7615	59.555	67.9586	35.5957	50.4138	77.4364	55.2969	110.884	135.684	74.8098	63.0705	68.0644	54.5343	35.1415	29.4165	21.6826	1.31825	39.2808	10.9878	21.3732	18.3834	28.0814	15.1523	16.9884	28.9691	39.8432	8.77353e-08	7.80685	15.5649	14.2384	22.5026
pos_4002	2,4-heptadienal	105.012	99.1145	108.603	104.219	64.6457	76.4126	48.3337	100.063	37.6503	58.6677	116.841	100.291	104.542	101.608	60.2083	102.491	90.108	96.7303	114.926	89.29	85.8088	85.2014	99.7437	143.953	119.266	101.479	105.621	115.561	96.1072	170.155	48.636	41.8408	34.5599	45.2183	65.6232	31.4768	49.1943	22.9867	29.6138	83.9483	32.9432	29.7184	52.3494	37.9418	74.5938	59.6382	43.8409	50.4329
pos_4003	13,14-dihydro-15-keto-tetranor Prostaglandin D2	4118.8	4189.89	4452.65	4175.18	2779.2	3153.89	1930.2	4126.18	1856.12	2900.09	4523.11	3718.38	4313.38	3990.2	2761.89	4399.35	3539.07	4015.18	4783.93	3701.86	3424.07	3516.87	4137.7	5520.06	4469.77	4239.78	4339.54	4302.34	3577.23	6176.61	2215.85	2042.18	1376.74	1672.56	2540.38	1210.37	1960.7	1295.4	1057.51	2992.47	1458.77	1636.46	1792.24	1619.15	2728.88	2104.78	1449.91	1952.22
pos_4004	Pinolidoxin	8616.87	8226.36	8796.58	9000.75	6134.55	7993.44	4568.31	9894.4	3985.97	6590.88	9815.91	8561.73	9822.66	9632.03	6238.63	9632.15	8205.79	9191.4	11325.5	9348.33	7094.35	7935.05	9409.3	11682.3	10270.4	9712.41	10130.8	9797.31	8167.85	13523.7	5084.8	4565.67	2621.36	3756.05	5981.73	2557.73	4392.74	2037.95	1898.33	7056.07	3238.54	3711.45	4291.36	3200.07	6177.35	5139.55	3186.12	4724.19
pos_4005	trans-Zeatin riboside monophosphate	1044.75	313.345	29.1546	67.626	127.771	158.397	34.07	262.996	59.4984	356.497	42.987	249.577	51.024	51.7395	39.9623	50.5045	67.6437	40.8234	34.0663	0.901303	56.1846	15.6331	25.3599	8.77353e-08	104.31	179.797	26.7262	4.23983	119.448	0.039274	1255.78	1686.83	1819.86	480.23	1081.34	1261.44	778.988	948.219	1025.76	1134.79	276.802	203.437	504.253	426.541	243.569	243.344	462.938	127.014
pos_4007	7a-Hydroxy-O-carbamoyl-deacetylcephalosporin C	985.844	707.011	909.662	187.81	156.993	356.604	117.886	688.428	906.453	691.215	319.042	1798.45	1399.61	667.882	1318.54	1215.35	632.231	691.863	313.486	30.1468	589.298	539.6	325.07	437.39	1022.08	1196.82	804.475	926.286	915	896.739	12493.7	14131.5	10733.7	4480.77	20977.4	1877.94	15637.1	14340.7	27098.6	10005.7	4830.39	3969.97	4043.42	8337.19	3665.74	3171.64	6001.47	1889.29
pos_4008	Isomucronulatol 7-O-glucoside	28.5422	8.77353e-08	512.933	8.77353e-08	8.77353e-08	8.77353e-08	55.9715	8.77353e-08	8.77353e-08	8.77353e-08	8.77353e-08	8.77353e-08	155.687	8.77353e-08	23.8829	115.512	8.77353e-08	8.77353e-08	8.77353e-08	0.942235	8.77353e-08	8.77353e-08	8.77353e-08	8.77353e-08	8.77353e-08	8.77353e-08	8.77353e-08	762.304	8.77353e-08	8.77353e-08	8.77353e-08	10.184	10.1085	279.055	17378.2	482.121	20.8969	78.7478	8.77353e-08	8.77353e-08	8.77353e-08	8.77353e-08	101.704	8.77353e-08	213.823	8.77353e-08	8.77353e-08	8.77353e-08
pos_4009	Scolymoside	1103.06	1305.09	797.018	1092.74	1050.69	998.846	956.695	1733.41	2422.92	1288.85	1274.51	2944.14	1074.66	912.645	1626.28	901.931	1345.26	1079.59	1722.15	946.026	1239.18	1368.04	1433.79	1025.37	843.922	890.211	1375.07	1071.2	919.823	762.107	21668.4	24102.3	17237.3	7008.79	35555.7	2970.83	26188.5	25952.7	49835.1	16943.9	6517.46	5882.45	4789.53	13030.8	3091.01	4044.84	9744.54	2372.68
pos_4010	4-Guanidinobutanamide	3321.94	4313.58	4489.98	4122.79	2100.38	2493.35	1327.02	3686.17	1266.89	2313.51	4067.02	3149.03	4203.45	3701.18	2287.77	4043.6	3016.06	3460.42	4890.19	3460.87	2898.72	2806.38	3604.47	5578.44	4466.27	3683.91	3743.15	4041.95	3277.07	6287.36	1598.32	1349.57	921.958	1102.27	1692.98	810.708	1218.23	751.364	599.264	1964.43	923.578	1054.7	1527.8	1021.45	2224.72	1630.97	980.996	1334.14
pos_4014	Pimelate	357.258	371.684	387.994	373.735	274.772	298.604	229.733	401.211	176.284	282.53	446.134	356.421	434.187	378.535	269.193	386.505	347.734	399.546	527.758	387.019	366.296	342.464	444.356	514.222	466.647	414.419	454.037	412.639	346.58	596.605	214.9	195.87	146.441	147.647	235.634	126.536	183.726	118.82	116.573	238.043	177.151	171.512	202.008	156.87	248.672	208.887	144.267	199.353
pos_4017	2,4,5,7alpha-Tetrahydro-1,4,4,7a-tetramethyl-1H-inden-2-ol	579.234	594.989	582.552	574.455	552.473	522.022	673.207	544.663	634.7	497.47	545.977	501.348	564	565.642	499.198	565.354	533.339	607.413	592.358	598.166	566.745	517.773	543.601	595.703	576.85	518.628	581.859	579.425	567.946	603.237	509.545	441.341	485.112	432.439	483.611	454.765	513	449.829	432.194	496.266	464.578	510.569	446.704	463.575	494.09	490.825	472.915	531.818
pos_4019	Indolepyruvate	19.0363	28.3117	21.6386	26.1325	16.5984	19.0651	37.1564	27.2655	13.125	11.6493	25.6228	13.715	23.7087	21.9785	25.119	36.1232	22.0638	29.726	26.9457	17.9181	20.8177	23.6816	20.6392	18.9945	28.9458	28.7996	33.3507	11.6101	25.5146	29.7533	23.8928	17.1969	1496.79	129.841	533.618	374.847	57.0889	406.862	34.4641	36.8061	55.8903	8.69924	236.469	235.602	581.116	168.503	446.321	67.7782
pos_4021	trans-2-Undecenoic acid	1182.15	1252.67	1041.95	852.623	947.126	1167.61	526.164	925.183	908.351	1218.66	1353.54	1191.41	1240.29	1060.35	1045.21	1157.87	1308.44	1170.82	842.376	669.349	1400.87	1336.51	988.686	922.902	1395.76	1415.6	1125.33	888.725	1167.94	945.457	649.119	671.222	707.542	727.913	561.171	1005.26	834.539	871.266	907.194	676.984	701.185	610.732	845.596	607.11	594.25	505.166	542.136	325.83
pos_4022	Ethyl (2E,4Z,7Z)-Decatrienoate	4396.91	4547.16	4048.52	3281.2	3476.9	4296.46	2499.02	3480.8	3419.89	4215.38	4682.27	4326.54	4419.78	3909.11	4004.62	4238.09	4557.84	4246.02	3289.91	2756.39	4856.85	4655.78	3643.77	3674.35	4938.74	4883.35	4006.89	3540.46	4293.09	3754.46	2573.08	2582.62	2958.73	2938.17	2435.95	3706.79	3224.88	3346.96	3486.2	2858.96	2855.96	2551.34	3219.85	2558.81	2564.51	2275.7	2421.61	1906.94
pos_4024	Nitropolyzonamine	1135.26	1272.86	1178.59	907.909	905.503	1112.1	599.963	951.327	827.069	1095.22	1339.58	1163.87	1247.91	1071.38	1018.29	1149.61	1211.84	1164.04	936.852	756.581	1327.94	1235.02	993.531	1033.44	1377.7	1320.45	1058.26	932.097	1145.1	1073.99	675.252	659.83	729.087	741.884	627.92	946.549	836.377	817.005	846.112	727.745	677.158	623.835	813.318	641.029	644.728	553.453	612.118	444.84
pos_4027	Colnelenic acid	28378.4	30496.6	23475.2	18353.2	23691.1	30544.5	12368.1	21944.7	22415.4	31529	34680.5	30716	30241	25430.3	26533.3	27886.4	33662.6	29423.7	18624.4	13974.5	36072.4	34788.5	23523.8	19350.4	35001.9	36181.3	26673.5	19302.8	28568.5	20104.1	14374.4	15031.2	16610.6	18434	11738.5	26020.5	20165.4	21263.7	24310.8	15957.9	16727	14339.5	19685.8	13562.4	11865.1	10256.1	12418.3	6280.11
pos_4030	Cyclohexanecarboxylic acid	270.444	285.128	228.918	184.613	214.775	235.848	135.469	211.597	195.891	239.209	298.364	248.49	282.803	245.21	218.407	248.849	283.615	246.207	209.458	169.668	286.279	275.403	212.658	214.19	312.889	284.925	240.41	202.029	239.012	223.421	157.424	140.545	161.294	159.886	132.452	202.484	190.306	184.62	194.738	148.474	153.201	133.328	179.304	136.413	138.761	121.816	123.173	83.8945
pos_4035	Terpentecin	5837.35	4664.2	3160.29	3395.96	4460.75	5597.22	4375.85	4132.2	5865.19	5875.68	5482.63	4707.12	3844.51	4809.16	3802.98	3664.29	6119.84	4511.41	3009.17	5352.15	4534.33	5618.96	3935.34	3120.82	4838.97	4781.39	4811.9	3333.13	4118.8	2350.28	1895.31	1884.5	1655.41	2126.06	1568.29	4090.5	2396.04	2389.5	2857.01	1948.92	2422.78	2289.5	2770.52	1509.85	1570.15	1544.02	1480.21	1010
pos_4036	2,4-Dimethylfuran	228.117	216.489	192.622	164.519	175.128	204.317	138.036	175.241	164.223	193.817	226.416	209.497	223.027	203.435	178.412	199.194	221.598	208.184	171.013	149.521	229.685	219.741	179.717	176.207	241.656	228.778	195.376	177.723	204.521	193.778	141.989	126.491	147.018	138.761	126.887	174.729	164.059	158.31	168.06	133.593	132.791	135.252	153.984	113.081	127.182	97.5816	116.069	90.5382
pos_4039	Gly Glu Pro Cys	13.076	62.5636	5.62954	64.9969	69.7039	63.1819	23.8937	39.3022	55.4608	33.1642	64.8612	9.13389	62.9535	53.8959	6.73647	0.422471	58.8222	166.51	42.9682	38.4168	42.9455	45.2033	56.7587	31.0986	49.6286	31.8803	44.7968	23.1451	13.7578	130.275	48.233	122.254	1077.86	1026.32	677.481	762.57	208.309	150.364	449.926	520.944	770.876	634.028	91.6105	265.528	272.132	275.659	703.345	526.741
pos_4045	Plastoquinol-1	461.735	276.053	322.904	131.644	114.865	151.821	81.5454	174.062	111.793	156.424	109.71	88.1355	213.62	165.479	94.6153	158.711	101.597	133.452	153.73	114.71	178.085	133.57	112.685	132.436	152.312	347.04	342.047	275.453	111.72	166.325	94.8733	148.704	748.987	661.511	5143.48	753.486	158.112	526.181	246.158	81.9277	190.111	142.02	489.232	563.967	715.695	440.698	673.669	390.437
pos_4046	Imperialine 3-beta-D-glucoside	5335.39	3751.37	3102.25	2511.93	2509.13	3840.91	847.428	4107.08	1311.84	3751.75	3061.54	2523.21	5386.79	3364.98	2731.98	4544.58	4244.61	5351.43	4921.01	1345.1	7666.91	5672.87	3605.35	3168.2	7126.49	6123.36	5573.33	2560.58	6274.02	9122.1	1293.29	944.124	666.277	1303.72	1117.65	690.353	1106.24	1036.99	701.754	1605.28	1299.21	1389.36	1670.62	1424.81	2797.23	2110.66	1569.58	614.851
pos_4053	Copal-8-ol diphosphate	688.111	834.884	235.409	989.304	1073.19	1348.41	729.875	513.449	1044.45	1176.78	1131.39	670.09	343.296	684.997	385.778	353.945	1237.33	1027.31	610.997	1041.37	741.884	1090.86	910.411	146.018	952.564	965.126	972.39	122.453	564.135	439.564	95.0334	187.306	8.77353e-08	8.77353e-08	8.77353e-08	487.761	50.822	8.77353e-08	174.674	7.89172	131.897	344.957	311.265	6.02208	24.5858	25.0311	1.95582	16.0249
pos_4054	3-Methylbutyraldehyde oxime	120.336	121.404	114.944	113.58	126.136	129.559	142.621	123.743	129.31	114.255	125.018	126.887	124.871	138.571	112.717	122.313	121.131	133.025	115.137	121.202	98.6241	118.436	108.211	118.984	131.341	110.579	121.741	114.437	125.559	131.099	137.539	120.52	121.079	122.769	142.505	136.706	147.378	120.14	130.745	125.545	140.888	143.553	130.894	115.852	133.741	152.155	133.138	130.141
pos_4069	2-(1-Aziridinyl)ethanol	37.6178	43.5941	37.0544	40.1562	46.9911	38.4338	58.1428	40.4374	43.6813	38.136	37.5928	32.1218	40.8832	48.0495	36.5258	39.2363	40.219	32.3797	37.2982	34.8119	33.0481	37.2765	36.0556	35.9443	38.3052	42.9418	38.2085	46.9953	42.4961	39.893	53.4607	42.4623	41.4018	41.3252	44.2012	37.401	42.8889	39.9413	39.1467	39.5012	44.4812	44.5435	44.9262	40.0963	38.4644	40.636	42.573	45.0577
pos_407	2"-O-Galloylhyperin	160.832	479.424	221.384	308.417	191.682	164.974	334.648	122.141	145.531	231.872	228.605	157.032	123.92	139.178	125.273	121.334	181.53	119.959	144.893	169.477	114.524	114.064	170.376	126.329	221.205	258.762	160.104	103.384	167.894	92.016	208.362	169.89	180.282	82.2721	196.212	131.236	132.892	109.869	145.611	128.188	85.8503	98.3834	165.818	118.764	60.0507	81.7958	110.66	107.408
pos_4078	2-(6'-Methylthio)hexylmalic acid	283.988	234.841	175.025	171.068	112.562	107.464	145.812	145.999	127.364	139.366	133.816	115.329	172.228	156.615	139.348	150.985	128.976	157.995	178.661	142.789	140.155	128.884	147.607	175.717	169.112	147.194	138.081	145.776	141.904	182.075	111.916	94.5841	535.577	241.966	7340.92	355.79	127.752	429.381	94.1134	107.727	140.635	102.94	415.08	301.602	1556.39	179.049	417.841	133.473
pos_4083	Nerolidol	3265.63	3257.97	2771.2	2813.74	3614.73	3076.79	3826.54	2905.09	3151.71	2676.08	2581.4	2607.1	2831.15	3583.05	2791.89	2656.91	2988.43	2913.15	2549.88	2822.78	2840.63	2648.09	2639.14	2727.27	3062.88	2985.38	2961.6	2777.43	2942.75	2899.32	3200.96	2709.11	3014.4	2757.48	2972.21	3462.44	2746.03	2759.39	2712.28	2633.81	3386.23	3016.59	3241.36	2646.44	3302.12	3158.89	3057.32	3232.2
pos_4086	Palmitic amide	13104.7	13348.5	13922.7	14289.1	18633.9	14717.1	20882.7	14954.9	17614.4	12962.1	12936.4	11799.6	12596.3	14307	13610.8	13912.4	13442	13026.6	11500.3	13362.3	13303	13787.8	12287.8	12378.8	13293.5	14303.4	12576.1	14439.7	14918.2	12926	16932.1	17249.4	14412.4	16059.5	15428.5	14825.2	13631.8	13688.3	14701.4	14072.4	16471.1	14694	15479.2	14084.3	13547.1	14237.4	15225.7	17100.3
pos_4089	Phytosphingosine	197421	206462	215752	226150	274939	232268	301668	225850	258413	208628	207022	187463	198832	217045	214607	218170	218180	209688	187018	204238	210379	214373	200723	200129	209216	221693	204758	225025	231959	207384	246787	255085	219631	241416	235042	229657	210589	215200	229861	216975	258394	235197	232910	222892	214737	224333	238835	264752
pos_4095	16-Hydroxypalmitate	3343.28	2995.13	3077.27	2867.45	4380.62	3092.5	4651.43	3292.81	5542.7	3721.92	3094.65	2558.78	2515.58	3129.13	4229.24	3343.91	5038.07	6828.85	2500.15	3519.39	3627	3297.33	2837.98	3644.01	3769.7	2709.53	3265.42	3638.07	3266	2641.52	3881.85	3707.15	4178.27	3780.51	2619.84	4063.96	4291.68	3255.08	3287.72	3727.16	5277.58	3490.83	3557.7	4584.16	3450.84	4458.35	3820.45	5252.16
pos_4096	Dehydroascorbate	2039.48	603.518	21.5886	11.3687	9.39677	4.73936	14.7006	20.3435	16.6349	19.289	15.4294	10.4839	18.532	13.8021	8.63049	11.4351	10.3492	11.588	6.39064	9.69654	17.0425	15.1022	6.01131	16.5856	11.255	114.716	13.2156	6.08911	2.77536	10.6391	3.05762	3.98886	44.5015	41.3339	193.093	42.7652	7.78132	13.5704	1.69638	13.4655	0.440292	0.555822	168.385	215.128	266.191	35.7482	206.342	8.65814
pos_4097	5-Methoxyindoleacetate	2146.57	594.423	8.77353e-08	0.0238379	8.77353e-08	8.77353e-08	0.00652781	0.0022718	1.58403	8.77353e-08	0.142166	0.0386246	0.779783	8.77353e-08	8.77353e-08	8.77353e-08	8.77353e-08	8.77353e-08	8.77353e-08	0.0214595	8.77353e-08	8.77353e-08	8.77353e-08	8.77353e-08	8.77353e-08	114.401	8.77353e-08	8.77353e-08	8.77353e-08	8.77353e-08	8.77353e-08	8.77353e-08	27.872	50.6052	240.24	81.9861	0.433192	1.92949	8.77353e-08	8.77353e-08	0.000833618	8.77353e-08	199.479	292.795	418.875	43.734	309.384	8.77353e-08
pos_4098	(-)-trans-C75	252.157	343.281	345.22	291.395	212.644	220.35	297.143	332.424	239.932	262.799	247.434	256.724	311.994	269.952	243.399	285.116	252.196	269.291	310.23	287.848	287.905	253.618	254.017	319.235	328.007	253.37	273.081	259.908	273.279	321.124	238.188	199.284	182.62	165.392	220.431	180.263	242.251	222.952	176.689	211.389	192.34	207.755	240.037	219.187	228.563	233.418	204.295	186.876
pos_4099	Alternariol	62859.2	17437.6	332.337	23.3815	33.968	34.4306	114.687	144.098	207.187	93.9071	52.9133	28.8748	184.483	109.21	376.99	34.8094	29.9121	27.783	35.4162	42.7624	96.4353	30.6414	32.1891	34.9873	34.249	4475.64	258.262	553.71	27.5784	113.152	44.0472	76.9529	2940.67	2257.28	11593.6	3471.72	239.071	1081.98	164.75	69.4858	123.761	51.0384	6361.65	9871.68	13367.2	2304.42	9284.14	1159.08
pos_4115	cyclohexylammonium	596.724	543.229	552.856	540.788	607.651	461.252	771.071	543.7	666.108	568.941	536.227	539.979	607.107	617.784	572.989	567.951	555.956	527.405	617.11	617.241	548.496	549.638	549.848	531.961	624.365	563.763	540.751	612.193	570.563	569.658	626.734	558.161	601.191	601.999	541.092	640.414	677.857	593.199	629.294	597.57	686.347	673.751	673.26	594.564	562.477	609.928	607.188	676.958
pos_4116	6-heptenal	29925.8	26650.4	27930	29071.4	30590.9	22686	39702	26089.7	34972	29754.4	26629.3	28628.1	29559.5	28531	31191.2	29581.2	28410.7	27542	30542.6	31546.6	29354.1	30022	28323.6	27237	29847.9	28984.7	27775.6	30371.1	28677.7	28920.7	28935.4	27967.4	30172.9	31660.1	26340.1	32718.6	32622.7	30579.3	33110.3	30271.9	34858.1	34210.1	31912.1	30998.9	29010.7	31914.4	31337	34503.1
pos_4120	12-amino-octadecanoic acid	2275.15	2529.81	2625.93	2885.77	3885.36	2980.14	3844.52	2918.31	3478.32	2502.79	2612.99	2227.7	2230.17	2832.12	2549.29	2691.09	2712.32	2589.44	2291.22	2482	2719.33	2744.64	2187.8	2421.71	2557.17	2724.65	2318.94	2753.81	2957.63	2359.93	3176.95	3476.4	2725.35	3274.22	2828.97	2820.74	2715.18	2717.58	2866.13	2516.95	3376.15	2612.78	3076.41	2667.97	2554.43	2626.32	2927.61	3215.18
pos_4123	6'-Oxolividamine	4151.75	3930.91	3978.18	3891.41	2658.54	3185.27	1622.71	4407.09	1559.75	2807.75	4895.34	3961.9	4745.11	4480.88	2507.12	4712.62	3710.33	4046.53	5312.93	3937.23	3697.02	3652.42	4240.19	5775.38	5109.63	4602.62	4706.66	4339.86	3312.42	6318.89	2482.69	2078.7	1367.03	1476.74	3030.04	1048.94	2027.38	1067.86	880.565	3407.5	1150.18	1359.17	1837.55	1590.07	2731.32	2030.83	1409.4	1853.89
pos_4141	Prohydrojasmon (racemate)	12153.2	11471.3	11997.8	11862.2	12154.6	11570.6	16295.3	11933.8	13911.9	11654.8	10298.4	11161.4	11428.8	12577.7	11870.3	11871.3	10782.9	11024.8	10913.1	12015.5	10711.6	10650.2	10808.5	11365.9	11844	11345	11038.6	11814.5	11963	11990.4	12712.8	11661.8	11590.9	11941.2	12144.4	12612.2	11979.1	10797	11315	11576.6	12678.3	12969.3	12311.7	10986	10905.1	11882.3	11806.8	13910
pos_4145	Pelargonidin 3-O-beta-D-glucoside 5-O-(6-coumaroyl-beta-D-glucoside)	189.996	172.631	150.085	86.5083	156.342	103.219	129.277	51.1831	242.344	92.6956	50.5144	78.3223	128.297	131.626	22.5222	131.383	66.2598	62.8801	127.265	84.0038	78.3125	54.4676	104.643	64.0407	66.1078	49.5773	30.0113	72.776	36.5737	79.9188	1850.98	1499.94	3642.91	1566.61	2210.7	672.163	1903.65	2530	2578.96	1067.38	207.702	132.102	99.4041	1397.9	34.1984	111.729	1267.48	204.549
pos_4146	Deoxyloganin	13841.6	18112.9	9910.36	8730	7684.5	14052.6	4525.76	11528	6357.69	14670.1	19193.9	19701.3	18881.6	9593.23	9716.47	16274	12075.2	13941.6	12652.2	5571.47	21767.1	15934.2	16441.2	14030.6	16803.8	17200.5	11522.3	7794.89	16234.2	17921.7	6527.8	8162	15143.1	19079.2	6477.83	21501.6	21096.6	14809	18123	23147.3	14675.8	9143.31	15461.7	16827.1	14701.6	12169.4	16912.4	7592.72
pos_4150	2E,7-Octadienal	330.597	365.624	386.813	355.002	232.133	266.974	187.312	341.619	183.979	249.774	377.996	318.23	371.544	345.913	231.867	368.042	304.902	330.72	398.228	310.786	298.277	293.697	330.062	442.588	415.233	349.329	352.194	355.741	309.484	497.833	186.37	172.032	135.668	159.59	205.073	137.787	180.879	135.472	136.131	238.884	152.807	154.66	210.486	149.741	240.152	188.604	148.352	157.637
pos_4157	4-Isopropylphenylacetaldehyde	681.019	785.312	737.125	592.226	551.056	677.718	367.167	561.267	428.354	621.815	760.813	678.428	695.613	630.575	579.633	623.746	728.595	679.037	609.371	484.991	704.616	676.447	605.894	644	772.854	741.366	608.125	555.833	690.418	662.04	388.933	318.271	391.754	335.863	356.155	371.749	460.298	468.018	486.463	421.484	345.293	354.034	486.998	386.561	413.812	338.55	322.706	276.102
pos_4158	Norecasantalol	1815.3	2036.78	1793.44	1409.55	1670.12	2125.66	984.642	1294.23	1267.85	1943.31	2075.32	1791.43	1834.39	1643.55	1709.36	1670.22	2103.56	1813.13	1270.09	969.896	1886.13	1997.67	1570.86	1179.3	1966	2278.19	1466.02	1209.39	1787.07	1198.12	907.71	838.294	996.552	1061.25	733.024	1135.03	1125.74	1183.8	1480.21	952.037	1039.89	964.99	1265.46	776.209	736.173	716.356	683.646	484.895
pos_4161	Minoxidil	2616.75	2673.24	2389.58	2125.43	2561.69	3066.32	1910.11	1897.38	2189.52	2704.06	2586.81	2506.11	2373.73	2259.82	2436.1	2343.1	2884.11	2576.09	1752.05	1550.15	2541	2664.93	2154.53	1803.63	2534.86	2964.21	2094.86	1813.42	2532.34	1846.63	1545.97	1466.54	1664.71	1843.79	1316.16	2016.5	1736.9	1880.54	2490.67	1622.81	1878.8	1817.71	1946.99	1431.29	1340.98	1389.33	1387	1110.05
pos_4162	9,10-12,13-Diepoxyoctadecanoate	8087.43	9220.82	8310.18	6891.02	7722.65	9630.26	4644.22	6056.53	5784.47	8718.28	9328.68	8204.32	8206.98	7534.73	7785.94	7641.86	9472.47	8334.29	5945.77	4599.67	8543.38	8922	6902.73	5530.41	9036.88	10475.5	6501.06	5284.05	8204.24	5450.35	4025.27	3608.87	4536.84	4598.2	3268.85	4903.7	4837.11	4905.16	6695.59	4225.36	4597.06	4219.25	5283.1	3476.03	3039.36	3075.69	3206.01	2109.37
pos_4167	Avermectin B1b aglycone	7900.85	6909.06	5513.49	6092.93	7675.99	9006.02	7529.02	5454.17	7201.76	8248.19	7482.32	6375.21	5472.9	7333.7	5662.03	5198.15	8779.95	6638.22	4948.76	7245.33	5722.97	7410.64	5964.37	4290.57	6529.06	7239.75	5730.84	4424.11	6257.37	3395.19	2921.38	2294.43	2139.23	2691.03	2050.79	3511.73	3057.58	2845.6	3990.7	2614.22	3363.68	3576.79	4047.41	2116.99	2023.32	2244.2	1817.52	1654.23
pos_4171	3-Isopropyl-3-butenoic acid	297.695	334.762	305.112	240.605	250.355	316.379	160.458	233.12	187.349	287.908	336.002	287.94	314.508	284.824	265.715	268.629	326.376	281.841	247.646	180.879	297.675	302.26	254.49	244.805	340.567	354.481	238.608	214.474	276.056	240.17	151.239	128.673	159.826	153.906	124.759	189.633	184.665	182.55	228.277	164.599	169.365	156.672	194.241	132.326	124.285	122.976	118.865	94.4349
pos_4173	Butyl lactate	160.406	186.01	177.483	142.781	127.844	153.273	80.3796	148.109	84.9367	136.979	187.749	155.75	172.414	158.698	123.904	158.987	162.148	179.121	167.025	122.738	147.789	152.467	157.218	191.325	187.091	176.498	159.542	140.433	172.814	217.831	87.1676	64.5234	64.9757	82.398	88.3782	73.6898	86.8774	73.5546	89.4245	104.132	70.49	69.7171	93.7375	51.1366	86.6909	77.7401	56.7995	54.4275
pos_4176	17alpha-Hydroxyprogesterone	40294.4	46899.2	50637.3	48948.3	30875.4	35056.5	23734.4	44507.7	23618	33100.7	46635.6	39108.8	45139.9	43416.4	32996	46761.5	38423.1	42944.4	50400.7	42898.2	39100.2	38958.7	45391.3	55928.1	50267.3	46223.7	48081.6	46626.6	40220.4	62687.6	25464.9	24037.3	19347.3	20185.6	28984.3	16888.4	22903.2	17760.6	15470.3	30877.6	18116.7	19929	24549.8	20427.1	31661.8	26748.1	19478.8	24549.2
pos_4177	Isoandrocymbine	40.6453	27.3189	22.5448	40.1193	17.9868	3.90025	28.1185	32.4092	1.29574	4.51987	53.6509	47.4073	23.8779	27.5984	1.9779	14.2659	1.54696	14.0255	69.552	41.7041	8.15942	3.6609	54.8092	150.937	23.5567	35.838	13.0479	22.2367	8.01014	77.5822	17.1838	17.3508	8.77353e-08	0.430387	0.987553	1.1559	0.0934423	8.77353e-08	0.000164646	8.77353e-08	3.23818	8.77353e-08	0.0248513	8.77353e-08	8.88552	8.77353e-08	8.77353e-08	0.0592814
pos_4179	Phylloquinol	1067.84	1341.94	1627.75	1693.98	2287.86	1679.06	1614.27	1489.74	1789.13	1385.02	1391.61	1198.07	1102.24	1403.3	1309.07	1435.52	1546.84	1621.6	1384.76	1334.49	1654.49	1519.5	1120.34	1507.51	1369.32	1412.29	1202.83	1517.28	1591.49	1472.87	1370.78	1579.85	1327.34	1700.69	1202.13	1521.33	1401.6	1484.54	1270.3	1110.11	1769.12	1182.25	1575.74	1202.48	1154.56	1247.69	1393.2	1460.2
pos_4180	3-Methylbutanoic acid	37.6576	39.5292	33.1508	25.5394	28.7503	44.2307	17.9987	26.2539	21.3396	34.9586	37.737	37.9034	37.9486	31.9531	29.0399	26.7718	36.4368	35.2609	24.2049	19.1998	30.4156	33.2711	28.9291	26.3056	37.9614	36.9536	28.3101	21.7956	37.0507	24.8182	21.6468	15.286	19.1868	21.3064	14.0094	23.4626	25.1027	20.8735	30.3257	22.2382	21.933	20.1706	25.0219	13.2132	14.6648	13.8944	13.2751	8.66307
pos_4182	Carminomycin	235.959	49.6013	12.5268	114.494	204.883	153.044	401.975	22.601	139.807	171.632	362.126	497.065	51.0269	121.983	391.288	91.1711	145.956	158.73	99.8011	169.514	100.761	198.245	373.519	44.5543	39.3953	76.4604	68.2717	33.4083	37.5988	2.9031	483.341	604.105	493.479	185.379	495.287	393.246	14.5168	120.549	248.049	78.8177	246.883	242.691	108.872	79.2015	8.77353e-08	17.9924	84.9028	122.928
pos_4183	exo-5,6-Dimethylbicyclo[2.2.1]hept-5-en-2-ol	129.475	154.43	163.373	152.8	79.4994	109.581	35.3218	153.37	41.1134	86.3985	180.624	130.243	154.198	147.552	81.9386	147.803	118.261	145.425	195.045	145.079	111.633	121.975	161.795	251.426	174.774	165.835	166.47	177.372	132.101	295.604	68.4917	54.6008	26.3978	38.6039	90.9723	32.616	56.9172	14.5839	17.9207	84.1331	29.0373	40.9204	63.0624	39.588	99.4199	73.6072	34.3631	54.1563
pos_4185	Dinor-PGE2	7928.24	10975.5	10660.4	10582	5579.2	6789.36	3968.98	8844.36	3832.66	6115.38	9996.47	7551.2	9815.87	9308.21	5592.72	9094.04	7732.44	8407.82	11460.8	9106.85	6816.18	7189.52	9258.43	12848.3	11040.7	9135.4	9236.69	9560.45	7553.51	14030	3777.11	3286.89	2177.35	2675.23	3817.87	2352.72	3067.62	2276.04	2005.17	4211.17	2702.38	2971.81	4111.56	2618.39	5359.49	3870.97	2380.84	3379.9
pos_4187	Cholic acid (sodium)	3393.67	3171.89	2070.06	3129.32	3899.65	4778.88	3542.4	2081.55	3605.48	4142.51	3491.06	2555.71	1988.35	3168.45	2069.87	1959.3	4056.85	3073.94	1991.64	3357.68	2183.13	3116.57	2723.45	1585.02	2703.27	3256.25	2342.15	1429.78	2550.49	1089.87	734.428	568.386	246.08	671.303	345.409	1310.8	741.929	562.588	1384.24	681.395	1210.37	1549.55	1349.78	185.714	295.586	441.173	279.82	249.338
pos_4189	3-Methylcyclopentene	71.2717	78.93	69.0425	61.9933	45.3142	48.3223	30.8324	67.975	29.916	54.4747	75.2219	52.1468	78.9726	68.4255	40.5769	66.933	53.9285	61.3742	75.6785	63.9728	57.1331	60.6796	67.3417	70.8257	82.8396	73.5238	64.115	58.0174	54.2459	81.6952	40.5168	23.2351	14.7068	24.1284	30.8047	21.9066	33.7761	20.0002	25.0839	32.5488	25.6168	23.1678	32.7346	21.093	34.4192	27.9133	17.4124	19.6771
pos_4205	1,4-Cyclohexanedione	759.417	342.592	433.741	417.591	570.275	325.547	464.974	357.217	509.602	422.468	438.145	485.409	571.464	399.666	490.007	675.917	507.989	444.115	428.848	336.459	518.678	518.643	408.664	369.639	726.944	763.074	414.499	483.907	569.237	495.62	525.104	629.48	945.411	698.074	674.818	761.812	663.054	848.442	672.399	624.76	632.383	439.84	647.174	711.465	556.175	651.519	730.267	592.328
pos_4212	Ganoderic acid alpha	2525.52	2817.54	2846.65	2398.73	2350.02	1488.74	1566.64	2944.16	1399.54	1762.56	2228.05	2316.18	2338.19	2139.45	1994.49	3036.92	1833.17	2322.91	4042.49	2457.67	2838.8	2455.31	2510.21	3192.53	3098.98	2385.03	2507.96	2206.12	3749.91	4051.4	2030.68	1038.78	431.595	986.114	1021.64	648.922	978.466	717.47	413.543	1337.69	689.319	1231.48	2026.81	1787.05	1684.1	1119.94	885.503	1045.78
pos_4218	ANETHOLE	703.382	597.015	374.623	366.391	408.181	450.157	454.32	448.488	378.617	454.683	443.601	400.935	469.121	453.791	379.187	390.924	480.091	454.203	356.636	403.493	392.819	417.948	376.904	383.926	450.969	417.588	408.951	354.886	444.986	394.323	275.833	249.359	268.906	243.224	263.025	339.555	255.44	287.26	254.103	220.824	247.126	251.781	304.844	239.401	243.658	231.989	241.122	160.509
pos_4219	(±)-2-Methyl-3-(2-methylphenyl)propanal	437.678	490.638	440.305	406.094	327.043	394.785	312.96	404.917	297.791	384.552	446.995	410.462	456.925	452.519	333.706	379.63	433.672	407.828	416.568	428.331	395.778	367.129	402.857	463.721	465.747	401.075	416.605	380.791	430.958	476.209	268.118	215.342	223.724	160.991	266.874	231.059	291.225	274.621	244.859	254.37	204.777	208.97	278.915	243.635	279.883	227.092	211.003	207.758
pos_4227	3,7-Dimethyl-3Z,6-octadien-1-ol	197.097	142.574	130.122	117.002	156.378	211.736	89.6151	93.0662	122.196	193.545	162.421	155.859	120.346	114.84	151.511	117.302	169.156	146.921	100.175	61.1819	124.144	146.263	113.069	73.9368	133.028	170.05	92.2392	69.4214	131.528	62.6615	88.0154	91.8081	128.024	123.519	66.9379	150.112	124.386	123.395	234.74	134.96	116.288	109.042	112.514	78.2793	48.3653	45.4303	103.846	28.6027
pos_4228	12-OPDA	6466.18	6030.25	4990.21	4888.31	5752.48	6085.75	5916.21	5466.41	6534.25	6783.05	5895.1	5784.07	5338.49	5522.13	5519.41	5037.58	7146.86	5827.9	3919.21	5433.42	5352.93	5928.91	4450.51	4102.04	5572.02	5903.05	5355.88	4351.06	5203.02	3763.19	3129	3016.66	3031.71	3154.13	2876.23	4348.36	3307.94	3313.37	3745.86	2779.32	3077.09	3039.21	3427.43	2299.78	2306.61	2086.34	2188.46	1616.6
pos_4229	9-Hydroxy-12-oxo-10(E),15(Z)-octadecadienoic acid	38974.7	36333.2	29730.1	28260.1	34532.5	35869.6	38420.5	33768.4	38675.6	39504.3	34756.6	33307.6	32949.4	34277	32099.2	29474.1	42323.3	33437.2	23855.1	32971.1	31915.5	35323.8	26572.9	23985	34587.3	35165.4	31335.2	25527.4	30611.8	21437.4	20228.1	19294.3	19881.1	20004.4	18055.4	28790.6	20861.2	21165	24392.5	16704	19617.6	18904	21325.9	15036	14065.8	13210.6	14636.6	9765.33
pos_423	6-Carboxyhexanoyl-CoA	69.7011	80.6832	71.3248	85.0783	86.6531	82.8331	126.25	53.211	66.2816	56.6875	146.793	132.651	93.4862	82.9889	70.702	97.6651	91.6608	107.292	95.8309	105.702	70.5095	77.091	118.02	96.6626	82.798	77.5997	78.8776	75.6651	63.5198	91.8414	71.1123	109.999	71.5046	71.5139	117.254	56.0885	113.684	68.3386	102.285	83.7934	78.7473	59.3094	55.5652	56.3346	27.4194	77.4601	105.011	109.333
pos_4242	18-Hydroxyoleate	945.091	1035.41	1045.32	1004.51	997.813	888.652	1240.21	989.741	981.169	795.89	956.766	847.588	820.477	923.328	867.736	949.365	859.738	906.282	834.666	891.353	892.371	843.744	889.4	982.454	947.94	992.58	883.724	1033.85	1016.38	982.54	961.651	937.337	913.168	957.349	868.723	854.226	840.944	803.314	855.481	879.086	871.112	812.26	862.75	867.915	882.75	898.029	855.285	932.052
pos_4246	Nerol	277.947	194.786	193.806	153.459	201.235	193.773	118.781	163.651	166.676	215.374	181.428	159.146	223.438	210.358	189.454	163.431	252.002	190.011	112.483	58.3949	166.159	171.55	121.151	79.2564	165.034	149.66	106.888	73.5209	125.087	77.7211	44.1693	50.6382	47.9001	74.4138	17.5169	138.578	194.961	82.3046	151.81	53.8918	113.44	84.86	108.781	59.1075	106.874	73.9242	46.9029	12.2474
pos_4257	9Z,12Z-Linoleic acid	29.8405	98.0178	126.396	144.326	56.1148	52.7903	15.2071	75.4743	52.7657	46.2066	26.9612	52.9478	104.777	56.5263	52.5742	69.8879	94.5623	68.6642	79.1944	67.3667	86.2175	86.737	61.9501	58.107	100.848	108.632	109.088	103.461	96.7267	89.4509	75.0378	88.2691	30.1724	26.1828	52.6981	12.9257	47.5585	38.1522	32.377	13.5369	32.526	35.7815	51.0953	36.5322	45.4203	44.8327	37.5098	34.6865
[truncated: 520 more rows]
