# Supplementary material for: Integration of Metabolome and Transcriptome Reveals the Major Metabolic Pathways and Potential Biomarkers in Response to Freeze-Stress Regulation in Apple (Malus domestica)
Source: MDPI journal article supplement (doi:10.3390/metabo13080891), 2023-07-27
Supplement: s1 [file Table S3.xlsx]

## Sheet: Sheet2
Table S3. KEGG annotation of DAMs under different low temperatures.
Pathway	ko_ID	Diff_Metabolites_in_Pathway	All_metabolites_in_Pathway	Metabolite_id	KEGG_Orthology	Comparison groups
Phosphonate and phosphinate metabolism	ko00440	2	4	pos_3956;pos_1951	C05673+C17944	gg1 vs. fs1
Arachidonic acid metabolism	ko00590	2	5	pos_3178;pos_4960	C14775+C14814	gg1 vs. fs1
Cyanoamino acid metabolism	ko00460	1	2	pos_557	C00065	gg1 vs. fs1
Diterpenoid biosynthesis	ko00904	1	4	pos_3954	C11898	gg1 vs. fs1
Ubiquinone and other terpenoid-quinone biosynthesis	ko00130	1	3	pos_4992	C10793	gg1 vs. fs1
Flavone and flavonol biosynthesis	ko00944	3	7	pos_3005;pos_3486;pos_4009	C04443+C04444+C12630	gg1 vs. fs1
Isoflavonoid biosynthesis	ko00943	4	5	pos_3214;pos_2125;pos_2823;pos_2674	C12123+C19727+C00509+C01562	gg1 vs. fs1
Biosynthesis of type II polyketide products	ko01057	1	1	pos_3828	C01847	gg1 vs. fs1
Riboflavin metabolism	ko00740	1	2	pos_3828	C01847	gg1 vs. fs1
Clavulanic acid biosynthesis	ko00331	1	1	pos_1599	C06662	gg1 vs. fs1
Pantothenate and CoA biosynthesis	ko00770	1	1	pos_4471	C00750	gg1 vs. fs1
Phosphotransferase system (PTS)	ko02060	1	1	pos_2767	C02713	gg1 vs. fs1
Phenylalanine metabolism	ko00360	2	4	pos_2972;pos_3975	C00582+C01198	gg1 vs. fs1
Methane metabolism	ko00680	2	4	pos_557;pos_3863	C00065+C14180	gg1 vs. fs1
Biotin metabolism	ko00780	2	4	pos_5078;pos_4014	C01037+C02656	gg1 vs. fs1
Biosynthesis of phenylpropanoids	ko01061	1	8	pos_2823	C00509	gg1 vs. fs1
D-Amino acid metabolism	ko00470	1	3	pos_557	C00065	gg1 vs. fs1
Antifolate resistance	ko01523	1	1	pos_806	C00364	gg1 vs. fs1
Phenylpropanoid biosynthesis	ko00940	2	4	pos_1754;pos_2056	C16930+C00203	gg1 vs. fs1
Glyoxylate and dicarboxylate metabolism	ko00630	2	2	pos_557;pos_2511	C00065+C00136	gg1 vs. fs1
Glucosinolate biosynthesis	ko00966	1	2	pos_3723	C17251	gg1 vs. fs1
Biosynthesis of alkaloids derived from histidine and purine	ko01065	3	3	pos_4180;pos_2642;pos_3608	C08262+C04734+C00655	gg1 vs. fs1
Aminobenzoate degradation	ko00627	2	7	pos_855;pos_2725	C15572+C03824	gg1 vs. fs1
Mineral absorption	ko04978	1	2	pos_557	C00065	gg1 vs. fs1
Isoquinoline alkaloid biosynthesis	ko00950	2	7	pos_2335;pos_3906	C06165+C02134	gg1 vs. fs1
Sphingolipid signaling pathway	ko04071	1	1	pos_557	C00065	gg1 vs. fs1
Primary bile acid biosynthesis	ko00120	1	4	pos_5228	C05452	gg1 vs. fs1
Ovarian steroidogenesis	ko04913	1	2	pos_4176	C01176	gg1 vs. fs1
Furfural degradation	ko00365	2	3	pos_770;pos_482	C01546+C20441	gg1 vs. fs1
Valine, leucine and isoleucine degradation	ko00280	2	2	pos_2769;pos_2667	C00164+C00356	gg1 vs. fs1
Purine metabolism	ko00230	5	9	pos_2170;pos_22;pos_4654;pos_2642;pos_3608	C06194+C00366+C04751+C04734+C00655	gg1 vs. fs1
Arginine and proline metabolism	ko00330	3	7	pos_1927;pos_4010;pos_4471	C00986+C03078+C00750	gg1 vs. fs1
Carotenoid biosynthesis	ko00906	2	8	pos_4978;pos_5116	C15940+C16145	gg1 vs. fs1
Cortisol synthesis and secretion	ko04927	1	1	pos_4176	C01176	gg1 vs. fs1
Cutin, suberine and wax biosynthesis	ko00073	2	3	pos_4739;pos_4973	C19621+C19622	gg1 vs. fs1
Glutathione metabolism	ko00480	2	3	pos_3831;pos_4471	C00669+C00750	gg1 vs. fs1
Vitamin B6 metabolism	ko00750	1	2	pos_1865	C06056	gg1 vs. fs1
Carbon fixation pathways in prokaryotes	ko00720	1	2	pos_2529	C00894	gg1 vs. fs1
Ferroptosis	ko04216	2	4	pos_2667;pos_3831	C00356+C00669	gg1 vs. fs1
Biosynthesis of alkaloids derived from shikimate pathway	ko01063	1	6	pos_2335	C06165	gg1 vs. fs1
Sphingolipid metabolism	ko00600	1	1	pos_557	C00065	gg1 vs. fs1
Linoleic acid metabolism	ko00591	1	3	pos_4621	C14833	gg1 vs. fs1
Tryptophan metabolism	ko00380	5	12	pos_2138;pos_1705;pos_865;pos_2725;pos_1678	C05647+C05658+C05636+C03824+C05830	gg1 vs. fs1
Terpenoid backbone biosynthesis	ko00900	2	4	pos_2950;pos_2667	C04146+C00356	gg1 vs. fs1
Pyrimidine metabolism	ko00240	4	6	pos_806;pos_63;pos_857;pos_3141	C00364+C05822+C00363+C00239	gg1 vs. fs1
Glycerophospholipid metabolism	ko00564	1	5	pos_557	C00065	gg1 vs. fs1
Chemical carcinogenesis - reactive oxygen species	ko05208	1	2	pos_2285	C01407	gg1 vs. fs1
Zeatin biosynthesis	ko00908	1	1	pos_2197	C15604	gg1 vs. fs1
Amino sugar and nucleotide sugar metabolism	ko00520	1	2	pos_2767	C02713	gg1 vs. fs1
Two-component system	ko02020	1	1	pos_2769	C00164	gg1 vs. fs1
Biosynthesis of various antibiotics	ko00998	2	3	pos_4035;pos_557	C21093+C00065	gg1 vs. fs1
Penicillins	ko07011	1	1	pos_1599	C06662	gg1 vs. fs1
alpha-Linolenic acid metabolism	ko00592	7	9	pos_3607;pos_1124;pos_4027;pos_2297;pos_3484;pos_4228;pos_2201	C16328+C16344+C16320+C16332+C16334+C01226+C16339	gg1 vs. fs1
Propanoate metabolism	ko00640	2	2	pos_3699;pos_2529	C05983+C00894	gg1 vs. fs1
Catecholamine transferase inhibitors	ko07216	1	1	pos_2648	C15474	gg1 vs. fs1
beta-Alanine metabolism	ko00410	5	6	pos_4471;pos_2529;pos_5318;pos_1927;pos_2179	C00750+C00894+C05341+C00986+C00386	gg1 vs. fs1
Drug metabolism - cytochrome P450	ko00982	2	2	pos_3281;pos_2255	C06868+C07073	gg1 vs. fs1
Folate biosynthesis	ko00790	1	2	pos_3288	C04244	gg1 vs. fs1
Lipopolysaccharide biosynthesis	ko00540	1	1	pos_633	C04478	gg1 vs. fs1
Vancomycin resistance	ko01502	1	1	pos_557	C00065	gg1 vs. fs1
Glycine, serine and threonine metabolism	ko00260	2	3	pos_1927;pos_557	C00986+C00065	gg1 vs. fs1
Protein digestion and absorption	ko04974	3	5	pos_1877;pos_4180;pos_557	C01468+C08262+C00065	gg1 vs. fs1
Steroid hormone biosynthesis	ko00140	1	2	pos_4176	C01176	gg1 vs. fs1
Sulfur metabolism	ko00920	1	2	pos_557	C00065	gg1 vs. fs1
Butanoate metabolism	ko00650	3	5	pos_2511;pos_2769;pos_2667	C00136+C00164+C00356	gg1 vs. fs1
Stilbenoid, diarylheptanoid and gingerol biosynthesis	ko00945	1	2	pos_2056	C12208	gg1 vs. fs1
Biosynthesis of type II polyketide backbone	ko01056	1	1	pos_2511	C00136	gg1 vs. fs1
Fatty acid elongation	ko00062	3	3	pos_2339;pos_2501;pos_2511	C05268+C05270+C00136	gg1 vs. fs1
Monobactam biosynthesis	ko00261	1	3	pos_557	C00065	gg1 vs. fs1
Biosynthesis of alkaloids derived from terpenoid and polyketide	ko01066	3	3	pos_2667;pos_4246;pos_1899	C00356+C01500+C09782	gg1 vs. fs1
Taurine and hypotaurine metabolism	ko00430	1	1	pos_1602	C00606	gg1 vs. fs1
Steroid degradation	ko00984	1	1	pos_1900	C11354	gg1 vs. fs1
Monoterpenoid biosynthesis	ko00902	2	2	pos_4246;pos_1899	C01500+C09782	gg1 vs. fs1
Xylene degradation	ko00622	2	5	pos_3673;pos_1900	C07208+C11354	gg1 vs. fs1
Benzoate degradation	ko00362	2	4	pos_2285;pos_4030	C01407+C09822	gg1 vs. fs1
Tropane, piperidine and pyridine alkaloid biosynthesis	ko00960	1	3	pos_3877	C12455	gg1 vs. fs1
Biosynthesis of 12-, 14- and 16-membered macrolides	ko00522	2	6	pos_5367;pos_908	C11993+C11998	gg1 vs. fs1
Polycyclic aromatic hydrocarbon degradation	ko00624	1	1	pos_3975	C01198	gg1 vs. fs1
Caprolactam degradation	ko00930	3	4	pos_2671;pos_4355;pos_2787	C06102+C00414+C14143	gg1 vs. fs1
Biosynthesis of unsaturated fatty acids	ko01040	1	4	pos_4795	C03595	gg1 vs. fs1
Biosynthesis of various plant secondary metabolites	ko00999	3	7	pos_3975;pos_1938;pos_2012	C01198+C05158+C05838	gg1 vs. fs1
Styrene degradation	ko00643	3	4	pos_2769;pos_1854;pos_2529	C00164+C19506+C00894	gg1 vs. fs1
Toluene degradation	ko00623	3	4	pos_1877;pos_797;pos_2331	C01468+C01455+C03485	gg1 vs. fs1
Cushing syndrome	ko04934	1	1	pos_4176	C01176	gg1 vs. fs1
Biosynthesis of plant secondary metabolites	ko01060	5	14	pos_557;pos_2667;pos_4246;pos_3608;pos_2642	C00065+C00356+C01500+C00655+C04734	gg1 vs. fs1
HMG-CoA reductase inhibitors	ko07024	1	1	pos_2667	C00356	gg1 vs. fs1
Betalain biosynthesis	ko00965	1	3	pos_5670	C08543	gg1 vs. fs1
Serotonergic synapse	ko04726	1	4	pos_3178	C14775	gg1 vs. fs1
Central carbon metabolism in cancer	ko05230	1	1	pos_557	C00065	gg1 vs. fs1
Chlorocyclohexane and chlorobenzene degradation	ko00361	1	1	pos_2285	C01407	gg1 vs. fs1
Biosynthesis of various other secondary metabolites	ko00997	1	2	pos_557	C00065	gg1 vs. fs1
Steroid biosynthesis	ko00100	1	2	pos_5705	C11455	gg1 vs. fs1
ABC transporters	ko02010	2	7	pos_2735;pos_557	C05349+C00065	gg1 vs. fs1
Biosynthesis of terpenoids and steroids	ko01062	2	4	pos_2667;pos_4246	C00356+C01500	gg1 vs. fs1
Lysine degradation	ko00310	3	5	pos_3877;pos_2511;pos_2769	C12455+C00136+C00164	gg1 vs. fs1
Geraniol degradation	ko00281	1	1	pos_4246	C01500	gg1 vs. fs1
Histidine metabolism	ko00340	1	5	pos_2179	C00386	gg1 vs. fs1
Tyrosine metabolism	ko00350	2	6	pos_3561;pos_2769	C05588+C00164	gg1 vs. fs1
Ethylbenzene degradation	ko00642	2	2	pos_5258;pos_1854	C07111+C19506	gg1 vs. fs1
Drug metabolism - other enzymes	ko00983	2	2	pos_3242;pos_675	C11736+C07446	gg1 vs. fs1
Biosynthesis of plant hormones	ko01070	1	3	pos_2667	C00356	gg1 vs. fs1
Indole diterpene alkaloid biosynthesis	ko00403	2	2	pos_4453;pos_5011	C20536+C20586	gg1 vs. fs1
Cysteine and methionine metabolism	ko00270	2	5	pos_557;pos_1602	C00065+C00606	gg1 vs. fs1
C5-Branched dibasic acid metabolism	ko00660	1	1	pos_1643	C00490	gg1 vs. fs1
Staurosporine biosynthesis	ko00404	1	1	pos_3815	C20563	gg1 vs. fs1
Flavonoid biosynthesis	ko00941	5	8	pos_2479;pos_2056;pos_2823;pos_3243;pos_3214	C15525+C12208+C00509+C10028+C12123	gg1 vs. fs1
Nitrotoluene degradation	ko00633	1	1	pos_1877	C01468	gg1 vs. fs1
Porphyrin metabolism	ko00860	3	5	pos_3163;pos_594;pos_3881	C04778+C02800+C00931	gg1 vs. fs1
Bile secretion	ko04976	3	7	pos_22;pos_3860;pos_4471	C00366+C07210+C00750	gg1 vs. fs1
Fatty acid degradation	ko00071	3	3	pos_2339;pos_2501;pos_2511	C05268+C05270+C00136	gg1 vs. fs1
Aminoacyl-tRNA biosynthesis	ko00970	1	2	pos_557	C00065	gg1 vs. fs1
Streptomycin biosynthesis	ko00521	1	2	pos_972	C00413	gg1 vs. fs1
beta-Alanine metabolism	ko00410	5	6	pos_5318;pos_2179;pos_493;pos_2529;pos_1927	C05341+C00386+C02903+C00894+C00986	gg2 vs. fs2
Indole diterpene alkaloid biosynthesis	ko00403	2	2	pos_5011;pos_4453	C20586+C20536	gg2 vs. fs2
Biosynthesis of type II polyketide backbone	ko01056	1	1	pos_2511	C00136	gg2 vs. fs2
Lysine degradation	ko00310	3	5	pos_2511;pos_4502;pos_3877	C00136+C00408+C12455	gg2 vs. fs2
Steroid biosynthesis	ko00100	1	2	pos_5705	C11455	gg2 vs. fs2
Phosphonate and phosphinate metabolism	ko00440	2	4	pos_3749;pos_1951	C05674+C17944	gg2 vs. fs2
Riboflavin metabolism	ko00740	1	2	pos_3828	C01847	gg2 vs. fs2
Phenylalanine metabolism	ko00360	1	4	pos_3975	C01198	gg2 vs. fs2
Folate biosynthesis	ko00790	2	2	pos_771;pos_3288	C00251+C04244	gg2 vs. fs2
Necroptosis	ko04217	1	1	pos_5128	C00219	gg2 vs. fs2
Biosynthesis of enediyne antibiotics	ko01059	1	1	pos_771	C00251	gg2 vs. fs2
Porphyrin metabolism	ko00860	2	5	pos_3163;pos_5210	C04778+C05791	gg2 vs. fs2
Phenazine biosynthesis	ko00405	1	1	pos_771	C00251	gg2 vs. fs2
Amoebiasis	ko05146	1	1	pos_5128	C00219	gg2 vs. fs2
Glyoxylate and dicarboxylate metabolism	ko00630	2	2	pos_557;pos_2511	C00065+C00136	gg2 vs. fs2
Antifolate resistance	ko01523	1	1	pos_806	C00364	gg2 vs. fs2
Biosynthesis of alkaloids derived from shikimate pathway	ko01063	3	6	pos_771;pos_2335;pos_2490	C00251+C06165+C00643	gg2 vs. fs2
Biosynthesis of alkaloids derived from histidine and purine	ko01065	2	3	pos_3608;pos_2642	C00655+C04734	gg2 vs. fs2
Streptomycin biosynthesis	ko00521	1	2	pos_972	C00413	gg2 vs. fs2
Cutin, suberine and wax biosynthesis	ko00073	2	3	pos_4739;pos_4973	C19621+C19622	gg2 vs. fs2
Biosynthesis of various plant secondary metabolites	ko00999	3	7	pos_3412;pos_3975;pos_1032	C09315+C01198+C06972	gg2 vs. fs2
Butanoate metabolism	ko00650	1	5	pos_2511	C00136	gg2 vs. fs2
Caffeine metabolism	ko00232	1	1	pos_2806	C16361	gg2 vs. fs2
Inflammatory mediator regulation of TRP channels	ko04750	1	1	pos_5128	C00219	gg2 vs. fs2
Cyanoamino acid metabolism	ko00460	2	2	pos_3953;pos_557	C01401+C00065	gg2 vs. fs2
Sphingolipid metabolism	ko00600	1	1	pos_557	C00065	gg2 vs. fs2
Carbon fixation pathways in prokaryotes	ko00720	1	2	pos_2529	C00894	gg2 vs. fs2
Tropane, piperidine and pyridine alkaloid biosynthesis	ko00960	2	3	pos_3877;pos_4502	C12455+C00408	gg2 vs. fs2
Biosynthesis of plant hormones	ko01070	1	3	pos_771	C00251	gg2 vs. fs2
Biosynthesis of type II polyketide products	ko01057	1	1	pos_3828	C01847	gg2 vs. fs2
alpha-Linolenic acid metabolism	ko00592	5	9	pos_4228;pos_2201;pos_3607;pos_2297;pos_1124	C01226+C16339+C16328+C16332+C16344	gg2 vs. fs2
Cortisol synthesis and secretion	ko04927	1	1	pos_4176	C01176	gg2 vs. fs2
Regulation of lipolysis in adipocytes	ko04923	1	2	pos_5128	C00219	gg2 vs. fs2
ABC transporters	ko02010	3	7	pos_2735;pos_557;pos_998	C05349+C00065+C01946	gg2 vs. fs2
Fatty acid elongation	ko00062	2	3	pos_2511;pos_2339	C00136+C05268	gg2 vs. fs2
Zeatin biosynthesis	ko00908	1	1	pos_2197	C15604	gg2 vs. fs2
Aminobenzoate degradation	ko00627	6	7	pos_3181;pos_855;pos_772;pos_3184;pos_2725;pos_4205	C01984+C15572+C03824+C00261+C03824+C08063	gg2 vs. fs2
GnRH signaling pathway	ko04912	1	1	pos_5128	C00219	gg2 vs. fs2
Lipopolysaccharide biosynthesis	ko00540	1	1	pos_633	C04478	gg2 vs. fs2
Biosynthesis of alkaloids derived from terpenoid and polyketide	ko01066	1	3	pos_1899	C09782	gg2 vs. fs2
Axon regeneration	ko04361	1	1	pos_2490	C00643	gg2 vs. fs2
Biosynthesis of phenylpropanoids	ko01061	3	8	pos_2823;pos_3412;pos_771	C00509+C09315+C00251	gg2 vs. fs2
Parkinson disease	ko05012	1	3	pos_3034	C04043	gg2 vs. fs2
Purine metabolism	ko00230	5	9	pos_3608;pos_2170;pos_527;pos_807;pos_2642	C00655+C06194+C00262+C01344+C04734	gg2 vs. fs2
Primary bile acid biosynthesis	ko00120	1	4	pos_5228	C05452	gg2 vs. fs2
Biotin metabolism	ko00780	2	4	pos_4014;pos_5078	C02656+C01037	gg2 vs. fs2
Serotonergic synapse	ko04726	2	4	pos_5128;pos_2490	C00219+C00643	gg2 vs. fs2
Cushing syndrome	ko04934	1	1	pos_4176	C01176	gg2 vs. fs2
Retrograde endocannabinoid signaling	ko04723	1	1	pos_5128	C00219	gg2 vs. fs2
Arachidonic acid metabolism	ko00590	2	5	pos_4960;pos_5128	C14814+C00219	gg2 vs. fs2
Carotenoid biosynthesis	ko00906	3	8	pos_5147;pos_5116;pos_4978	C08583+C16145+C15940	gg2 vs. fs2
Biosynthesis of siderophore group nonribosomal peptides	ko01053	1	2	pos_771	C00251	gg2 vs. fs2
Aminoacyl-tRNA biosynthesis	ko00970	1	2	pos_557	C00065	gg2 vs. fs2
Drug metabolism - cytochrome P450	ko00982	2	2	pos_2255;pos_3281	C07073+C06868	gg2 vs. fs2
Biosynthesis of various alkaloids	ko00996	1	1	pos_771	C00251	gg2 vs. fs2
Biosynthesis of ansamycins	ko01051	1	1	pos_910	C12044	gg2 vs. fs2
Fatty acid degradation	ko00071	2	3	pos_2339;pos_2511	C05268+C00136	gg2 vs. fs2
Sulfur metabolism	ko00920	1	2	pos_557	C00065	gg2 vs. fs2
Arginine and proline metabolism	ko00330	3	7	pos_4010;pos_493;pos_1927	C03078+C02903+C00986	gg2 vs. fs2
Type I polyketide structures	ko01052	1	1	pos_998	C01946	gg2 vs. fs2
Drug metabolism - other enzymes	ko00983	1	2	pos_3242	C11736	gg2 vs. fs2
Styrene degradation	ko00643	2	4	pos_1854;pos_2529	C19506+C00894	gg2 vs. fs2
Long-term depression	ko04730	1	2	pos_5128	C00219	gg2 vs. fs2
Diterpenoid biosynthesis	ko00904	3	4	pos_729;pos_3954;pos_5086	C11870+C11898+C11889	gg2 vs. fs2
Histidine metabolism	ko00340	2	5	pos_3024;pos_2179	C02835+C00386	gg2 vs. fs2
Ubiquinone and other terpenoid-quinone biosynthesis	ko00130	2	3	pos_771;pos_4992	C00251+C10793	gg2 vs. fs2
Biosynthesis of unsaturated fatty acids	ko01040	2	4	pos_4795;pos_5128	C03595+C00219	gg2 vs. fs2
Steroid hormone biosynthesis	ko00140	2	2	pos_5044;pos_4176	C13713+C01176	gg2 vs. fs2
D-Amino acid metabolism	ko00470	1	3	pos_557	C00065	gg2 vs. fs2
Steroid degradation	ko00984	1	1	pos_1900	C11354	gg2 vs. fs2
Protein digestion and absorption	ko04974	1	5	pos_557	C00065	gg2 vs. fs2
Atrazine degradation	ko00791	1	1	pos_4330	C06552	gg2 vs. fs2
Flavonoid biosynthesis	ko00941	3	8	pos_2823;pos_3214;pos_2479	C00509+C12123+C15525	gg2 vs. fs2
Catecholamine transferase inhibitors	ko07216	1	1	pos_2648	C15474	gg2 vs. fs2
Phenylpropanoid biosynthesis	ko00940	1	4	pos_1754	C16930	gg2 vs. fs2
Polycyclic aromatic hydrocarbon degradation	ko00624	1	1	pos_3975	C01198	gg2 vs. fs2
Monobactam biosynthesis	ko00261	1	3	pos_557	C00065	gg2 vs. fs2
Eicosanoids	ko07034	1	2	pos_5128	C00219	gg2 vs. fs2
Cysteine and methionine metabolism	ko00270	1	5	pos_557	C00065	gg2 vs. fs2
Linoleic acid metabolism	ko00591	2	3	pos_5128;pos_4621	C00219+C14833	gg2 vs. fs2
Ascorbate and aldarate metabolism	ko00053	1	2	pos_4096	C05422	gg2 vs. fs2
Ovarian steroidogenesis	ko04913	2	2	pos_4176;pos_5128	C01176+C00219	gg2 vs. fs2
Glycine, serine and threonine metabolism	ko00260	2	3	pos_557;pos_1927	C00065+C00986	gg2 vs. fs2
Fc epsilon RI signaling pathway	ko04664	1	1	pos_5128	C00219	gg2 vs. fs2
Methane metabolism	ko00680	2	4	pos_3863;pos_557	C14180+C00065	gg2 vs. fs2
Betalain biosynthesis	ko00965	1	3	pos_5670	C08543	gg2 vs. fs2
Leishmaniasis	ko05140	1	1	pos_5128	C00219	gg2 vs. fs2
Xylene degradation	ko00622	3	5	pos_4846;pos_3673;pos_1900	C06576+C07208+C11354	gg2 vs. fs2
Nicotinate and nicotinamide metabolism	ko00760	1	4	pos_2449	C01185	gg2 vs. fs2
Glutathione metabolism	ko00480	2	3	pos_3831;pos_4096	C00669+C05422	gg2 vs. fs2
Biosynthesis of 12-, 14- and 16-membered macrolides	ko00522	5	6	pos_5329;pos_5517;pos_908;pos_998;pos_5367	C11986+C06653+C11998+C01946+C11993	gg2 vs. fs2
Biosynthesis of plant secondary metabolites	ko01060	5	14	pos_3608;pos_557;pos_2642;pos_4502;pos_771	C00655+C00065+C04734+C00408+C00251	gg2 vs. fs2
Phenylalanine, tyrosine and tryptophan biosynthesis	ko00400	1	2	pos_771	C00251	gg2 vs. fs2
Ethylbenzene degradation	ko00642	1	2	pos_1854	C19506	gg2 vs. fs2
Chemical carcinogenesis - reactive oxygen species	ko05208	1	2	pos_2285	C01407	gg2 vs. fs2
Isoflavonoid biosynthesis	ko00943	3	5	pos_2125;pos_3214;pos_2823	C19727+C12123+C00509	gg2 vs. fs2
Aldosterone synthesis and secretion	ko04925	1	2	pos_5128	C00219	gg2 vs. fs2
Biosynthesis of various antibiotics	ko00998	3	3	pos_557;pos_771;pos_4035	C00065+C00251+C21093	gg2 vs. fs2
Fc gamma R-mediated phagocytosis	ko04666	1	1	pos_5128	C00219	gg2 vs. fs2
Central carbon metabolism in cancer	ko05230	1	1	pos_557	C00065	gg2 vs. fs2
Platelet activation	ko04611	1	2	pos_5128	C00219	gg2 vs. fs2
Ferroptosis	ko04216	2	4	pos_3831;pos_5128	C00669+C00219	gg2 vs. fs2
Caprolactam degradation	ko00930	3	4	pos_4355;pos_2787;pos_2671	C00414+C14143+C06102	gg2 vs. fs2
Monoterpenoid biosynthesis	ko00902	1	2	pos_1899	C09782	gg2 vs. fs2
Tryptophan metabolism	ko00380	5	12	pos_865;pos_772;pos_2490;pos_2138;pos_2725	C05636+C03824+C00643+C05647+C03824	gg2 vs. fs2
Isoquinoline alkaloid biosynthesis	ko00950	2	7	pos_3034;pos_2335	C04043+C06165	gg2 vs. fs2
Glycerophospholipid metabolism	ko00564	1	5	pos_557	C00065	gg2 vs. fs2
Vascular smooth muscle contraction	ko04270	1	2	pos_5128	C00219	gg2 vs. fs2
Chlorocyclohexane and chlorobenzene degradation	ko00361	1	1	pos_2285	C01407	gg2 vs. fs2
Toluene degradation	ko00623	3	4	pos_2331;pos_3184;pos_797	C03485+C00261+C01455	gg2 vs. fs2
Vancomycin resistance	ko01502	1	1	pos_557	C00065	gg2 vs. fs2
Flavone and flavonol biosynthesis	ko00944	1	7	pos_4009	C12630	gg2 vs. fs2
Tyrosine metabolism	ko00350	2	6	pos_3561;pos_3034	C05588+C04043	gg2 vs. fs2
Oxytocin signaling pathway	ko04921	1	2	pos_5128	C00219	gg2 vs. fs2
Propanoate metabolism	ko00640	2	2	pos_2529;pos_3699	C00894+C05983	gg2 vs. fs2
Biosynthesis of various other secondary metabolites	ko00997	2	2	pos_771;pos_557	C00251+C00065	gg2 vs. fs2
Biosynthesis of alkaloids derived from ornithine, lysine and nicotinic acid	ko01064	1	1	pos_4502	C00408	gg2 vs. fs2
Sphingolipid signaling pathway	ko04071	1	1	pos_557	C00065	gg2 vs. fs2
C5-Branched dibasic acid metabolism	ko00660	1	1	pos_1643	C00490	gg2 vs. fs2
Benzoate degradation	ko00362	1	4	pos_2285	C01407	gg2 vs. fs2
Furfural degradation	ko00365	1	3	pos_482	C20441	gg2 vs. fs2
Pyrimidine metabolism	ko00240	2	6	pos_806;pos_3141	C00364+C00239	gg2 vs. fs2
Phototransduction - fly	ko04745	1	1	pos_5128	C00219	gg2 vs. fs2
Mineral absorption	ko04978	1	2	pos_557	C00065	gg2 vs. fs2
Isoquinoline alkaloid biosynthesis	ko00950	1	7	pos_5249	C08526	gg3 vs. fs3
Porphyrin metabolism	ko00860	2	5	pos_5210;pos_594	C05791+C02800	gg3 vs. fs3
Ascorbate and aldarate metabolism	ko00053	2	2	pos_2013;pos_4096	C00818+C05422	gg3 vs. fs3
Biosynthesis of alkaloids derived from histidine and purine	ko01065	3	3	pos_2642;pos_4180;pos_3608	C04734+C08262+C00655	gg3 vs. fs3
Carotenoid biosynthesis	ko00906	2	8	pos_1281;pos_4978	C15935+C15940	gg3 vs. fs3
Glyoxylate and dicarboxylate metabolism	ko00630	2	2	pos_2511;pos_557	C00136+C00065	gg3 vs. fs3
Toluene degradation	ko00623	3	4	pos_2331;pos_797;pos_3184	C03485+C01455+C00261	gg3 vs. fs3
Caprolactam degradation	ko00930	3	4	pos_4355;pos_2671;pos_1203	C00414+C06102+C06104	gg3 vs. fs3
Fatty acid biosynthesis	ko00061	1	2	pos_4650	C08362	gg3 vs. fs3
Biosynthesis of various other secondary metabolites	ko00997	2	2	pos_557;pos_771	C00065+C00251	gg3 vs. fs3
Nicotinate and nicotinamide metabolism	ko00760	2	4	pos_2449;pos_1916	C01185+C05380	gg3 vs. fs3
Sphingolipid metabolism	ko00600	1	1	pos_557	C00065	gg3 vs. fs3
Vitamin B6 metabolism	ko00750	1	2	pos_1865	C06056	gg3 vs. fs3
Fatty acid degradation	ko00071	2	3	pos_2501;pos_2511	C05270+C00136	gg3 vs. fs3
Tryptophan metabolism	ko00380	3	12	pos_4097;pos_4019;pos_865	C05660+C00331+C05636	gg3 vs. fs3
Phenylalanine metabolism	ko00360	1	4	pos_3975	C01198	gg3 vs. fs3
Biosynthesis of alkaloids derived from shikimate pathway	ko01063	3	6	pos_3501;pos_5249;pos_771	C02637+C08526+C00251	gg3 vs. fs3
Biosynthesis of type II polyketide backbone	ko01056	1	1	pos_2511	C00136	gg3 vs. fs3
Ovarian steroidogenesis	ko04913	1	2	pos_4176	C01176	gg3 vs. fs3
Central carbon metabolism in cancer	ko05230	1	1	pos_557	C00065	gg3 vs. fs3
Monobactam biosynthesis	ko00261	1	3	pos_557	C00065	gg3 vs. fs3
ABC transporters	ko02010	2	7	pos_557;pos_2735	C00065+C05349	gg3 vs. fs3
Bile secretion	ko04976	1	7	pos_3860	C07210	gg3 vs. fs3
Lipopolysaccharide biosynthesis	ko00540	1	1	pos_633	C04478	gg3 vs. fs3
Biosynthesis of various plant secondary metabolites	ko00999	4	7	pos_1938;pos_3501;pos_2012;pos_3975	C05158+C02637+C05838+C01198	gg3 vs. fs3
alpha-Linolenic acid metabolism	ko00592	4	9	pos_4228;pos_4027;pos_1124;pos_3484	C01226+C16320+C16344+C16334	gg3 vs. fs3
Biosynthesis of 12-, 14- and 16-membered macrolides	ko00522	3	6	pos_5367;pos_5329;pos_908	C11993+C11986+C11998	gg3 vs. fs3
Geraniol degradation	ko00281	1	1	pos_4246	C01500	gg3 vs. fs3
Cushing syndrome	ko04934	1	1	pos_4176	C01176	gg3 vs. fs3
Steroid hormone biosynthesis	ko00140	2	2	pos_5044;pos_4176	C13713+C01176	gg3 vs. fs3
Glycine, serine and threonine metabolism	ko00260	2	3	pos_557;pos_1927	C00065+C00986	gg3 vs. fs3
Vancomycin resistance	ko01502	1	1	pos_557	C00065	gg3 vs. fs3
Sphingolipid signaling pathway	ko04071	1	1	pos_557	C00065	gg3 vs. fs3
Monoterpenoid biosynthesis	ko00902	1	2	pos_4246	C01500	gg3 vs. fs3
Flavonoid biosynthesis	ko00941	4	8	pos_3214;pos_2014;pos_2056;pos_3243	C12123+C06562+C12208+C10028	gg3 vs. fs3
Cutin, suberine and wax biosynthesis	ko00073	2	3	pos_4973;pos_4739	C19622+C19621	gg3 vs. fs3
Catecholamine transferase inhibitors	ko07216	1	1	pos_2648	C15474	gg3 vs. fs3
Primary bile acid biosynthesis	ko00120	1	4	pos_5228	C05452	gg3 vs. fs3
Ubiquinone and other terpenoid-quinone biosynthesis	ko00130	1	3	pos_771	C00251	gg3 vs. fs3
Folate biosynthesis	ko00790	1	2	pos_771	C00251	gg3 vs. fs3
Mineral absorption	ko04978	1	2	pos_557	C00065	gg3 vs. fs3
Aminobenzoate degradation	ko00627	2	7	pos_3181;pos_3184	C01984+C00261	gg3 vs. fs3
Aminoacyl-tRNA biosynthesis	ko00970	1	2	pos_557	C00065	gg3 vs. fs3
Drug metabolism - other enzymes	ko00983	1	2	pos_675	C07446	gg3 vs. fs3
Betalain biosynthesis	ko00965	2	3	pos_5670;pos_4904	C08543+C17755	gg3 vs. fs3
Biotin metabolism	ko00780	2	4	pos_5078;pos_4014	C01037+C02656	gg3 vs. fs3
Cyanoamino acid metabolism	ko00460	1	2	pos_557	C00065	gg3 vs. fs3
Biosynthesis of siderophore group nonribosomal peptides	ko01053	2	2	pos_3501;pos_771	C02637+C00251	gg3 vs. fs3
Biosynthesis of terpenoids and steroids	ko01062	1	4	pos_4246	C01500	gg3 vs. fs3
Lysine degradation	ko00310	1	5	pos_2511	C00136	gg3 vs. fs3
Furfural degradation	ko00365	3	3	pos_482;pos_2748;pos_770	C20441+C14279+C01546	gg3 vs. fs3
Arginine and proline metabolism	ko00330	3	7	pos_493;pos_4010;pos_1927	C02903+C03078+C00986	gg3 vs. fs3
Biosynthesis of phenylpropanoids	ko01061	4	8	pos_2014;pos_3501;pos_771;pos_1731	C06562+C02637+C00251+C00858	gg3 vs. fs3
Taurine and hypotaurine metabolism	ko00430	1	1	pos_1602	C00606	gg3 vs. fs3
PPAR signaling pathway	ko03320	1	1	pos_4678	C14767	gg3 vs. fs3
Benzoate degradation	ko00362	2	4	pos_2285;pos_4030	C01407+C09822	gg3 vs. fs3
Biosynthesis of plant secondary metabolites	ko01060	6	14	pos_557;pos_3501;pos_4246;pos_2642;pos_3608;pos_771	C00065+C02637+C01500+C04734+C00655+C00251	gg3 vs. fs3
Glutathione metabolism	ko00480	1	3	pos_4096	C05422	gg3 vs. fs3
Biosynthesis of alkaloids derived from terpenoid and polyketide	ko01066	1	3	pos_4246	C01500	gg3 vs. fs3
Linoleic acid metabolism	ko00591	2	3	pos_4621;pos_4678	C14833+C14767	gg3 vs. fs3
Fatty acid elongation	ko00062	2	3	pos_2501;pos_2511	C05270+C00136	gg3 vs. fs3
D-Amino acid metabolism	ko00470	1	3	pos_557	C00065	gg3 vs. fs3
Histidine metabolism	ko00340	1	5	pos_2179	C00386	gg3 vs. fs3
Methane metabolism	ko00680	3	4	pos_3863;pos_557;pos_3496	C14180+C00065+C04732	gg3 vs. fs3
Flavone and flavonol biosynthesis	ko00944	1	7	pos_4009	C12630	gg3 vs. fs3
Diterpenoid biosynthesis	ko00904	1	4	pos_3954	C11898	gg3 vs. fs3
Chemical carcinogenesis - reactive oxygen species	ko05208	1	2	pos_2285	C01407	gg3 vs. fs3
Biosynthesis of ansamycins	ko01051	1	1	pos_910	C12044	gg3 vs. fs3
Chlorocyclohexane and chlorobenzene degradation	ko00361	1	1	pos_2285	C01407	gg3 vs. fs3
Butanoate metabolism	ko00650	1	5	pos_2511	C00136	gg3 vs. fs3
Glycerophospholipid metabolism	ko00564	2	5	pos_5408;pos_557	C06771+C00065	gg3 vs. fs3
Purine metabolism	ko00230	3	9	pos_3608;pos_2642;pos_4654	C00655+C04734+C04751	gg3 vs. fs3
Phenazine biosynthesis	ko00405	1	1	pos_771	C00251	gg3 vs. fs3
Polycyclic aromatic hydrocarbon degradation	ko00624	1	1	pos_3975	C01198	gg3 vs. fs3
Biosynthesis of various antibiotics	ko00998	3	3	pos_4035;pos_557;pos_771	C21093+C00065+C00251	gg3 vs. fs3
Pyrimidine metabolism	ko00240	1	6	pos_63	C05822	gg3 vs. fs3
Biosynthesis of plant hormones	ko01070	1	3	pos_771	C00251	gg3 vs. fs3
Propanoate metabolism	ko00640	1	2	pos_3699	C05983	gg3 vs. fs3
Biosynthesis of enediyne antibiotics	ko01059	1	1	pos_771	C00251	gg3 vs. fs3
Isoflavonoid biosynthesis	ko00943	3	5	pos_2674;pos_3214;pos_1731	C01562+C12123+C00858	gg3 vs. fs3
Cortisol synthesis and secretion	ko04927	1	1	pos_4176	C01176	gg3 vs. fs3
Phosphonate and phosphinate metabolism	ko00440	2	4	pos_3749;pos_1951	C05674+C17944	gg3 vs. fs3
beta-Alanine metabolism	ko00410	4	6	pos_2179;pos_5318;pos_493;pos_1927	C00386+C05341+C02903+C00986	gg3 vs. fs3
C5-Branched dibasic acid metabolism	ko00660	1	1	pos_1643	C00490	gg3 vs. fs3
Steroid biosynthesis	ko00100	1	2	pos_5705	C11455	gg3 vs. fs3
Phenylalanine, tyrosine and tryptophan biosynthesis	ko00400	2	2	pos_3501;pos_771	C02637+C00251	gg3 vs. fs3
Biosynthesis of various alkaloids	ko00996	1	1	pos_771	C00251	gg3 vs. fs3
Protein digestion and absorption	ko04974	2	5	pos_4180;pos_557	C08262+C00065	gg3 vs. fs3
Biosynthesis of unsaturated fatty acids	ko01040	2	4	pos_4795;pos_4695	C03595+C06428	gg3 vs. fs3
Photosynthesis	ko00195	1	1	pos_4045	C16693	gg3 vs. fs3
Indole diterpene alkaloid biosynthesis	ko00403	1	2	pos_4453	C20536	gg3 vs. fs3
Parkinson disease	ko05012	1	3	pos_4904	C17755	gg3 vs. fs3
Drug metabolism - cytochrome P450	ko00982	2	2	pos_3281;pos_2255	C06868+C07073	gg3 vs. fs3
Phenylpropanoid biosynthesis	ko00940	2	4	pos_2056;pos_1754	C12208+C16930	gg3 vs. fs3
Sulfur metabolism	ko00920	1	2	pos_557	C00065	gg3 vs. fs3
Staurosporine biosynthesis	ko00404	1	1	pos_3815	C20563	gg3 vs. fs3
Xylene degradation	ko00622	2	5	pos_5394;pos_3673	C06756+C07208	gg3 vs. fs3
Retinol metabolism	ko00830	1	3	pos_4697	C16681	gg3 vs. fs3
Stilbenoid, diarylheptanoid and gingerol biosynthesis	ko00945	1	2	pos_2056	C12208	gg3 vs. fs3
Arachidonic acid metabolism	ko00590	1	5	pos_4960	C14814	gg3 vs. fs3
Tyrosine metabolism	ko00350	1	6	pos_3561	C05588	gg3 vs. fs3
Riboflavin metabolism	ko00740	1	2	pos_3496	C04732	gg3 vs. fs3
Cysteine and methionine metabolism	ko00270	2	5	pos_557;pos_1602	C00065+C00606	gg3 vs. fs3
