# Supplementary material for: Integration of Metabolome and Transcriptome Reveals the Major Metabolic Pathways and Potential Biomarkers in Response to Freeze-Stress Regulation in Apple (Malus domestica)
Source: MDPI journal article supplement (doi:10.3390/metabo13080891), 2023-07-27
Supplement: s1 [file Table S4.xlsx]

## Sheet: Sheet1
Table S4. KEGG annotations of metabolites with the same trend.
ID	Name	KEGG_annotation	KEGG_pathway_annotation
pos_3461	#N/A	#N/A	#N/A
pos_5640	#N/A	#N/A	#N/A
pos_3460	#N/A	#N/A	#N/A
pos_4791	#N/A	#N/A	#N/A
pos_5641	#N/A	#N/A	#N/A
pos_5642	#N/A	#N/A	#N/A
pos_5402	1,2,4,5-Tetramethylbenzene	C14534	--
pos_5644	#N/A	#N/A	#N/A
pos_4558	#N/A	#N/A	#N/A
pos_2135	3-O-Feruloylquinic acid	C02572	--
pos_3466	#N/A	#N/A	#N/A
pos_4313	#N/A	#N/A	#N/A
pos_4555	#N/A	#N/A	#N/A
pos_4311	#N/A	#N/A	#N/A
pos_4795	8,11,14-Eicosatrienoyl-CoA	C03595	Biosynthesis of unsaturated fatty acids(ko01040);;Fatty acid metabolism(ko01212)
pos_1284	#N/A	#N/A	#N/A
pos_2131	#N/A	#N/A	#N/A
pos_4319	#N/A	#N/A	#N/A
pos_4318	#N/A	#N/A	#N/A
pos_3228	#N/A	#N/A	#N/A
pos_4559	#N/A	#N/A	#N/A
pos_5632	#N/A	#N/A	#N/A
pos_5635	#N/A	#N/A	#N/A
pos_1037	#N/A	#N/A	#N/A
pos_865	3-Hydroxykynurenamine	C05636	Tryptophan metabolism(ko00380)
pos_3699	Propionyladenylate	C05983	Propanoate metabolism(ko00640)
pos_4304	#N/A	#N/A	#N/A
pos_4546	#N/A	#N/A	#N/A
pos_4303	#N/A	#N/A	#N/A
pos_4302	#N/A	#N/A	#N/A
pos_4544	#N/A	#N/A	#N/A
pos_4786	N-Phenyl-1-naphthylamine	C14405	--
pos_2362	Butein	C08578	Flavonoid biosynthesis(ko00941)
pos_3210	#N/A	#N/A	#N/A
pos_863	#N/A	#N/A	#N/A
pos_4308	#N/A	#N/A	#N/A
pos_4549	#N/A	#N/A	#N/A
pos_5638	#N/A	#N/A	#N/A
pos_2357	#N/A	#N/A	#N/A
pos_2599	Anthragallol	C10297	--
pos_1269	#N/A	#N/A	#N/A
pos_3445	#N/A	#N/A	#N/A
pos_4533	#N/A	#N/A	#N/A
pos_3201	#N/A	#N/A	#N/A
pos_1028	#N/A	#N/A	#N/A
pos_4537	#N/A	#N/A	#N/A
pos_5626	4-Methylene-L-glutamate	C00651	--
pos_5629	#N/A	#N/A	#N/A
pos_2584	#N/A	#N/A	#N/A
pos_2585	#N/A	#N/A	#N/A
pos_2583	Oxaloglutarate	C05533	2-Oxocarboxylic acid metabolism(ko01210)
pos_2109	#N/A	#N/A	#N/A
pos_4527	#N/A	#N/A	#N/A
pos_4526	#N/A	#N/A	#N/A
pos_5619	5-Hydroxy-N-formylkynurenine	C05648	--
pos_2570	#N/A	#N/A	#N/A
pos_4756	#N/A	#N/A	#N/A
pos_4753	#N/A	#N/A	#N/A
pos_2331	Benzyl alcohol	C03485	Toluene degradation(ko00623);;Metabolic pathways(ko01100);;Microbial metabolism in diverse environments(ko01120);;Degradation of aromatic compounds(ko01220)
pos_2573	#N/A	#N/A	#N/A
pos_4992	Geranylhydroquinone	C10793	Ubiquinone and other terpenoid-quinone biosynthesis(ko00130);;Biosynthesis of secondary metabolites(ko01110)
pos_3414	5-Hydroxyconiferaldehyde	C12204	Phenylpropanoid biosynthesis(ko00940);;Biosynthesis of phenylpropanoids(ko01061);;Metabolic pathways(ko01100);;Biosynthesis of secondary metabolites(ko01110)
pos_821	#N/A	#N/A	#N/A
pos_3412	Umbelliferone	C09315	Biosynthesis of various plant secondary metabolites(ko00999);;Biosynthesis of phenylpropanoids(ko01061);;Biosynthesis of secondary metabolites(ko01110)
pos_3411	2-Hydroxyphenylacetate	C05852	Phenylalanine metabolism(ko00360);;Styrene degradation(ko00643);;Metabolic pathways(ko01100);;Microbial metabolism in diverse environments(ko01120)
pos_4983	#N/A	#N/A	#N/A
pos_4740	#N/A	#N/A	#N/A
pos_2560	#N/A	#N/A	#N/A
pos_4981	#N/A	#N/A	#N/A
pos_4508	3alpha,7alpha,12alpha-Trihydroxy-5beta-cholestanoate	C04722	--
pos_3418	#N/A	#N/A	#N/A
pos_3417	#N/A	#N/A	#N/A
pos_4748	#N/A	#N/A	#N/A
pos_3658	#N/A	#N/A	#N/A
pos_3415	#N/A	#N/A	#N/A
pos_3403	#N/A	#N/A	#N/A
pos_2314	Dihydrosanguinarine	C05191	Isoquinoline alkaloid biosynthesis(ko00950);;Metabolic pathways(ko01100);;Biosynthesis of secondary metabolites(ko01110)
pos_2553	#N/A	#N/A	#N/A
pos_4973	9,10-Dihydroxystearate	C19622	Cutin, suberine and wax biosynthesis(ko00073)
pos_4730	#N/A	#N/A	#N/A
pos_4739	9,10,18-Trihydroxystearate	C19621	Cutin, suberine and wax biosynthesis(ko00073)
pos_4723	#N/A	#N/A	#N/A
pos_3633	#N/A	#N/A	#N/A
pos_4963	#N/A	#N/A	#N/A
pos_3630	#N/A	#N/A	#N/A
pos_1210	beta-Tocotrienol	C14154	--
pos_847	#N/A	#N/A	#N/A
pos_4726	#N/A	#N/A	#N/A
pos_3877	5-Aminopentanal	C12455	Lysine degradation(ko00310);;Tropane, piperidine and pyridine alkaloid biosynthesis(ko00960);;Metabolic pathways(ko01100);;Biosynthesis of secondary metabolites(ko01110);;Microbial metabolism in diverse environments(ko01120)
pos_4724	#N/A	#N/A	#N/A
pos_4966	#N/A	#N/A	#N/A
pos_479	#N/A	#N/A	#N/A
pos_4717	#N/A	#N/A	#N/A
pos_3625	Scytalone	C00779	--
pos_469	(R)-Mevalonate	C00418	Terpenoid backbone biosynthesis(ko00900);;Biosynthesis of plant secondary metabolites(ko01060);;Biosynthesis of terpenoids and steroids(ko01062);;Biosynthesis of plant hormones(ko01070);;Metabolic pathways(ko01100);;Biosynthesis of secondary metabolites(ko01110);;Ferroptosis(ko04216)
pos_3610	N-Formyl-L-glutamate	C01045	Histidine metabolism(ko00340);;Metabolic pathways(ko01100)
pos_4709	#N/A	#N/A	#N/A
pos_3619	3-Oxododecanoyl-CoA	C05263	--
pos_4948	#N/A	#N/A	#N/A
pos_3616	#N/A	#N/A	#N/A
pos_4703	3-propyl acrolein	C08497	--
pos_4945	#N/A	#N/A	#N/A
pos_492	#N/A	#N/A	#N/A
pos_3608	Xanthosine 5'-phosphate	C00655	Purine metabolism(ko00230);;Biosynthesis of plant secondary metabolites(ko01060);;Biosynthesis of alkaloids derived from histidine and purine(ko01065);;Metabolic pathways(ko01100);;Biosynthesis of secondary metabolites(ko01110);;Nucleotide metabolism(ko01232)
pos_1895	#N/A	#N/A	#N/A
pos_436	#N/A	#N/A	#N/A
pos_435	#N/A	#N/A	#N/A
pos_4918	#N/A	#N/A	#N/A
pos_2736	#N/A	#N/A	#N/A
pos_4913	#N/A	#N/A	#N/A
pos_3815	Brevianamide F	C20563	Staurosporine biosynthesis(ko00404);;Metabolic pathways(ko01100);;Biosynthesis of secondary metabolites(ko01110)
pos_690	#N/A	#N/A	#N/A
pos_2958	#N/A	#N/A	#N/A
pos_3802	#N/A	#N/A	#N/A
pos_3800	#N/A	#N/A	#N/A
pos_1618	#N/A	#N/A	#N/A
pos_1840	#N/A	#N/A	#N/A
pos_5196	3alpha,7alpha,12alpha,26-Tetrahydroxy-5beta-cholestane	C05446	Primary bile acid biosynthesis(ko00120);;Metabolic pathways(ko01100)
pos_1836	#N/A	#N/A	#N/A
pos_5185	#N/A	#N/A	#N/A
pos_5186	#N/A	#N/A	#N/A
pos_5188	#N/A	#N/A	#N/A
pos_2904	#N/A	#N/A	#N/A
pos_5160	#N/A	#N/A	#N/A
pos_5161	#N/A	#N/A	#N/A
pos_5399	4-Vinylcyclohexene	C19310	--
pos_5152	#N/A	#N/A	#N/A
pos_5155	#N/A	#N/A	#N/A
pos_5147	Canthaxanthin	C08583	Carotenoid biosynthesis(ko00906);;Biosynthesis of secondary metabolites(ko01110)
pos_5389	#N/A	#N/A	#N/A
pos_4299	#N/A	#N/A	#N/A
pos_4298	#N/A	#N/A	#N/A
pos_3195	#N/A	#N/A	#N/A
pos_4046	#N/A	#N/A	#N/A
pos_4287	#N/A	#N/A	#N/A
pos_5366	Heptadecatrienal	C16343	--
pos_3184	Benzaldehyde	C00261	Toluene degradation(ko00623);;Aminobenzoate degradation(ko00627);;Metabolic pathways(ko01100);;Microbial metabolism in diverse environments(ko01120);;Degradation of aromatic compounds(ko01220)
pos_3181	DL-Mandelic acid	C01984	Aminobenzoate degradation(ko00627);;Microbial metabolism in diverse environments(ko01120)
pos_5128	Arachidonate	C00219	Arachidonic acid metabolism(ko00590);;Linoleic acid metabolism(ko00591);;Biosynthesis of unsaturated fatty acids(ko01040);;Metabolic pathways(ko01100);;Ferroptosis(ko04216);;Necroptosis(ko04217);;Vascular smooth muscle contraction(ko04270);;Platelet activation(ko04611);;Fc epsilon RI signaling pathway(ko04664);;Fc gamma R-mediated phagocytosis(ko04666);;Retrograde endocannabinoid signaling(ko0472…
pos_5360	#N/A	#N/A	#N/A
pos_5121	20alpha,22beta-Dihydroxycholesterol	C05501	--
pos_2086	#N/A	#N/A	#N/A
pos_3171	#N/A	#N/A	#N/A
pos_5116	4,4'-Diaponeurosporene	C16145	Carotenoid biosynthesis(ko00906);;Biosynthesis of secondary metabolites(ko01110)
pos_3178	14,15-DHET	C14775	Arachidonic acid metabolism(ko00590);;Metabolic pathways(ko01100);;Serotonergic synapse(ko04726)
pos_5593	#N/A	#N/A	#N/A
pos_2087	Benzofuran	C14512	--
pos_908	Narbomycin	C11998	Biosynthesis of 12-, 14- and 16-membered macrolides(ko00522);;Metabolic pathways(ko01100);;Biosynthesis of secondary metabolites(ko01110)
pos_4010	4-Guanidinobutanamide	C03078	Arginine and proline metabolism(ko00330);;Metabolic pathways(ko01100)
pos_5344	#N/A	#N/A	#N/A
pos_2070	#N/A	#N/A	#N/A
pos_4490	9(10)-EpOME	C14825	--
pos_4258	#N/A	#N/A	#N/A
pos_4014	Pimelate	C02656	Biotin metabolism(ko00780);;Metabolic pathways(ko01100);;Biosynthesis of cofactors(ko01240)
pos_939	Caproic acid	C01585	--
pos_5336	#N/A	#N/A	#N/A
pos_4004	#N/A	#N/A	#N/A
pos_4488	#N/A	#N/A	#N/A
pos_3398	#N/A	#N/A	#N/A
pos_4003	#N/A	#N/A	#N/A
pos_4002	#N/A	#N/A	#N/A
pos_4485	#N/A	#N/A	#N/A
pos_3141	dCMP	C00239	Pyrimidine metabolism(ko00240);;Metabolic pathways(ko01100);;Nucleotide metabolism(ko01232)
pos_2293	#N/A	#N/A	#N/A
pos_3145	#N/A	#N/A	#N/A
pos_3386	N-Acetylneuraminate	C19910	--
pos_5320	#N/A	#N/A	#N/A
pos_1194	#N/A	#N/A	#N/A
pos_5312	#N/A	#N/A	#N/A
pos_5313	#N/A	#N/A	#N/A
pos_5317	#N/A	#N/A	#N/A
pos_3137	#N/A	#N/A	#N/A
pos_2043	#N/A	#N/A	#N/A
pos_5319	13-cis-retinol	C19962	--
pos_4693	(-)-Germacrene D	C16142	Sesquiterpenoid and triterpenoid biosynthesis(ko00909)
pos_2031	#N/A	#N/A	#N/A
pos_4692	1,2-dihydrostilbene	C14685	--
pos_2036	#N/A	#N/A	#N/A
pos_4699	#N/A	#N/A	#N/A
pos_4456	#N/A	#N/A	#N/A
pos_3366	#N/A	#N/A	#N/A
pos_4697	9-cis-retinal	C16681	Retinol metabolism(ko00830);;Metabolic pathways(ko01100)
pos_4212	#N/A	#N/A	#N/A
pos_4695	Eicosapentaenoic acid	C06428	Biosynthesis of unsaturated fatty acids(ko01040)
pos_2275	#N/A	#N/A	#N/A
pos_4694	#N/A	#N/A	#N/A
pos_5309	1,2-Didecanoyl-sn-glycerol	C03199	--
pos_5532	#N/A	#N/A	#N/A
pos_5536	#N/A	#N/A	#N/A
pos_2269	#N/A	#N/A	#N/A
pos_4205	1,4-Cyclohexanedione	C08063	Aminobenzoate degradation(ko00627);;Microbial metabolism in diverse environments(ko01120)
pos_4687	#N/A	#N/A	#N/A
pos_4684	#N/A	#N/A	#N/A
pos_3587	5-Oxopentanoate	C03273	Lysine degradation(ko00310);;Metabolic pathways(ko01100);;Microbial metabolism in diverse environments(ko01120)
pos_4434	#N/A	#N/A	#N/A
pos_4673	#N/A	#N/A	#N/A
pos_4438	#N/A	#N/A	#N/A
pos_5769	1,2,4-Trimethylbenzene	C14533	--
pos_5750	#N/A	#N/A	#N/A
pos_5753	#N/A	#N/A	#N/A
pos_5754	#N/A	#N/A	#N/A
pos_2247	Biotin sulfone	C20387	Biotin metabolism(ko00780)
pos_4667	#N/A	#N/A	#N/A
pos_2485	#N/A	#N/A	#N/A
pos_4422	#N/A	#N/A	#N/A
pos_4664	#N/A	#N/A	#N/A
pos_4663	#N/A	#N/A	#N/A
pos_983	#N/A	#N/A	#N/A
pos_4669	#N/A	#N/A	#N/A
pos_5741	#N/A	#N/A	#N/A
pos_771	Chorismate	C00251	Ubiquinone and other terpenoid-quinone biosynthesis(ko00130);;Phenylalanine, tyrosine and tryptophan biosynthesis(ko00400);;Phenazine biosynthesis(ko00405);;Folate biosynthesis(ko00790);;Biosynthesis of various alkaloids(ko00996);;Biosynthesis of various other secondary metabolites(ko00997);;Biosynthesis of various antibiotics(ko00998);;Biosynthesis of siderophore group nonribosomal peptides(ko01…
pos_5502	#N/A	#N/A	#N/A
pos_5745	#N/A	#N/A	#N/A
pos_2236	#N/A	#N/A	#N/A
pos_4899	#N/A	#N/A	#N/A
pos_4410	#N/A	#N/A	#N/A
pos_2472	#N/A	#N/A	#N/A
pos_776	#N/A	#N/A	#N/A
pos_4418	#N/A	#N/A	#N/A
pos_4417	#N/A	#N/A	#N/A
pos_5748	alpha-Mangostin	C10080	--
pos_2460	Bellidifolin	C10053	--
pos_2467	Quercetin 3-galactoside	C10073	--
pos_4888	#N/A	#N/A	#N/A
pos_4403	#N/A	#N/A	#N/A
pos_3796	#N/A	#N/A	#N/A
pos_4885	#N/A	#N/A	#N/A
pos_4882	#N/A	#N/A	#N/A
pos_4881	#N/A	#N/A	#N/A
pos_1126	Campesterol	C01789	--
pos_3785	#N/A	#N/A	#N/A
pos_4872	#N/A	#N/A	#N/A
pos_2450	Hypoxylone	C10355	--
pos_4871	#N/A	#N/A	#N/A
pos_4870	#N/A	#N/A	#N/A
pos_1128	#N/A	#N/A	#N/A
pos_4865	#N/A	#N/A	#N/A
pos_2443	#N/A	#N/A	#N/A
pos_4622	#N/A	#N/A	#N/A
pos_4621	9,12,13-TriHOME	C14833	Linoleic acid metabolism(ko00591)
pos_3772	#N/A	#N/A	#N/A
pos_2207	#N/A	#N/A	#N/A
pos_2449	Nicotinate D-ribonucleotide	C01185	Nicotinate and nicotinamide metabolism(ko00760);;Metabolic pathways(ko01100);;Biosynthesis of cofactors(ko01240)
pos_4868	#N/A	#N/A	#N/A
pos_2448	#N/A	#N/A	#N/A
pos_2676	#N/A	#N/A	#N/A
pos_3521	#N/A	#N/A	#N/A
pos_4619	#N/A	#N/A	#N/A
pos_4858	#N/A	#N/A	#N/A
pos_4856	#N/A	#N/A	#N/A
pos_5705	4,4-Dimethylcholesta-8,14,24-trienol	C11455	Steroid biosynthesis(ko00100);;Metabolic pathways(ko01100);;Biosynthesis of secondary metabolites(ko01110)
pos_4840	#N/A	#N/A	#N/A
pos_4608	#N/A	#N/A	#N/A
pos_3518	#N/A	#N/A	#N/A
pos_4606	#N/A	#N/A	#N/A
pos_3757	#N/A	#N/A	#N/A
pos_4846	4-Isopropylbenzyl alcohol	C06576	Xylene degradation(ko00622);;Metabolic pathways(ko01100);;Microbial metabolism in diverse environments(ko01120);;Degradation of aromatic compounds(ko01220)
pos_594	4,5-Dioxopentanoate	C02800	Porphyrin metabolism(ko00860)
pos_596	#N/A	#N/A	#N/A
pos_3502	#N/A	#N/A	#N/A
pos_3501	3-Dehydroshikimate	C02637	Phenylalanine, tyrosine and tryptophan biosynthesis(ko00400);;Biosynthesis of various plant secondary metabolites(ko00999);;Biosynthesis of siderophore group nonribosomal peptides(ko01053);;Biosynthesis of plant secondary metabolites(ko01060);;Biosynthesis of phenylpropanoids(ko01061);;Biosynthesis of alkaloids derived from shikimate pathway(ko01063);;Metabolic pathways(ko01100);;Biosynthesis of …
pos_2418	#N/A	#N/A	#N/A
pos_4839	#N/A	#N/A	#N/A
pos_2659	Dihydrourocanate	C20522	Histidine metabolism(ko00340)
pos_3972	#N/A	#N/A	#N/A
pos_4819	#N/A	#N/A	#N/A
pos_3968	#N/A	#N/A	#N/A
pos_4815	#N/A	#N/A	#N/A
pos_3966	#N/A	#N/A	#N/A
pos_2863	#N/A	#N/A	#N/A
pos_3953	L-Alanine	C01401	Cyanoamino acid metabolism(ko00460);;Metabolic pathways(ko01100)
pos_3954	Taxa-4(20),11(12)-dien-5alpha-acetoxy-10beta-ol	C11898	Diterpenoid biosynthesis(ko00904);;Biosynthesis of secondary metabolites(ko01110)
pos_2610	#N/A	#N/A	#N/A
pos_2853	#N/A	#N/A	#N/A
pos_3944	#N/A	#N/A	#N/A
pos_1999	#N/A	#N/A	#N/A
pos_2844	#N/A	#N/A	#N/A
pos_1749	#N/A	#N/A	#N/A
pos_1988	#N/A	#N/A	#N/A
pos_1970	8-Epideoxyloganic acid	C11647	--
pos_564	#N/A	#N/A	#N/A
pos_1728	#N/A	#N/A	#N/A
pos_5079	#N/A	#N/A	#N/A
pos_1951	Rhizocticin A	C17944	Phosphonate and phosphinate metabolism(ko00440)
pos_1954	#N/A	#N/A	#N/A
pos_1955	#N/A	#N/A	#N/A
pos_2807	Visnagin	C09049	Biosynthesis of plant secondary metabolites(ko01060)
pos_5068	Neurosporaxanthin	C08607	Carotenoid biosynthesis(ko00906);;Metabolic pathways(ko01100);;Biosynthesis of secondary metabolites(ko01110)
pos_5060	#N/A	#N/A	#N/A
pos_5066	#N/A	#N/A	#N/A
pos_5057	#N/A	#N/A	#N/A
pos_5056	#N/A	#N/A	#N/A
pos_1938	trans-beta-D-Glucosyl-2-hydroxycinnamate	C05158	Biosynthesis of various plant secondary metabolites(ko00999);;Biosynthesis of secondary metabolites(ko01110)
pos_5284	#N/A	#N/A	#N/A
pos_1927	1,3-Diaminopropane	C00986	Glycine, serine and threonine metabolism(ko00260);;Arginine and proline metabolism(ko00330);;beta-Alanine metabolism(ko00410);;Metabolic pathways(ko01100);;Microbial metabolism in diverse environments(ko01120)
pos_3097	#N/A	#N/A	#N/A
pos_4185	#N/A	#N/A	#N/A
pos_4183	#N/A	#N/A	#N/A
pos_5270	#N/A	#N/A	#N/A
pos_4189	#N/A	#N/A	#N/A
pos_5033	#N/A	#N/A	#N/A
pos_4176	17alpha-Hydroxyprogesterone	C01176	Steroid hormone biosynthesis(ko00140);;Metabolic pathways(ko01100);;Ovarian steroidogenesis(ko04913);;Cortisol synthesis and secretion(ko04927);;Cushing syndrome(ko04934)
pos_5266	#N/A	#N/A	#N/A
pos_5268	#N/A	#N/A	#N/A
pos_3084	#N/A	#N/A	#N/A
pos_4173	#N/A	#N/A	#N/A
pos_5269	#N/A	#N/A	#N/A
pos_5261	Tetralin	C14114	Naphthalene degradation(ko00626);;Microbial metabolism in diverse environments(ko01120)
pos_5021	#N/A	#N/A	#N/A
pos_1900	2-Hydroxy-cis-hex-2,4-dienoate	C11354	Xylene degradation(ko00622);;Steroid degradation(ko00984);;Metabolic pathways(ko01100);;Microbial metabolism in diverse environments(ko01120);;Degradation of aromatic compounds(ko01220)
pos_5257	#N/A	#N/A	#N/A
pos_3073	#N/A	#N/A	#N/A
pos_5258	Ethylbenzene	C07111	Ethylbenzene degradation(ko00642);;Metabolic pathways(ko01100);;Microbial metabolism in diverse environments(ko01120);;Degradation of aromatic compounds(ko01220)
pos_3072	#N/A	#N/A	#N/A
pos_5259	(S)-1-Pyrroline-5-carboxylate	C03912	Alanine, aspartate and glutamate metabolism(ko00250);;Arginine and proline metabolism(ko00330);;Carbapenem biosynthesis(ko00332);;Metabolic pathways(ko01100);;Biosynthesis of secondary metabolites(ko01110);;Biosynthesis of amino acids(ko01230)
pos_4396	#N/A	#N/A	#N/A
pos_4150	#N/A	#N/A	#N/A
pos_5007	#N/A	#N/A	#N/A
pos_5240	#N/A	#N/A	#N/A
pos_4157	#N/A	#N/A	#N/A
pos_3296	#N/A	#N/A	#N/A
pos_3053	#N/A	#N/A	#N/A
pos_4146	#N/A	#N/A	#N/A
pos_2193	Methacycline	C07654	--
pos_5228	3alpha,7alpha-Dihydroxy-5beta-cholestane	C05452	Primary bile acid biosynthesis(ko00120);;Metabolic pathways(ko01100)
pos_813	Iminoaspartate	C05840	Nicotinate and nicotinamide metabolism(ko00760);;Metabolic pathways(ko01100);;Biosynthesis of cofactors(ko01240)
pos_818	#N/A	#N/A	#N/A
pos_2184	4-Hydroxyphenylacetate	C13636	Bisphenol degradation(ko00363);;Metabolic pathways(ko01100);;Microbial metabolism in diverse environments(ko01120)
pos_2185	#N/A	#N/A	#N/A
pos_2183	#N/A	#N/A	#N/A
pos_4368	#N/A	#N/A	#N/A
pos_2188	4-Hydroxy-3-methoxycinnamic acid	C01494	Phenylpropanoid biosynthesis(ko00940);;Biosynthesis of phenylpropanoids(ko01061);;Metabolic pathways(ko01100);;Biosynthesis of secondary metabolites(ko01110)
pos_5691	#N/A	#N/A	#N/A
pos_3034	3,4-Dihydroxyphenylacetaldehyde	C04043	Tyrosine metabolism(ko00350);;Isoquinoline alkaloid biosynthesis(ko00950);;Metabolic pathways(ko01100);;Biosynthesis of secondary metabolites(ko01110);;Parkinson disease(ko05012)
pos_4123	#N/A	#N/A	#N/A
pos_4364	#N/A	#N/A	#N/A
pos_5200	#N/A	#N/A	#N/A
pos_2172	#N/A	#N/A	#N/A
pos_5206	Scopolamine	C01851	--
pos_2175	#N/A	#N/A	#N/A
pos_5675	#N/A	#N/A	#N/A
pos_4580	#N/A	#N/A	#N/A
pos_3496	5-Amino-6-(1-D-ribitylamino)uracil	C04732	Methane metabolism(ko00680);;Riboflavin metabolism(ko00740);;Metabolic pathways(ko01100);;Biosynthesis of secondary metabolites(ko01110);;Microbial metabolism in diverse environments(ko01120);;Biosynthesis of cofactors(ko01240)
pos_5671	#N/A	#N/A	#N/A
pos_5664	#N/A	#N/A	#N/A
pos_5423	#N/A	#N/A	#N/A
pos_3247	#N/A	#N/A	#N/A
pos_4334	#N/A	#N/A	#N/A
pos_1051	#N/A	#N/A	#N/A
pos_2382	#N/A	#N/A	#N/A
pos_4561	#N/A	#N/A	#N/A
pos_5651	#N/A	#N/A	#N/A
pos_2383	Rutin	C05625	Flavone and flavonol biosynthesis(ko00944);;Metabolic pathways(ko01100);;Biosynthesis of secondary metabolites(ko01110)
pos_4560	#N/A	#N/A	#N/A
pos_5653	#N/A	#N/A	#N/A
pos_2388	#N/A	#N/A	#N/A
pos_2147	#N/A	#N/A	#N/A
pos_2385	#N/A	#N/A	#N/A
pos_5650	#N/A	#N/A	#N/A
