# Supplementary material for: Integration of Metabolome and Transcriptome Reveals the Major Metabolic Pathways and Potential Biomarkers in Response to Freeze-Stress Regulation in Apple (Malus domestica)
Source: MDPI journal article supplement (doi:10.3390/metabo13080891), 2023-07-27
Supplement: s1 [file Table S5.xlsx]

## Sheet: Sheet1
Table S5. RNA-seq data statistics and quality control.
Samples	Clean reads	Clean bases	GC Content	≥Q30	Mapped Reads
fs11	29450915	8816534414	0.4641	0.9495	0.9146
fs12	29445168	8809274078	0.4609	0.9536	0.9294
fs13	24290797	7269505804	0.4612	0.9514	0.9101
fs21	20946977	6270131316	0.4623	0.9468	0.9127
fs22	28555063	8548775022	0.4626	0.9465	0.9225
fs23	25693647	7692003778	0.4643	0.9505	0.9252
fs31	24396715	7303068154	0.4666	0.9525	0.9131
fs32	20714559	6197939720	0.4643	0.9674	0.9353
fs33	26854739	8036761216	0.4662	0.9518	0.9038
gg11	20427578	6116259718	0.4594	0.9519	0.9219
gg12	26772501	8012310264	0.4597	0.9517	0.9129
gg13	29419430	8801398534	0.4588	0.9548	0.9069
gg21	25786362	7717847498	0.4637	0.9527	0.8889
gg22	26118213	7821208282	0.4652	0.9502	0.9263
gg23	29322589	8775944790	0.4597	0.9593	0.9182
gg31	28806799	8620609984	0.465	0.9523	0.8969
gg32	20914188	6259219664	0.4644	0.953	0.9254
gg33	20831542	6237518014	0.4618	0.9583	0.9178
gg41	29789302	8916888258	0.4611	0.9585	0.9173
gg42	29323531	8779885830	0.4679	0.9542	0.9069
gg43	21108212	6319656522	0.4623	0.9416	0.8635
gg51	21186027	6340444848	0.464	0.9607	0.9209
gg52	28788204	8619583794	0.4658	0.9515	0.9199
gg53	24953087	7469651618	0.468	0.9484	0.8681
