# Supplementary material for: Integration of Metabolome and Transcriptome Reveals the Major Metabolic Pathways and Potential Biomarkers in Response to Freeze-Stress Regulation in Apple (Malus domestica)
Source: MDPI journal article supplement (doi:10.3390/metabo13080891), 2023-07-27
Supplement: s1 [file Table S6.xlsx]

## Sheet: Sheet1
Table S6. GO enrichment of up-regulated genes between 'Ralls' and 'Fuji' under different low temperatures.
GO_classify1	GO_classify2	Gene number
		fs1 vs gg1	fs2 vs gg2	fs3 vs gg3
molecular function	binding	333	256	234
molecular function	catalytic activity	248	210	179
biological process	metabolic process	234	209	186
biological process	cellular process	222	198	170
cellular component	membrane	200	149	131
biological process	multi-organism process	182	151	130
cellular component	cell	151	142	135
cellular component	cell part	151	142	135
cellular component	membrane part	174	135	117
cellular component	organelle	128	112	109
biological process	biological regulation	128	89	90
biological process	response to stimulus	82	65	60
biological process	localization	51	37	40
cellular component	organelle part	36	40	33
biological process	cellular component organization or biogenesis	33	29	29
biological process	signaling	41	24	24
cellular component	macromolecular complex	23	32	28
molecular function	transporter activity	25	23	22
molecular function	nucleic acid binding transcription factor activity	32	11	23
biological process	developmental process	18	17	15
biological process	multicellular organismal process	20	14	13
biological process	multi-organism process	15	13	11
cellular component	membrane-enclosed lumen	9	12	12
molecular function	structural molecule activity	8	13	7
biological process	reproduction	11	9	8
biological process	reproductive process	11	9	8
biological process	detoxification	2	6	6
cellular component	other organism	4	6	2
cellular component	other organism part	4	6	2
biological process	immune system process	4	5	3
molecular function	transcription factor activity, protein binding	8	1	1
molecular function	antioxidant activity	1	5	4
molecular function	molecular function regulator	5	1	4
cellular component	extracellular region	3	3	3
cellular component	supramolecular complex	2	4	3
molecular function	electron carrier activity	3	4	2
biological process	growth	2	3	3
cellular component	cell junction	3	1	2
cellular component	symplast	3	1	2
cellular component	nucleoid	1	0	2
cellular component	synapse part	1	0	1
cellular component	synapse	1	0	1
molecular function	signal transducer activity	1	0	1
molecular function	molecular transducer activity	1	0	0
biological process	rhythmic process	0	1	0
