# Supplementary material for: Integration of Metabolome and Transcriptome Reveals the Major Metabolic Pathways and Potential Biomarkers in Response to Freeze-Stress Regulation in Apple (Malus domestica)
Source: MDPI journal article supplement (doi:10.3390/metabo13080891), 2023-07-27
Supplement: s1 [file Table S7.xlsx]

## Sheet: Sheet1
Table S7. KEGG enrichment of shared up-regulated genes.
ko ID	Pathway
ko03040	Spliceosome
ko04130	SNARE interactions in vesicular transport
ko03440	Homologous recombination
ko00965	Betalain biosynthesis
ko00920	Sulfur metabolism
ko04016	MAPK signaling pathway - plant
ko04136	Autophagy - other
ko00600	Sphingolipid metabolism
ko00400	Phenylalanine, tyrosine and tryptophan biosynthesis
ko03008	Ribosome biogenesis in eukaryotes
ko00564	Glycerophospholipid metabolism
ko00520	Amino sugar and nucleotide sugar metabolism
ko00563	Glycosylphosphatidylinositol (GPI)-anchor biosynthesis
ko00640	Propanoate metabolism
ko00562	Inositol phosphate metabolism
ko00561	Glycerolipid metabolism
ko00240	Pyrimidine metabolism
ko00360	Phenylalanine metabolism
ko00040	Pentose and glucuronate interconversions
ko00480	Glutathione metabolism
ko00280	Valine, leucine and isoleucine degradation
ko04120	Ubiquitin mediated proteolysis
ko03030	DNA replication
ko03430	Mismatch repair
ko01210	2-Oxocarboxylic acid metabolism
ko01212	Fatty acid metabolism
ko00730	Thiamine metabolism
ko00970	Aminoacyl-tRNA biosynthesis
ko00330	Arginine and proline metabolism
ko00010	Glycolysis / Gluconeogenesis
ko00130	Ubiquinone and other terpenoid-quinone biosynthesis
ko00053	Ascorbate and aldarate metabolism
ko00052	Galactose metabolism
ko00051	Fructose and mannose metabolism
ko00908	Zeatin biosynthesis
ko03060	Protein export
ko00906	Carotenoid biosynthesis
ko00905	Brassinosteroid biosynthesis
ko04075	Plant hormone signal transduction
ko03022	Basal transcription factors
ko00945	Stilbenoid, diarylheptanoid and gingerol biosynthesis
ko02010	ABC transporters
ko03420	Nucleotide excision repair
ko00944	Flavone and flavonol biosynthesis
ko00943	Isoflavonoid biosynthesis
ko01200	Carbon metabolism
ko00941	Flavonoid biosynthesis
ko00940	Phenylpropanoid biosynthesis
ko00500	Starch and sucrose metabolism
ko00620	Pyruvate metabolism
ko00740	Riboflavin metabolism
ko00860	Porphyrin and chlorophyll metabolism
ko00100	Steroid biosynthesis
ko00220	Arginine biosynthesis
ko00340	Histidine metabolism
ko00460	Cyanoamino acid metabolism
ko00020	Citrate cycle (TCA cycle)
ko00260	Glycine, serine and threonine metabolism
ko00380	Tryptophan metabolism
ko00061	Fatty acid biosynthesis
ko04141	Protein processing in endoplasmic reticulum
ko04144	Endocytosis
ko03010	Ribosome
ko03013	RNA transport
ko01230	Biosynthesis of amino acids
ko04146	Peroxisome
ko00910	Nitrogen metabolism
ko03015	mRNA surveillance pathway
ko03410	Base excision repair
ko00710	Carbon fixation in photosynthetic organisms
ko00511	Other glycan degradation
ko00950	Isoquinoline alkaloid biosynthesis
ko03018	RNA degradation
ko04626	Plant-pathogen interaction
ko00230	Purine metabolism
ko00350	Tyrosine metabolism
ko00030	Pentose phosphate pathway
ko00073	Cutin, suberine and wax biosynthesis
ko00270	Cysteine and methionine metabolism
ko00190	Oxidative phosphorylation
