# Supplementary material for: Integration of Metabolome and Transcriptome Reveals the Major Metabolic Pathways and Potential Biomarkers in Response to Freeze-Stress Regulation in Apple (Malus domestica)
Source: MDPI journal article supplement (doi:10.3390/metabo13080891), 2023-07-27
Supplement: s1 [file Table S8.xlsx]

## Sheet: Sheet1
Table S8. Identification and annotation of orthologous sequences of DEG encoded proteins.
Protein UD	Identity	Bit score	Preferred Name	Annotation
HF23511	84.6	372.5	CHY2	Beta-carotene 3-hydroxylase 2, chloroplastic; Nonheme diiron monooxygenase involved in the biosynthesis of xanthophylls. Specific for beta-ring hydroxylations of beta-carotene. Has also a low activity toward the beta- and epsilon-rings of alpha-carotene. No activity with acyclic carotenoids such as lycopene and neurosporene. Uses ferredoxin as an electron donor (Probable); Belongs to the sterol d…
HF06845	73.1	416.4	ABA2	NAD(P)-binding Rossmann-fold superfamily protein; Encodes a cytosolic short-chain dehydrogenase/reductase involved in the conversion of xanthoxin to ABA-aldehyde during ABA biosynthesis. Mutants are insensitive to sucrose and glucose
HF19130	34.7	88.6	GA2OX8	Gibberellin 2-beta-dioxygenase 8; Catalyzes the 2-beta-hydroxylation of gibberellins (GA) precursors, rendering them unable to be converted to active GAs. Hydroxylates the C20-GA GA12 and GA53, but is not active on C19- GAs, like GA1, GA4, GA9 and GA20; Belongs to the iron/ascorbate-dependent oxidoreductase family. GA2OX subfamily
HF27116	74.3	392.1	ARGAH1	Arginase 1, mitochondrial; Catalyzes the hydrolysis of L-arginine to urea and L- ornithine. The latter can be utilized in the urea cycle or as a precursor for the synthesis of both polyamines and proline. Possesses agmatinase activity. Catalyzes the formation of putrescine from agmatine
HF27176	62	651.7	CYP704A2	Cytochrome P450, family 704, subfamily A, polypeptide 2; Member of CYP704A; Belongs to the cytochrome P450 family
HF02826	55.1	149.1	ZFN1	Zinc finger ccch domain-containing protein 33; Encodes a zinc finger protein
HF02828	45.8	104.8	ZFN1	Zinc finger ccch domain-containing protein 33; Encodes a zinc finger protein
HF02832	43.1	66.6	HF40459	Lysosomal acid lipase/cholesteryl ester hydrolase; Triacylglycerol lipase 1; Lipase active on medium and short chain triacylglycerols, but not on phospho- or galactolipids. Active between pH4 and 7 with an optimum at pH6. Knock-out mutant has not obvious phenotype. Predicted to be extracellular
HF04086	73.2	2030	XDH1	Xanthine dehydrogenase/oxidase; Xanthine dehydrogenase 1; Key enzyme involved in purine catabolism. Catalyzes the oxidation of hypoxanthine to xanthine and the oxidation of xanthine to urate. Regulates the level of ureides and plays an important role during plant growth and development, senescence and response to stresses. Possesses NADH oxidase activity and may contribute to the generation of su…
HF39626	76.5	513.8	DIN4	2-oxoisovalerate dehydrogenase subunit beta 2, mitochondrial; The branched-chain alpha-keto dehydrogenase complex catalyzes the overall conversion of alpha-keto acids to acyl-CoA and CO(2). It contains multiple copies of three enzymatic components: branched-chain alpha-keto acid decarboxylase (E1), lipoamide acyltransferase (E2) and lipoamide dehydrogenase (E3) (By similarity). Required during su…
HF39985	77.3	804.7	C4H	Reduced eprdermal fluorescence 3; Trans-cinnamate 4-monooxygenase; Controls carbon flux to pigments essential for pollination or UV protection, to numerous pytoalexins synthesized by plants when challenged by pathogens, and to lignins
HF40459	36.6	82.4	F25L23.50	F-box/LRR-repeat protein At3g59190; F-box/RNI-like superfamily protein; Contains the following InterPro domains: F-box domain, cyclin-like (InterPro:IPR001810), F-box domain, Skp2-like (InterPro:IPR022364), Leucine-rich repeat 2 (InterPro:IPR013101); BEST Arabidopsis thaliana protein match is: F-box/RNI-like superfamily protein (TAIR:AT4G14103.2); Has 1982 Blast hits to 1934 proteins in 26 specie…
HF00746	61.8	562	T8E3.5	N-hydroxycinnamoyl/benzoyltransferase, putative; HXXXD-type acyl-transferase family protein; Its function is described as transferase activity, transferring acyl groups other than amino-acyl groups, quinone binding, primary amine oxidase activity, copper ion binding, transferase activity; Involved in oxidation reduction, amine metabolic process; Located in chloroplast; Expressed in 8 plant struct…
HF01558	75	511.5	ADK2	Encodes adenosine kinase 2 (ADK2), a typical, constitutively expressed housekeeping enzyme. Shows a high sequence identity with ADK1. Involved in salvage synthesis of adenylates and methyl recycling. Enzyme activity is substantially inhibited in roots, siliques and dry seeds by an unknown compound. May contribute to cytokinin interconversion; Belongs to the carbohydrate kinase PfkB family
HF15427	63.6	479.9	JOX2	2-oxoglutarate (2OG) and Fe(II)-dependent oxygenase superfamily protein; Involved in anthocyanin and protoanthocyanidin biosynthesis by catalyzing the oxidation of leucoanthocyanidins into anthocyanidins (By similarity). May be involved in the catabolism of cytotoxic polycyclic aromatic hydrocarbons (PAHs)
HF10553	41.4	410.2	FMO1	Dimethylaniline monooxygenase (n-oxide forming); Probable flavin-containing monooxygenase 1; FMO1 is required for full expression of TIR-NB-LRR-conditioned resistance to avirulent pathogens and for basal resistance to invasive virulent pathogens. Functions in an EDS1-regulated but SA-independent mechanism that promotes resistance and cell death at pathogen infection sites
HF10561	42.1	412.5	FMO1	Dimethylaniline monooxygenase (n-oxide forming); Probable flavin-containing monooxygenase 1; FMO1 is required for full expression of TIR-NB-LRR-conditioned resistance to avirulent pathogens and for basal resistance to invasive virulent pathogens. Functions in an EDS1-regulated but SA-independent mechanism that promotes resistance and cell death at pathogen infection sites
HF12391	73.5	666	PFK2	6-phosphofructokinase 1; Catalyzes the phosphorylation of D-fructose 6-phosphate to fructose 1,6-bisphosphate by ATP, the first committing step of glycolysis
HF08643	72.6	639.4	KASI	3-oxoacyl-[acyl-carrier-protein] synthase I, chloroplastic; Catalyzes the condensation reaction of fatty acid synthesis by the addition to an acyl acceptor of two carbons from malonyl-ACP. Specific for elongation from C-10 to unsaturated C-16 and C-18 fatty acids (By similarity)
HF09172	45.4	402.9	CBP60A	Calmodulin binding protein-like protein; Transcription activator that binds DNA in a sequence-specific manner, likely 5'-GAAATTTTGG-3', to promote the expression of target genes
HF16814	63.9	411	F7K24.190	NAD(P)-binding Rossmann-fold superfamily protein; Similar to Eucalyptus gunnii alcohol dehydrogenase of unknown physiological function (GI:1143445), apple tree, PIR:T16995; NOT a cinnamyl-alcohol dehydrogenase
HF16819	42	79.3	LIP1	Lysosomal acid lipase/cholesteryl ester hydrolase; Triacylglycerol lipase 1; Lipase active on medium and short chain triacylglycerols, but not on phospho- or galactolipids. Active between pH4 and 7 with an optimum at pH6. Knock-out mutant has not obvious phenotype. Predicted to be extracellular
HF20971	87.8	685.3	SMT2	24-methylenesterol C-methyltransferase 2; Encodes a sterol-C24-methyltransferases involved in sterol biosynthesis. Mutants display altered sterol composition, serrated petals and sepals and altered cotyledon vascular patterning as well as ectopic endoreduplication. This suggests that suppression of endoreduplication is important for petal morphogenesis and that normal sterol composition is requir…
HF21107	41	214.9	DFR	Bifunctional dihydroflavonol 4-reductase/flavanone 4-reductase; Dihydroflavonol reductase. Catalyzes the conversion of dihydroquercetin to leucocyanidin in the biosynthesis of anthocyanins
HF33398	41.1	312	PMAT2	HXXXD-type acyl-transferase family protein; Malonyltransferase acting on xenobiotic glucosides. Has activity toward 2-Naphthol glucoside (2NAG), 1-Naphthol glucoside (1NAG), kaempferol 7-O-glucoside, hydroxycoumarin glucosides and phenol-glucosides, but not toward kaempferol 3-O-glucoside or daidzin. Prefers phenol glucosides rather than naphtol glucosides. In vivo, seems to be involved in the ma…
HF33401	40.4	317.4	PMAT1	HXXXD-type acyl-transferase family protein; Its function is described as transferase activity, transferring acyl groups other than amino-acyl groups, transferase activity; Involved in biological_process unknown; Expressed in 12 plant structures; Expressed during 6 growth stages; Contains the following InterPro domains: Transferase (InterPro:IPR003480); BEST Arabidopsis thaliana protein match is: …
HF34033	72.3	525.8	PSY	Phytoene synthase, chloroplastic; Catalyzes the reaction from prephytoene diphosphate to phytoene; Belongs to the phytoene/squalene synthase family
HF09713	62.3	433.3	PER12	Peroxidase superfamily protein; Removal of H(2)O(2), oxidation of toxic reductants, biosynthesis and degradation of lignin, suberization, auxin catabolism, response to environmental stresses such as wounding, pathogen attack and oxidative stress. These functions might be dependent on each isozyme/isoform in each plant tissue; Belongs to the peroxidase family. Classical plant (class III) peroxidas…
HF09884	75.1	579.7	ADH1	Arabidopsis thaliana alcohol dehydrogenase; Alcohol dehydrogenase class-P; Alcohol dehydrogenase mostly active on ethanol (EtOH), but exhibits broad substrates selectivity for primary and secondary alcohols (e.g. butanol, propyl alcohol, pentanol, isopentanol, ethylene glycol, isopropanol, methanol and tertiary butyl alcohol). Converts allyl alcohol to highly toxic acryl-aldehyde. Required for su…
HF22738	48	464.2	CYP94B1	Cytochrome p450, family 94, subfamily b, polypeptide 1; Hydroxylase involved in the oxidation of the plant hormone jasmonoyl-L-isoleucine (JA-Ile), a bioactive phytohormone of the jasmonate-mediated signaling pathway. Converts JA-Ile to 12-hydroxy-JA- Ile
HF22784	44.5	310.8	CRR28	2-oxoglutarate (2OG) and Fe(II)-dependent oxygenase superfamily protein; Its function is described as oxidoreductase activity; Located in cellular_component unknown; Expressed in stem, root; Contains the following InterPro domains: Oxoglutarate/iron-dependent oxygenase (InterPro:IPR005123); BEST Arabidopsis thaliana protein match is: 2-oxoglutarate (2OG) and Fe(II)-dependent oxygenase superfamily…
HF29862	68.7	357.8	ATSDI1	Tetratricopeptide repeat (TPR)-like superfamily protein; Homologous to the wheat sulphate deficiency-induced gene sdi1. Expression in root and leaf is induced by sulfur starvation. Knockout mutants retained higher root and leaf sulfate concentrations, indicating a role in regulation of stored sulfate pools; Belongs to the MS5 protein family
HF36209	70.7	640.6	AQI	Peptidase M20/M25/M40 family protein; Its function is described as hydrolase activity, metallopeptidase activity, aminoacylase activity; Involved in response to zinc ion; Located in vacuole; Expressed in 23 plant structures; Expressed during 15 growth stages; Contains the following InterPro domains: ArgE/DapE/ACY1/CPG2/YscS, conserved site (InterPro:IPR001261), Peptidase M20 (InterPro:IPR002933),…
HF03481	74.4	854.7	AT-HF	Imidazole glycerol phosphate synthase hisHF, chloroplastic; IGPS catalyzes the conversion of PRFAR and glutamine to IGP, AICAR and glutamate. The glutamine amidotransferase domain provides the ammonia necessary to the cyclase domain to produce IGP and AICAR from PRFAR; In the C-terminal section; belongs to the HisA/HisF family
HF05780	57	1468.4	AAO1	Indole-3-acetaldehyde oxidase; In higher plants aldehyde oxidases (AO) appear to be homo- and heterodimeric assemblies of AO subunits with probably different physiological functions. AO-alpha may be involved in the biosynthesis of auxin, and in biosynthesis of abscisic acid (ABA) in seeds. In vitro, AO-alpha uses heptaldehyde, protocatechualdehyde, benzaldehyde, indole-3-aldehyde (IAld), indole-3…
HF05786	60.9	1635.2	AAO1	Indole-3-acetaldehyde oxidase; In higher plants aldehyde oxidases (AO) appear to be homo- and heterodimeric assemblies of AO subunits with probably different physiological functions. AO-alpha may be involved in the biosynthesis of auxin, and in biosynthesis of abscisic acid (ABA) in seeds. In vitro, AO-alpha uses heptaldehyde, protocatechualdehyde, benzaldehyde, indole-3-aldehyde (IAld), indole-3…
HF04894	60.2	113.2	ARGAH1	Arginase 1, mitochondrial; Catalyzes the hydrolysis of L-arginine to urea and L- ornithine. The latter can be utilized in the urea cycle or as a precursor for the synthesis of both polyamines and proline. Possesses agmatinase activity. Catalyzes the formation of putrescine from agmatine
HF05413	67.9	586.3	LPPD	Phosphatidic acid phosphatase (pap2) family protein; Functions as sphingoid long-chain base phosphate (LCBP) phosphatase. May play a role in the regulation of LCBP levels and be involved in stomatal responses through LCBP-mediated ABA signaling
HF37733	55	328.2	ACX4	Acyl-coenzyme A oxidase 4, peroxisomal; Encodes a short-chain acyl-CoA oxidase, which catalyzes the first step of peroxisomal fatty acid beta-oxidation during early, post-germinative growth in oilseed species. Null mutants virtually lack short-chain acyl-CoA and are resistant to 2,4-dichlorophenoxybutyric acid, which is converted to the herbicide and auxin analogue 2,4-dichlorophenoxyacetic acid …
HF38329	81.3	520.8	OASA1	O-acetylserine (thiol) lyase (oas-tl) isoform a1; Encodes a cytosolic isoform of cytosolic O-acetylserine(thiol)lyase, a key enzyme in cysteine biosynthesis and for the fixation of inorganic sulfide. It catalyzes the formation of cysteine from O-acetylserine and inorganic sulfide. Gene expression is predominant in the root cortex and the xylem parenchyma. Gene expression is induced in leave, stem…
HF42225	41	246.9	PCBER1	Nmra-like negative transcriptional regulator family protein; Oxidoreductase involved in lignan biosynthesis. Catalyzes the NADPH-dependent reduction of phenylcoumaran benzylic ethers. Converts dehydrodiconiferyl alcohol (DDC) to isodihydrodehydrodiconiferyl alcohol (IDDDC), and dihydrodehydrodiconiferyl alcohol (DDDC) to tetrahydrodehydrodiconiferyl alcohol (TDDC). Plays an important role in the …
HF41275	67.9	433.3	SPDS1	Spermidine synthase 1; Spermidine synthase
HF12739	63.6	555.4	AXX17	FAD/NAD(P)-binding oxidoreductase family protein; Its function is described as oxidoreductase activity, monooxygenase activity; Involved in oxidation reduction; Located in endomembrane system; Contains the following InterPro domains: Monooxygenase, FAD-binding (InterPro:IPR002938); BEST Arabidopsis thaliana protein match is: FAD/NAD(P)-binding oxidoreductase family protein (TAIR:AT2G35660.1); Has…
HF31060	77.6	793.5	CYP84A1	Ferulic acid 5-hydroxylase 1; Encodes ferulate 5-hydroxylase (F5H). Involved in lignin biosynthesis
HF44479	81.7	357.1	SHM7	Serine hydroxymethyltransferase 7; Catalyzes the interconversion of serine and glycine; Belongs to the SHMT family
HF07533	56.8	511.1	CYP704B1	Cytochrome P450, family 704, subfamily B, polypeptide 1; Encodes a cytochrome P450, designated CYP704B1. Expressed in the developing anthers. Essential for pollen exine development. Mutations in CYP704B1 result in impaired pollen walls that lack a normal exine layer and exhibit a characteristic striped surface, termed zebra phenotype. Heterologous expression of CYP704B1 in yeast cells demonstrate…
HF07700	38.8	248.4	F22H5.18	NAD(P)-binding Rossmann-fold superfamily protein; Encodes a protein whose sequence is similar to an isoflavone reductase
HF16285	46.4	261.5	T29E15.11	NAD(P)-binding Rossmann-fold superfamily protein; Its function is described as coenzyme binding, binding, cinnamoyl-CoA reductase activity, catalytic activity; Involved in lignin biosynthetic process, response to karrikin; Located in cellular_component unknown; Expressed in 19 plant structures; Expressed during 13 growth stages; Contains the following InterPro domains: NAD-dependent epimerase/deh…
HF19558	73.6	1231.5	CAS1	Cycloartenol synthase 1; Converts oxidosqualene to cycloartenol and 1% parkeol. Involved in plastid biogenesis. Essential for the male gametophyte function; Belongs to the terpene cyclase/mutase family
HF28860	44.7	268.5	CAS1	Cycloartenol synthase 1; Converts oxidosqualene to cycloartenol and 1% parkeol. Involved in plastid biogenesis. Essential for the male gametophyte function; Belongs to the terpene cyclase/mutase family
HF28861	31.9	159.1	CAS1	Cycloartenol synthase 1; Converts oxidosqualene to cycloartenol and 1% parkeol. Involved in plastid biogenesis. Essential for the male gametophyte function; Belongs to the terpene cyclase/mutase family
HF29367	44.1	183	UGT73B4	UDP-glycosyltransferase 73B4; Possesses quercetin 3-O-glucosyltransferase and low 7-O- glucosyltransferase activities in vitro. Also active in vitro on benzoates and benzoate derivatives. Can detoxify the explosive 2,4,6-trinitrotoluene in plant by forming O- or C-glucose conjugates; Belongs to the UDP-glycosyltransferase family
HF32157	77	817.8	SHM3	Serine hydroxymethyltransferase 3, chloroplastic; Catalyzes the interconversion of serine and glycine and directs the hydroxymethyl moiety of serine into the metabolic network of H4PteGlu(n)-bound one-carbon units; Belongs to the SHMT family
HF32319	72.6	401	TRPA1	Aldolase-type TIM barrel family protein; The alpha subunit is responsible for the aldol cleavage of indoleglycerol phosphate to indole and glyceraldehyde 3- phosphate (By similarity). Contributes to the tryptophan- independent indole biosynthesis, and possibly to auxin production; Belongs to the TrpA family
HF32403	50.6	411	TAT7	Tyrosine transaminase family protein; Transaminase involved in tyrosine breakdown. Converts tyrosine to p-hydroxyphenylpyruvate. Can catalyze the reverse reaction, using L-glutamate in vitro. Can convert phenylalanine to phenylpyruvate and catalyze the reverse reaction in vitro; Belongs to the class-I pyridoxal-phosphate-dependent aminotransferase family
